# Supplementary material for: Scientific and technological contributions of Latin America and Caribbean countries to the Zika virus outbreak
Source: BMC Public Health. 2019 May 9;19:530. doi: 10.1186/s12889-019-6842-x (PMC6507135; doi:10.1186/s12889-019-6842-x)
Supplement: Supplementary file 2 — ZIKAV-related patents with earliest priority date up to 12/31/2017 (XLSX 1728 kb) [file 12889_2019_6842_MOESM2_ESM.xlsx]

## Sheet: Plan1
FAN (Questel unique family ID)	CPC	IC	TECD	EPR.§1 (Earliest priority number)	EPR.§3 (Earliest standardized priority number)	EPRD (earliest priority date)	earliest priority year	TI (title)	IN (inventors)	OIN (non-latin inventors)	INH (inventor history)	PA (current assignees)	NPA (current standardized assignees - inventors removed)	FPA (latest standardized assignees - inventors removed)	OPA (non-latin assignees)	REAS (US-reassignements)	OWR (other reassignements)	PAH (assignee history)	PAAD.NAME (assignee name)	EAPC (earliest filing country)	Assignee type	EPRC (earliest priority country)	PAAD.COUNTRY (assignee country)	PAAD (assignee address)	INAD.COUNTRY (inventor country)	INAD (inventor address)	FAMILY_ACT.STATUS (family legal status)	ACT.STATUS (legal status)	FAMILY_ACT.STATE (family legal state)	ACT.STATE (legal state)	PDG (grant dates)	ACT.EED (expected expiry dates)	FCPC (main CPC)	FMIC (main IPC)	FNUM.NBPC (countries/authorities counts)	FNUM.NSCTG (non-self citing patents)	FNUM.NSCT (non-self cited patents)	FNUM.APAGE (Months between old and youngest family filing dates - Count)	NPN (number of patents)	DS (designated states)	TECD (technology domains)	KEYW (technical concepts)	AB (abstract)	ADB (advantages/previous drawbacks)	ICLM (independent claims)	OBJ (object of invention)	REF (cited non-patent literature)
7367759	C07K-2319/00_x000D_ C07K-2319/055_x000D_ C07K-2319/20_x000D_ C07K-2319/21_x000D_ C07K-2319/50_x000D_ C12N-005/0601_x000D_ C12N-005/0693_x000D_ C12N-009/10/07_x000D_ C12N-009/96_x000D_ C12N-015/62/5_x000D_ C12N-015/85_x000D_ C12N-2015/8518_x000D_ C12N-2510/02_x000D_ C12N-2800/105_x000D_ C12N-2800/107_x000D_ C12P-021/02_x000D_ C12Y-201/01063_x000D_ G01N-033/543/06_x000D_ G01N-033/543/13_x000D_ G01N…	A61K-039/00_x000D_ A61K-039/12_x000D_ A61K-039/385_x000D_ C07K-001/00_x000D_ C07K-014/08_x000D_ C07K-016/00_x000D_ C07K-016/08_x000D_ C07K-017/00_x000D_ C07K-019/00_x000D_ C12N-001/00_x000D_ C12N-001/20_x000D_ C12N-001/21_x000D_ C12N-005/07_x000D_ C12N-005/09_x000D_ C12N-005/10_x000D_ C12N-009/10_x000D_ C12N-009/96_x000D_ C12N-011/06_x000D_ C12N-015/00_x000D_ C12N-015/09_x000D_ C12N-015/62_x000D_…	Analysis of biological materials_x000D_ Biotechnology_x000D_ Pharmaceuticals	EP10306389	2010EP-0306389	2010-12-09	2010	(EP3202897)_x000D_ Mgmt-based method for obtaining high yield of recombinant protein expression	DESPRES PHILIPPE_x000D_ PAULOUS SYLVIE_x000D_ CRUBLET ELODIE	(JP5940554)_x000D_ フィリップ、デプレ_x000D_ シルビー、ポル_x000D_ エロディー、クリュブル	(EP3202897)_x000D_ DESPRES, Philippe_x000D_ PAULOUS, Sylvie_x000D_ CRUBLET, Elodie	ANTHITUT Â· PASTEUR_x000D_ INSTITUT PASTEUR	ANTHITUT Â· PASTEUR_x000D_ INSTITUT PASTEUR	INSTITUT PASTEUR	(JP5940554)_x000D_ アンスティテュ・パストゥール_x000D_ Reg. Nb: 501173391	DESPRES PHILIPPE; FROM 2014-10-24 TO 2014-11-20_x000D_ VANHOMWEGEN JESSICA; FROM 2014-10-24 TO 2014-11-26_x000D_ MANUGUERRA JEAN CLAUDE; FROM 2014-10-24 TO 2014-11-26_x000D_ PAULOUS SYLVIE; FROM 2014-10-24 TO 2014-11-28_x000D_ INSTITUT PASTEUR; FROM 2014-11-20	(US20150099656)_x000D_ INSTITUT PASTEUR; EFFD=2015-02-23_x000D_ (US9109219)_x000D_ INSTITUT PASTEUR; EFFD=2013-10-08_x000D_ (US9638692)_x000D_ INSTITUT PASTEUR; EFFD=2014-01-24	(EP3202897)_x000D_ Institut Pasteur ([FR])_x000D_ (EP2788478)_x000D_ Institut Pasteur ([FR])_x000D_ (EP2788478)_x000D_ Institut Pasteur ([FR])_x000D_ (EP2649178)_x000D_ Institut Pasteur ([FR])_x000D_ (EP2649178)_x000D_ Institut Pasteur ([FR])_x000D_ (EP2649178)_x000D_ Institut Pasteur ([FR])_x000D_ (EP2844748)_x000D_ Institut Pasteur ([FR])_x000D_ (EP2844748)_x000D_ Institut Pasteur ([FR])_x000D_…	(EP3202897)_x000D_ Institut Pasteur_x000D_ (EP2788478)_x000D_ Institut Pasteur_x000D_ (EP2788478)_x000D_ Institut Pasteur_x000D_ (EP2649178)_x000D_ Institut Pasteur_x000D_ (EP2649178)_x000D_ Institut Pasteur_x000D_ (EP2649178)_x000D_ Institut Pasteur_x000D_ (EP2844748)_x000D_ Institut Pasteur_x000D_ (EP2844748)_x000D_ Institut Pasteur_x000D_ (US20150099656)_x000D_ Institut Pasteur_x000D_ (US20130…	BR	ACADEMY	EP	(EP3202897)_x000D_ FR_x000D_ (EP2788478)_x000D_ FR_x000D_ (EP2788478)_x000D_ FR_x000D_ (EP2649178)_x000D_ FR_x000D_ (EP2649178)_x000D_ FR_x000D_ (EP2649178)_x000D_ FR_x000D_ (EP2844748)_x000D_ FR_x000D_ (EP2844748)_x000D_ FR_x000D_ (US20150099656)_x000D_ FR_x000D_ (US20130309747)_x000D_ FR_x000D_ (US9109219)_x000D_ FR_x000D_ (US20160017367)_x000D_ FR_x000D_ (US9546380)_x000D_ FR_x000D_ (US2014027…	(EP3202897)_x000D_ NAME=Institut Pasteur 25-28, rue du Docteur Roux , CITY=75015 Paris , COUNTRY=FR _x000D_ _x000D_ (EP2788478)_x000D_ NAME=Institut Pasteur 25-28, rue du Docteur Roux , CITY=75015 Paris , COUNTRY=FR _x000D_ _x000D_ (EP2788478)_x000D_ NAME=Institut Pasteur 25-28, rue du Docteur Roux , CITY=75015 Paris , COUNTRY=FR , REG=101058628 _x000D_ _x000D_ (EP2649178)_x000D_ NAME=Institut Pa…	(EP2788478)_x000D_ FR	(EP2788478)_x000D_ NAME=MANUGUERRA, Jean-Claude 16 - 18 Place de la Chapelle F-75018 Paris , COUNTRY=FR _x000D_ _x000D_ NAME=VANHOMWEGEN, Jessica 244 rue de Charenton F-75012 Paris , COUNTRY=FR _x000D_ _x000D_ NAME=DESPRES, Philippe 18 place de la LibertÃ© F-92250 La Garenne-Colombes , COUNTRY=FR _x000D_ _x000D_ NAME=PAULOUS, Sylvie 10 chemin des LavandiÃ¨res F-95200 Sarcelles , COUNTRY=FR _x000D_	GRANTED	(EP3202897)_x000D_ PENDING_x000D_ (EP2788478)_x000D_ GRANTED_x000D_ (EP2649178)_x000D_ GRANTED_x000D_ (EP2844748)_x000D_ GRANTED_x000D_ (US20150099656)_x000D_ PENDING_x000D_ (US20130309747)_x000D_ GRANTED_x000D_ (US20160017367)_x000D_ GRANTED_x000D_ (US20140274762)_x000D_ GRANTED_x000D_ (US20170276672)_x000D_ PENDING_x000D_ (US20170336412)_x000D_ PENDING_x000D_ (US20180038852)_x000D_ PENDING_x000…	ALIVE	(EP3202897)_x000D_ ALIVE_x000D_ (EP2788478)_x000D_ ALIVE_x000D_ (EP2649178)_x000D_ ALIVE_x000D_ (EP2844748)_x000D_ ALIVE_x000D_ (US20150099656)_x000D_ ALIVE_x000D_ (US20130309747)_x000D_ ALIVE_x000D_ (US20160017367)_x000D_ ALIVE_x000D_ (US20140274762)_x000D_ ALIVE_x000D_ (US20170276672)_x000D_ ALIVE_x000D_ (US20170336412)_x000D_ ALIVE_x000D_ (US20180038852)_x000D_ ALIVE_x000D_ (US20170088843)_x00…	(EP2788478)_x000D_ 2017-08-23_x000D_ (EP2649178)_x000D_ 2017-03-15_x000D_ (EP2844748)_x000D_ 2018-07-11_x000D_ (US9109219)_x000D_ 2015-08-18_x000D_ (US9546380)_x000D_ 2017-01-17_x000D_ (US9638692)_x000D_ 2017-05-02_x000D_ (US10017769)_x000D_ 2018-07-10_x000D_ (JP5940554)_x000D_ 2016-06-29_x000D_ (JP6215223)_x000D_ 2017-10-18_x000D_ (JP6316856)_x000D_ 2018-04-25_x000D_ (JP6351571)_x000D_ 2018-07-0…	(EP3202897)_x000D_ 2031-12-09_x000D_ (EP2788478)_x000D_ 2032-12-10_x000D_ (EP2649178)_x000D_ 2031-12-09_x000D_ (EP2844748)_x000D_ 2033-05-03_x000D_ (US20150099656)_x000D_ 2033-05-03_x000D_ (US20130309747)_x000D_ 2031-12-17_x000D_ (US20160017367)_x000D_ 2031-12-09_x000D_ (US20140274762)_x000D_ 2033-05-11_x000D_ (US20170276672)_x000D_ 2032-12-10_x000D_ (US20170336412)_x000D_ 2034-10-24_x000D_ (US20…	G01N-033/543/06	C12N-009/10	15	16	60	68	45	(EP3202897)_x000D_ Contracting States: AL AT BE BG CH CY CZ DE DK EE ES FI FR GB GR HR HU IE IS IT LI LT LU LV MC MK MT NL NO PL PT RO RS SE SI SK SM TR_x000D_ (EP2788478)_x000D_ Contracting States: AL AT BE BG CH CY CZ DE DK EE ES FI FR GB GR HR HU IE IS IT LI LT LU LV MC MK MT NL NO PL PT RO RS SE SI SK SM TR_x000D_ (EP2649178)_x000D_ Contracting States: AL AT BE BG CH CY CZ DE DK EE ES FI FR G…	Analysis of biological materials_x000D_ Biotechnology_x000D_ Pharmaceuticals	(EP3202897)_x000D_ GUANINE DNA METHYLTRANSFERASE ENZYME(100,12)_x000D_ RECOMBINANT PROTEIN EXPRESSION(100,7)_x000D_ YIELD(100,3)_x000D_ MGMT BASED(100,1)_x000D_ PROTEIN PRODUCTION ENHANCER(74,2)_x000D_ HAZARDOUS MAMMALIAN PROTEIN(74,1)_x000D_ FUSION POLYPEPTIDE(67,15)_x000D_ EUKARYOTIC PROTEIN POST TRANSLATIONAL MODIFICATION(60,1)_x000D_ HETEROLOGOUS PROTEIN SEQUENCE(51,1)_x000D_ PATIENT FLUID BI…	(EP3202897)_x000D_ The present invention relates to a novel enhancer of protein production in host cells.It discloses a vector for expressing recombinant proteins in these cells, comprising a nucleotide sequence encoding a) a secretion peptidic signal, b) a 6-methylguanine-DNA-methyltransferase enzyme (MGMT, EC 2.1.1.63), a mutant or a catalytic domain thereof, and c) a recombinant protein.Said M…	(EP3202897)_x000D_ Once the heterologous sequence of a protein of interest is cloned herein, such a vector can be advantageously transfected in either vertebrate or nonvertebrate host cells, so as to produce the protein of interest in high amounts._x000D_ Accordingly, the BiP-like signal will be advantageously cleaved once the protein will be translated and secreted in the supernatant of the host…	(EP3202897)_x000D_ 1. In vitro use of a fusion polypeptide comprising a recombinant protein and - the 6-methyl guanine-DNA-methyltransferase enzyme (MGMT, EC 2.1.1.63), or an homologous thereof, whose sequence has at least 70% identity with SEQ ID NO:4 or - the SNAP mutant of SEQ ID NO:2 or an homologous thereof, whose sequence has at least 80% identity with SEQ ID NO:2, as a diagnostic agent for…	(EP3202897)_x000D_ The present invention relates to the field of genetic engineering and molecular biology._x000D_ The present invention relates to a novel enhancer of protein production in host cells._x000D_ More specifically, the invention relates to the following items: 1._x000D_ The present invention relates to the field of genetic engineering and molecular biology._x000D_ In particular, the …	(EP3202897)_x000D_ Search Report references [Examiner]_x000D_ -FLORIAN KAMPMEIER ET AL: "Site-Specific, Covalent Labeling of Recombinant Antibody Fragments via Fusion to an Engineered Version of 6- O -Alkylguanine DNA Alkyltransferase", BIOCONJUGATE CHEMISTRY, vol. 20, no. 5, 20 May 2009 (2009-05-20), pages 1010 - 1015, XP055055532, ISSN: 1043-1802, DOI: 10.1021/bc9000257CC=XP; XP055055532 (Cat. …
64572443	A23L-033/105_x000D_ A61K-009/00/56_x000D_ A61K-009/20/09_x000D_ A61K-009/20/13_x000D_ A61K-009/20/18_x000D_ A61K-009/20/54_x000D_ A61K-009/20/59_x000D_ A61K-009/28/8_x000D_ A61K-031/165_x000D_ A61K-031/357_x000D_ A61K-031/365_x000D_ A61K-031/366_x000D_ A61K-031/4375_x000D_ A61K-031/4741_x000D_ A61K-031/4745_x000D_ A61K-036/185_x000D_ A61K-036/59_x000D_ A61K-045/06_x000D_ B65B-001/00_x000D_ Y02A-0…	A23L-033/105_x000D_ A61K-009/00_x000D_ A61K-009/20_x000D_ A61K-009/28_x000D_ A61K-009/48_x000D_ A61K-009/56_x000D_ A61K-031/165_x000D_ A61K-031/335_x000D_ A61K-031/357_x000D_ A61K-031/365_x000D_ A61K-031/366_x000D_ A61K-031/435_x000D_ A61K-031/4375_x000D_ A61K-031/4741_x000D_ A61K-031/4745_x000D_ A61K-036/185_x000D_ A61K-036/59_x000D_ A61K-045/06_x000D_ A61P-033/06_x000D_ B65B-001/00	Food chemistry_x000D_ Handling_x000D_ Pharmaceuticals	US61/550,969P	2011US-61550969	2011-10-25	2011	(EP2770985)_x000D_ Artemisinin and berberine compositions and methods of making	ROSEN BOB_x000D_ MUEHLER ANDREAS_x000D_ MINTOROVITCH JAN_x000D_ ARORA KARAN_x000D_ PEREZ DAVID_x000D_ PEREZ NICHOLAS ARI_x000D_ CHOKSI TEJAS D		(EP2770985)_x000D_ ROSEN, Bob_x000D_ MUEHLER, Andreas_x000D_ MINTOROVITCH, Jan_x000D_ ARORA, Karan_x000D_ PEREZ, David_x000D_ PEREZ, Nicholas Ari_x000D_ CHOKSI, Tejas D._x000D_ (EP2770985)_x000D_ ROSEN, BOB_x000D_ MUEHLER, ANDREAS_x000D_ MINTOROVITCH, JAN_x000D_ ARORA, KARAN_x000D_ PEREZ, DAVID_x000D_ PEREZ, NICHOLAS ARI_x000D_ CHOKSI, TEJAS D.	U S PHYTOTHERAPY_x000D_ US PHYTOTHERAPY	U S PHYTOTHERAPY_x000D_ US PHYTOTHERAPY	US PHYTOTHERAPY		MINTOROVITCH JAN; FROM 2012-10-22 TO 2012-10-22_x000D_ ROSEN BOB; FROM 2012-10-22 TO 2012-10-22_x000D_ US PHYTOTHERAPY; FROM 2012-10-22_x000D_ CHOKSI TEJAS D; FROM 2012-10-23 TO 2012-10-23_x000D_ MUEHLER ANDREAS; FROM 2012-10-23 TO 2012-10-23_x000D_ ARORA KARAN; FROM 2012-10-23 TO 2012-10-23_x000D_ PEREZ DAVID; FROM 2012-10-23 TO 2012-10-23_x000D_ PEREZ NICHOLAS ARI; FROM 2012-10-23 TO 2012-10-23	(EP2770985)_x000D_ US PHYTOTHERAPY; EFFD=2014-10-01_x000D_ (US9011892)_x000D_ US PHYTOTHERAPY; EFFD=2012-10-25_x000D_ (US9358261)_x000D_ US PHYTOTHERAPY; EFFD=2015-11-04_x000D_ (US9675582)_x000D_ US PHYTOTHERAPY; EFFD=2016-05-05	(EP2770985)_x000D_ U.S. Phytotherapy Inc. ([US])_x000D_ Rosen, Bob ([US])_x000D_ Muehler, Andreas ([US])_x000D_ Mintorovitch, Jan ([US])_x000D_ Arora, Karan ([US])_x000D_ Perez, David ([US])_x000D_ Perez, Nicholas Ari ([US])_x000D_ Choksi, Tejas D. ([US])_x000D_ (EP2770985)_x000D_ U.S. PHYTOTHERAPY INC._x000D_ (US20130102625)_x000D_ U.S. PHYTOTHERAPY, INC. ([US])_x000D_ (US9011892)_x000D_ U.S. Ph…	(EP2770985)_x000D_ Perez, Nicholas Ari; Choksi, Tejas D.; Perez, David; Muehler, Andreas; Arora, Karan; Rosen, Bob; U.S. Phytotherapy Inc.; Mintorovitch, Jan_x000D_ (US20130102625)_x000D_ U.S. PHYTOTHERAPY, INC._x000D_ (US9011892)_x000D_ U.S. Phytotherapy, Inc._x000D_ (US20150148364)_x000D_ U.S. Phytotherapy, Inc._x000D_ (US9186331)_x000D_ U.S. Phytotherapy, Inc._x000D_ (US20160058809)_x000D_ U.S…	CA	CORPORATE	US	(EP2770985)_x000D_ US_x000D_ (US20130102625)_x000D_ US_x000D_ (US9011892)_x000D_ US_x000D_ (US20150148364)_x000D_ US_x000D_ (US9186331)_x000D_ US_x000D_ (US20160058809)_x000D_ US_x000D_ (US9358261)_x000D_ US_x000D_ (US20160250181)_x000D_ US_x000D_ (US9675582)_x000D_ US_x000D_ (WO201363271)_x000D_ US_x000D_ (WO201363271)_x000D_ US_x000D_ (CA2853701)_x000D_ ZZ; US	(EP2770985)_x000D_ NAME=U.S. Phytotherapy Inc. 226 Hillcrest Street , CITY=Orlando, FL 32801 , COUNTRY=US _x000D_ _x000D_ NAME=Rosen, Bob 226 Hillcrest Street , CITY=Orlando, FL 32801 , COUNTRY=US _x000D_ _x000D_ NAME=Muehler, Andreas 6750 West Country Club Lane , CITY=Sarasota, FL 34243 , COUNTRY=US _x000D_ _x000D_ NAME=Mintorovitch, Jan 101 Magnolia Way , CITY=North Haledon, NJ 07508 , COUNTRY=…	(EP2770985)_x000D_ US	(EP2770985)_x000D_ NAME=ROSEN, Bob 226 Hillcrest Street , CITY=Orlando, FL 32801 , COUNTRY=US _x000D_ _x000D_ NAME=MUEHLER, Andreas 6750 West Country Club Lane , CITY=Sarasota, FL 34243 , COUNTRY=US _x000D_ _x000D_ NAME=MINTOROVITCH, Jan 101 Magnolia Way , CITY=North Haledon, NJ 07508 , COUNTRY=US _x000D_ _x000D_ NAME=ARORA, Karan 5337 SW 183rd Avenue , CITY=Miramar, FL 33029 , COUNTRY=US _x000D_…	GRANTED	(EP2770985)_x000D_ LAPSED_x000D_ (US20130102625)_x000D_ GRANTED_x000D_ (US20150148364)_x000D_ GRANTED_x000D_ (US20160058809)_x000D_ GRANTED_x000D_ (US20160250181)_x000D_ GRANTED_x000D_ (WO201363271)_x000D_ LAPSED_x000D_ (CA2853701)_x000D_ PENDING	ALIVE	(EP2770985)_x000D_ DEAD_x000D_ (US20130102625)_x000D_ ALIVE_x000D_ (US20150148364)_x000D_ ALIVE_x000D_ (US20160058809)_x000D_ ALIVE_x000D_ (US20160250181)_x000D_ ALIVE_x000D_ (WO201363271)_x000D_ DEAD_x000D_ (CA2853701)_x000D_ ALIVE	(US9011892)_x000D_ 2015-04-21_x000D_ (US9186331)_x000D_ 2015-11-17_x000D_ (US9358261)_x000D_ 2016-06-07_x000D_ (US9675582)_x000D_ 2017-06-13	(EP2770985)_x000D_ 2017-07-27_x000D_ (US20130102625)_x000D_ 2033-04-04_x000D_ (US20150148364)_x000D_ 2032-10-25_x000D_ (US20160058809)_x000D_ 2035-11-05_x000D_ (US20160250181)_x000D_ 2036-05-06_x000D_ (WO201363271)_x000D_ 2016-04-25_x000D_ (CA2853701)_x000D_ 2032-10-25	A61K-031/366	A61K-031/165	4	5	34	43	7	(EP2770985)_x000D_ Contracting States: AL AT BE BG CH CY CZ DE DK EE ES FI FR GB GR HR HU IE IS IT LI LT LU LV MC MK MT NL NO PL PT RO RS SE SI SK SM TR_x000D_ Extension States: BA ME_x000D_ (WO201363271)_x000D_ National States: AE AG AL AM AO AT AU AZ BA BB BG BH BN BR BW BY BZ CA CH CL CN CO CR CU CZ DE DK DM DO DZ EC EE EG ES FI GB GD GE GH GM GT HN HR HU ID IL IN IS JP KE KG KM KN KP KR KZ LA…	Food chemistry_x000D_ Handling_x000D_ Pharmaceuticals	(US20130102625)_x000D_ ARTEMISININ(100,85)_x000D_ BERBERINE(100,40)_x000D_ NATURAL HERBAL INGREDIENT(100,7)_x000D_ MALARIA PREVENTION(74,5)_x000D_ INFECTED MOSQUITO BI TE(63,1)_x000D_ HELICOBACTER PYLORUS(53,25)_x000D_ DENGUE FEVER(49,20)_x000D_ PROGRESSIVE MULTIFOCAL LEUKOENCEPHALOPATHY(47,41)_x000D_ CHINESE WORMWOOD(45,3)_x000D_ BABESIOSIS(44,23)_x000D_ SPECIES FEMALE MOSQUITO(44,1)_x000D_ WORL…	(EP2770985)_x000D_ An all-natural herbal composition and methods of preparing the same are provided.The novel Artemisinin Combination Therapy (ACT) consists of artemisinin and its derivatives and berberine, the two active substances mixed with various selected excipient compounds to form a single pill, tablet or capsule for treatment and prevention of malaria, dengue fever, yellow fever, dysenter…	(US20130102625)_x000D_ Vaccination is the best way to prevent yellow fever._x000D_ [0036]Artemisinin Combination Therapy (ACT) has been an alternative treatment which shows great promise in its ability to act as a broad-based antibiotic and antiparasitic, especially when dealing with infections that are rising through contamination by fecal matter, as HP is known to be._x000D_ [0101]It would be u…	(US20130102625)_x000D_ 1. An artemisinin and berberine treatment composition for treating a patient in a single pill, tablet or capsule consisting essentially of, in combination: artemisinin; berberine; and at least one binding or delivery component, wherein the composition is useful for treating an adult in a single pill, tablet or capsule, for at least one illness selected from the group compri…	(US20130102625)_x000D_ [0065]The first objective of the present invention is to provide a composition of all-natural herbal ingredients for adults combining artemisinin and berberine formulated to deliver in one single unit or pill a therapeutically effective treatment for malaria, dengue fever, dysentery, yellow fever, Lyme disease, babesiosis, progressive multifocal leukoencephalopathy, Helicob…	(EP2770985)_x000D_ Search Report references [Examiner]_x000D_ -"2011-2012 Product Catalog Leaders in Innovation and Purity", 15 May 2011 (2011-05-15), pages 1 - 116, XP055158780, Retrieved from the Internet <URL:http://www.nutricology.com/proddesc/2011NCcatalog.pdf> [retrieved on 20141215]CC=XP; XP055158780 (Cat. X)_x000D_ -E YARNELL ET AL: "Botanical treatment and prevention of malaria", ALTERNA…
72668775		A01M-001/24_x000D_ E06B-009/52	Civil engineering_x000D_ Other special machines	BR202016005419	2016BR-U005419	2016-03-11	2016	(BR202016005419)_x000D_ WINDOW WITH READY SCREEN IMATADA WITH CAXILHO OF PROTECTION PRE-MONTADO AGAINST THE ENTRANCE OF INSECTS, MOSQUITOS AND MOSQUITOS	OLIVEIRA FRANCISCO VALTER BEZERRA DE		(BR202016005419)_x000D_ OLIVEIRA FRANCISCO VALTER BEZERRA DE	FRANCISCO VALTER BEZERRA DE OLIVEIRA						(BR202016005419)_x000D_ FRANCISCO VALTER BEZERRA DE OLIVEIRA ([BR])_x000D_ (BR202016005419)_x000D_ FRANCISCO VALTER BEZERRA DE OLIVEIRA ([BR])	(BR202016005419)_x000D_ FRANCISCO VALTER BEZERRA DE OLIVEIRA_x000D_ (BR202016005419)_x000D_ FRANCISCO VALTER BEZERRA DE OLIVEIRA	BR	ID	BR	(BR202016005419)_x000D_ BR_x000D_ (BR202016005419)_x000D_ BR	(BR202016005419)_x000D_ NAME=FRANCISCO VALTER BEZERRA DE OLIVEIRA , COUNTRY=BR _x000D_ _x000D_ (BR202016005419)_x000D_ NAME=FRANCISCO VALTER BEZERRA DE OLIVEIRA , COUNTRY=BR _x000D_			PENDING	PENDING	ALIVE	ALIVE		2031-03-11		E06B-009/52	1	0	0	0	1		Civil engineering_x000D_ Other special machines
72702408	C12Q-001/68/6_x000D_ C12Q-001/70/1	C12N-015/11_x000D_ C12Q-001/68_x000D_ C12Q-001/70_x000D_ C12R-001/93	Biotechnology	CN201610099248	2016CN-0099248	2016-02-23	2016	(CN105506188)_x000D_ Fluorescent RT-PCR (reverse transcription-polymerase chain reaction) primer, fluorescent probe, kit and method for detecting Asia-type Zika viruses	HUANG CHAOJIE_x000D_ ZHU HAI_x000D_ YOU TENGFEI_x000D_ FU HUI_x000D_ LU HEHUA	(CN105506188)_x000D_ 黄超杰_x000D_ 朱海_x000D_ 游腾飞_x000D_ 付辉_x000D_ 卢和华	(CN105506188)_x000D_ HUANG CHAOJIE_x000D_ ZHU HAI_x000D_ YOU TENGFEI_x000D_ FU HUI_x000D_ LU HEHUA	SHENZHEN YIRUI BIOLOGICAL TECHNOLOGY	SHENZHEN YIRUI BIOLOGICAL TECHNOLOGY	SHENZHEN YIRUI BIOLOGICAL TECHNOLOGY	(CN105506188)_x000D_ 深圳市易瑞生物技术有限公司			(CN105506188)_x000D_ SHENZHEN BIOEASY BIOTECHNOLOGIES CO., LTD.		CN	CORPORATE	CN					PENDING	PENDING	ALIVE	ALIVE		2036-02-23	C12Q-001/70/1	C12Q-001/70	1	6	0	0	1		Biotechnology	(CN105506188)_x000D_ ASIAN TYPE(100,35)_x000D_ FLUORESCENT PROBE(100,24)_x000D_ KIT(100,24)_x000D_ RT PCR PRIMER(100,20)_x000D_ ASIAN TYPE ZIKA VIRUS(100,7)_x000D_ FLUORESCENT(100,6)_x000D_ FLUORESCENCE ZIKA VIRUS(100,5)_x000D_ FLUORESCENT ZIKA VIRUS(100,3)_x000D_ FLUOROGENIC PROBE(100,1)_x000D_ ZIKA VIRUS(54,17)_x000D_ ZIKA VIRUS EPIDEMIC(48,1)_x000D_ FORWARD PRIMER(37,13)_x000D_ REVERSE PRIMER(…	(CN105506188)_x000D_ The invention provides a fluorescent RT-PCR (reverse transcription-polymerase chain reaction) primer, a fluorescent probe, a kit and a method for detecting Asia-type Zika viruses.The fluorescent RT-PCR primer for detecting the Asia-type Zika viruses includes a forward primer and a reverse primer, the forward primer includes a sequence shown as SEQ ID No:1, and the reverse pri…	(CN105506188)_x000D_ The technical scheme of the present invention provides for a fast, specific detection of the presence of a single tube in the sample asian type Zika virus, as compared with other detection techniques have the following advantages:_x000D_ 4th, the technical scheme of the present invention is used, has the advantage of PCR technology specific fluorescent quantitative fluorescen…	(CN105506188)_x000D_ 1. A method for detecting a fluorescent Zika virus asian type RT-PCR primers and fluorescent probe, characterized in: asian type Zika virus for detecting a fluorescent RT-PCR primers comprising a forward primer and reverse primer, forward primer comprising SEQ IDNO: 1 shown in the sequence, the reverse primer included as SEQ IDNO: 2 shown in Sequence; fluorescent probe is an …	(CN105506188)_x000D_ To address the above technical problem, the present invention provides a means for detecting fluorescence asian type Zika virus by RT-PCR primers and fluorescent probe, a kit and a detection method, it is possible to fast, efficient, qualitatively detect asian type Zika virus in a sample._x000D_ The present invention also discloses a kit for detecting asian type Zika virus, Z…
72728861	A61K-031/704_x000D_ A61K-039/00_x000D_ A61K-039/395_x000D_ A61K-039/395/5_x000D_ A61K-039/395/58_x000D_ A61K-045/06_x000D_ A61K-2039/505_x000D_ C07K-016/00_x000D_ C07K-016/18_x000D_ C07K-016/24/1_x000D_ C07K-016/30_x000D_ C07K-016/30/15_x000D_ C07K-016/30/3_x000D_ C07K-016/30/69_x000D_ C07K-016/32_x000D_ C07K-016/40_x000D_ C07K-016/42_x000D_ C07K-016/42/41_x000D_ C07K-016/46/8_x000D_ C07K-2317/22…	A61K-039/00_x000D_ A61K-039/395_x000D_ A61K-045/00_x000D_ A61K-045/06_x000D_ A61P-035/00_x000D_ C07K_x000D_ C07K-016/00_x000D_ C07K-016/18_x000D_ C07K-016/24_x000D_ C07K-016/30_x000D_ C07K-016/32_x000D_ C07K-016/40_x000D_ C07K-016/42_x000D_ C07K-016/46_x000D_ C12N-001/15_x000D_ C12N-001/19_x000D_ C12N-001/21_x000D_ C12N-005/10_x000D_ C12N-015/00_x000D_ C12N-015/12_x000D_ C12N-015/13_x000D_ C12Q-0…	Analysis of biological materials_x000D_ Biotechnology_x000D_ Pharmaceuticals	US62/067,908P	2014US-62067908	2014-10-23	2014	(EP3209685)_x000D_ Single domain antibodies directed against intracellular antigens	SINGH SUNANDA	(JP2017538671)_x000D_ シン、シュナンダ	(EP3209685)_x000D_ SINGH, Sunanda_x000D_ (EP3209685)_x000D_ SINGH, Sunanda	SINGH BIOTECHNOLOGY_x000D_ SINGH MOLECULAR MEDICINE_x000D_ THING BIOTECHNOLOGY	SINGH BIOTECHNOLOGY_x000D_ SINGH MOLECULAR MEDICINE_x000D_ THING BIOTECHNOLOGY	SINGH MOLECULAR MEDICINE	(JP2017538671)_x000D_ シング バイオテクノロジー、エルエルシー_x000D_ Reg. Nb: 517136896	SINGH SUNANDA DR; FROM 2015-10-23 TO 2015-11-23_x000D_ SINGH BIOTECHNOLOGY; FROM 2015-11-23	(US20160115247)_x000D_ SINGH BIOTECHNOLOGY FLORIDA; EFFD=2015-11-23_x000D_ (US9546211)_x000D_ SINGH MOLECULAR MEDICINE FLORIDA; EFFD=2015-11-23_x000D_ (US9663570)_x000D_ SINGH MOLECULAR MEDICINE FLORIDA; EFFD=2015-11-23_x000D_ (US9695234)_x000D_ SINGH MOLECULAR MEDICINE FLORIDA; EFFD=2015-11-23_x000D_ (US20170267784)_x000D_ SINGH BIOTECHNOLOGY FLORIDA; EFFD=2018-06-20_x000D_ (US9850321)_x000D_ SI…	(EP3209685)_x000D_ Singh Biotechnology, LLC ([US])_x000D_ (EP3209685)_x000D_ Singh Biotechnology, LLC_x000D_ (US20160115247)_x000D_ SINGH BIOTECHNOLOGY, LLC ([US])_x000D_ (US20160115226)_x000D_ SINGH MOLECULAR MEDICINE, LLC ([US])_x000D_ (US9546211)_x000D_ SINGH MOLECULAR MEDICINE, LLC ([US])_x000D_ (US20160115244)_x000D_ SINGH MOLECULAR MEDICINE, LLC ([US])_x000D_ (US9663570)_x000D_ Singh Molecu…	(EP3209685)_x000D_ Singh Biotechnology, LLC_x000D_ (US20160115247)_x000D_ SINGH BIOTECHNOLOGY, LLC_x000D_ (US20160115226)_x000D_ SINGH MOLECULAR MEDICINE, LLC_x000D_ (US9546211)_x000D_ SINGH MOLECULAR MEDICINE, LLC_x000D_ (US20160115244)_x000D_ SINGH MOLECULAR MEDICINE, LLC_x000D_ (US9663570)_x000D_ Singh Molecular Medicine, LLC_x000D_ (US20160115248)_x000D_ SINGH MOLECULAR MEDICINE, LLC_x000D_ (…	AU	CORPORATE	US	(EP3209685)_x000D_ US_x000D_ (US20160115247)_x000D_ US_x000D_ (US20160115226)_x000D_ US_x000D_ (US9546211)_x000D_ US_x000D_ (US20160115244)_x000D_ US_x000D_ (US9663570)_x000D_ US_x000D_ (US20160115248)_x000D_ US_x000D_ (US9695234)_x000D_ US_x000D_ (US20170267784)_x000D_ US_x000D_ (US20170327598)_x000D_ US_x000D_ (US9850321)_x000D_ US_x000D_ (US20180072815)_x000D_ US_x000D_ (WO201665323)_x000D_ US…	(EP3209685)_x000D_ NAME=Singh Biotechnology, LLC 14153 Yosemite Drive, Suite 101 , CITY=Hudson, Florida 34667 , COUNTRY=US _x000D_ _x000D_ (US20160115247)_x000D_ NAME=SINGH BIOTECHNOLOGY, LLC , CITY=Tampa , STATE=FL , COUNTRY=US , ATYP=US Company _x000D_ _x000D_ (US20160115226)_x000D_ NAME=SINGH MOLECULAR MEDICINE, LLC , CITY=Tampa , STATE=FL , COUNTRY=US , ATYP=US Company _x000D_ _x000D_ (US9546…	(EP3209685)_x000D_ US	(EP3209685)_x000D_ NAME=SINGH, Sunanda 4708 Rue Bordeaux , CITY=Lutz, Florida 33558 , COUNTRY=US _x000D_	GRANTED	(EP3209685)_x000D_ PENDING_x000D_ (US20160115247)_x000D_ LAPSED_x000D_ (US20160115226)_x000D_ GRANTED_x000D_ (US20160115244)_x000D_ GRANTED_x000D_ (US20160115248)_x000D_ GRANTED_x000D_ (US20170267784)_x000D_ PENDING_x000D_ (US20170327598)_x000D_ GRANTED_x000D_ (US20180072815)_x000D_ PENDING_x000D_ (WO201665323)_x000D_ PENDING_x000D_ (JP2017538671)_x000D_ PENDING_x000D_ (CA2962275)_x000D_ PENDING_…	ALIVE	(EP3209685)_x000D_ ALIVE_x000D_ (US20160115247)_x000D_ DEAD_x000D_ (US20160115226)_x000D_ ALIVE_x000D_ (US20160115244)_x000D_ ALIVE_x000D_ (US20160115248)_x000D_ ALIVE_x000D_ (US20170267784)_x000D_ ALIVE_x000D_ (US20170327598)_x000D_ ALIVE_x000D_ (US20180072815)_x000D_ ALIVE_x000D_ (WO201665323)_x000D_ ALIVE_x000D_ (JP2017538671)_x000D_ ALIVE_x000D_ (CA2962275)_x000D_ ALIVE_x000D_ (TW201615834)_x…	(US9546211)_x000D_ 2017-01-17_x000D_ (US9663570)_x000D_ 2017-05-30_x000D_ (US9695234)_x000D_ 2017-07-04_x000D_ (US9850321)_x000D_ 2017-12-26_x000D_ (KR101831123)_x000D_ 2018-02-22	(EP3209685)_x000D_ 2035-10-23_x000D_ (US20160115247)_x000D_ 2017-03-28_x000D_ (US20160115226)_x000D_ 2035-10-23_x000D_ (US20160115244)_x000D_ 2035-10-23_x000D_ (US20160115248)_x000D_ 2035-10-23_x000D_ (US20170267784)_x000D_ 2037-05-30_x000D_ (US20170327598)_x000D_ 2037-05-30_x000D_ (US20180072815)_x000D_ 2037-11-27_x000D_ (WO201665323)_x000D_ 2018-10-16_x000D_ (JP2017538671)_x000D_ 2035-10-23_x00…	C07K-016/46/8	C07K-016/46	12	1	38	26	19	(EP3209685)_x000D_ Contracting States: AL AT BE BG CH CY CZ DE DK EE ES FI FR GB GR HR HU IE IS IT LI LT LU LV MC MK MT NL NO PL PT RO RS SE SI SK SM TR_x000D_ Extension States: BA ME_x000D_ (WO201665323)_x000D_ National States: AE AG AL AM AO AT AU AZ BA BB BG BH BN BR BW BY BZ CA CH CL CN CO CR CU CZ DE DK DM DO DZ EC EE EG ES FI GB GD GE GH GM GT HN HR HU ID IL IN IR IS JP KE KG KN KP KR KZ LA…	Analysis of biological materials_x000D_ Biotechnology_x000D_ Pharmaceuticals	(US20160115247)_x000D_ SINGLE DOMAIN ANTIBODY(100,8)_x000D_ INTRACELLULAR ANTIGEN(100,1)_x000D_ INTRACELLULAR MOLECULE OVEREXPRESSION(82,1)_x000D_ EXOGENOUS TARGETING SEQUENCE(71,4)_x000D_ INTRACELLULAR COMPONENT(68,11)_x000D_ QUANTITATIVE IMMUNOASSAY(62,4)_x000D_ BACTERIAL INDUCED COLITIS(62,1)_x000D_ SDAB DOMAIN(59,2)_x000D_ DERMATOLOGICAL DISEASE(54,1)_x000D_ PADGET DISEASE(51,1)_x000D_ TRAUMA…	(EP3209685)_x000D_ This invention provides compositions and methods to treat a condition or disease without the use of exogenous targeting sequences or chemical compositions.The present invention relates to single-domain antibodies (sdAbs), proteins and polypeptides comprising the sdAbs that are directed against intracellular components that cause a condition or disease.The invention also include…	(US20160115226)_x000D_ [0006] For the foregoing reasons, there is a need for compositions and methods to treat or prevent a disease that do not rely on exogenous targeting sequences or chemical compositions in order to enter the cell, and that are effective in targeting only the affected cells in the body._x000D_ [0004] There are a number of diseases or conditions, such as cancer, that are caused…	(US20160115226)_x000D_ 1. An anti-TNF-alpha single domain antibody (sdAb)._x000D_ 9. An isolated polypeptide, the isolated polypeptide comprising an aminoacid sequence as set forth in SEQ ID NO:45, SEQ ID NO:46 or SEQ ID NO:47._x000D_ 11. A method of measuring the levels of an anti-TNF-alpha sdAb in a sample from a subject, the method comprising the steps of: a) generating a mouse monoclonal anti…	(US20160115226)_x000D_ [0007] The present invention relates to single-domain antibodies (sdAbs), proteins and polypeptides comprising the sdAbs._x000D_ This invention provides compositions and methods to treat a condition or disease without the use of exogenous targeting sequences or chemical compositions._x000D_ The present invention relates to single-domain antibodies (sdAbs), proteins and poly…	(EP3209685)_x000D_ Search Report references [Examiner]_x000D_ -T. LI ET AL: "Cell-penetrating anti-GFAP VHH and corresponding fluorescent fusion protein VHH-GFP spontaneously cross the blood-brain barrier and specifically recognize astrocytes: application to brain imaging", THE FASEB JOURNAL, vol. 26, no. 10, 22 June 2012 (2012-06-22), pages 3969 - 3979, XP055168396, ISSN: 0892-6638, DOI: 10.1096…
72732126		A01M-001/22	Other special machines	BR102016002343	2016BR-0002343	2016-02-02	2016	(BR102016002343)_x000D_ ELECTRIC SCREEN BUSH MOSQUITOS AND INSECTS FOR WINDOWS AND DOORS	JOÃO PAULO TORRES DE LIMA GONÇALVES		(BR102016002343)_x000D_ JOÃO PAULO TORRES DE LIMA GONÇALVES	JOAO PAULO TORRES DE LIMA GONCALVES						(BR102016002343)_x000D_ JOÃO PAULO TORRES DE LIMA GONÇALVES ([BR])_x000D_ (BR102016002343)_x000D_ JOÃO PAULO TORRES DE LIMA GONÇALVES	(BR102016002343)_x000D_ JOÃO PAULO TORRES DE LIMA GONÇALVES	BR	ID	BR	(BR102016002343)_x000D_ BR	(BR102016002343)_x000D_ NAME=JOÃO PAULO TORRES DE LIMA GONÇALVES , COUNTRY=BR _x000D_			PENDING	PENDING	ALIVE	ALIVE		2036-02-02		A01M-001/22	1	0	0	0	1		Other special machines		(BR102016002343)_x000D_ tela elétrica mata mosquitos e insetos para janelas e portas a presente patente de invenção tem por objetivo matar mosquitos e demais insetos domésticos, através da liberação de uma pequena descarga elétrica no momento em que o dito inseto toca na tela. com isto, elimina-se quase a totalidade dos insetos voadores (especialmente mosquitos aedes aegypti transmissor de dengue…
72732571		A01N-025/04_x000D_ A01N-065/26_x000D_ A01P-007/04	Basic materials chemistry	BR102016002125	2016BR-0002125	2016-01-29	2016	(BR102016002125)_x000D_ PRODUCTION OF COLLOIDAL SYSTEM AUTOMICROEMULSIFICANTE THE AZADIRACHTA OIL BASE INDICATES. THE JUSS. FOR BIODISPONIBILIZAÇAO IN THE CONTROL OF PLAGUES	DENISE PORFIRIO EMERENCIANO_x000D_ HUGO ALEXANDRE DE OLIVEIRA ROCHA_x000D_ MARIA APARECIDA MEDEIROS MACIEL_x000D_ MARIA DE FÁTIMA VITÓRIA DE MOURA_x000D_ MAXSUELL LUCAS MENDES MARQUES		(BR102016002125)_x000D_ DENISE PORFIRIO EMERENCIANO_x000D_ HUGO ALEXANDRE DE OLIVEIRA ROCHA_x000D_ MARIA APARECIDA MEDEIROS MACIEL_x000D_ MARIA DE FÁTIMA VITÓRIA DE MOURA_x000D_ MAXSUELL LUCAS MENDES MARQUES	MARIA APARECIDA MEDEIROS MACIEL						(BR102016002125)_x000D_ MARIA APARECIDA MEDEIROS MACIEL ([BR])_x000D_ (BR102016002125)_x000D_ MARIA APARECIDA MEDEIROS MACIEL	(BR102016002125)_x000D_ MARIA APARECIDA MEDEIROS MACIEL	BR	ID	BR	(BR102016002125)_x000D_ BR	(BR102016002125)_x000D_ NAME=MARIA APARECIDA MEDEIROS MACIEL , COUNTRY=BR _x000D_			PENDING	PENDING	ALIVE	ALIVE		2036-01-29		A01P-007/04	1	0	0	0	1		Basic materials chemistry		(BR102016002125)_x000D_ no presente invento obteve-se um produto coloidal biodegradável do tipo automicroemulsificante (smedds) a base de o óleo das sementes de azadirachta indica a. juss., objetivando ação praguicida ou controle de proliferação de pragas, como mosquitos que transmitem as seguintes doenças: dengue, zika vírus, chikungunya, malária, filariose e febre amarela. o novo sistema smedds…
72799632		A01K-067/033_x000D_ C12N-015/113	Biotechnology_x000D_ Other special machines	BR102015009165	2015BR-0009165	2015-04-23	2015	(BR102015009165)_x000D_ ANCESTRIES [TRANSGENICAS] OF MOSQUITOS, VECTOR, METHOD FOR ATTAINMENT OF ANCESTRIES [TRANSGENICAS] OF MOSQUITOS, METHOD FOR POPULATION CONTROL OF MOSQUITOS AND METHOD FOR CONTROL OF TRANSMISSION OF DISEASES	SILVA ANDRÉ LUIS DA COSTA DA_x000D_ CARVALHO DANILO OLIVEIRA_x000D_ ARAÚJO HELENA ROCHA CORRÊA DE_x000D_ GUIMARÃES MARGARETH DE LARA CAPURRO		(BR102015009165)_x000D_ ANDRÉ LUIS DA COSTA DA SILVA_x000D_ DANILO OLIVEIRA CARVALHO_x000D_ HELENA ROCHA CORRÊA DE ARAÚJO_x000D_ MARGARETH DE LARA CAPURRO GUIMARÃES	BIOFÁBRICA MOSCAMED BRASIL	BIOFÁBRICA MOSCAMED BRASIL	BIOFÁBRICA MOSCAMED BRASIL				(BR102015009165)_x000D_ BIOFÁBRICA MOSCAMED BRASIL ([BR])_x000D_ (BR102015009165)_x000D_ BIOFÁBRICA MOSCAMED BRASIL	(BR102015009165)_x000D_ BIOFÁBRICA MOSCAMED BRASIL_x000D_ (BR102015009165)_x000D_ BIOFÁBRICA MOSCAMED BRASIL	BR	CORPORATE	BR	(BR102015009165)_x000D_ BR	(BR102015009165)_x000D_ NAME=BIOFÁBRICA MOSCAMED BRASIL , COUNTRY=BR _x000D_ _x000D_ (BR102015009165)_x000D_ NAME=BIOFÁBRICA MOSCAMED BRASIL AV. C1 Nº 992, QUADRA D13, LOTE 15, DISTRITO INDUSTRIAL 48908000 JUAZEIRO BR _x000D_		(BR102015009165)_x000D_ NAME=ANDRÉ LUIS DA COSTA DA SILVA RUA MUNHOZ DE MELO, Nº 480, APTO 21C, JARDIM DANFER 03729030 SÃO PAULO BR _x000D_ _x000D_ NAME=DANILO OLIVEIRA CARVALHO ROD. RAPOSO TAVARES, Nº 3175, JD. ARPOADOR 05577100 SÃO PAULO BR _x000D_ _x000D_ NAME=HELENA ROCHA CORRÊA DE ARAÚJO RUA RODÉSIA, Nº 94, APTO 34 - SUMAREZINHO 05435020 SÃO PAULO BR _x000D_ _x000D_ NAME=MARGARETH DE LARA CA…	REVOKED	REVOKED	DEAD	DEAD		2018-06-19		A01K-067/033	1	0	0	0	1		Biotechnology_x000D_ Other special machines		(BR102015009165)_x000D_ resumo linhagens transgênicas de mosquitos, vetor, método para obtenção de linhagens transgênicas de mosquitos, método para controle populacional de mosquitos e método para controle de transmissão de doenças a presente invenção refere-se linhagens transgênicas de mosquitos, particularmente aedes aegypti, aedes albopictus, aedes polynesiensis, culex quinquefasciatus, bem co…
72802256	A01N-065/26_x000D_ Y02A-050/328_x000D_ Y02A-050/329_x000D_ Y02A-050/33	A01N-025/12_x000D_ A01N-065/26_x000D_ A01P-007/04	Basic materials chemistry	BR102016008090	2016BR-0008090	2016-04-12	2016	(WO2017177294)_x000D_ Natural insecticide	CAMARA ADRIANA LEANDRO_x000D_ COSTA MARIA CELIA PIRES_x000D_ E SILVA MAMEDE CHAVES_x000D_ BORGES ANTONIO CARLOS ROMAO_x000D_ MARINHO PAULA EILLANNY SILVA_x000D_ DA SILVA KATIUSSIA PINHO_x000D_ GOMES THAIS MOTA_x000D_ DE OLIVEIRA ANA CATHARINNY DA SILVA_x000D_ DA SILVA MICHAEL JACKSON FERREIRA		(WO2017177294)_x000D_ CAMARA, Adriana Leandro_x000D_ COSTA, Maria Celia Pires_x000D_ E SILVA, Mamede Chaves_x000D_ BORGES, Antonio Carlos Romao_x000D_ MARINHO, Paula Eillanny Silva_x000D_ DA SILVA, Katiussia Pinho_x000D_ GOMES, Thais Mota_x000D_ DE OLIVEIRA, Ana Catharinny Da Silva_x000D_ DA SILVA, Michael Jackson Ferreira	UNIVERSIDADE FEDERAL DO MARANHAO_x000D_ UNIVERSITY FEDERAL DO MARANHAO	UNIVERSIDADE FEDERAL DO MARANHAO_x000D_ UNIVERSITY FEDERAL DO MARANHAO	UNIVERSITY FEDERAL DO MARANHAO				(WO2017177294)_x000D_ UNIVERSIDADE FEDERAL DO MARANHÃO ([BR])_x000D_ (BR102016008090)_x000D_ UNIVERSIDADE FEDERAL DO MARANHÃO ([BR])_x000D_ (BR102016008090)_x000D_ UNIVERSIDADE FEDERAL DO MARANHÃO	(WO2017177294)_x000D_ UNIVERSIDADE FEDERAL DO MARANHÃO_x000D_ (BR102016008090)_x000D_ UNIVERSIDADE FEDERAL DO MARANHÃO	BR	ACADEMY	BR	(WO2017177294)_x000D_ BR_x000D_ (BR102016008090)_x000D_ BR	(WO2017177294)_x000D_ NAME=UNIVERSIDADE FEDERAL DO MARANHÃO Av. dos Portugueses, 1966 - Cidade Universitaria, Bacanga 65080-805 Sao Luis - MA , POSTCODE=65080-805 , COUNTRY=BR _x000D_ _x000D_ (BR102016008090)_x000D_ NAME=UNIVERSIDADE FEDERAL DO MARANHÃO , COUNTRY=BR _x000D_	(WO2017177294)_x000D_ BR	(WO2017177294)_x000D_ NAME=CAMARA, Adriana Leandro Avenida B, Quadra 03, Casa 20, Maranhao Novo 65061-250 Sao Luis - MA , POSTCODE=65061-250 , COUNTRY=BR _x000D_ _x000D_ NAME=COSTA, Maria Celia Pires Rua das Figueiras, Quadra 1, Nº 5, Apto. 502, Condominio Rio do Vale, Sao Francisco 65076-150 Sao Luis - MA , POSTCODE=65076-150 , COUNTRY=BR _x000D_ _x000D_ NAME=E SILVA, Mamede Chaves Rua 14, Quadr…	PENDING	(WO2017177294)_x000D_ PENDING_x000D_ (BR102016008090)_x000D_ PENDING	ALIVE	(WO2017177294)_x000D_ ALIVE_x000D_ (BR102016008090)_x000D_ ALIVE		(WO2017177294)_x000D_ 2019-10-12_x000D_ (BR102016008090)_x000D_ 2036-04-12	A01N-065/26	A01N-065/26	2	0	1	12	2	(WO2017177294)_x000D_ National States: AE AG AL AM AO AT AU AZ BA BB BG BH BN BR BW BY BZ CA CH CL CN CO CR CU CZ DE DJ DK DM DO DZ EC EE EG ES FI GB GD GE GH GM GT HN HR HU ID IL IN IR IS JP KE KG KH KN KP KR KW KZ LA LC LK LR LS LU LY MA MD ME MG MK MN MW MX MY MZ NA NG NI NO NZ OM PA PE PG PH PL PT QA RO RS RU RW SA SC SD SE SG SK SL SM ST SV SY TH TJ TM TN TR TT TZ UA UG US UZ VC VN ZA ZM ZW_…	Basic materials chemistry	(WO2017177294)_x000D_ NATURAL INSECTICIDE(100,26)_x000D_ NEEM LEAVE PASTE(77,10)_x000D_ NEEM LEAVE CONCENTRATED EXTRACT(68,8)_x000D_ DISEASE ERADICATION(53,1)_x000D_ AZADIRACHTA INDICA(52,16)_x000D_ NEEM LEAVE HYDROALCOHOLIC EXTRACT(47,2)_x000D_ NEEM LEAVE(42,4)_x000D_ NEEM LEAVE POWDER(42,4)_x000D_ CHEWING BEETLE(39,4)_x000D_ AEDES AEGYPTI(37,4)_x000D_ STARCHY AGENT(36,2)_x000D_ IML III(34,1)_x0…	(WO2017177294)_x000D_ The present invention relates to a Natural Insecticide, based on the Neem Leaves (Azadirachta indica A.Juss) with application in the field of chemical industries that produce insecticides that can be used to eliminate, naturally, mosquitoes of the species Aedes sp., Anopheles sp., Culex sp. and, especially, the Aedes aegypti in its different phases of development, aiming at …	(WO2017177294)_x000D_ Juss) with application in the field of chemical industries that produce insecticides that can be used to eliminate, naturally, mosquitoes of the species Aedes sp., Anopheles sp., Culex sp. and , especially, the Aedes aegypti in its different phases of development, aiming at the eradication of several diseases, such as Yellow Fever, Dengue, Chikungunya and Zika in Brazil and …	(WO2017177294)_x000D_ 1 . Natural insecticide, characterized by contain the following formulation: i. Neem Leaves Paste {Azadirachta indica A. Juss) 1 to 250 g ii. Preservative 0 to 5 imL iii. Carrier q.s. 1 L_x000D_ 5. Natural Insecticide, characterized in that it is in the form of a Neem soluble granulate containing from 0.1 to 25% of the Neem Leaves Paste {Azadirachta indica A. Juss) and one o…	(WO2017177294)_x000D_ [001 ] The present invention relates to a Natural Insecticide, based on the Neem Leaves {Azadirachta indica A._x000D_ [007] The present invention consists of a Natural Insecticide which contains the following formulation: Neem {Azadirachta indica A._x000D_ [007] The present invention consists of a Natural Insecticide which contains the following formulation: Neem {Azadiracht…	(WO2017177294)_x000D_ International Search Report [Examiner]_x000D_ -MARCOMINI, A. M.: "M. Sc. Dissertation", 26 November 2009, SAO PAULO UNIVERSITY, article "Bioatividade e efeito residual de nanoformulações de nim sobre Spodoptera frugiperda" (Cat. X)_x000D_ -MARTINEZ, S. S.: "O Nim -Azadirachta indica - um Inseticida Natural", PARAND AGRONOMIC INSTITUTE - IAPAR, 20 February 2008 (2008-02-20), …
73231389	A61K-039/12_x000D_ C07K-014/18_x000D_ C12N-015/66_x000D_ G01N-033/53_x000D_ Y02A-050/386_x000D_ Y02A-050/392_x000D_ Y02A-050/53	A61K-039/12_x000D_ C07K-014/18_x000D_ C12N-015/33_x000D_ C12N-015/40_x000D_ C12N-015/49_x000D_ C12N-015/66_x000D_ G01N-033/53_x000D_ G01N-033/569	Analysis of biological materials_x000D_ Biotechnology_x000D_ Pharmaceuticals	BR102016011318	2016BR-0011318	2016-05-18	2016	(WO2017197477)_x000D_ Nucleic acid sequence, recombinant antigen, diagnostic kits and uses thereof	FERREIRA LUÍS CARLOS DE SOUZA_x000D_ ALVES RÚBENS PRINCE DOS SANTOS_x000D_ PEREIRA LENNON RAMOS_x000D_ SANTOS ROBERT ANDREATA		(WO2017197477)_x000D_ FERREIRA, Luís Carlos De Souza_x000D_ ALVES, Rúbens Prince Dos Santos_x000D_ PEREIRA, Lennon Ramos_x000D_ SANTOS, Robert Andreata	UNIVERSIDADE DE SAO PAULO - USP	UNIVERSIDADE DE SAO PAULO - USP	UNIVERSIDADE DE SAO PAULO - USP				(WO2017197477)_x000D_ UNIVERSIDADE DE SÃO PAULO-USP ([BR])_x000D_ (BR102016011318)_x000D_ UNIVERSIDADE DE SÃO PAULO - USP ([BR])_x000D_ (BR102016011318)_x000D_ UNIVERSIDADE DE SÃO PAULO - USP	(WO2017197477)_x000D_ UNIVERSIDADE DE SÃO PAULO-USP_x000D_ (BR102016011318)_x000D_ UNIVERSIDADE DE SÃO PAULO - USP	BR	ACADEMY	BR	(WO2017197477)_x000D_ BR_x000D_ (BR102016011318)_x000D_ BR	(WO2017197477)_x000D_ NAME=UNIVERSIDADE DE SÃO PAULO-USP RUA DA REITORIA, 374 - BUTANTÃ CEP-05508220 SÃO PAULO - SP , POSTCODE=05508220 , COUNTRY=BR _x000D_ _x000D_ (BR102016011318)_x000D_ NAME=UNIVERSIDADE DE SÃO PAULO - USP , COUNTRY=BR _x000D_	(WO2017197477)_x000D_ BR	(WO2017197477)_x000D_ NAME=FERREIRA, Luís Carlos De Souza RUA DIONÍSIO MURCOVIC, 395 CEP-06030370 OSASCO , POSTCODE=06030370 , COUNTRY=BR _x000D_ _x000D_ NAME=ALVES, Rúbens Prince Dos Santos RUA BARÃO DO TATUÍ, 78 - APTO. 22 CEP-01226030 SÃO PAULO , POSTCODE=01226030 , COUNTRY=BR _x000D_ _x000D_ NAME=PEREIRA, Lennon Ramos RUA DOUTOR ARTHUR NEIVA, 56 CEP-05359200 SÃO PAULO , POSTCODE=05359200 , CO…	PENDING	(WO2017197477)_x000D_ PENDING_x000D_ (BR102016011318)_x000D_ PENDING	ALIVE	(WO2017197477)_x000D_ ALIVE_x000D_ (BR102016011318)_x000D_ ALIVE		(WO2017197477)_x000D_ 2019-11-18_x000D_ (BR102016011318)_x000D_ 2036-05-18	A61K-039/12	C12N-015/33	2	0	0	12	2	(WO2017197477)_x000D_ National States: AE AG AL AM AO AT AU AZ BA BB BG BH BN BR BW BY BZ CA CH CL CN CO CR CU CZ DE DJ DK DM DO DZ EC EE EG ES FI GB GD GE GH GM GT HN HR HU ID IL IN IR IS JP KE KG KH KN KP KR KW KZ LA LC LK LR LS LU LY MA MD ME MG MK MN MW MX MY MZ NA NG NI NO NZ OM PA PE PG PH PL PT QA RO RS RU RW SA SC SD SE SG SK SL SM ST SV SY TH TJ TM TN TR TT TZ UA UG US UZ VC VN ZA ZM ZW_…	Analysis of biological materials_x000D_ Biotechnology_x000D_ Pharmaceuticals	(WO2017197477)_x000D_ RECOMBINANT ANTIGEN(100,13)_x000D_ TRUNCATED PROTEIN(100,1)_x000D_ RNA ENVELOPADO VIRUS(96,1)_x000D_ JAPANESE ENCEPHALITIS SEROCOMPLEX VIRUS(83,1)_x000D_ RECOMBINANT ANTIGEN IDENTIFICATION(80,1)_x000D_ ZOONOTIC FLAVIVIRUS(79,1)_x000D_ DIAGNOSIS KIT(73,5)_x000D_ DISEASE CONVALESCENCIA(69,1)_x000D_ DIAGNOSIS SOROLOGICO KIT(68,1)_x000D_ RECOMBINANT FRAGMENT DISCRIMINATORY CAPAC…	(WO2017197477)_x000D_ The present invention describes a recombinant antigen derived from the non-structural protein 1 of ZIKV ((ΔN-NS1) capable of specifically differentiating antibodies generated after infection with ZIKV from antibodies generated after infection with dengue virus (DENV) or other flaviviruses.In addition, the present invention describes the assembly of sorological diagnostic kit…	(WO2017197477)_x000D_ [002] Flavivirus is a group of more than 70 types of envelopados viruses of RNA that they cause you would be diseases in animal humans and._x000D_ [006] Short of markers of beginning of the infection for some flavivirus had returned possible the development of tests fast ones for detention, exactly in the acute phase of disease (HOBSON-PETERS, J. (2012) Approaches will be th…	(WO2017197477)_x000D_ 1. Sequence of I acidify nucleico isolated that codifies characterized truncated protein ZIKV it fact to understand the SEQ. ID. 1.	(WO2017197477)_x000D_ The invention presents the identification of a recombinant antigen capable to differentiate, of specific form, antibodies generated after the infection it ZIKV and to differentiate them of antibodies generated after infection with DENV and others flavivirus._x000D_ [001] The present invention is inserted in the field of the medicine, more precisely in the area of the sorolog…
73352260		A61K-031/7056_x000D_ A61K-031/7072_x000D_ A61P-031/14	Pharmaceuticals	BR102016012517	2016BR-0012517	2016-06-01	2016	(BR102016012517)_x000D_ COMPOSED ANTIVIRAL, PHARMACEUTICAL COMPOSITION ANTIVIRAL, USE OF THE COMPOSITION AND METHOD OF TREATMENT	ANA MARIA BISPO DE FILIPPIS_x000D_ CAROLINA DE QUEIROZ SACRAMENTO_x000D_ FERNANDO AUGUSTO BOZZA_x000D_ GABRIELLE RODRIGUES DE MELO_x000D_ JAIME ALBERTO RABI NALLAR_x000D_ KARIN BRÜNING_x000D_ LUCAS VILLAS BÔAS HOELZ_x000D_ NATÁLIA FINTELMAN RODRIGUES_x000D_ NUBIA BOECHAT ANDRADE_x000D_ PATRICIA TORRES BOZZA_x000D_ RITA MARIA RIBEIRO NOGUEIRA_x000D_ SERGIO JOSE FRANGIONI_x000D_ THIAGO MORENO LOPES…		(BR102016012517)_x000D_ ANA MARIA BISPO DE FILIPPIS_x000D_ CAROLINA DE QUEIROZ SACRAMENTO_x000D_ FERNANDO AUGUSTO BOZZA_x000D_ GABRIELLE RODRIGUES DE MELO_x000D_ JAIME ALBERTO RABI NALLAR_x000D_ KARIN BRÜNING_x000D_ LUCAS VILLAS BÔAS HOELZ_x000D_ NATÁLIA FINTELMAN RODRIGUES_x000D_ NUBIA BOECHAT ANDRADE_x000D_ PATRICIA TORRES BOZZA_x000D_ RITA MARIA RIBEIRO NOGUEIRA_x000D_ SERGIO JOSE FRANGIONI_x0…	CARLOS MEDICIS MOREL_x000D_ CONSÓRCIO BMK	CARLOS MEDICIS MOREL_x000D_ CONSÓRCIO BMK	CARLOS MEDICIS MOREL_x000D_ CONSÓRCIO BMK			(BR102016012517)_x000D_ CARLOS MEDICIS MOREL CONSORCIO BMK; EFFD=2018-05-29	(BR102016012517)_x000D_ CARLOS MEDICIS MOREL ([BR])_x000D_ CONSÓRCIO BMK ([BR])_x000D_ (BR102016012517)_x000D_ CARLOS MEDICIS MOREL_x000D_ CONSÓRCIO BMK	(BR102016012517)_x000D_ CARLOS MEDICIS MOREL; CONSÓRCIO BMK	BR	ID;CORPORATE	BR	(BR102016012517)_x000D_ BR	(BR102016012517)_x000D_ NAME=CARLOS MEDICIS MOREL , COUNTRY=BR _x000D_ _x000D_ NAME=CONSÓRCIO BMK , COUNTRY=BR _x000D_			PENDING	PENDING	ALIVE	ALIVE		2036-06-01		A61K-031/7056	1	0	0	0	1		Pharmaceuticals		(BR102016012517)_x000D_ to present invention one mentions to composites analogous selected antivirals of the group of inhibiting nucleosídeos/nucleotídeos of rna dependent viral polymerase of rna, or its you leave, solvates, derivatives or pro-drugs, or same combinations of said composites, for the prophylactic treatment, dressing or mitigador of the infection for virus zika (zikv) and for the tr…
73406976		A01M-005/02	Other special machines	BR102016013615	2016BR-0013615	2016-06-13	2016	(BR102016013615)_x000D_ DISPOSITIVE EXTERMINATOR OF LARVAE OF MOSQUITOS	DEURILAN ALVES DE SOUZA VIEIRA		(BR102016013615)_x000D_ DEURILAN ALVES DE SOUZA VIEIRA	DEURILAN ALVES DE SOUZA VIEIRA						(BR102016013615)_x000D_ DEURILAN ALVES DE SOUZA VIEIRA ([BR])_x000D_ (BR102016013615)_x000D_ DEURILAN ALVES DE SOUZA VIEIRA	(BR102016013615)_x000D_ DEURILAN ALVES DE SOUZA VIEIRA	BR	ID	BR	(BR102016013615)_x000D_ BR	(BR102016013615)_x000D_ NAME=DEURILAN ALVES DE SOUZA VIEIRA , COUNTRY=BR _x000D_			PENDING	PENDING	ALIVE	ALIVE		2036-06-13		A01M-005/02	1	0	0	0	1		Other special machines		(BR102016013615)_x000D_ the present document belongs to the field of the traps more precisely traps to exterminate larvae of mosquitos. the device in screen aims at preferentially to fight the transmitting mosquito of the affection, zika and chikungunya, that is, the mosquito aedes aegypti. the device functions as a trap attracting the mosquito for its breeder, that is, regions with clean and sto…
73505057	C12Q-001/68/6_x000D_ C12Q-001/70/1	C12Q-001/68_x000D_ C12Q-001/70_x000D_ C12R-001/93	Biotechnology	CN201610147785	2016CN-0147785	2016-03-10	2016	(CN105734171)_x000D_ Zika virus fluorescent PCR detecting kit	LI MING_x000D_ HE WANPING_x000D_ ZHOU QIWEI_x000D_ JIANG XIWEN_x000D_ GAO XIUJIE_x000D_ XIA QIAO_x000D_ YOU HUAN_x000D_ YE AIHUA_x000D_ Wu Jie	(CN105734171)_x000D_ 李明_x000D_ 何皖平_x000D_ 周其伟_x000D_ 蒋析文_x000D_ 高秀洁_x000D_ 夏乔_x000D_ 尤欢_x000D_ 叶爱华_x000D_ 吴洁	(CN105734171)_x000D_ LI MING_x000D_ HE WANPING_x000D_ ZHOU QIWEI_x000D_ JIANG XIWEN_x000D_ GAO XIUJIE_x000D_ XIA QIAO_x000D_ YOU HUAN_x000D_ YE AIHUA_x000D_ WU JIE	AN GENE	AN GENE	AN GENE	(CN105734171)_x000D_ 中山大学达安基因股份有限公司			(CN105734171)_x000D_ DA AN GENE CO., LTD. OF SUN YAT-SEN UNIVERSITY		CN	CORPORATE	CN					PENDING	PENDING	ALIVE	ALIVE		2036-03-10	C12Q-001/70/1	C12Q-001/70	1	4	0	0	1		Biotechnology	(CN105734171)_x000D_ PCR KIT(100,4)_x000D_ FLUORESCENT ZIKA VIRUS(100,3)_x000D_ ZIKA VIRUS(63,15)_x000D_ ZIKA VIRUS RNA(61,2)_x000D_ FLUORESCENT ZIKA VIRUS PCR(55,1)_x000D_ COLLECTIVELY PACKAGED REAGENT BOTTLE(54,1)_x000D_ ZIKA VIRUS CLINICAL TESTING(45,1)_x000D_ ROUTE PREDOMINANT PROPAGATION(42,1)_x000D_ CLINICAL DISEASE ZIKA VIRUS(41,1)_x000D_ RT PCR(38,12)_x000D_ ZIKA VIRUS MONITORING(38,1)_x0…	(CN105734171)_x000D_ The invention provides a Zika virus fluorescent PCR detecting kit, and relates to a kit for detecting Zika virus, in particular to simultaneous detection of Zika virus RNA by using a real-time fluorescent polymerase chain type reaction technology.The kit mainly comprises RT-PCR reaction liquid, primer probe mixed liquid, an RT-PCR reaction enzyme system, DEPC H2O and a packag…	(CN105734171)_x000D_ The kit operation is easy, and short detection time, can realize a high-throughput detection, plus it is inexpensive, is expected to be applied to detect Zika virus clinical testing, inspection and quarantine of the epidemic situation monitoring._x000D_ The advantages of the present invention as compared with the prior art for Zika virus nucleic acid amplification levels have…	(CN105734171)_x000D_ 1. One PCR kit for detecting fluorescent Zika virus, including: 1) RT-PCR reaction solution, a primer probe mixture, RT-PCR reaction enzymes, DEPCH2 O,negative mass-to-controlled goods, quality control materials and the positive 2) separate from and collectively packaged reagent bottle or tube container of these, wherein the primer probe hybrid Zika was made virus-specific po…	(CN105734171)_x000D_ The present invention relates to a kit for detecting fluorescent Zika virus PCR, in particular to a one-step process using real-time polymerase chain reaction techniques Zika virus NS1 gene detection kit._x000D_ The present invention relates to a kit for detecting Zika virus, in particular to a real-time polymerase chain reaction using fluorescence detection Zika virus RNA at…
73589259	A61K-039/12_x000D_ C12N-2770/24034_x000D_ Y02A-050/392	A61K-039/12_x000D_ A61P-031/12	Pharmaceuticals	CN201610222124	2016CN-0222124	2016-04-11	2016	(CN105749268)_x000D_ Inactivated Zika virus vaccine	WANG LIN_x000D_ LÜ ZHE_x000D_ HUI ZENGDI_x000D_ GAO QIANG	(CN105749268)_x000D_ 王琳_x000D_ 吕哲_x000D_ 惠增弟_x000D_ 高强	(CN105749268)_x000D_ WANG LIN_x000D_ LÜ ZHE_x000D_ HUI ZENGDI_x000D_ GAO QIANG	SINOVAC RESEARCH & DEVELOPMENT	SINOVAC RESEARCH & DEVELOPMENT	SINOVAC RESEARCH & DEVELOPMENT	(CN105749268)_x000D_ 北京科兴中维生物技术有限公司			(CN105749268)_x000D_ SINOVAC RESEARCH & DEVELOPMENT CO., LTD.		CN	CORPORATE	CN					PENDING	PENDING	ALIVE	ALIVE		2036-04-11	Y02A-050/392	A61K-039/12	1	1	0	0	1		Pharmaceuticals	(CN105749268)_x000D_ ZIKA VIRUS VACCINE(100,11)_x000D_ PROTEIN(100,7)_x000D_ INACTIVATED ZIKA VIRUS VACCINE(100,4)_x000D_ ZIKA VIRUS ANTIGEN(100,3)_x000D_ ZIKA VIRUS ATTACK(46,2)_x000D_ EXTERMINATION ZIKA VIRUS(45,1)_x000D_ CULTURE HARVESTED VIRUS(41,2)_x000D_ NEONATAL BRASIL MICROCEPHALY(39,1)_x000D_ ZIKA VIRUS WORKING(35,2)_x000D_ ZIKA VIRUS VACCINE SOLUTION(34,1)_x000D_ DENSE MONOLAYER(33,3)_x…	(CN105749268)_x000D_ The invention provides an inactivated Zika virus vaccine.The inactivated Zika virus vaccine is obtained by: performing ultrafiltration and concentration on Zika virus liquid after inactivation, centrifuging the concentrated virus liquid by adopting a sucrose density zone, performing ion exchange and concentration sterilization on a centrifugal product to obtain a Zika virus v…	(CN105749268)_x000D_ The present invention has the following advantages: The present invention (1) in which an effective guard Zika virus vaccine prepared for the first time, it is possible to largely alleviate the current Zika virus epidemic, greatly reduce the patient, to provide good security comes eugenics, women of child-inoculated with the vaccine is capable of protecting the progestational…	(CN105749268)_x000D_ 1. One inactivated Zika virus vaccine, characterized in, Zika virus antigen content of 100-1600 U/mL, and the total protein content of less than 20g/ml._x000D_ 5. Zika virus vaccine inactivated A production method, characterized in, comprises the following steps: Vero cells cultured cell culture techniques is utilized as a (1) carrier, when the cells grow into dense monolayer…	(CN105749268)_x000D_ The present invention provides a vaccine inactivated Zika virus, Zika virus solution was concentrated by ultrafiltration after it is inactivated, a virus using a sucrose density concentrated zonal centrifugation, centrifugal product being exchanged, Zika virus vaccine solution obtained is concentrated to remove bacteria, vaccine stock solution was diluted to a total protein c…
73660154	A61K-039/12_x000D_ C07K-014/005_x000D_ C07K-014/18/25_x000D_ C12N-2770/24122_x000D_ C12N-2770/24134	A61K-039/12_x000D_ A61P-031/14_x000D_ C07K-014/005_x000D_ C07K-014/18	Biotechnology_x000D_ Pharmaceuticals	GB201608896	2016GB-0008896	2016-05-20	2016	(WO2017201543)_x000D_ Variant flavivirus envelope sequences and uses thereof	LAING PETER		(WO2017201543)_x000D_ LAING, Peter	ANDERSON KOREN_x000D_ LAING PETER	ANDERSON KOREN_x000D_ LAING PETER	ANDERSON KOREN				(WO2017201543)_x000D_ ANDERSON, Koren ([US])_x000D_ (GB201608896)_x000D_ LAING, PETER_x000D_ (GB2550418)_x000D_ Peter Laing_x000D_ (GB201719423)_x000D_ Laing Peter	(WO2017201543)_x000D_ ANDERSON, Koren	GB	ID;ID	GB	(WO2017201543)_x000D_ US	(WO2017201543)_x000D_ NAME=ANDERSON, Koren , COUNTRY=US _x000D_	(WO2017201543)_x000D_ GB	(WO2017201543)_x000D_ NAME=LAING, Peter 56 Station Road Willingham Cambridge Cambridgeshire CB24 5HG , POSTCODE=5HG , COUNTRY=GB _x000D_	PENDING	(WO2017201543)_x000D_ PENDING_x000D_ (GB201608896)_x000D_ PENDING_x000D_ (GB201719423)_x000D_ PENDING	ALIVE	(WO2017201543)_x000D_ ALIVE_x000D_ (GB201608896)_x000D_ ALIVE_x000D_ (GB201719423)_x000D_ ALIVE		(WO2017201543)_x000D_ 2019-11-20_x000D_ (GB201608896)_x000D_ 2036-05-20_x000D_ (GB201719423)_x000D_ 2037-05-22	C07K-014/005	C07K-014/005	2	0	3	13	3	(WO2017201543)_x000D_ National States: AE AG AL AM AO AT AU AZ BA BB BG BH BN BR BW BY BZ CA CH CL CN CO CR CU CZ DE DJ DK DM DO DZ EC EE EG ES FI GB GD GE GH GM GT HN HR HU ID IL IN IR IS JP KE KG KH KN KP KR KW KZ LA LC LK LR LS LU LY MA MD ME MG MK MN MW MX MY MZ NA NG NI NO NZ OM PA PE PG PH PL PT QA RO RS RU RW SA SC SD SE SG SK SL SM ST SV SY TH TJ TM TN TR TT TZ UA UG US UZ VC VN ZA ZM ZW_…	Biotechnology_x000D_ Pharmaceuticals	(WO2017201543)_x000D_ FUSION PROTEIN(100,20)_x000D_ NATURAL FLAVIVIRUS(81,6)_x000D_ FLAVIVIRUS ANALOG(79,11)_x000D_ ZIKA VIRUS ANALOG(67,2)_x000D_ HEMORRHAGIC MANIFESTATION(59,1)_x000D_ DEN ANALOG(56,8)_x000D_ DENGUE ANALOG(52,2)_x000D_ FEBRILE ILLNESS(50,1)_x000D_ DENGUE SEROTYPE DEN(49,4)_x000D_ AGONISTIC ANTIBODY(49,1)_x000D_ BACTERIAL POLYSACCHARIDE(47,1)_x000D_ FLAVIVIRUS(46,33)_x000D_ OUTCO…	(WO2017201543)_x000D_ The invention relates to isolated recombinant analogues of flavivirus E-protein fusion loops comprising at least one glycosylation site for an N-linked glycan that is not present in the natural flavivirus E-protein fusion loop sequence, wherein the at least one glycosylation site 5 is an N-linked glycosylation sequon (Asn-X-Ser/Thr) and the Asn (N) residue of the sequon occu…	(WO2017201543)_x000D_ Accordingly, there is a clear need for vaccine approaches that are designed purposefully to avoid the problem of antibody-dependent enhancement._x000D_ Given the lack of efficient treatment against the infection and the risk to human health, there is a need to develop an efficient vaccine that provides a protective response without the potential to cause antibody- dependent …	(WO2017201543)_x000D_ Claims 1. An isolated recombinant analogue of a flavivirus E-protein fusion loop comprising at least one glycosylation site for an N-linked glycan that is not present in a natural flavivirus E- protein fusion loop sequence, wherein the at least one glycosylation site is an N-linked glycosylation sequon (Asn-X-Ser/Thr) and the Asn (N) residue of the sequon occupies any of pos…	(WO2017201543)_x000D_ An analogue of the invention having at least one additional glycan attached thereto is provided._x000D_ The invention provides an isolated recombinant analogue of a flavivirus E-protein comprising an analogue of a flavivirus E-protein fusion loop of the invention._x000D_ The invention provides an isolated recombinant analogue of a flavivirus E-protein fusion loop comprising …	(GB2550418)_x000D_ Search Report references [Examiner]_x000D_ -J. Virol., Vol.87, 2013, Roby, J. A. et al., "West Nile virus genome...", pp.13063-13069_x000D_ -J. Gen. Virol., Vol.95, 2014, Roby, J. A. et al., "Increased expression of capsid...", pp.2176-2191_x000D_ -J. Biol. Chem., Vol.281, Davis, C. W. et al., "The location of asparagine-linked...", pp.37183-37194_x000D_ -Wikipedia, "N-linked g…
73860755	C12Q-001/68/51_x000D_ C12Q-001/70/1	C12M-001/00_x000D_ C12M-001/34_x000D_ C12N-015/11_x000D_ C12Q-001/68_x000D_ C12Q-001/70	Biotechnology	CN201610340665	2016CN-0340665	2016-05-20	2016	(CN105838713)_x000D_ Method for detecting fluorogenic quantitative PCR of Zika virus, primers and kit	LIU YINGXIA_x000D_ GAO FU_x000D_ YANG YANG_x000D_ BI YUHAI_x000D_ Wang Qiang_x000D_ ZHENG HAIXIA	(CN105838713)_x000D_ 刘映霞_x000D_ 高福_x000D_ 杨扬_x000D_ 毕玉海_x000D_ 王强_x000D_ 郑海霞	(CN105838713)_x000D_ Liu Yingxia_x000D_ Gao Fu_x000D_ Yang Yang_x000D_ Bi Yuhai_x000D_ Wang Qiang_x000D_ Zheng Haixia	THIRD PEOPLE S HOSPITAL OF SHENZHEN	THIRD PEOPLE S HOSPITAL OF SHENZHEN	THIRD PEOPLE S HOSPITAL OF SHENZHEN	(CN105838713)_x000D_ 深圳市第三人民医院			(CN105838713)_x000D_ The Third People's Hospital Of Shenzhen		CN	ACADEMY	CN					PENDING	PENDING	ALIVE	ALIVE		2036-05-20	C12Q-001/70/1	C12N-015/11	1	0	1	0	1		Biotechnology	(CN105838713)_x000D_ ZIKA VIRUS(100,28)_x000D_ PRIMER(100,27)_x000D_ FLUORESCENT QUANTITATIVE PCR(100,18)_x000D_ PROBE(100,16)_x000D_ KIT(100,12)_x000D_ VIREMIA ZIKA VIRUS(100,1)_x000D_ FLUORESCENT QUANTITATIVE PCR REAGENT(99,5)_x000D_ FLUORESCENT QUANTITATIVE PCR PRIMER(88,3)_x000D_ ZIKA VIRUS PRIMER(87,1)_x000D_ PCR AMPLIFICATION REAGENT(74,7)_x000D_ TAKARA CORPORATION(65,10)_x000D_ ANTIBODY NE…	(CN105838713)_x000D_ The invention relates to a method for detecting the fluorogenic quantitative PCR (Polymerase Chain Reaction) of a Zika virus, primers and a kit.The invention provides a group of primers and probes; one of the primers contains a nucleotide sequence shown as SEQ ID NO: 1, and the other primer contains a nucleotide sequence shown as SEQ ID NO: 2.The invention further provides ap…	(CN105838713)_x000D_ The present invention has the following advantages: Zika virus primers designed for the present invention (1), good probe specificity, sensitivity is high, and wide application range and short detection time._x000D_ Fluorescence-based quantification with high specificity, high sensitivity, good repeatability, quantitatively accurate, Zika virus infection has the advantages of…	(CN105838713)_x000D_ 1. A set of primers and probes, characterized in, one of which primer comprises SEQ ID NO: 1 of the nucleotide sequence, another primer comprising SEQ ID NO: 2 of the nucleotide sequence.	(CN105838713)_x000D_ The present invention 1st aspect there is provided a set of primers and probes, wherein one primer comprises SEQ ID NO: 1 of the nucleotide sequence, the other which comprises SEQ ID NO: 2 of the nucleotide sequence._x000D_ The present invention 2nd aspect provides the primers and probes for the manufacture of a product Zika virus detection application._x000D_ The present inv…
73917240	C12Q-001/68/48_x000D_ C12Q-001/70/1	C12N-015/11_x000D_ C12Q-001/68_x000D_ C12Q-001/70_x000D_ C12R-001/93	Biotechnology	CN201610353475	2016CN-0353475	2016-05-25	2016	(CN105861753)_x000D_ Nested RT-PCR method, primers and reagent kit for detecting Zika virus	GAO FU_x000D_ LIU YINGXIA_x000D_ Wang Qiang_x000D_ BI YUHAI_x000D_ YANG YANG_x000D_ ZHENG HAIXIA	(CN105861753)_x000D_ 高福_x000D_ 刘映霞_x000D_ 王强_x000D_ 毕玉海_x000D_ 杨扬_x000D_ 郑海霞	(CN105861753)_x000D_ Gao Fu_x000D_ Liu Yingxia_x000D_ Wang Qiang_x000D_ Bi Yuhai_x000D_ Yang Yang_x000D_ Zheng Haixia	THIRD PEOPLE S HOSPITAL OF SHENZHEN	THIRD PEOPLE S HOSPITAL OF SHENZHEN	THIRD PEOPLE S HOSPITAL OF SHENZHEN	(CN105861753)_x000D_ 深圳市第三人民医院			(CN105861753)_x000D_ The Third People's Hospital Of Shenzhen		CN	ACADEMY	CN					PENDING	PENDING	ALIVE	ALIVE		2036-05-25	C12Q-001/70/1	C12Q-001/70	1	0	0	0	1		Biotechnology	(CN105861753)_x000D_ RT PCR(100,40)_x000D_ PRIMER(100,23)_x000D_ ZIKA VIRUS(100,19)_x000D_ KIT(100,17)_x000D_ TAKARA RNA PCR KIT(100,13)_x000D_ PRIMER PAIR(100,12)_x000D_ INFANT ZIKA VIRUS(99,1)_x000D_ TAKARA COMPANY ITEM(85,3)_x000D_ ZIKA VIRUS CLINICAL DIAGNOSIS(67,1)_x000D_ REAGENT TAKARA RNA KIT(66,2)_x000D_ ZIKA VIRUS DETECTION KIT(55,1)_x000D_ BIOLOGICAL SAMPLE(53,22)_x000D_ CDNA FRAGMENT(5…	(CN105861753)_x000D_ The invention provides two primer pairs.One primer pair includes nucleotide sequences shown as SEQ ID NO:1 and SEQ ID NO:2, and the other primer pair includes nucleotide sequences shown as SEQ ID NO:3 and SEQ ID NO:4.The invention further provides application of the two primer pairs in preparing products for detecting the Zika virus.The invention further provides a reagent ki…	(CN105861753)_x000D_ However, it is possible to better explain the relationship between the infant Zika virus with microcephaly before there is a need to make further investigation, the ongoing search for other possible etiology in the further investigation carried out._x000D_ The present invention has the following advantages:	(CN105861753)_x000D_ 1. Two sets of primer pairs, characterized in, which a set of primer pair comprises SEQ ID NO: 1 and the SEQ ID NO: 2 of the nucleotide sequence, another set of primer pair comprises SEQ ID NO: 3 and the SEQ ID NO: 4 of the nucleotide sequence.	(CN105861753)_x000D_ The present invention 1st aspect there is provided two sets of primer pairs, wherein a set of primer pair comprises SEQ ID NO: 1 or SEQ ID NO: 2 of the nucleotide sequence, another set of the primer pair comprises SEQ ID NO: 3 or SEQ ID NO: 4 of the nucleotide sequence._x000D_ The present invention 2nd aspect there is provided two sets of primer pairs for the manufacture of t…
74168529	C12Q-001/68/6_x000D_ C12Q-001/70/1	C12N-015/11_x000D_ C12Q-001/68_x000D_ C12Q-001/70	Biotechnology	CN201610481524	2016CN-0481524	2016-06-27	2016	(CN105936946)_x000D_ One step method inverse transcription PCR kit for detecting and differentiating Zika viruses and detection method thereof	WANG CHENGMING_x000D_ ZHANG JILEI_x000D_ WANG YAOYAO_x000D_ There are Jinfeng_x000D_ CHOU HAIXIANG_x000D_ HUANG KE	(CN105936946)_x000D_ 王成明_x000D_ 张继垒_x000D_ 王瑶瑶_x000D_ 有金凤_x000D_ 仇海香_x000D_ 黄可	(CN105936946)_x000D_ WANG CHENGMING_x000D_ ZHANG JILEI_x000D_ WANG YAOYAO_x000D_ YOU JINFENG_x000D_ CHOU HAIXIANG_x000D_ HUANG KE	YANGZHOU UNIVERSITY	YANGZHOU UNIVERSITY	YANGZHOU UNIVERSITY	(CN105936946)_x000D_ 扬州大学			(CN105936946)_x000D_ YANGZHOU UNIVERSITY		CN	ACADEMY	CN					PENDING	PENDING	ALIVE	ALIVE		2036-06-27	C12Q-001/70/1	C12Q-001/70	1	2	1	0	1		Biotechnology	(CN105936946)_x000D_ POLYMERASE CHAIN REACTION(100,110)_x000D_ ZIKA VIRUS(100,58)_x000D_ REVERSE TRANSCRIPTION(100,32)_x000D_ FLUORESCENCE RESONANCE ENERGY TRANSFER(100,30)_x000D_ PROBE(100,27)_x000D_ PRIMER(100,17)_x000D_ AMPLIFICATION DETECTION(100,12)_x000D_ REVERSE TRANSCRIPTION STEP(100,12)_x000D_ REALTIME FLUORESCENT(100,2)_x000D_ STEP PRIMER(100,2)_x000D_ ZIKA VIRUS DETECTION KIT(100,2)_x0…	(CN105936946)_x000D_ The invention provides a primer, probe, and kit for detecting and differentiating Zika viruses through one step method inverse transcription PCR, a detection method and applications thereof.The PCR kit can be sensitively, specifically, efficiently, and rapidly detect and differentiate two genotypes of Zika viruses namely Asia type and Africa type at the same time.The principl…	(CN105936946)_x000D_ Wherein, in a real-time reverse transcription polymerase chain reaction techniques are (Reverse-Transcription Polymerase Chain Reaction,RT-PCR), RT-PCR-based molecular biology method, as Zika virus infection diagnosis, prevention and control provides a fast, accurate, efficient diagnosis method._x000D_ Thus, the suspicious cases to light at febrile phase, a most preferred lab…	(CN105936946)_x000D_ 1. Reverse transcription PCR a one-step primers and probes detect and Typing Zika virus, characterized in, primers comprising an upstream primer and downstream primer, probe comprises 6-FAM probe and probe LCRed 640, wherein: Upstream primer having a nucleotide sequence of SEQ ID No. 1; Downstream primer having a nucleotide sequence of SEQ ID No. 2; 6-FAM probe has the nucleo…	(CN105936946)_x000D_ Published Chinese patent application (Application No.: 201610099248.7) there is provided an apparatus for the fluorescence Zika virus asian type RT-PCR forward, reverse primers and fluorescent oligonucleotide probes, kits and method, for fast, efficient, qualitatively detecting in a sample of asian type Zika virus._x000D_ The present invention relates to the technical field o…
74237969	A61K-039/12_x000D_ C07K-014/18/25_x000D_ C07K-016/10/81_x000D_ C07K-2317/21_x000D_ C07K-2317/33_x000D_ C07K-2317/34_x000D_ C12N-2770/24122_x000D_ C12N-2770/24134_x000D_ Y02A-050/386_x000D_ Y02A-050/39_x000D_ Y02A-050/392_x000D_ Y02A-050/394	A61K-039/12_x000D_ C07K-014/18_x000D_ C07K-016/10	Pharmaceuticals	GB201610162	2016GB-0010162	2016-06-10	2016	(WO2017212291)_x000D_ Neutralising antibody against dengue for use in a method of prevention and/or treatment of zika infection	REY FÉLIX_x000D_ BARBA SPAETH GIOVANNA_x000D_ VANEY MARIE-CHRISTINE_x000D_ ROUVINSKI ALEXANDER_x000D_ SCREATON GAVIN_x000D_ MONGKOLSAPAYA JUTHATHIP		(WO2017212291)_x000D_ REY, Félix_x000D_ BARBA SPAETH, Giovanna_x000D_ VANEY, Marie-Christine_x000D_ ROUVINSKI, Alexander_x000D_ SCREATON, Gavin_x000D_ MONGKOLSAPAYA, Juthathip	IMP INNOVATIONS & INSTITUTE PASTEUR_x000D_ IMPERIAL INNOVATIONS_x000D_ INSTITUT PASTEUR	IMP INNOVATIONS & INSTITUTE PASTEUR_x000D_ IMPERIAL INNOVATIONS_x000D_ INSTITUT PASTEUR	IMPERIAL INNOVATIONS_x000D_ INSTITUT PASTEUR				(WO2017212291)_x000D_ IMPERIAL INNOVATIONS LTD ([GB])_x000D_ INSTITUT PASTEUR ([FR])_x000D_ (GB201610162)_x000D_ Imperial Innovations Limited AND Institut Pasteur	(WO2017212291)_x000D_ IMPERIAL INNOVATIONS LTD; INSTITUT PASTEUR	GB	ACADEMY;ACADEMY	GB	(WO2017212291)_x000D_ GB; FR	(WO2017212291)_x000D_ NAME=IMPERIAL INNOVATIONS LTD 52 Princes Gate South Kensington London SW7 2PG , POSTCODE=SW7 2PG , COUNTRY=GB _x000D_ _x000D_ NAME=INSTITUT PASTEUR 28 rue du Docteur Roux 75015 Paris , POSTCODE=75015 , COUNTRY=FR _x000D_	(WO2017212291)_x000D_ IL; GB; FR	(WO2017212291)_x000D_ NAME=REY, Félix Institut Pasteur 28 rue du Docteur Roux 75015 Paris , POSTCODE=75015 , COUNTRY=FR _x000D_ _x000D_ NAME=BARBA SPAETH, Giovanna Institut Pasteur 28 rue du Docteur Roux 75015 Paris , POSTCODE=75015 , COUNTRY=FR _x000D_ _x000D_ NAME=VANEY, Marie-Christine Institut Pasteur 28 rue du Docteur Roux 75015 Paris , POSTCODE=75015 , COUNTRY=FR _x000D_ _x000D_ NAME=ROUVIN…	PENDING	(WO2017212291)_x000D_ PENDING_x000D_ (GB201610162)_x000D_ LAPSED	ALIVE	(WO2017212291)_x000D_ ALIVE_x000D_ (GB201610162)_x000D_ DEAD		(WO2017212291)_x000D_ 2019-12-10_x000D_ (GB201610162)_x000D_ 2018-07-04	A61K-039/12	A61K-039/12	2	0	2	12	2	(WO2017212291)_x000D_ National States: AE AG AL AM AO AT AU AZ BA BB BG BH BN BR BW BY BZ CA CH CL CN CO CR CU CZ DE DJ DK DM DO DZ EC EE EG ES FI GB GD GE GH GM GT HN HR HU ID IL IN IR IS JO JP KE KG KH KN KP KR KW KZ LA LC LK LR LS LU LY MA MD ME MG MK MN MW MX MY MZ NA NG NI NO NZ OM PA PE PG PH PL PT QA RO RS RU RW SA SC SD SE SG SK SL SM ST SV SY TH TJ TM TN TR TT TZ UA UG US UZ VC VN ZA ZM …	Pharmaceuticals	(WO2017212291)_x000D_ ZIKA VIRUS(100,84)_x000D_ FLAVIVIRUS(67,68)_x000D_ DENGUE VIRUS SEROTYPE(63,36)_x000D_ MUTANT SE HETERODIMER(55,8)_x000D_ MUTANT SE HOMODIMER(53,14)_x000D_ MUTANT ENVELOPE POLYPEPTIDE(47,3)_x000D_ CHILD BEARING AGE WOMAN(45,6)_x000D_ STABILIZED RECOMBINANT FLAVIVIRUS(41,1)_x000D_ SE MONOMER(40,25)_x000D_ CANDIDATE ANTIGEN(37,6)_x000D_ NATIVE HETERODIMER(36,3)_x000D_ DENV(35,…	(WO2017212291)_x000D_ A flavivirus Envelope Dimer Epitope (EDE) for use in vaccinating an individual against one or more flaviviruses wherein the EDE is a stabilized recombinant flavivirus, optionally dengue virus and/or zika envelope glycoprotein E ectodomain (sE) dimer, wherein the dimer is: covalently stabilized with at least one disulphide inter-chain bond between the two sE monomers, and/or …	(WO2017212291)_x000D_ It will be appreciated that the EDE comprises a quaternary structure dependent epitope at the dimer interface of the envelope proteins of one or more serotypes of flavivirus, for example one or more serotypes of zika and/or Dengue virus._x000D_ Thus it will be appreciated that the compound may bind to the EDE of one serotype of flavivirus, for example zika virus or dengue vi…	(WO2017212291)_x000D_ 1. A flavivirus Envelope Dimer Epitope (EDE) for use in vaccinating an individual against one or more flaviviruses wherein the EDE is a stabilized recombinant flavivirus, optionally dengue virus and/or zika, envelope glycoprotein E ectodomain (sE) dimer, wherein the dimer is: covalently stabilized with at least one disulphide inter-chain bond between the two sE monomers, and…	(WO2017212291)_x000D_ Thus, a first aspect of the invention provides a compound that neutralises more than one serotype of flavivirus, for example more than one serotype of dengue virus and/or zika virus, for use in a method for prevention and/or treatment of infection by one or more flaviviruses, wherein the one or more flaviviruses is selected from zika virus; zika virus and dengue virus; zika …	(WO2017212291)_x000D_ International Search Report [Examiner]_x000D_ -ALEXANDER ROUVINSKI ET AL: "Recognition determinants of broadly neutralizing human antibodies against dengue viruses", NATURE, vol. 520, no. 7545, 12 January 2015 (2015-01-12), pages 109 - 113, XP055233720, ISSN: 0028-0836, DOI: 10.1038/nature14130CC=XP; XP055233720 (Cat. X,I)_x000D_ -WANWISA DEJNIRATTISAI ET AL: "A new class of…
74247488	A01G-009/02_x000D_ A01G-013/0281_x000D_ A01G-031/02_x000D_ A01G-031/06_x000D_ A01G-2013/006_x000D_ Y02P-060/216	A01G-009/02_x000D_ A01G-013/00_x000D_ A01G-013/02_x000D_ A01G-031/02_x000D_ A01G-031/06	Other special machines	KR20160002304U	2016KR-U002304	2016-04-28	2016	(KR200481380U)_x000D_ A pot plant planting device	Kim InHa_x000D_ Kim Dong Wook	(KR200481380U)_x000D_ 김인하_x000D_ 김동욱	(KR200481380U)_x000D_ Kim InHa_x000D_ Kim Dong Wook	KIM HA	KIM DONG WOOK_x000D_ KIM HA	KIM HA_x000D_ KIM DONG WOOK	(KR200481380U)_x000D_ 김인하_x000D_ Reg. Nb: 420080294437_x000D_ 김동욱_x000D_ Reg. Nb: 420100344001			(KR200481380U)_x000D_ Kim In Ha ([KR])_x000D_ Kim Dong Wook ([KR])	(KR200481380U)_x000D_ Kim In Ha; Kim Dong Wook	KR	ID;ID	KR	(KR200481380U)_x000D_ KR	(KR200481380U)_x000D_ NAME=Kim In Ha , COUNTRY=KR , REG=420080294437 _x000D_ _x000D_ NAME=Kim Dong Wook , COUNTRY=KR , REG=420100344001 _x000D_	(KR200481380U)_x000D_ KR	(KR200481380U)_x000D_ NAME=Kim InHa , COUNTRY=KR _x000D_ _x000D_ NAME=Kim Dong Wook , COUNTRY=KR _x000D_	GRANTED	GRANTED	ALIVE	ALIVE	(KR200481380U)_x000D_ 2016-09-23	2026-04-28	Y02P-060/216	A01G-009/02	1	0	1	0	1		Other special machines		(KR200481380U)_x000D_ This idea the car virus the low of the mortar the insect mosquito cannot prescribed form do, with the box together to the inside of the storage of water courage department which had the series orifice the vinyl house, easily, will be able to establish, to do, in order to be established, about the plant planting equipment with the thing, following this idea plant planting equ…
74303860	C07K-016/10_x000D_ C07K-016/10/81_x000D_ C12N-2770/24134	C07K-016/10	Biotechnology	GB201613191	2016GB-0013191	2016-07-29	2016	(WO201820271)_x000D_ Zika virus vaccine and combination vaccine	REYES-SANDOVAL ARTURO_x000D_ LOPEZ-CAMACHO CESAR		(WO201820271)_x000D_ REYES-SANDOVAL, Arturo_x000D_ LOPEZ-CAMACHO, Cesar	OXFORD UNIVERSITY INNOVATION	OXFORD UNIVERSITY INNOVATION	OXFORD UNIVERSITY INNOVATION				(WO201820271)_x000D_ OXFORD UNIVERSITY INNOVATION LTD. ([GB])_x000D_ (GB201613191)_x000D_ UNIV OXFORD INNOVATION LTD	(WO201820271)_x000D_ OXFORD UNIVERSITY INNOVATION LTD.	GB	ACADEMY	GB	(WO201820271)_x000D_ GB	(WO201820271)_x000D_ NAME=OXFORD UNIVERSITY INNOVATION LTD. Buxton Court 3 West Way Oxford Oxfordshire OX2 0JB , POSTCODE=OX2 0JB , COUNTRY=GB _x000D_	(WO201820271)_x000D_ GB	(WO201820271)_x000D_ NAME=REYES-SANDOVAL, Arturo c/o Oxford University Innovations Ltd. Buxton Court 3 West Way Oxford Oxfordshire OX2 0JB , COUNTRY=GB _x000D_ _x000D_ NAME=LOPEZ-CAMACHO, Cesar c/o Oxford University Innovations Ltd. Buxton Court 3 West Way Oxford Oxfordshire OX2 0JB , COUNTRY=GB _x000D_	PENDING	(WO201820271)_x000D_ PENDING_x000D_ (GB201613191)_x000D_ LAPSED	ALIVE	(WO201820271)_x000D_ ALIVE_x000D_ (GB201613191)_x000D_ DEAD		(WO201820271)_x000D_ 2020-01-29_x000D_ (GB201613191)_x000D_ 2018-05-16	C07K-016/10/81	C07K-016/10	2	0	2	12	2	(WO201820271)_x000D_ National States: AE AG AL AM AO AT AU AZ BA BB BG BH BN BR BW BY BZ CA CH CL CN CO CR CU CZ DE DJ DK DM DO DZ EC EE EG ES FI GB GD GE GH GM GT HN HR HU ID IL IN IR IS JO JP KE KG KH KN KP KR KW KZ LA LC LK LR LS LU LY MA MD ME MG MK MN MW MX MY MZ NA NG NI NO NZ OM PA PE PG PH PL PT QA RO RS RU RW SA SC SD SE SG SK SL SM ST SV SY TH TJ TM TN TR TT TZ UA UG US UZ VC VN ZA ZM Z…	Biotechnology	(WO201820271)_x000D_ VIRAL VECTOR VACCINE(100,78)_x000D_ CHIKUNGUNYA VIRAL VECTOR VACCINE(57,14)_x000D_ ZIKA VIRUS(51,62)_x000D_ ZIKA VIRUS ENVELOPE DILI(42,17)_x000D_ ANTIGEN STRUCTURE(31,25)_x000D_ SEQUENCE ENCODING ZIKA VIRUS(30,9)_x000D_ CHIKUNGUNYA VACCINE(26,19)_x000D_ ENCODING NUCLEIC ACID(23,79)_x000D_ ZIKA VIRUS PRM(23,18)_x000D_ NEUTRALIZING ANTIBODY TARGET(21,1)_x000D_ ENVELOPE DILI(19…	(WO201820271)_x000D_ The invention relates to a Zika viral vector vaccine comprising nucleic acid encoding a Zika virus structural antigen, wherein the nucleic acid encoding a Zika virus structural antigen comprises a sequence encoding Zika virus envelope DIII, or part thereof.The invention further relates to a Zika viral vector vaccine in combination with a Chikungunya viral vector vaccine.	(WO201820271)_x000D_ It is highly similar to the strains causing the epidemics in the Americas (at least 99%) but also shows great similarity to the Asian and African genotypes._x000D_ The peptide signal, such as the endogenous Zika peptide signal, may improve secretion of the antigen and provide better antibody response._x000D_ Vaccine development is a lengthy process that requires careful selec…	(WO201820271)_x000D_ 1. A Zika viral vector vaccine comprising nucleic acid encoding a Zika virus structural antigen, wherein the nucleic acid encoding a Zika virus structural antigen comprises a sequence encoding Zika virus envelope Dili, or part thereof._x000D_ 14. A Zika viral vector vaccine comprising nucleic acid encoding a Zika virus structural antigen, wherein the nucleic acid encoding a Z…	(WO201820271)_x000D_ An aim of the present invention is to provide a Zika vaccine that can provide an appropriate immune response against infection from many or all strains of Zika virus._x000D_ According to a first aspect of the present invention, there is provided a Zika viral vector vaccine comprising nucleic acid encoding a Zika virus structural antigen, wherein the nucleic acid encoding a Zi…	(WO201820271)_x000D_ International Search Report [Examiner]_x000D_ -RAFAEL A. LAROCCA ET AL: "Vaccine protection against Zika virus from Brazil", NATURE, vol. 536, no. 7617, 28 June 2016 (2016-06-28), pages 474 - 478, XP055406185, ISSN: 0028-0836, DOI: 10.1038/nature18952CC=XP; XP055406185 (Cat. I)_x000D_ -J. COHEN: "The race for a Zika vaccine is on", SCIENCE, vol. 351, no. 6273, 5 February 2016…
74417734	A01M-001/02_x000D_ A01M-001/02/3_x000D_ A01M-001/02/6_x000D_ A01M-001/08	A01M-001/02_x000D_ A01M-001/06	Other special machines	US62/146,904P	2015US-62146904	2015-04-13	2015	(WO2016168347)_x000D_ Wireless smart mosquito and insect trap device, network and method of counting a population of the mosquitoes or insects	HUR BYUL_x000D_ EISENSTADT WILLIAM R		(WO2016168347)_x000D_ HUR, Byul_x000D_ EISENSTADT, William, R.	UNIVERSITY OF FLORIDA	UNIVERSITY OF FLORIDA	UNIVERSITY OF FLORIDA				(WO2016168347)_x000D_ UNIVERSITY OF FLORIDA RESEARCH FOUNDATION, INC. ([US])	(WO2016168347)_x000D_ UNIVERSITY OF FLORIDA RESEARCH FOUNDATION, INC.	US	ACADEMY	US	(WO2016168347)_x000D_ US	(WO2016168347)_x000D_ NAME=UNIVERSITY OF FLORIDA RESEARCH FOUNDATION, INC. 223 Grinter Hall Gainesville, FL 32611 , POSTCODE=32611 , COUNTRY=US _x000D_	(WO2016168347)_x000D_ US	(WO2016168347)_x000D_ NAME=HUR, Byul 281 Corry Village, Apt. #16 Gainesville, FL 32603 , POSTCODE=32603 , COUNTRY=US _x000D_ _x000D_ NAME=EISENSTADT, William, R. 4315 NW 75th Street Gainesville, FL 32606 , POSTCODE=32606 , COUNTRY=US _x000D_	PENDING	PENDING	ALIVE	ALIVE		2018-10-13	A01M-001/02	A01M-001/02	1	1	3	0	1	(WO2016168347)_x000D_ National States: AE AG AL AM AO AT AU AZ BA BB BG BH BN BR BW BY BZ CA CH CL CN CO CR CU CZ DE DK DM DO DZ EC EE EG ES FI GB GD GE GH GM GT HN HR HU ID IL IN IR IS JP KE KG KN KP KR KZ LA LC LK LR LS LU LY MA MD ME MG MK MN MW MX MY MZ NA NG NI NO NZ OM PA PE PG PH PL PT QA RO RS RU RW SA SC SD SE SG SK SL SM ST SV SY TH TJ TM TN TR TT TZ UA UG US UZ VC VN ZA ZM ZW_x000D_ AR…	Other special machines	(WO2016168347)_x000D_ MOSQUITO(100,68)_x000D_ NETWORK(100,9)_x000D_ ISOLATED BASKET(78,7)_x000D_ INSECT(76,99)_x000D_ FORCE DIRECTION(67,13)_x000D_ BASKET(64,27)_x000D_ NARROW PATH(63,20)_x000D_ POPULATION COUNT(61,8)_x000D_ INSECT PRESENCE(61,7)_x000D_ TRANSPORTATION VEHICLE(47,1)_x000D_ PRESENCE DETECTION(44,7)_x000D_ HUMAN SUFFERING(44,1)_x000D_ CRITICAL DISEASE(40,1)_x000D_ BASKET NEED EMPTYI…	(WO2016168347)_x000D_ Embodiments relate to smart mosquito and insect trap devices, networks and method for detecting, counting, trapping and discarding a population of mosquitoes and/or insects.The mosquito species include the ones such as Aedes mosquito species that can cause Zika virus diseases.The device comprising a housing (201) having a directional force through a narrow path (240) to move…	(WO2016168347)_x000D_ This whole process is not efficient and can be unsafe._x000D_ [031] Placing multiple sensors around the WSMAIT device 100 may make detection more accurate._x000D_ [047] The trap may be necessary to incorporate with one or more detection methods depending on types of insects._x000D_ Mosquitoes can cause human suffering by carrying critical diseases such as West Nile virus, ma…	(WO2016168347)_x000D_ CLAIMS We claim: 1. A device comprising: a housing (201) having a directional force through a narrow path (240) to move an insect or mosquito in a predetermined direction; one or more detectors (255) to detect a presence of an insect or mosquito along the narrow path (240); an isolated basket (260) to trap the insect or mosquito at a location below or at an end of the narrow…
74499157	A61K-031/381_x000D_ A61K-031/4025_x000D_ A61K-031/403_x000D_ A61K-031/4178_x000D_ A61K-031/4535_x000D_ A61K-031/7072_x000D_ A61K-031/713	A61K-031/381_x000D_ A61K-031/4025_x000D_ A61K-031/403_x000D_ A61K-031/4178_x000D_ A61K-031/4535_x000D_ A61K-031/7072_x000D_ A61K-031/713_x000D_ A61P-031/12_x000D_ A61P-031/16_x000D_ A61P-031/18	Pharmaceuticals	GB201615035	2016GB-0015035	2016-09-05	2016	(WO201842207)_x000D_ Treatment and prevention of viral infection	ZHUANG XIAODONG_x000D_ MCKEATING JANE ALISON		(WO201842207)_x000D_ ZHUANG, Xiaodong_x000D_ MCKEATING, Jane Alison	UNIVERSITY OF BIRMINGHAM	UNIVERSITY OF BIRMINGHAM	UNIVERSITY OF BIRMINGHAM				(WO201842207)_x000D_ THE UNIVERSITY OF BIRMINGHAM ([GB])_x000D_ (GB201615035)_x000D_ University of Birmingham, The	(WO201842207)_x000D_ THE UNIVERSITY OF BIRMINGHAM	GB	ACADEMY	GB	(WO201842207)_x000D_ GB	(WO201842207)_x000D_ NAME=THE UNIVERSITY OF BIRMINGHAM Edgbaston Birmingham B15 2TT , POSTCODE=B15 2TT , COUNTRY=GB _x000D_	(WO201842207)_x000D_ GB	(WO201842207)_x000D_ NAME=ZHUANG, Xiaodong Target Discovery Institute, NDM Research Building Old Road Campus, Roosevelt Drive Headington Oxford Oxfordshire OX3 7FZ , POSTCODE=OX3 7FZ , COUNTRY=GB _x000D_ _x000D_ NAME=MCKEATING, Jane Alison Target Discovery Institute, NDM Research Building Old Road Campus, Roosevelt Drive Headington Oxford Oxfordshire OX3 7FZ , POSTCODE=OX3 7FZ , COUNTRY=GB _x000D_	PENDING	(WO201842207)_x000D_ PENDING_x000D_ (GB201615035)_x000D_ LAPSED	ALIVE	(WO201842207)_x000D_ ALIVE_x000D_ (GB201615035)_x000D_ DEAD		(WO201842207)_x000D_ 2020-03-05_x000D_ (GB201615035)_x000D_ 2018-06-06	A61K-031/7072	A61K-031/4178	2	0	0	12	2	(WO201842207)_x000D_ National States: AE AG AL AM AO AT AU AZ BA BB BG BH BN BR BW BY BZ CA CH CL CN CO CR CU CZ DE DJ DK DM DO DZ EC EE EG ES FI GB GD GE GH GM GT HN HR HU ID IL IN IR IS JO JP KE KG KH KN KP KR KW KZ LA LC LK LR LS LU LY MA MD ME MG MK MN MW MX MY MZ NA NG NI NO NZ OM PA PE PG PH PL PT QA RO RS RU RW SA SC SD SE SG SK SL SM ST SV SY TH TJ TM TN TR TT TZ UA UG US UZ VC VN ZA ZM Z…	Pharmaceuticals	(WO201842207)_x000D_ VIRAL INFECTION(100,23)_x000D_ CIRCADIAN CLOCK GENE(100,20)_x000D_ CIRCADIAN CLOCK(100,16)_x000D_ GENE PRODUCT(100,16)_x000D_ ANTIVIRAL(100,2)_x000D_ ARCADIAN BEHAVIOR REGULATION(67,1)_x000D_ CIRCADIAN TRANSCRIPTIONAL FEEDBACK LOOP(66,4)_x000D_ PATHOGEN INFECTION(40,1)_x000D_ OCCLUDIN EXPRESSION(39,1)_x000D_ RNA TRANSCRIPTION(38,1)_x000D_ EPITHELIAL POLARITY(37,1)_x000D_ INFE…	(WO201842207)_x000D_ An agent for use in a method of treating and/or preventing a viral infection, and compositions comprising said agent, are described.The agent modulates the expression of one or more circadian clock genes, or the activity of one or more circadian clock gene products.The agent may comprise or consist of an agonist of REV-ERBα.	(WO201842207)_x000D_ It will be appreciated that whether activity is increased or decreased will depend on the nature of the agent (e.g. agonist vs. antagonist), and whether the target is an activator or a repressor in the circadian transcriptional feedback loop._x000D_ It will be appreciated that whether expression is increased or decreased will depend on the nature of the agent (e.g. agonist vs…	(WO201842207)_x000D_ 1. An agent that modulates the expression of one or more circadian clock genes, or activity of one or more circadian clock gene products, for use in a method of treating or preventing a viral infection._x000D_ 13. An anti-viral composition comprising a therapeutically effective amount of an agent, such as a siRNA molecule as described herein, that modulates the expression of …	(WO201842207)_x000D_ According to a second aspect of the invention there is provided a method of treating or preventing a viral infection, the method comprising administration of a therapeutically effective amount of an agent according to the first aspect of the invention to a subject in need thereof._x000D_ According to a first aspect of the invention there is provided an agent that modulates th…	(WO201842207)_x000D_ International Search Report [Examiner]_x000D_ -CAROLINA SCAGNOLARI ET AL: "Antiviral activity of the interferon [alpha] family: biological and pharmacological aspects of the treatment of chronic hepatitis C", EXPERT OPINION ON BIOLOGICAL THERAPY, vol. 13, no. 5, 1 May 2013 (2013-05-01), ASHLEY, LONDON; GB, pages 693 - 711, XP055421360, ISSN: 1471-2598, DOI: 10.1517/14712598.2…
74520649	A01M-001/02/3_x000D_ A01M-001/06_x000D_ A01M-001/10/6_x000D_ A01M-001/22/3	A01M-001/02_x000D_ A01M-001/06_x000D_ A01M-001/10_x000D_ A01M-001/22	Other special machines	BR102016010325	2016BR-0010325	2016-05-06	2016	(BR102016010325)_x000D_ EQUIPMENT FOR CONTROL AND ELIMINATION OF INSECTS HEMATOFAGOS BY MEANS OF ELECTROCUTION	DANIEL GONÇALVES PEREIRA DO NASCIMENTO		(BR102016010325)_x000D_ DANIEL GONÇALVES PEREIRA DO NASCIMENTO	DANIEL GONCALVES PEREIRA DO NASCIMENTO						(BR102016010325)_x000D_ DANIEL GONÇALVES PEREIRA DO NASCIMENTO ([BR])_x000D_ (BR102016010325)_x000D_ DANIEL GONÇALVES PEREIRA DO NASCIMENTO	(BR102016010325)_x000D_ DANIEL GONÇALVES PEREIRA DO NASCIMENTO	BR	ID	BR	(BR102016010325)_x000D_ BR	(BR102016010325)_x000D_ NAME=DANIEL GONÇALVES PEREIRA DO NASCIMENTO , COUNTRY=BR _x000D_			PENDING	PENDING	ALIVE	ALIVE		2036-05-06	A01M-001/02/3	A01M-001/22	1	0	0	0	1		Other special machines		(BR102016010325)_x000D_ equipment for control and elimination of - hematófagos insects by means of electrocution. this is a product related to the sector of control of insects vectors. one mentions to the present object to an equipment directed to the control of insects vectors and application in all the necessary places, with various means of attraction of these vectors, what it incredibly retur…
74542211	C12N-007/00_x000D_ C12N-2770/24123_x000D_ C12N-2770/24151_x000D_ C12Q-001/70/1_x000D_ C12Q-2600/166	C12N-007/04_x000D_ C12N-015/70_x000D_ C12Q-001/68_x000D_ C12Q-001/70_x000D_ C12R-001/93	Biotechnology	CN201610398517	2016CN-0398517	2016-06-07	2016	(CN106085974)_x000D_ Zika virus pseudovirion and preparation method thereof	ZHANG YAN_x000D_ GAI WEI_x000D_ XING WANLI_x000D_ ZHANG CHUNTAO_x000D_ LIU DONGLAI_x000D_ CHENG JING	(CN106085974)_x000D_ 张岩_x000D_ 盖伟_x000D_ 邢婉丽_x000D_ 张春涛_x000D_ 刘东来_x000D_ 程京	(CN106085974)_x000D_ ZHANG YAN_x000D_ GAI WEI_x000D_ XING WANLI_x000D_ ZHANG CHUNTAO_x000D_ LIU DONGLAI_x000D_ CHENG JING	CAPITALBIO_x000D_ NATIONAL INSTITUTE FOR FOOD & DRUG CONTROL	CAPITALBIO_x000D_ NATIONAL INSTITUTE FOR FOOD & DRUG CONTROL	CAPITALBIO_x000D_ NATIONAL INSTITUTE FOR FOOD & DRUG CONTROL	(CN106085974)_x000D_ 博奥生物集团有限公司_x000D_ 中国食品药品检定研究所			(CN106085974)_x000D_ CAPITALBIO CORPORATION_x000D_ NATIONAL INSTITUTE FOR FOOD AND DRUG CONTROL		CN	CORPORATE;ACADEMY	CN					PENDING	PENDING	ALIVE	ALIVE		2036-06-07	C12N-007/00	C12N-007/04	1	2	0	0	1		Biotechnology	(CN106085974)_x000D_ ZIKA VIRUS(100,44)_x000D_ GENE(100,24)_x000D_ ZIKA VIRUS PSEUDOVIRION PARTICLE(100,16)_x000D_ PROTEIN(100,12)_x000D_ PSEUDOVIRION PARTICLE(100,5)_x000D_ MS2 PHAGE(100,4)_x000D_ ENZYME(100,3)_x000D_ PSEUDOVIRION ZIKA VIRUS(100,3)_x000D_ PHAGE MS2 CAPSID PROTEIN(100,2)_x000D_ ZIKA VIRUS PSEUDOVIRION GRAIN(100,2)_x000D_ GENE PROTEIN ENCAPSULATION(100,1)_x000D_ HOUSING FORMED PSE…	(CN106085974)_x000D_ The invention discloses Zika virus pseudovirion and a preparation method thereof.The provided Zika virus pseudovirion is pseudovirion formed by wrapping Zika virus NS5 gene with coat protein; the coat protein is composed of phage MS2 maturase and phage MS2 capsid protein; the nucleotide sequence of the Zika virus NS5 gene is in the 19-2727st site in a sequence 2.Experiments p…		(CN106085974)_x000D_ 1. One Zika virus Pseudovirion particles, Zika virus NS5 gene protein encapsulation into a housing formed Pseudovirion particles; By the phage MS2 coat protein and phage MS2 capsid proteins mature enzyme; Zika virus NS5 gene nucleotide sequence is the sequence 2 19th-2727 bit.	(CN106085974)_x000D_ The present invention discloses a method and a manufacturing method Pseudovirion Zika virus particles._x000D_ The present invention provides Zika virus Pseudovirion particles, Zika virus coat protein gene of the NS5 Pseudovirion particles to form a package; MS2 bacteriophage MS2 coat protein and phage by mature capsid proteins; Zika virus NS5 gene nucleotide sequence is the s…
74564041	C12Q-001/68/51_x000D_ C12Q-001/68/6_x000D_ C12Q-001/70/1_x000D_ C12Q-2600/16_x000D_ Y02A-050/51_x000D_ Y02A-050/53_x000D_ Y02A-050/60	C12N-015/11_x000D_ C12Q-001/68_x000D_ C12Q-001/70	Biotechnology	CN201610623345	2016CN-0623345	2016-07-29	2016	(CN106086242)_x000D_ Kit for flavivirus quick typing and virus load detection	ZHANG FUCHUN_x000D_ GAO XIUJIE_x000D_ ZHAO LINGZHAI	(CN106086242)_x000D_ 张复春_x000D_ 高秀洁_x000D_ 赵令斋	(CN106086242)_x000D_ ZHANG FUCHUN_x000D_ GAO XIUJIE_x000D_ ZHAO LINGZHAI	GUANGZHOU NO 8 PEOPLE S HOSPITAL	GUANGZHOU NO 8 PEOPLE S HOSPITAL	GUANGZHOU NO 8 PEOPLE S HOSPITAL	(CN106086242)_x000D_ 广州市第八人民医院			(CN106086242)_x000D_ GUANGZHOU NO.8 PEOPLE'S HOSPITAL		CN	ACADEMY	CN					PENDING	PENDING	ALIVE	ALIVE		2036-07-29	Y02A-050/51	C12Q-001/70	1	0	0	0	1		Biotechnology	(CN106086242)_x000D_ PROBE(100,31)_x000D_ RAPID TYPING(100,23)_x000D_ VIRAL LOAD DETECTION(100,21)_x000D_ FLAVIVIRUS GENUS KIT(100,15)_x000D_ PRIMER(100,9)_x000D_ CHIKUNGUNYA VIRUS SPECIFIC PRIMER(100,5)_x000D_ DENGUE VIRUS SPECIFIC PRIMER(100,5)_x000D_ ZIKA VIRUS SPECIFIC PRIMER(100,5)_x000D_ REVERSE PRIMER SEQUENCE(100,4)_x000D_ FLAVIVIRUS GENUS PRIMER(100,3)_x000D_ YELLOW FEVER VIRUS SPECIFIC …	(CN106086242)_x000D_ The invention belongs to the field of microbial molecular detection, and particularly relates to a kit for flavivirus quick typing and virus load detection.The kit for flavivirus quick typing and virus load detection comprises specific primers and probes for flaviviruses, including specific primers and a probe for dengue virus, specific primers and a probe for Zika virus, spe…	(CN106086242)_x000D_ In recent years, developments in molecular biology as in the identification of microorganisms provides a relatively easy and accurate operation of the method, in particular for a flavivirus detection provides a new detection._x000D_ As compared with the prior art, the present invention has the advantages that: the present invention provides for rapid typing of the genus Flavi…	(CN106086242)_x000D_ 1. A method for rapid typing and viral load detection of the flavivirus genus primers and probes, characterized in, primers and probes include dengue virus-specific primers and probes, Zika virus-specific primers and probes, Yellow Fever virus-specific primers and probes, Chikungunya virus-specific primers and probes; Dengue virus-specific forward and reverse primer sequences…	(CN106086242)_x000D_ The present invention provides for the rapid typing and viral load detection of the flavivirus genus kit, of the genus-specific primers and probes include fiaviviruses, specific primers and probes of the flavivirus genus-specific primers and probes include dengue virus, Zika virus-specific primers and probes, primers and probes specific for the yellow fever virus, Chikungunya…
74580611	C07D-277/82_x000D_ C07D-417/04_x000D_ C07D-417/12	A61K-031/41_x000D_ A61K-031/4164_x000D_ C07D-277/82_x000D_ C07D-403/12_x000D_ C07D-417/04_x000D_ C07D-417/12	Organic fine chemistry_x000D_ Pharmaceuticals	US62/159,897P	2015US-62159897	2015-05-11	2015	(US20180086749)_x000D_ Inhibitors of viruses	GOLDEN JENNIFER E_x000D_ CHUNG DONGHOON		(US20180086749)_x000D_ Golden Jennifer E._x000D_ Chung Donghoon	UNIVERSITY OF KANSAS_x000D_ UNIVERSITY OF LOUISVILLE RESEARCH FOUNDATION	UNIVERSITY OF KANSAS_x000D_ UNIVERSITY OF LOUISVILLE RESEARCH FOUNDATION	UNIVERSITY OF KANSAS		UNIVERSITY OF KANSAS LAWRENCE; FROM 2017-11-10	(US20180086749)_x000D_ US NATIONAL INSTITUTES OF HEALTH (NIH); EFFD=2018-02-23	(US20180086749)_x000D_ University of Kansas ([US])_x000D_ University of Louisville Research Foundation, Inc. ([US])_x000D_ (WO2016183093)_x000D_ UNIVERSITY OF KANSAS ([US])_x000D_ UNIVERSITY OF LOUISVILLE RESEARCH FOUNDATION, INC. ([US])	(US20180086749)_x000D_ University of Kansas; University of Louisville Research Foundation, Inc._x000D_ (WO2016183093)_x000D_ UNIVERSITY OF KANSAS; UNIVERSITY OF LOUISVILLE RESEARCH FOUNDATION, INC.	US	ACADEMY;ACADEMY	US	(US20180086749)_x000D_ US_x000D_ (WO2016183093)_x000D_ US	(US20180086749)_x000D_ NAME=University of Kansas , CITY=Lawrence , STATE=KS , COUNTRY=US _x000D_ _x000D_ NAME=University of Louisville Research Foundation, Inc. , CITY=Louisville , STATE=KY , COUNTRY=US _x000D_ _x000D_ (WO2016183093)_x000D_ NAME=UNIVERSITY OF KANSAS 245 Strong Hall 1450 Jayhawk Boulevard Lawrence, Kansas 66045 , POSTCODE=66045 , COUNTRY=US _x000D_ _x000D_ NAME=UNIVERSITY OF LOUIS…	(US20180086749)_x000D_ US	(US20180086749)_x000D_ NAME=Golden Jennifer E. , CITY=Olathe , STATE=KS , COUNTRY=US _x000D_ _x000D_ NAME=Chung Donghoon , CITY=Louisville , STATE=KY , COUNTRY=US _x000D_	PENDING	(US20180086749)_x000D_ PENDING_x000D_ (WO2016183093)_x000D_ PENDING	ALIVE	(US20180086749)_x000D_ ALIVE_x000D_ (WO2016183093)_x000D_ ALIVE		(US20180086749)_x000D_ 2036-05-10_x000D_ (WO2016183093)_x000D_ 2018-11-11	C07D-417/12	C07D-417/12	2	0	3	0	2	(WO2016183093)_x000D_ National States: AE AG AL AM AO AT AU AZ BA BB BG BH BN BR BW BY BZ CA CH CL CN CO CR CU CZ DE DK DM DO DZ EC EE EG ES FI GB GD GE GH GM GT HN HR HU ID IL IN IR IS JP KE KG KN KP KR KZ LA LC LK LR LS LU LY MA MD ME MG MK MN MW MX MY MZ NA NG NI NO NZ OM PA PE PG PH PL PT QA RO RS RU RW SA SC SD SE SG SK SL SM ST SV SY TH TJ TM TN TR TT TZ UA UG US UZ VC VN ZA ZM ZW_x000D_ AR…	Organic fine chemistry_x000D_ Pharmaceuticals	(US20180086749)_x000D_ SOLVATE(100,5)_x000D_ INHIBITING VIRUS(100,1)_x000D_ ZIKA VIRUS(63,20)_x000D_ DISEASE PROPHYLAXIS(57,1)_x000D_ LABELED COMPOUND QUANTITY(56,2)_x000D_ VIRAL INFECTION(53,22)_x000D_ ORTHOMYXOVIRIDAE VIRUS(53,5)_x000D_ PARAMYXOVIRIDAE VIRUS(52,5)_x000D_ ARENAVIRIDAE VIRUS(51,5)_x000D_ CORONAVIRIDAE VIRUS(51,5)_x000D_ RETROVIRIDAE VIRUS(51,5)_x000D_ FILOVIRIDAE VIRUS(50,5)_x000…	(US20180086749)_x000D_ The present technology is directed to compounds, compositions, and methods to treat a viral infection.The compound is according to Formula I or a solvate and/or pharmaceutically acceptable salt thereof.The technology is especially suited to treat Chikungunya virus, Zika virus, Venezuelan equine encephalitis virus, and/or respiratory syncytial virus infection._x000D_ <chemis…	(US20180086749)_x000D_ A detectable or imaging effective quantity is a quantity of a labeled compound of the present technology necessary to be detected by the detection method chosen._x000D_ Given the emergence of new viruses and the rapid spread of emerging viral diseases to previously unaffected geographic areas, there is an urgent need for the identification of agents that more efficiently ta…	(US20180086749)_x000D_ 1. A compound according to Formula I or a solvate and/or pharmaceutically acceptable salt thereof; wherein X1 is NH, S, or O; X2 is N, CH, or C-(unsubstituted alkyl); X3 is S, O, or -- C(R8).dbd.C(R9) -- ; X4 is N or C; R1, R2, R3, R8 and R9 are each independently H, halo, cyano, trifluoromethyl, nitro, pentafluorosulfanyl, or a substituted or unsubstituted alkyl, alkoxy, a…	(US20180086749)_x000D_ Also provided is the use of the compounds in preparing pharmaceutical formulations and medicaments, the use of the compounds in treating a viral infection._x000D_ [0105] In another aspect, the present technology provides methods of identifying a target of interest including contacting the target of interest with a detectable or imaging effective quantity of a labeled compou…
74872003	A61K-039/00_x000D_ A61K-039/015_x000D_ A61K-039/02_x000D_ A61K-039/04_x000D_ A61K-039/12_x000D_ C07K-014/115_x000D_ C12N-015/09_x000D_ Y02A-050/386_x000D_ Y02A-050/39_x000D_ Y02A-050/392_x000D_ Y02A-050/394_x000D_ Y02A-050/412_x000D_ Y02A-050/472	A61K-035/76_x000D_ A61K-039/00_x000D_ A61K-039/015_x000D_ A61K-039/02_x000D_ A61K-039/04_x000D_ A61K-039/09_x000D_ A61K-039/106_x000D_ A61K-039/12_x000D_ A61K-039/125_x000D_ A61K-039/145_x000D_ A61K-039/15_x000D_ A61K-039/155_x000D_ A61K-039/20_x000D_ A61K-039/21_x000D_ A61K-039/215_x000D_ A61K-039/245_x000D_ A61K-039/29_x000D_ A61K-048/00_x000D_ A61P-031/04_x000D_ A61P-031/06_x000D_ A61P-031/12_…	Pharmaceuticals	JP2015119097	2015JP-0119097	2015-06-12	2015	(EP3309251)_x000D_ Human parainfluenza type 2 virus vector and vaccine	NOSAKA TETSUYA_x000D_ TSURUDOME MASATO_x000D_ FUKUMURA MASAYUKI_x000D_ OHTSUKA JUNPEI_x000D_ YUDA MASAO_x000D_ IWANAGA SHIROH	(WO2016199936)_x000D_ 野阪 哲哉 ([JP])_x000D_ 鶴留 雅人 ([JP])_x000D_ 福村 正之 ([JP])_x000D_ 大塚 順平 ([JP])_x000D_ 油田 正夫 ([JP])_x000D_ 岩永 史朗 ([JP])	(EP3309251)_x000D_ NOSAKA, Tetsuya_x000D_ TSURUDOME, Masato_x000D_ FUKUMURA, Masayuki_x000D_ OHTSUKA, Junpei_x000D_ YUDA, Masao_x000D_ IWANAGA, Shiroh	BIOCOMO_x000D_ BIOLOGICAL KEMO_x000D_ MIE UNIVERSITY	BIOCOMO_x000D_ BIOLOGICAL KEMO_x000D_ MIE UNIVERSITY	SEIKO EPSON_x000D_ MIE UNIVERSITY_x000D_ BIOCOMO	(WO2016199936)_x000D_ 国立大学法人三重大学 ([JP])_x000D_ バイオコモ株式会社 ([JP])			(EP3309251)_x000D_ Mie University ([JP])_x000D_ BioComo Inc. ([JP])_x000D_ (WO2016199936)_x000D_ MIE UNIVERSITY ([JP])_x000D_ BIOCOMO INC. ([JP])_x000D_ (JP2016199936W)_x000D_ MIE UNIV_x000D_ BioComo Corporation_x000D_ (CN107849558)_x000D_ MIE UNIVERSITY_x000D_ BIOCOMO INC.	(EP3309251)_x000D_ BioComo Inc.; Mie University_x000D_ (WO2016199936)_x000D_ MIE UNIVERSITY; BIOCOMO INC.	CN	ACADEMY;CORPORATE	JP	(EP3309251)_x000D_ JP_x000D_ (WO2016199936)_x000D_ JP	(EP3309251)_x000D_ NAME=Mie University 1577, Kurimamachiya-cho , CITY=Tsu-shi, Mie 514-8507 , COUNTRY=JP , REG=101274093 _x000D_ _x000D_ NAME=BioComo Inc. 1325 Komono Komono-cho , CITY=Mie-gun, Mie 510-1233 , COUNTRY=JP , REG=101331483 _x000D_ _x000D_ (WO2016199936)_x000D_ NAME=MIE UNIVERSITY 1577, Kurimamachiya-cho, Tsu-shi, Mie 5148507 , POSTCODE=〒5148507 , COUNTRY=JP _x000D_ _x000D_ NAME=BIOCO…	(EP3309251)_x000D_ JP	(EP3309251)_x000D_ NAME=NOSAKA, Tetsuya c/o Mie University Graduate School of Medicine 2-174 Edobashi , CITY=Tsu-shiMie 514-8507 , COUNTRY=JP _x000D_ _x000D_ NAME=TSURUDOME, Masato c/o Mie University Graduate School of Medicine 2-174 Edobashi , CITY=Tsu-shiMie 514-8507 , COUNTRY=JP _x000D_ _x000D_ NAME=FUKUMURA, Masayuki c/o BioComo Inc. 1325 Ooaza Komono Komono-cho , CITY=Mie-gunMie 510-1233 , C…	PENDING	(EP3309251)_x000D_ PENDING_x000D_ (WO2016199936)_x000D_ PENDING_x000D_ (JPWO2016199936)_x000D_ PENDING_x000D_ (CN107849558)_x000D_ PENDING	ALIVE	(EP3309251)_x000D_ ALIVE_x000D_ (WO2016199936)_x000D_ ALIVE_x000D_ (JPWO2016199936)_x000D_ ALIVE_x000D_ (CN107849558)_x000D_ ALIVE		(EP3309251)_x000D_ 2036-06-13_x000D_ (WO2016199936)_x000D_ 2019-09-28_x000D_ (JPWO2016199936)_x000D_ 2036-06-13_x000D_ (CN107849558)_x000D_ 2036-06-13	A61K-039/00	C12N-015/09	4	2	5	0	4	(EP3309251)_x000D_ Contracting States: AL AT BE BG CH CY CZ DE DK EE ES FI FR GB GR HR HU IE IS IT LI LT LU LV MC MK MT NL NO PL PT RO RS SE SI SK SM TR_x000D_ Extension States: BA ME_x000D_ (WO2016199936)_x000D_ National States: AE AG AL AM AO AT AU AZ BA BB BG BH BN BR BW BY BZ CA CH CL CN CO CR CU CZ DE DK DM DO DZ EC EE EG ES FI GB GD GE GH GM GT HN HR HU ID IL IN IR IS JP KE KG KN KP KR KZ L…	Pharmaceuticals	(EP3309251)_x000D_ VIRUS VECTOR(100,42)_x000D_ VACCINE(100,23)_x000D_ HUMAN PARAINFLUENZA(100,1)_x000D_ ANTIGENIC POLYPEPTIDE(99,35)_x000D_ MACROMOLECULAR ANTIGENIC POLYPEPTIDE(74,1)_x000D_ PARAINFLUENZA VIRUS(70,8)_x000D_ ANTIGEN GENE MUTATION(62,1)_x000D_ MACROMOLECULAR ANTIGENIC PEPTIDE(59,4)_x000D_ PARAMYXOVIRIDAE VIRUS SEQUENCE GENE(58,1)_x000D_ THERMODYNAMICALLY STABLE POSTFUSION(56,1)_x000…	(EP3309251)_x000D_ The present invention relates to: a virus vector, which can effectively transfer a macromolecular antigenic peptide into target cells while maintaining a three-dimensional structure that is required for functioning as an antigen; and a vaccine utilizing the vector.Specifically, disclosed are: a virus vector, in which a nucleic acid encoding an antigenic polypeptide is integrate…	(EP3309251)_x000D_ However, the vector of the present invention does not have such problem, and it has an advantage that no mutation of antigen gene occurs in a recipient._x000D_ When F protein having the prefusion structure is used as an antigen, deletion of the TM and CT sequences of F protein leads to easy recovery but an unstable structure._x000D_ Therefore, there is a strong need for develop…	(EP3309251)_x000D_ 1. A non-transmissible virus vector in which a nucleic acid encoding an antigenic polypeptide is inserted immediately 5' upstream of HN gene of an F gene-defective Paramyxoviridae virus gene, wherein the antigenic polypeptide is expressed as a fusion protein of 130 or more amino acid residues, fused with a TM sequence and/or a CT sequence derived from the virus.	(EP3309251)_x000D_ Specifically, the present invention relates to the following (1) to (9)_x000D_ The present invention relates to a virus vector wherein a nucleic acid encoding an antigen polypeptide is integrated immediately 5' upstream of HN gene of an F gene-defective Paramyxoviridae virus genome gene, wherein the antigenic polypeptide is expressed as a fusion protein of 130 or more amino aci…	(WO2016199936)_x000D_ International Search Report [Examiner]_x000D_ -BUKREYEV A ET AL.: "Chimeric human parainfluenza virus bearing the Ebola virus glycoprotein as the sole surface protein is immunogenic and highly protective against Ebola virus challenge.", VIROLOGY, vol. 383, no. 2, 2009, pages 348 - 361, XP025865847CC=XP; XP025865847 (Cat. Y)_x000D_ -STEGLICH C ET AL.: "Chimeric newcastle dise…
74931099	C12N-015/86_x000D_ C12N-2740/16022_x000D_ C12N-2740/16031_x000D_ C12N-2760/16022_x000D_ C12N-2760/16031_x000D_ C12N-2770/36143	A61K-035/76_x000D_ C07K-014/08_x000D_ C12N-015/09_x000D_ C12N-015/40_x000D_ C12N-015/86	Pharmaceuticals	US62/182,104P	2015US-62182104	2015-06-19	2015	(EP3310368)_x000D_ Sindbis control virus	GARLICK RUSSELL_x000D_ HUANG CATHERINE_x000D_ ANEKELLA BHARATHI_x000D_ LI JONATHAN		(EP3310368)_x000D_ GARLICK, Russell_x000D_ HUANG, Catherine_x000D_ ANEKELLA, Bharathi_x000D_ LI, Jonathan	SERACARE LIFE SCIENCES	SERACARE LIFE SCIENCES	SERACARE LIFE SCIENCES				(EP3310368)_x000D_ Seracare Life Sciences Inc. ([US])_x000D_ (WO2016204983)_x000D_ SERACARE LIFE SCIENCES, INC. ([US])	(EP3310368)_x000D_ Seracare Life Sciences Inc._x000D_ (WO2016204983)_x000D_ SERACARE LIFE SCIENCES, INC.	EP	CORPORATE	US	(EP3310368)_x000D_ US_x000D_ (WO2016204983)_x000D_ US	(EP3310368)_x000D_ NAME=Seracare Life Sciences Inc. 37 Birch Street , CITY=Milford, MA 01757 , COUNTRY=US , REG=101632110 _x000D_ _x000D_ (WO2016204983)_x000D_ NAME=SERACARE LIFE SCIENCES, INC. 37 Birch Street Milford, MA 01757 , POSTCODE=01757 , COUNTRY=US _x000D_	(EP3310368)_x000D_ US	(EP3310368)_x000D_ NAME=GARLICK, Russell 22 Trout Pond Lane , CITY=Needham, MA 02492 , COUNTRY=US _x000D_ _x000D_ NAME=HUANG, Catherine 4939 Pale Morning Dun Road , CITY=Elkridge, MD 21075 , COUNTRY=US _x000D_ _x000D_ NAME=ANEKELLA, Bharathi 22480 Castle Oak Road , CITY=Clarksburg, MD 20871 , COUNTRY=US _x000D_ _x000D_ NAME=LI, Jonathan 151 Wallis Road , CITY=Chestnut Hill, MA 02467 , COUNTRY=US …	PENDING	(EP3310368)_x000D_ PENDING_x000D_ (WO2016204983)_x000D_ PENDING	ALIVE	(EP3310368)_x000D_ ALIVE_x000D_ (WO2016204983)_x000D_ ALIVE		(EP3310368)_x000D_ 2036-06-03_x000D_ (WO2016204983)_x000D_ 2018-12-19	C12N-015/86	A61K-035/76	2	0	6	0	2	(EP3310368)_x000D_ Contracting States: AL AT BE BG CH CY CZ DE DK EE ES FI FR GB GR HR HU IE IS IT LI LT LU LV MC MK MT NL NO PL PT RO RS SE SI SK SM TR_x000D_ Extension States: BA ME_x000D_ (WO2016204983)_x000D_ National States: AE AG AL AM AO AT AU AZ BA BB BG BH BN BR BW BY BZ CA CH CL CN CO CR CU CZ DE DK DM DO DZ EC EE EG ES FI GB GD GE GH GM GT HN HR HU ID IL IN IR IS JP KE KG KN KP KR KZ L…	Pharmaceuticals	(WO2016204983)_x000D_ REPLICATION(100,103)_x000D_ DEFICIENT RECOMBINANT SINDBIS VIRUS(100,47)_x000D_ DEFICIENT SINDBIS VIRUS(53,37)_x000D_ RNA GENOME(39,43)_x000D_ FUNCTIONAL SINDBIS NONSTRUCTURAL PROTEIN(28,3)_x000D_ HETEROLOGOUS RNA SEQUENCE(17,45)_x000D_ NUCLEOTIDE(15,63)_x000D_ RETROVIRUS SEQUENCE(14,18)_x000D_ ORF ENCODING(12,11)_x000D_ REPLICATION RNA GENOME(12,8)_x000D_ SINDBIS STRUCTURAL …	(EP3310368)_x000D_ Disclosed are compositions and methods related to replication deficient Sindbis viruses that are able to function as controls for nucleic acid diagnostic assays (e.g., nucleic acid sequencing based assays and/or nucleic acid amplification based assays).	(WO2016204983)_x000D_ Such controls can be natural material derived from infected patients, which have the advantage of behaving very similarly to a clinical sample._x000D_ This offers a technical advantage over certain other technologies used to package RNA controls, such as Armored RNA, which are based on MS2 bacteriophage technology and produce recombinant RNA molecules as small as 900 bases i…	(WO2016204983)_x000D_ 1. A replication deficient recombinant Sindbis virus comprising a RNA genome comprising: an open reading frame (ORF) encoding functional Sindbis non-structural proteins; and a heterologous RNA sequence._x000D_ 43. The replication deficient recombinant Sindbis virus of 42, wherein the HIV-1 sequence comprises a sequence identical to nucleotides 1900 through 5400 of the HXB2 s…
74954856		C12N-015/11_x000D_ C12Q-001/68_x000D_ C12Q-001/70_x000D_ C12R-001/93	Biotechnology	CN201610688556	2016CN-0688556	2016-08-19	2016	(CN106244726)_x000D_ Zika virus loop-mediated isothermal amplification detection kit and using method	YIN HONG_x000D_ ZOU MINGQIANG_x000D_ XUE QIANG	(CN106244726)_x000D_ 殷宏_x000D_ 邹明强_x000D_ 薛强	(CN106244726)_x000D_ YIN HONG_x000D_ ZOU MINGQIANG_x000D_ XUE QIANG	CHINA INSPECTION TECHNOLOGIES	CHINA INSPECTION TECHNOLOGIES	CHINA INSPECTION TECHNOLOGIES	(CN106244726)_x000D_ 中检国研（北京）科技有限公司			(CN106244726)_x000D_ CHINA INSPECTION TECHNOLOGIES CO.LTD(CITC)		CN	CORPORATE	CN					PENDING	PENDING	ALIVE	ALIVE		2036-08-19		C12Q-001/70	1	1	0	0	1		Biotechnology	(CN106244726)_x000D_ ZIKA VIRUS(100,26)_x000D_ PRIMER(100,14)_x000D_ ISOTHERMAL AMPLIFICATION PRIMER(100,13)_x000D_ LOOP(100,13)_x000D_ ISOTHERMAL AMPLIFICATION(100,11)_x000D_ KIT(100,9)_x000D_ OUTER PRIMER(100,7)_x000D_ LOOP PRIMER(100,5)_x000D_ GENE LOOP(100,4)_x000D_ LOOP MEDIATED ISOTHERMAL AMPLIFICATION(100,4)_x000D_ ZIKA VIRUS OUTBREAK(100,3)_x000D_ DETECTION TIME(100,2)_x000D_ ZIKA VIRUS E…	(CN106244726)_x000D_ The invention discloses a loop-mediated isothermal amplification kit for detecting Zika viruses and a using method of the kit.The kit is characterized by consisting of a Zika virus envelop protein (E) gene loop-mediated isothermal amplification primer mixed solution, a loop-mediated isothermal amplification reaction pre-mixed solution, a Zika virus E gene positive quality con…	(CN106244726)_x000D_ In addition, Brazilian Ministry for example 356 also has been notified about 12 January 2016 may be the case of microcephaly associated with infection ZIKV; currently, Africa, America, Asia and the Pacific region has Zika virus epidemic outbreaks of disease, or to further provide ZIKV expansion and spread Cross-border propagation trend, cause significant attention from around…	(CN106244726)_x000D_ 1. A set of the loop mediated isothermal amplification primer set for detecting Zika virus, Zika virus envelope protein by (E) gene loop mediated isothermal amplification primer groups, characterized in, since May 2015 can be used in the middle, Zika virus outbreak of South America loop mediated isothermal amplification reaction at the time of detection; Zika virus gene loop …	(CN106244726)_x000D_ The present invention discloses a method for the detection of a loop mediated isothermal amplification kit Zika virus and its use method._x000D_ The present invention relates to a kit for rapid detection of the virus primer sets, kits and methods of use, and more particularly to a kit for detection since May 2015 in the, loop mediated isothermal amplification primer set of th…
74986723	A61K-039/12_x000D_ A61K-039/145_x000D_ A61K-2039/5258_x000D_ A61P-031/14_x000D_ C07K-014/005_x000D_ C12N-007/00_x000D_ C12N-009/50/6_x000D_ C12N-2770/24023_x000D_ C12N-2770/24034_x000D_ C12N-2770/24134_x000D_ Y02A-050/386_x000D_ Y02A-050/388_x000D_ Y02A-050/39_x000D_ Y02A-050/392_x000D_ Y02A-050/394	A61K-039/12_x000D_ A61K-039/145_x000D_ A61K-047/22_x000D_ A61P-031/14_x000D_ C07K-014/005_x000D_ C12N-007/00_x000D_ C12N-009/50	Pharmaceuticals	US62/184,738P	2015US-62184738	2015-06-25	2015	(US20180177859)_x000D_ Flavivirus and alphavirus virus-like particles (vlps)	GALARZA JOSE M_x000D_ BOIGARD HELENE_x000D_ MARTIN GEORGE		(US20180177859)_x000D_ GALARZA Jose M._x000D_ BOIGARD Helene_x000D_ MARTIN George	TECHNOVAX	TECHNOVAX	TECHNOVAX		MARTIN GEORGE; FROM 2017-03-20 TO 2017-03-20_x000D_ TECHNOVAX; FROM 2017-03-20_x000D_ GALARZA JOSE M; FROM 2017-12-20 TO 2018-03-21_x000D_ BOIGARD HÃ**LÃ**NE; FROM 2017-12-20 TO 2018-03-27	(US20180177859)_x000D_ TECHNOVAX; EFFD=2018-04-19	(US20180177859)_x000D_ TECHNOVAX, INC. ([US])_x000D_ (WO2016210127)_x000D_ TECHNOVAX, INC. ([US])	(US20180177859)_x000D_ TECHNOVAX, INC._x000D_ (WO2016210127)_x000D_ TECHNOVAX, INC.	US	CORPORATE	US	(US20180177859)_x000D_ US_x000D_ (WO2016210127)_x000D_ US	(US20180177859)_x000D_ NAME=TECHNOVAX, INC. , CITY=Elmsford , STATE=NY , COUNTRY=US , ATYP=US Company _x000D_ _x000D_ (WO2016210127)_x000D_ NAME=TECHNOVAX, INC. 765 Old Saw Mill River Road Tarrytown, New York 10591 , POSTCODE=10591 , COUNTRY=US _x000D_	(US20180177859)_x000D_ US	(US20180177859)_x000D_ NAME=GALARZA Jose M. , CITY=Elmsford , STATE=NY , COUNTRY=US _x000D_ _x000D_ NAME=BOIGARD Helene , CITY=Elmsford , STATE=NY , COUNTRY=US _x000D_ _x000D_ NAME=MARTIN George , CITY=Elmsford , STATE=NY , COUNTRY=US _x000D_	PENDING	(US20180177859)_x000D_ PENDING_x000D_ (WO2016210127)_x000D_ PENDING	ALIVE	(US20180177859)_x000D_ ALIVE_x000D_ (WO2016210127)_x000D_ ALIVE		(US20180177859)_x000D_ 2036-06-23_x000D_ (WO2016210127)_x000D_ 2018-12-25	A61K-039/12	A61K-039/12	2	5	5	0	2	(WO2016210127)_x000D_ National States: AE AG AL AM AO AT AU AZ BA BB BG BH BN BR BW BY BZ CA CH CL CN CO CR CU CZ DE DK DM DO DZ EC EE EG ES FI GB GD GE GH GM GT HN HR HU ID IL IN IR IS JP KE KG KN KP KR KZ LA LC LK LR LS LU LY MA MD ME MG MK MN MW MX MY MZ NA NG NI NO NZ OM PA PE PG PH PL PT QA RO RS RU RW SA SC SD SE SG SK SL SM ST SV SY TH TJ TM TN TR TT TZ UA UG US UZ VC VN ZA ZM ZW_x000D_ AR…	Pharmaceuticals	(US20180177859)_x000D_ FLAVIVIRUS(100,33)_x000D_ ALPHAVIRUS VIRUS LIKE PARTICLE(100,1)_x000D_ POORLY NEUTRALIZING ANTIBODY(100,1)_x000D_ FLAVIVIRUS VIRUS SEROTYPE(88,1)_x000D_ ANTIGENIC SIMILARITY(74,1)_x000D_ FLAVIVIRUS STRUCTURAL PROTEIN(72,2)_x000D_ TRANSMEMBRANE DOMAIN(71,14)_x000D_ FURIN PROTEASE CLEAVAGE(63,4)_x000D_ SEQUENCE ENCODING(61,19)_x000D_ FLAVIVIRUS CLADE(60,2)_x000D_ MODIFIED ANT…	(US20180177859)_x000D_ Described herein are flavivirus virus-like particles (VLPs) that display on their surfaces antigenic flavivirus proteins.Also described are methods of making and using these VLPs.	(US20180177859)_x000D_ The presence of a low concentration of poorly neutralizing antibodies produced after the primary infection, appears to heighten infection of Fc-receptor bearing cells, increasing virus replication and clinical signs by the mechanism of antibody-dependent enhancement (ADE) of disease._x000D_ The VLPs described herein are devoid of viral genetic material and therefore unable …	(US20180177859)_x000D_ 1. A virus-like particle (VLP) comprising at least one flavivirus structural protein; and at least one non-structural flavivirus protein.	(US20180177859)_x000D_ [0013] Thus, the invention describes a novel approach for Zika, dengue and/or chickungunya virus-like particle (VLP) development._x000D_ Also described are methods of making and using these VLPs._x000D_ Also described are compositions comprising these VLPs, as well as methods for making and using these VLPs.	(US20180177859)_x000D_ Examiner references_x000D_ -US 201 2/01 2871 3 Al, Pub. 05/24/2012, APPLICANT-CITED PRIOR ART; hereafter20"Pugachev" (Cat. 102)
74986906	C12N-005/00/25_x000D_ C12N-005/0618_x000D_ C12N-005/0619_x000D_ C12N-005/0622_x000D_ C12N-2500/05_x000D_ C12N-2500/24_x000D_ C12N-2500/32_x000D_ C12N-2500/34_x000D_ C12N-2500/38_x000D_ C12N-2500/60_x000D_ C12N-2502/081_x000D_ C12N-2502/086_x000D_ C12N-2506/02_x000D_ C12N-2506/03_x000D_ C12N-2506/45_x000D_ G01N-033/50/58	C12N-005/00_x000D_ C12N-005/0735_x000D_ C12N-005/0789_x000D_ C12N-005/079_x000D_ G01N-033/50	Analysis of biological materials_x000D_ Biotechnology	US62/184,084P	2015US-62184084	2015-06-24	2015	(US20180179494)_x000D_ Culture medium for generating microglia from pluripotent stem cells and related methods	MUFFAT JULIEN_x000D_ LI YUN_x000D_ JAENISCH RUDOLF		(US20180179494)_x000D_ MUFFAT Julien_x000D_ LI Yun_x000D_ JAENISCH Rudolf	WHITEHEAD INSTITUTE FOR BIOMEDICAL RESEARCH	WHITEHEAD INSTITUTE FOR BIOMEDICAL RESEARCH	WHITEHEAD INSTITUTE FOR BIOMEDICAL RESEARCH				(US20180179494)_x000D_ Whitehead Institute for Biomedical Research ([US])_x000D_ (WO2016210313)_x000D_ WHITEHEAD INSTITUTE FOR BIOMEDICAL RESEARCH ([US])	(US20180179494)_x000D_ Whitehead Institute for Biomedical Research_x000D_ (WO2016210313)_x000D_ WHITEHEAD INSTITUTE FOR BIOMEDICAL RESEARCH	US	ACADEMY	US	(US20180179494)_x000D_ US_x000D_ (WO2016210313)_x000D_ US	(US20180179494)_x000D_ NAME=Whitehead Institute for Biomedical Research , CITY=Cambridge , STATE=MA , COUNTRY=US _x000D_ _x000D_ (WO2016210313)_x000D_ NAME=WHITEHEAD INSTITUTE FOR BIOMEDICAL RESEARCH Nine Cambridge Center Cambridge, MA 02142-1479 , POSTCODE=02142-1479 , COUNTRY=US _x000D_	(US20180179494)_x000D_ US	(US20180179494)_x000D_ NAME=MUFFAT Julien , CITY=Cambridge , STATE=MA , COUNTRY=US _x000D_ _x000D_ NAME=LI Yun , CITY=Cambridge , STATE=MA , COUNTRY=US _x000D_ _x000D_ NAME=JAENISCH Rudolf , CITY=Cambridge , STATE=MA , COUNTRY=US _x000D_	PENDING	(US20180179494)_x000D_ PENDING_x000D_ (WO2016210313)_x000D_ PENDING	ALIVE	(US20180179494)_x000D_ ALIVE_x000D_ (WO2016210313)_x000D_ ALIVE		(US20180179494)_x000D_ 2036-06-24_x000D_ (WO2016210313)_x000D_ 2019-12-14	C12N-005/0622	C12N-005/079	2	0	2	0	2	(WO2016210313)_x000D_ National States: AE AG AL AM AO AT AU AZ BA BB BG BH BN BR BW BY BZ CA CH CL CN CO CR CU CZ DE DK DM DO DZ EC EE EG ES FI GB GD GE GH GM GT HN HR HU ID IL IN IR IS JP KE KG KN KP KR KZ LA LC LK LR LS LU LY MA MD ME MG MK MN MW MX MY MZ NA NG NI NO NZ OM PA PE PG PH PL PT QA RO RS RU RW SA SC SD SE SG SK SL SM ST SV SY TH TJ TM TN TR TT TZ UA UG US UZ VC VN ZA ZM ZW_x000D_ AR…	Analysis of biological materials_x000D_ Biotechnology	(US20180179494)_x000D_ PLURIPOTENT STEM CELL(100,50)_x000D_ CULTURE MEDIUM(100,24)_x000D_ VIRAL REPLICATION(100,3)_x000D_ GENERATING MICROGLIA(100,1)_x000D_ NEURAL PROGENITOR CELL(92,11)_x000D_ PYRUVATE SALT(77,15)_x000D_ INORGANIC SALT(65,15)_x000D_ LOU GHERIG DISEASE(65,3)_x000D_ PUTRESCINE DIHYDROCHLORIDE(60,19)_x000D_ NERVE CELL CLUSTER(58,2)_x000D_ TRANSFERRIN(57,27)_x000D_ BUFFERING AGENT(5…	(US20180179494)_x000D_ Described herein are cell culture media useful for the differentiation of human pluripotent stem cells into microglia.The methods described herein relate to in vitro generation of expandable, bankable, microglial cells by directed differentiation from human pluripotent stem cells (induced or embryonic).Using only defined cell culture media, differentiation of pluripotent st…	(US20180179494)_x000D_ [0005] The invention provides culture media useful for differentiating pluripotent stem cells into microglial cells._x000D_ Given the potential applications of this technology, there exists a need to develop reliable means of generating human microglial cells from human pluripotent stem cells._x000D_ [0139] It will be appreciated that certain of the components may be provid…	(US20180179494)_x000D_ 1. A culture medium, comprising: one or more amino acids; one or more vitamins; one or more inorganic salts; glucose or galactose; buffering agent; serum albumin; transferrin; sodium chloride; a pyruvate salt; glutamine; biotin; ascorbic acid; and lactic acid, or a salt thereof; wherein the osmolarity of the medium is at least 275 mOsm._x000D_ 36. A culture medium comprisin…	(US20180179494)_x000D_ [0006] The invention also provides methods for differentiating a pluripotent stem cell into a microglial cell._x000D_ [0009] The invention also provides cell culture kits, comprising:_x000D_ [0008] The invention also provides methods of culturing a neural progenitor cell from a pluripotent stem cell, comprising: a) contacting a pluripotent stem cell with a culture medium co…	(WO2016210313)_x000D_ International Search Report [Examiner]_x000D_ -ANDERSSON, ANNA K.; ET AL.: "Lactate induces tumour necrosis factor-alpha, interleukin-6 and interleukin-lbeta release in microglial-and astroglial- enriched primary cultures.", JOURNAL OF NEUROCHEMISTRY, vol. 93, no. 5, 2005, pages 1327 - 1333., XP055341650, Retrieved from the Internet <URL:http://onlinelibrary. wiley .com/ doi…
75057573	A61K-039/00_x000D_ A61K-039/395_x000D_ C07K-016/10_x000D_ C07K-016/10/81_x000D_ C07K-2317/52_x000D_ C07K-2317/56_x000D_ C07K-2317/92_x000D_ C12N-005/10_x000D_ C12N-015/85	A61K-039/395_x000D_ A61P-031/14_x000D_ C07K-016/10_x000D_ C12N-005/10_x000D_ C12N-015/13_x000D_ C12N-015/85	Pharmaceuticals	CN201610649447	2016CN-0649447	2016-08-10	2016	(WO201828635)_x000D_ Humanized monoclonal antibody for zika virus and applications thereof	GAO FU_x000D_ YAN JINGHUA_x000D_ WANG QIHUI_x000D_ TONG ZHOU	(WO201828635)_x000D_ 高福 ([CN])_x000D_ 严景华 ([CN])_x000D_ 王奇慧 ([CN])_x000D_ 仝舟 ([CN])	(WO201828635)_x000D_ GAO, Fu_x000D_ YAN, Jinghua_x000D_ WANG, Qihui_x000D_ TONG, Zhou	INSTITUTE OF MICROBIOLOGY CHINESE ACADEMY OF SCIENCES_x000D_ INSTITUTE OF MICROBIOLOGY OF CHINESE ACADEMY OF SCIENCE	INSTITUTE OF MICROBIOLOGY CHINESE ACADEMY OF SCIENCES_x000D_ INSTITUTE OF MICROBIOLOGY OF CHINESE ACADEMY OF SCIENCE	INSTITUTE OF MICROBIOLOGY OF CHINESE ACADEMY OF SCIENCE	(WO201828635)_x000D_ 中国科学院微生物研究所 ([CN])			(WO201828635)_x000D_ INSTITUTE OF MICROBIOLOGY OF CHINESE ACADEMY OF SCIENCE ([CN])_x000D_ (CN106279409)_x000D_ INSTITUTE OF MICROBIOLOGY CHINESE ACADEMY OF SCIENCES	(WO201828635)_x000D_ INSTITUTE OF MICROBIOLOGY OF CHINESE ACADEMY OF SCIENCE	CN	ACADEMY	CN	(WO201828635)_x000D_ CN	(WO201828635)_x000D_ NAME=INSTITUTE OF MICROBIOLOGY OF CHINESE ACADEMY OF SCIENCE Building 3, No.1 West Beichen Road Chaoyang District, Beijing 100101 , POSTCODE=100101 , COUNTRY=CN _x000D_	(WO201828635)_x000D_ CN	(WO201828635)_x000D_ NAME=GAO, Fu Building 3, No.1 West Beichen Road Chaoyang District, Beijing 100101 , POSTCODE=100101 , COUNTRY=CN _x000D_ _x000D_ NAME=YAN, Jinghua Building 3, No.1 West Beichen Road Chaoyang District, Beijing 100101 , POSTCODE=100101 , COUNTRY=CN _x000D_ _x000D_ NAME=WANG, Qihui Building 3, No.1 West Beichen Road Chaoyang District, Beijing 100101 , POSTCODE=100101 , COUNTRY=C…	PENDING	(WO201828635)_x000D_ PENDING_x000D_ (CN106279409)_x000D_ PENDING	ALIVE	(WO201828635)_x000D_ ALIVE_x000D_ (CN106279409)_x000D_ ALIVE		(WO201828635)_x000D_ 2020-02-10_x000D_ (CN106279409)_x000D_ 2036-08-10	A61K-039/395	C07K-016/10	2	1	2	12	2	(WO201828635)_x000D_ National States: AE AG AL AM AO AT AU AZ BA BB BG BH BN BR BW BY BZ CA CH CL CN CO CR CU CZ DE DJ DK DM DO DZ EC EE EG ES FI GB GD GE GH GM GT HN HR HU ID IL IN IR IS JO JP KE KG KH KN KP KR KW KZ LA LC LK LR LS LU LY MA MD ME MG MK MN MW MX MY MZ NA NG NI NO NZ OM PA PE PG PH PL PT QA RO RS RU RW SA SC SD SE SG SK SL SM ST SV SY TH TJ TM TN TR TT TZ UA UG US UZ VC VN ZA ZM Z…	Pharmaceuticals	(WO201828635)_x000D_ MONOCLONAL ANTIBODY ZIKA VIRUS(100,1)_x000D_ ANTIBODY(64,34)_x000D_ AMINOACID INTERACTION(60,3)_x000D_ PROTEIN(59,5)_x000D_ RESTRICTION SITE SEQUENCE(53,2)_x000D_ CASSETTE CARRIER RECOMBINATION(52,1)_x000D_ E ZIKA VIRUS(50,3)_x000D_ ANTIBODY NEUTRALIZATION(49,6)_x000D_ ZIKA VIRUS(46,8)_x000D_ GENE SEQUENCE EXPRESSION(43,1)_x000D_ ANTIGEN ANTIBODY(42,2)_x000D_ GENE ENCODING SE…	(WO201828635)_x000D_ A humanized monoclonal antibody for Zika virus, and applications thereof, related to the technical field of medicine.Using Zika E protein expressed by E. coli as an antigen, selecting from PBMCs of a convalescing Zika patient a memory B cell capable of specifically binding to Zika E protein by means of flow sorting, then performing RT-PCR on the single selected B cell, obtain…	(WO201828635)_x000D_ However, lack of effective vaccines against the virus is still well as treatment options.	(WO201828635)_x000D_ An antibody, characterized in, antibody: A) with the first protein SEQ ID NO:21 to 283 46(VAL), 47(THR), 52(ASN), 136(GLU), 138(ARG), 140(MET), 156(THR), 158(HIS), 159(GLU), 166(LYS), 168(GLU), 259(GLU), 276(GLU), 277(MET), 278(ASP), 280(ALA), 281(LYS) and the E Zika virus (ARG) amino acid interaction; or, B) with the first protein SEQ ID NO:21 to 279 64(SER), 65(ILE), 66(SER…	(WO201828635)_x000D_ Is an object of the present invention has a protective effect of the specific identification of a new ZIKV neutralizing antibodies._x000D_ Object of the present invention is to provide a 1st of the antibodies, antibody:_x000D_ The present invention relates to a human monoclonal antibody Zika virus and their use, which belongs to the technical field of medicine.	(WO201828635)_x000D_ International Search Report [Examiner]_x000D_ -WANG, Q. H. ET AL.: "Molecular determinants of human neutralizing antibodies isolated from a patient infected with Zika virus", SCIENCE TRANSLATIONAL MEDICINE, vol. 8, 14 December 2016 (2016-12-14), pages 369, XP055436624CC=XP; XP055436624 (Cat. P,X)_x000D_ -DAI, L. P. ET AL.: "Structures of the Zika Virus Envelope Protein and It…
75061989		C12N-015/11_x000D_ C12Q-001/68_x000D_ C12Q-001/70	Biotechnology	CN201610786605	2016CN-0786605	2016-08-31	2016	(CN106282410)_x000D_ ZIKV-specific detection target sequence, plasmid standard molecule and detection kit thereof	XIE TIAN_x000D_ YIN QINGQING_x000D_ LIU ZHUANZHUAN_x000D_ ZHOU XIAOHONG_x000D_ CHEN XIAOGUANG	(CN106282410)_x000D_ 谢甜_x000D_ 尹庆庆_x000D_ 刘转转_x000D_ 周晓红_x000D_ 陈晓光	(CN106282410)_x000D_ XIE TIAN_x000D_ YIN QINGQING_x000D_ LIU ZHUANZHUAN_x000D_ ZHOU XIAOHONG_x000D_ CHEN XIAOGUANG	SOUTHERN MEDICAL UNIVERSITY	SOUTHERN MEDICAL UNIVERSITY	SOUTHERN MEDICAL UNIVERSITY	(CN106282410)_x000D_ 南方医科大学			(CN106282410)_x000D_ SOUTHERN MEDICAL UNIVERSITY		CN	ACADEMY	CN					PENDING	PENDING	ALIVE	ALIVE		2036-08-31		C12Q-001/70	1	0	0	0	1		Biotechnology	(CN106282410)_x000D_ ZIKA VIRUS(100,11)_x000D_ TARGET SEQUENCE(100,6)_x000D_ PLASMID STANDARD MOLECULE(100,5)_x000D_ ZIKA VIRUS SPECIFIC DETECTION(100,3)_x000D_ DETECTION KIT(100,2)_x000D_ ENGINEERED BACTERIA STRAIN(100,1)_x000D_ TARGET SEQUENCE SPECIFIC DETECTION(100,1)_x000D_ FLUORESCENT QUANTITATIVE PCR(81,5)_x000D_ REALTIME PCR PRIMER(77,3)_x000D_ DETECTION KIT PLASMID(72,1)_x000D_ WILD MOSQU…	(CN106282410)_x000D_ The invention discloses a ZIKV-specific detection target sequence, a plasmid standard molecule and a nucleic acid detection kit thereof.The plasmid standard molecule is a detection target sequence with the base composition SEQ ID NO:1.The nucleic acid detection kit is composed of a nucleic acid detection nested PCR (polymerase chain reaction) primer system composed of SEQ ID …	(CN106282410)_x000D_ The present invention is to provide a technical solution needs to be addressed one of the detected target sequence specific nucleic acid Zika virus.	(CN106282410)_x000D_ 1. One Zika virus specific detection of target sequences, wherein, with SEQ ID NO: 1 to the nucleotide composition._x000D_ 2. Claim 1 Zika virus specific detection of target sequences with a composition comprising a recombinant plasmid or plasmid standard molecule or a reference material or engineered bacteria strain._x000D_ 3. Claim 1 of the target sequence-specific detectio…	(CN106282410)_x000D_ Another object of the present invention is to provide ZIKV-specific nucleic acid detection kit._x000D_ Another object of the present invention is to provide a recombinant plasmid or plasmid standard molecular or a reference material or E.coli strain engineering bacteria._x000D_ The present invention discloses a specific detection target ZIKV, standard molecule and a nucleic a…
75106288	A01N-025/02_x000D_ A01N-025/18_x000D_ A01N-031/06_x000D_ A01N-065/28	A01N-025/02_x000D_ A01N-025/18_x000D_ A01N-031/06_x000D_ A01N-065/28_x000D_ A01P-017/00	Basic materials chemistry	GB201617161	2016GB-0017161	2016-10-10	2016	(GB2559537)_x000D_ Insect repellent composition and method of use	JOHN HYWEL DAVIES_x000D_ JOHN MOSES		(GB2559537)_x000D_ John Hywel Davies_x000D_ John Moses	NEO INNOVA HEALTHCARE	NEO INNOVA HEALTHCARE	NEO INNOVA HEALTHCARE				(GB201617161)_x000D_ Neo-Innova Healthcare Limited_x000D_ (GB2559537)_x000D_ Neo-Innova Healthcare Limited		GB	CORPORATE	GB					PENDING	PENDING	ALIVE	ALIVE		2036-10-10	A01N-031/06	A01N-031/06	1	0	3	0	1		Basic materials chemistry	(GB2559537)_x000D_ INSECT REPELLENT(100,115)_x000D_ SCOTTISH HIGHLAND MIDGE(87,7)_x000D_ DELIVERY VEHICLE(56,22)_x000D_ ZIKA VIRUS PREVENTION(56,3)_x000D_ CULEX MOSQUITO(53,7)_x000D_ VANILLIN(41,66)_x000D_ VANILLIN RATHER OVERWHELMING SMELL(39,1)_x000D_ INDIAN SUBCONTINENT(38,1)_x000D_ SOLE INSECT REPELLENT(37,5)_x000D_ FINISHED FORMULATION SMELL(37,1)_x000D_ DIOL(35,50)_x000D_ ZIKA VIRUS(35,7)_x…	(GB2559537)_x000D_ An insect repellent composition comprising p-menthane-3,8-diol, vanillin, an antioxidant that prevents discolouration of said vanillin when said composition is stored at 54 °C for 14 days and a delivery vehicle is provided.The delivery vehicle is preferably water and at least one alcohol, preferably isopropyl alcohol.The antioxidant is preferably sodium bisulphite.An insect rep…	(GB2559537)_x000D_ The present invention thus clearly provides advantages compared to the prior art._x000D_ However, of greater general health importance in terms of clinical mortality, certain mosquito species are well known vectors of serious diseases including the greatest "biters"/killers of children (malaria) and recent years have seen major increases in mortality associated with other serio…	(GB2559537)_x000D_ 1. An insect repellent composition comprising p-methane-3,8-diol, vanillin, an antioxidant that prevents discoloration of said vanillin when said composition is stored at 54 C for 14 days and a delivery vehicle._x000D_ 2. An insect repellent composition comprising p-methane-3,8-diol as the sole insect repellent, vanillin and a delivery vehicle._x000D_ 3. An insect repellent com…	(GB2559537)_x000D_ Furthermore, the present inventors have found that the natural oil PMD can achieve the minimum CPT target for 12 hours._x000D_ The present invention is concerned with an insect repellent composition and a method of using the same to repel insects over an extended period of time._x000D_ The present invention is concerned with an insect repellent composition and a method of using…	(GB2559537)_x000D_ Search Report references [Examiner]_x000D_ -BR PI0900780 A2
75112639	C12N-2770/24011_x000D_ C12Q-001/70/1_x000D_ C12Q-2521/107_x000D_ C12Q-2561/101_x000D_ C12Q-2561/113_x000D_ C12Q-2563/107	C12Q-001/70	Biotechnology	KR20160059021	2016KR-0059021	2016-05-13	2016	(KR101692436)_x000D_ A primer set for diagnosing Zika virus a kit for diagnosing Zika virus comprising the same and a method of diagnosing Zika virus using the same	JEONG YOUNG EUI_x000D_ LEE WON JA_x000D_ JANG SOO YEON_x000D_ CHA GO WOON_x000D_ CHO JUNG EUN_x000D_ LEE EUN JU	(KR101692436)_x000D_ 정영의_x000D_ 이원자_x000D_ 장수연_x000D_ 차고운_x000D_ 조정은_x000D_ 이은주	(KR101692436)_x000D_ JEONG, YOUNG EUI_x000D_ LEE, WON JA_x000D_ JANG, SOO YEON_x000D_ CHA, GO WOON_x000D_ CHO, JUNG EUN_x000D_ LEE, EUN JU	KOREA CENTER FOR DISEASE CONTROL & PREVENTION	KOREA CENTER FOR DISEASE CONTROL & PREVENTION	KOREA CENTER FOR DISEASE CONTROL & PREVENTION	(KR101692436)_x000D_ 대한민국			(KR101692436)_x000D_ KOREA CENTER FOR DISEASE CONTROL AND PREVENTION		KR	ACADEMY	KR					GRANTED	GRANTED	ALIVE	ALIVE	(KR101692436)_x000D_ 2017-01-03	2036-05-13	C12Q-001/70/1	C12Q-001/70	1	2	2	0	1		Biotechnology		(KR101692436)_x000D_ An aspect of the present invention provides a primer set for diagnosing a Zika virus or a Japanese encephalitis virus, wherein the primer set includes an oligonucleotide of SEQ ID NO: 1 and an oligonucleotide of SEQ ID NO: 2; a method for diagnosing a Zika virus or a Japanese encephalitis virus, wherein the method includes performing RT-PCR by using the primer set; a kit for …				(KR101692436)_x000D_ Search Report references [Examiner]_x000D_ -Virology Journal 2013. Vol.10:311*_x000D_ -Journal of Clinical Virology 2008. Vol.43(1):96-101_x000D_ Applicant references_x000D_ -Faye et al., One-step RT-PCR for detection of Zika virus. 2008. J Clin.Virol 43:96-101_x000D_ -Balm et al., A Diagnostic polymerase chain reaction assay for Zika virus, 2012. J. Med. Virol. 84:1501-1505_…
75166344	A61K-009/00/19_x000D_ A61K-009/08_x000D_ A61K-039/12_x000D_ A61K-039/39_x000D_ A61K-039/42_x000D_ A61K-047/02_x000D_ A61K-047/18/3_x000D_ A61K-047/26_x000D_ A61K-047/42_x000D_ A61K-2039/5252_x000D_ A61K-2039/55505_x000D_ A61K-2039/55511_x000D_ A61K-2039/5555_x000D_ A61K-2039/55561_x000D_ A61K-2039/55566_x000D_ A61K-2039/55572_x000D_ A61K-2039/55583_x000D_ A61K-2039/58_x000D_ A61K-2039/70_x000D_ A…	A61K-009/00_x000D_ A61K-009/08_x000D_ A61K-039/00_x000D_ A61K-039/12_x000D_ A61K-039/39_x000D_ A61K-039/42_x000D_ A61K-047/02_x000D_ A61K-047/18_x000D_ A61K-047/26_x000D_ A61K-047/42_x000D_ A61P-031/12_x000D_ C07K-016/10_x000D_ C12N-007/00_x000D_ C12N-007/06_x000D_ G01N-033/569	Analysis of biological materials_x000D_ Pharmaceuticals	IN3652CH2015	2015IN-CH03652	2015-07-16	2015	(EP3322441)_x000D_ Vaccine compositions	SUMATHY KANDASWAMY_x000D_ ELLA KRISHNA MURTHY	(KR20180036987)_x000D_ 수마시칸다스와미_x000D_ 엘라크리쉬나멀시	(EP3322441)_x000D_ SUMATHY, Kandaswamy_x000D_ ELLA, Krishna Murthy	BHARAT BIOTECH INT_x000D_ BHARAT BIOTECH INTERNATIONAL	BHARAT BIOTECH INT_x000D_ BHARAT BIOTECH INTERNATIONAL	BHARAT BIOTECH INTERNATIONAL	(KR20180036987)_x000D_ 브하라트 바이오테크 인터내셔날 리미티드_x000D_ Reg. Nb: 520060213342	SUMATHY KANDASWAMY; FROM 2016-07-18 TO 2016-07-25_x000D_ ELLA KRISHNA MURTHY; FROM 2016-07-18 TO 2016-07-25_x000D_ BHARAT BIOTECH INTERNATIONAL; FROM 2016-07-25	(US20170014502)_x000D_ BHARAT BIOTECH INTERNATIONAL INDIA; EFFD=2016-07-25	(EP3322441)_x000D_ Bharat Biotech International Limited ([IN])_x000D_ (US20170014502)_x000D_ Bharat Biotech International Limited ([IN])_x000D_ (WO201709873)_x000D_ BHARAT BIOTECH INTERNATIONAL LIMITED ([IN])_x000D_ (CA2992531)_x000D_ BHARAT BIOTECH INTERNATIONAL LIMITED ([IN])_x000D_ SUMATHY, KANDASWAMY ([ZZ])_x000D_ ELLA, KRISHNA MURTHY ([ZZ])_x000D_ (IN2015CH03652)_x000D_ BHARAT BIOTECH INTERN…	(EP3322441)_x000D_ Bharat Biotech International Limited_x000D_ (US20170014502)_x000D_ Bharat Biotech International Limited_x000D_ (WO201709873)_x000D_ BHARAT BIOTECH INTERNATIONAL LIMITED_x000D_ (CA2992531)_x000D_ SUMATHY, KANDASWAMY; ELLA, KRISHNA MURTHY; BHARAT BIOTECH INTERNATIONAL LIMITED_x000D_ (IN2015CH03652)_x000D_ BHARAT BIOTECH INTERNATIONAL LIMITED_x000D_ (IN201847001322)_x000D_ BHARAT …	IN	CORPORATE	IN	(EP3322441)_x000D_ IN_x000D_ (US20170014502)_x000D_ IN_x000D_ (WO201709873)_x000D_ IN_x000D_ (CA2992531)_x000D_ ZZ; IN_x000D_ (IN2015CH03652)_x000D_ IN_x000D_ (IN201847001322)_x000D_ IN_x000D_ (VN--57521)_x000D_ IN	(EP3322441)_x000D_ NAME=Bharat Biotech International Limited Genome Valley Turkapally Shameerpet , CITY=Hyderabad 500 078 , COUNTRY=IN , REG=100729108 _x000D_ _x000D_ (US20170014502)_x000D_ NAME=Bharat Biotech International Limited , CITY=Hyderabad , COUNTRY=IN _x000D_ _x000D_ (WO201709873)_x000D_ NAME=BHARAT BIOTECH INTERNATIONAL LIMITED Genome Valley, Turkapally, Shameerpet, Hyderabad 500078 , …	(EP3322441)_x000D_ IN	(EP3322441)_x000D_ NAME=SUMATHY, Kandaswamy Bharat Biotech International Limited Genome Valley Turkapally Shameerpet , CITY=Hyderabad 500078 , COUNTRY=IN _x000D_ _x000D_ NAME=ELLA, Krishna Murthy Bharat Biotech International Limited Genome Valley Turkapally Shameerpet , CITY=Hyderabad 500078 , COUNTRY=IN _x000D_	PENDING	(EP3322441)_x000D_ PENDING_x000D_ (US20170014502)_x000D_ PENDING_x000D_ (WO201709873)_x000D_ PENDING_x000D_ (CA2992531)_x000D_ PENDING_x000D_ (IN3652/CHE/2015)_x000D_ PENDING_x000D_ (IN201847001322)_x000D_ PENDING_x000D_ (AU2016291836)_x000D_ PENDING_x000D_ (KR20180036987)_x000D_ PENDING_x000D_ (BR112018000862)_x000D_ PENDING_x000D_ (VN57521)_x000D_ PENDING_x000D_ (CO2018001534)_x000D_ PENDING_x0…	ALIVE	(EP3322441)_x000D_ ALIVE_x000D_ (US20170014502)_x000D_ ALIVE_x000D_ (WO201709873)_x000D_ ALIVE_x000D_ (CA2992531)_x000D_ ALIVE_x000D_ (IN3652/CHE/2015)_x000D_ ALIVE_x000D_ (IN201847001322)_x000D_ ALIVE_x000D_ (AU2016291836)_x000D_ ALIVE_x000D_ (KR20180036987)_x000D_ ALIVE_x000D_ (BR112018000862)_x000D_ ALIVE_x000D_ (VN57521)_x000D_ ALIVE_x000D_ (CO2018001534)_x000D_ ALIVE_x000D_ (PH12018500127)_x…		(EP3322441)_x000D_ 2036-07-15_x000D_ (US20170014502)_x000D_ 2036-07-18_x000D_ (WO201709873)_x000D_ 2019-01-16_x000D_ (CA2992531)_x000D_ 2036-07-15_x000D_ (IN3652/CHE/2015)_x000D_ 2035-07-16_x000D_ (IN201847001322)_x000D_ 2038-01-11_x000D_ (AU2016291836)_x000D_ 2036-07-15_x000D_ (KR20180036987)_x000D_ 2036-07-15_x000D_ (BR112018000862)_x000D_ 2036-07-15_x000D_ (VN57521)_x000D_ 2038-02-21_x000D_ (C…	A61K-039/12	A61K-039/12	11	12	3	32	12	(EP3322441)_x000D_ Contracting States: AL AT BE BG CH CY CZ DE DK EE ES FI FR GB GR HR HU IE IS IT LI LT LU LV MC MK MT NL NO PL PT RO RS SE SI SK SM TR_x000D_ Extension States: BA ME_x000D_ (WO201709873)_x000D_ National States: AE AG AL AM AO AT AU AZ BA BB BG BH BN BR BW BY BZ CA CH CL CN CO CR CU CZ DE DK DM DO DZ EC EE EG ES FI GB GD GE GH GM GT HN HR HU ID IL IN IR IS JP KE KG KN KP KR KZ LA…	Analysis of biological materials_x000D_ Pharmaceuticals	(US20170014502)_x000D_ VACCINE(100,89)_x000D_ ZIKA VIRUS ANTIGEN(100,32)_x000D_ VACCINE COMPOSITION STABILITY(100,3)_x000D_ VACCINE COMPOSITION PREPARATION(100,2)_x000D_ ZIKA VIRUS(75,97)_x000D_ ARBOVIRUS ANTIGEN(66,11)_x000D_ ZIKA VIRUS INACTIVATION(63,21)_x000D_ VIRAL HARVEST CLARIFICATION(53,4)_x000D_ HETEROLOGOUS VIRUS BACKBONE(47,9)_x000D_ RECOMBINANT BACMID EFFICIENT REGENERATION(44,1)_x000…	(EP3322441)_x000D_ The present disclosure provides vaccine compositions for prophylaxis and treatment of Zika virus infections comprising Zika virus antigens in immunogenic compositions, and in combination of Zika antigens with one or more arbovirus antigens such as Chikungunya virus and Japanese encephalitis virus antigens, methods of preparation and production of such compositions for use as va…	(US20170014502)_x000D_ Recombinant pFastBac vector containing one of the inserts SEQ ID NO: 1 or SEQ ID NO:2 cloned under the control of the polyhedron promoter is transformed into competent cells of E. coli Max Efficiency DH10Bac (Registered Trademark) , that contains a baculovirus shuttle vector (bMON14272) and a helper plasmid (pMON7124) that facilitates transposition to allow efficient re-gen…	(US20170014502)_x000D_ 1. A stable vaccine composition comprising one or more arbovirus antigens selected from Zika virus, Chikungunya virus and Japanese encephalitis virus, said antigens being formulated with or without an adjuvant in pharmaceutically acceptable buffer, wherein the vaccine composition elicits protective immune response to each of the viruses in mammals._x000D_ 53. A method for p…	(US20170014502)_x000D_ The present disclosure provides vaccine compositions for prophylaxis and treatment of Zika virus infections comprising Zika virus antigens in immunogenic compositions, and in combination of Zika antigens with one or more arbovirus antigens such as Chikungunya virus and Japanese encephalitis virus antigens, methods of preparation and production of such compositions for use a…	(US20170014502)_x000D_ Examiner references_x000D_ -Kuno G, et. al. Zika virus strain MR 766, complete genome. GenBank: AY632535.2. Dep. 05/21/2004, Updated 11/23/2010; hereafter "Kuno". (Cat. 102)
75212008	A61K-009/00/19_x000D_ A61K-009/51/23_x000D_ A61K-039/12_x000D_ A61K-2039/505_x000D_ A61K-2039/5252_x000D_ A61K-2039/53_x000D_ A61K-2039/543_x000D_ A61K-2039/6056_x000D_ C07K-014/005_x000D_ C07K-016/10/81_x000D_ C07K-016/28/51_x000D_ C07K-2317/33_x000D_ C07K-2317/76_x000D_ C12N-2770/24122_x000D_ C12N-2770/24123_x000D_ C12N-2770/24134_x000D_ C12N-2770/36122_x000D_ C12N-2770/36123_x000D_ C12N-2770/3…	A61K-031/7105_x000D_ A61K-039/12_x000D_ A61K-039/42_x000D_ A61P-031/14_x000D_ C07K-016/08_x000D_ C07K-016/10	Pharmaceuticals	US62/195,263P	2015US-62195263	2015-07-21	2015	(EP3324979)_x000D_ Infectious disease vaccines	CIARAMELLA GIUSEPPE_x000D_ HUANG ERIC YI-CHUN_x000D_ BAHL KAPIL_x000D_ ZAKS TAL_x000D_ HIMANSU SUNNY	(TW201718638)_x000D_ 夏拉米拉 吉賽普_x000D_ 黃 春藝_x000D_ 巴爾 卡皮爾_x000D_ 札克斯 泰爾_x000D_ 喜曼蘇 桑尼	(EP3324979)_x000D_ CIARAMELLA, Giuseppe_x000D_ HUANG, Eric Yi-Chun_x000D_ BAHL, Kapil_x000D_ ZAKS, Tal_x000D_ HIMANSU, Sunny	MODERNATX	MODERNATX	MODERNATX	(TW201718638)_x000D_ 現代治療公司			(EP3324979)_x000D_ ModernaTX, Inc. ([US])_x000D_ (WO201715463)_x000D_ MODERNATX, INC. ([US])_x000D_ (WO201715463)_x000D_ MODERNATX, INC. ([US])_x000D_ (TW201718638)_x000D_ MODERNATX, INC.	(EP3324979)_x000D_ ModernaTX, Inc._x000D_ (WO201715463)_x000D_ MODERNATX, INC._x000D_ (WO201715463)_x000D_ MODERNATX, INC.	EP	CORPORATE	US	(EP3324979)_x000D_ US_x000D_ (WO201715463)_x000D_ US_x000D_ (WO201715463)_x000D_ US	(EP3324979)_x000D_ NAME=ModernaTX, Inc. 320 Bent Street , CITY=Cambridge, MA 02141 , COUNTRY=US , REG=101636188 _x000D_ _x000D_ (WO201715463)_x000D_ NAME=MODERNATX, INC. 320 Bent Street Cambridge, MA 02141 , POSTCODE=02141 , COUNTRY=US _x000D_ _x000D_ (WO201715463)_x000D_ NAME=MODERNATX, INC. 320 Bent Street Cambridge, MA 02141 , POSTCODE=02141 , COUNTRY=US _x000D_	(EP3324979)_x000D_ US	(EP3324979)_x000D_ NAME=CIARAMELLA, Giuseppe 1 Hawes Road , CITY=Sudbury, MA 01776 , COUNTRY=US _x000D_ _x000D_ NAME=HUANG, Eric Yi-Chun 90 Wareham Street Apartment 302 , CITY=Boston, MA 02118 , COUNTRY=US _x000D_ _x000D_ NAME=BAHL, Kapil 4 Ellis Avenue , CITY=Medford, MA 02155 , COUNTRY=US _x000D_ _x000D_ NAME=ZAKS, Tal 122 Bellevue Street , CITY=Newton, MA 02458 , COUNTRY=US _x000D_ _x000D_ NAM…	PENDING	(EP3324979)_x000D_ PENDING_x000D_ (WO201715463)_x000D_ PENDING_x000D_ (TW201718638)_x000D_ PENDING	ALIVE	(EP3324979)_x000D_ ALIVE_x000D_ (WO201715463)_x000D_ ALIVE_x000D_ (TW201718638)_x000D_ ALIVE		(EP3324979)_x000D_ 2036-07-21_x000D_ (WO201715463)_x000D_ 2019-01-30_x000D_ (TW201718638)_x000D_ 2036-07-21	A61K-009/00/19	A61K-031/7105	3	6	7	0	3	(EP3324979)_x000D_ Contracting States: AL AT BE BG CH CY CZ DE DK EE ES FI FR GB GR HR HU IE IS IT LI LT LU LV MC MK MT NL NO PL PT RO RS SE SI SK SM TR_x000D_ Extension States: BA ME_x000D_ (WO201715463)_x000D_ National States: AE AG AL AM AO AT AU AZ BA BB BG BH BN BR BW BY BZ CA CH CL CN CO CR CU CZ DE DK DM DO DZ EC EE EG ES FI GB GD GE GH GM GT HN HR HU ID IL IN IR IS JP KE KG KN KP KR KZ LA…	Pharmaceuticals	(WO201715463)_x000D_ VACCINE(100,221)_x000D_ POLYPEPTIDE ANTIGEN ANTIBODY TITER(100,126)_x000D_ COMBINATION VACCINE(100,63)_x000D_ ZIKA VIRUS(100,14)_x000D_ DENGUE VIRUS(100,12)_x000D_ CHIKAGUNYA VIRUS(100,3)_x000D_ IMMUNOGENIC FRAGMENT(79,136)_x000D_ ANTIGENIC POLYPEPTIDE(67,260)_x000D_ DENV VACCINE(50,61)_x000D_ DENV ANTIGENIC POLYPEPTIDE(49,60)_x000D_ RECOMBINANT DENV PROTEIN VACCINE(41,12)_x0…	(EP3324979)_x000D_ Aspects of the disclosure relate to nucleic acid vaccines.The vaccines include one or more RNA polynucleotides having an open reading frame encoding one or more Chikungunya antigen(s), one or more Zika virus antigens, and one or more Dengue antigens.Methods for preparing and using such vaccines are also described.	(WO201715463)_x000D_ Thus, it is necessary to develop a vaccine that provides immunity to all four serotypes._x000D_ In humans, CHIKV causes a debilitating disease characterized by fever, headache, nausea, vomiting, fatigue, rash, muscle pain and joint pain._x000D_ This latter point is a major weakness with the_x000D_ Thus, CHIKV remains a public threat that constitutes a major public health prob…	(WO201715463)_x000D_ CLAIMS 1. A Zika virus (ZIKV) vaccine, comprising: at least one ribonucleic acid (RNA) polynucleotide having an open reading frame encoding at least one ZIKV antigenic polypeptide or an immunogenic fragment thereof._x000D_ 102. A Zika virus (ZIKV) vaccine, comprising at least one ribonucleic acid (RNA) polynucleotide having an open reading frame encoding at least one ZIKV ant…	(WO201715463)_x000D_ In some aspects, the present disclosure provides a vaccine or a combination vaccine of at least one RNA polynucleotide encoding at least one CHIKV antigenic polypeptide, at least one ZIKV antigenic polypeptide, at least one DENV antigenic polypeptide, or a combination of any two or three of the foregoing, and a pharmaceutically acceptable carrier or excipient._x000D_ It is re…	(WO201715463)_x000D_ International Search Report [Examiner]_x000D_ -RICHNER J. M. ET AL.: "Modified mRNA vaccines protect against Zika virus infection", CELL, vol. 168, March 2017 (2017-03-01), pages 1114 - 1125, XP029943352CC=XP; XP029943352 (Cat. P,X)_x000D_ -PARDI N. ET AL.: "Zika virus protection by a single low dose nucleoside modified mRNA vaccination", NATURE, vol. 543, no. 7644, March 201…
75212131	A01M-001/02_x000D_ A01M-001/10_x000D_ A01M-001/10/6_x000D_ A01M-001/20_x000D_ A01M-001/20/16_x000D_ A01N-027/00_x000D_ A01N-037/28_x000D_ A01N-037/40_x000D_ A01N-043/12_x000D_ A01N-043/16	A01M-001/02_x000D_ A01M-001/10_x000D_ A01M-001/20_x000D_ A01N-027/00_x000D_ A01N-037/40_x000D_ A61P-033/00	Basic materials chemistry_x000D_ Other special machines_x000D_ Pharmaceuticals	US62/195,681P	2015US-62195681	2015-07-22	2015	(US20180213776)_x000D_ Compositions for controlling mosquito populations	KAKANI EVDOXIA G_x000D_ CATTERUCCIA FLAMINIA_x000D_ GABRIELI PAOLO_x000D_ PATON DOUG	(CN108289443)_x000D_ E·G·卡卡尼_x000D_ F·卡泰鲁恰_x000D_ P·加布里埃利_x000D_ D·佩顿	(US20180213776)_x000D_ Kakani Evdoxia G._x000D_ Catteruccia Flaminia_x000D_ Gabrieli Paolo_x000D_ Paton Doug	HARVARD COLLEGE	HARVARD COLLEGE	HARVARD COLLEGE	(CN108289443)_x000D_ 哈佛大学校长及研究员协会	KAKANI EVDOXIA; FROM 2016-10-03 TO 2016-10-03_x000D_ GABRIELI PAOLO; FROM 2016-10-03 TO 2016-10-03_x000D_ PRESIDENT & FELLOWS OF HARVARD COLLEGE; FROM 2016-10-03_x000D_ CATTERUCCIA FLAMINIA; FROM 2016-10-06 TO 2016-10-06_x000D_ PATON DOUGLAS GRAEME; FROM 2016-10-11 TO 2016-10-11	(US20180213776)_x000D_ PRESIDENT & FELLOWS OF HARVARD COLLEGE MASSACHU; EFFD=2018-03-01	(US20180213776)_x000D_ PRESIDENT AND FELLOWS OF HARVARD COLLEGE ([US])_x000D_ (WO201715600)_x000D_ KAKANI, Evdoxia G._x000D_ CATTERUCCIA, Flaminia_x000D_ GABRIELI, Paolo_x000D_ PATON, Doug_x000D_ (CN108289443)_x000D_ PRESIDENT & FELLOWS OF HARVARD COLLEGE	(US20180213776)_x000D_ PRESIDENT AND FELLOWS OF HARVARD COLLEGE_x000D_ (WO201715600)_x000D_ KAKANI, Evdoxia G.; GABRIELI, Paolo; PATON, Doug; CATTERUCCIA, Flaminia	BR	Academy	US	(US20180213776)_x000D_ US_x000D_	(US20180213776)_x000D_ NAME=PRESIDENT AND FELLOWS OF HARVARD COLLEGE , CITY=Cambridge , STATE=MA , COUNTRY=US _x000D_ _x000D_ (WO201715600)_x000D_ NAME=KAKANI, Evdoxia G. 19 GARDEN STREET CAMBRIDGE, MASSACHUSETTS 02138 _x000D_ _x000D_ NAME=CATTERUCCIA, Flaminia 9 SHERIDAN STREET CAMBRIDGE, MASSACHUSETTS 02140 _x000D_ _x000D_ NAME=GABRIELI, Paolo VIA CASSINARI BRUNO 30 20138 MILAN _x000D_ _x000D_ …	(US20180213776)_x000D_ IT; US	(US20180213776)_x000D_ NAME=Kakani Evdoxia G. , CITY=Cambridge , STATE=MA , COUNTRY=US _x000D_ _x000D_ NAME=Catteruccia Flaminia , CITY=Cambridge , STATE=MA , COUNTRY=US _x000D_ _x000D_ NAME=Gabrieli Paolo , CITY=Milan , COUNTRY=IT _x000D_ _x000D_ NAME=Paton Doug , CITY=Somerville , STATE=MA , COUNTRY=US _x000D_	PENDING	(US20180213776)_x000D_ PENDING_x000D_ (WO201715600)_x000D_ PENDING_x000D_ (BR112018001251)_x000D_ PENDING_x000D_ (CN108289443)_x000D_ PENDING	ALIVE	(US20180213776)_x000D_ ALIVE_x000D_ (WO201715600)_x000D_ ALIVE_x000D_ (BR112018001251)_x000D_ ALIVE_x000D_ (CN108289443)_x000D_ ALIVE		(US20180213776)_x000D_ 2036-07-22_x000D_ (WO201715600)_x000D_ 2019-01-22_x000D_ (BR112018001251)_x000D_ 2036-07-22_x000D_ (CN108289443)_x000D_ 2036-07-22	A01N-037/40	A01N-037/40	4	0	2	0	4	(WO201715600)_x000D_ National States: AE AG AL AM AO AT AU AZ BA BB BG BH BN BR BW BY BZ CA CH CL CN CO CR CU CZ DE DK DM DO DZ EC EE EG ES FI GB GD GE GH GM GT HN HR HU ID IL IN IR IS JP KE KG KN KP KR KZ LA LC LK LR LS LU LY MA MD ME MG MK MN MW MX MY MZ NA NG NI NO NZ OM PA PE PG PH PL PT QA RO RS RU RW SA SC SD SE SG SK SL SM ST SV SY TH TJ TM TN TR TT TZ UA UG US UZ VC VN ZA ZM ZW_x000D_ ARI…	Basic materials chemistry_x000D_ Other special machines_x000D_ Pharmaceuticals	(US20180213776)_x000D_ CUTICULAR TARSAL UPTAKE ENHANCER(100,11)_x000D_ MOSQUITO POPULATION(100,8)_x000D_ MOSQUITO BORNE PATHOGEN TRANSMISSION(94,6)_x000D_ FEMALE MOSQUITO(91,38)_x000D_ ABOLISHING EGG DEVELOPMENT(84,4)_x000D_ MOSQUITO BORNE PATHOGEN DEVELOPMENT(73,2)_x000D_ MOSQUITO BITE(69,6)_x000D_ NONSTEROIDAL ECDYSONE AGONIST(61,28)_x000D_ OOCYST DEVELOPMENT(61,6)_x000D_ CYTOCHROME P450 INHIBI…	(US20180213776)_x000D_ Methods are disclosed herein for at least one of (i) substantially reducing Plasmodium and/or oocyst development, (ii) substantially reducing mating success, (iii) substantially abolishing egg development after blood feeding, (iv) substantially reducing the mean survival rate; (v) substantially reducing at least one of the transmission of mosquito borne pathogens; and (vi) …	(US20180213776)_x000D_ In some embodiments, the contacting causes the adult, female mosquitoes to not be able to support development of the mosquito borne pathogens._x000D_ major limitation_x000D_ [0004] Anopheles population densities are driven by the complex mosquito lifecycle involving multiple gonotrophic cycles in fertilized females, who lay hundreds of eggs following successive blood meals.…	(US20180213776)_x000D_ 1. A method for at least one of substantially reducing Plasmodium and/or oocyst development, substantially reducing mating success, substantially abolishing egg development after blood feeding, and substantially reducing the mean survival rate of adult, female mosquitoes, the method comprising: contacting the adult, female mosquitoes with a composition comprising an effecti…	(US20180213776)_x000D_ Methods are disclosed herein for at least one of (i) substantially reducing Plasmodium and/or oocyst development, (ii) substantially reducing mating success, (iii) substantially abolishing egg development after blood feeding, (iv) substantially reducing the mean survival rate; (v) substantially reducing at least one of the transmission of mosquito borne pathogens; and (vi) …
75277801		C12N-015/11_x000D_ C12Q-001/68_x000D_ C12Q-001/70	Biotechnology	CN201610781151	2016CN-0781151	2016-08-30	2016	(CN106367533)_x000D_ Nucleic acid for detecting Zika virus, real-time fluorescence RPA kit and method	YANG PENGFEI_x000D_ YAN QINGLI_x000D_ LI BINGBING_x000D_ XING YADONG_x000D_ LIU CHUNCHENG_x000D_ LI SHUANGSHU_x000D_ HU JINLIU_x000D_ YAO HAIBO_x000D_ HE NANJIANG	(CN106367533)_x000D_ 杨鹏飞_x000D_ 燕清丽_x000D_ 李兵兵_x000D_ 邢亚东_x000D_ 刘纯成_x000D_ 李双姝_x000D_ 胡锦流_x000D_ 姚海波_x000D_ 何南江	(CN106367533)_x000D_ YANG PENGFEI_x000D_ YAN QINGLI_x000D_ LI BINGBING_x000D_ XING YADONG_x000D_ LIU CHUNCHENG_x000D_ LI SHUANGSHU_x000D_ HU JINLIU_x000D_ YAO HAIBO_x000D_ HE NANJIANG	HUAIAN DISEASE PREVENTION CONTROL CENTER	HUAIAN DISEASE PREVENTION CONTROL CENTER	HUAIAN DISEASE PREVENTION CONTROL CENTER	(CN106367533)_x000D_ 淮安市疾病预防控制中心			(CN106367533)_x000D_ HUAIAN DISEASE PREVENTION CONTROL CENTER		CN	ACADEMY	CN					PENDING	PENDING	ALIVE	ALIVE		2036-08-30		C12Q-001/70	1	0	0	0	1		Biotechnology	(CN106367533)_x000D_ RECOMBINASE POLYMERASE AMPLIFICATION(100,27)_x000D_ PROBE(100,25)_x000D_ ZIKA VIRUS(100,25)_x000D_ REALTIME FLUORESCENCE(100,13)_x000D_ NUCLEIC ACID(100,12)_x000D_ KIT(100,11)_x000D_ ZIKA VIRUS DETECTION(100,7)_x000D_ DOWNSTREAM PRIMER(100,6)_x000D_ DIAGNOSIS(100,4)_x000D_ ISOTHERMAL AMPLIFICATION DETECTION(100,4)_x000D_ NEGATIVE CONTROL(100,3)_x000D_ NUCLEIC ACID ZIKA VIRUS(…	(CN106367533)_x000D_ The invention discloses nucleic acid for detecting Zika virus, a real-time fluorescence RPA kit and a detection method thereof.The real-time fluorescence RPA kit is convenient to use, the quantity of reagents adopted is small, the cost is low, the compatibility of required instruments is high, reaction can be performed on a real-time fluorescence PCR instrument and instrument…	(CN106367533)_x000D_ But because of the difficulties in designing primers and probes were larger, generally more difficult to achieve the desired effect of detection._x000D_ In addition, in the early phase of infection, IgM or IgG antibody titers were lower, it is difficult to confirm the diagnosis._x000D_ It is a common cross-reaction between the yellow virus, it is difficult to identify.	(CN106367533)_x000D_ 1. One set for isothermal amplification detection Zika virus nucleic acid, characterized in, includes an upper for Zika virus detection, the downstream primers and probes, wherein, as shown in SEQ ID No. 1 upstream sequences of the primers, the downstream primer sequence such as shown SEQ ID No. 2, as shown SEQ ID No. 3 sequence of the probe, wherein, 31st bit T of the probe …	(CN106367533)_x000D_ An object of the present invention is to provide a set of nucleic acids for use in isothermal amplification detection Zika virus._x000D_ The present invention is to provide a further object of the one used for the detection of the real-time fluorescence RPA Zika virus detection kit and method._x000D_ The present invention discloses a method for isothermal amplification of nuc…
75305453	A61K-031/485_x000D_ A61K-031/513_x000D_ A61K-031/57_x000D_ A61K-031/58_x000D_ A61K-031/7068_x000D_ A61K-045/06_x000D_ C07H-019/06_x000D_ C07H-019/067_x000D_ C07J-017/00_x000D_ C07J-041/00/05	A61K-031/485_x000D_ A61K-031/58_x000D_ A61K-031/7068_x000D_ A61K-031/7084_x000D_ A61K-045/06_x000D_ A61P-031/12_x000D_ C07D-407/14_x000D_ C07H-019/06_x000D_ C07H-019/067_x000D_ C07J-009/00_x000D_ C07J-017/00_x000D_ C07J-041/00	Pharmaceuticals	US62/282,525P	2015US-62282525	2015-08-03	2015	(US9855284)_x000D_ Pharmaceutical compositions and methods	ALTSCHUL RANDICE LISA_x000D_ THEISE NEIL DAVID_x000D_ KESEL ANDREAS J_x000D_ RAPKIN MYRON_x000D_ O'BRIEN REBECCA_x000D_ ARMENT ANTHONY R		(US20170128465)_x000D_ Altschul Randice Lisa_x000D_ Theise Neil David_x000D_ Kesel Andreas J._x000D_ Rapkin Myron_x000D_ O'Brien Rebecca_x000D_ Arment Anthony R._x000D_ (US9855284)_x000D_ Altschul Randice Lisa_x000D_ Theise Neil David_x000D_ Kesel Andreas J._x000D_ Rapkin Myron_x000D_ O'Brien Rebecca_x000D_ Arment Anthony R.	POP TEST ONCOLOGY	POP TEST ONCOLOGY	POP TEST ONCOLOGY		THEISE NEIL DAVID; FROM 2016-07-20 TO 2016-07-20_x000D_ ALTSCHUL RANDICE LISA; FROM 2016-07-20 TO 2016-07-20_x000D_ KESEL ANDREAS J; FROM 2016-07-20 TO 2016-07-20_x000D_ ARMENT ANTHONY R; FROM 2016-07-20 TO 2016-07-20_x000D_ RAPKIN MYRON; FROM 2016-07-20 TO 2016-07-20_x000D_ O BRIEN REBECCA; FROM 2016-07-20 TO 2016-07-20_x000D_ POP TEST ONCOLOGY; FROM 2016-07-20	(US9598459)_x000D_ POP TEST ONCOLOGY NEW JERSEY; EFFD=2016-07-20	(US20170051007)_x000D_ Pop Test Oncology Limited Liability Company ([US])_x000D_ (US9598459)_x000D_ Pop Test Oncology LLC ([US])_x000D_ (US20170128465)_x000D_ Pop Test Oncology LLC ([US])_x000D_ (US9855284)_x000D_ Pop Test Oncology LLC ([US])_x000D_ (US20180185392)_x000D_ Pop Test Oncology LLC ([US])_x000D_ (WO201723694)_x000D_ POP TEST ONCOLOGY LLC ([US])	(US20170051007)_x000D_ Pop Test Oncology Limited Liability Company_x000D_ (US9598459)_x000D_ Pop Test Oncology LLC_x000D_ (US20170128465)_x000D_ Pop Test Oncology LLC_x000D_ (US9855284)_x000D_ Pop Test Oncology LLC_x000D_ (US20180185392)_x000D_ Pop Test Oncology LLC_x000D_ (WO201723694)_x000D_ POP TEST ONCOLOGY LLC	US	CORPORATE	US	(US20170051007)_x000D_ US_x000D_ (US9598459)_x000D_ US_x000D_ (US20170128465)_x000D_ US_x000D_ (US9855284)_x000D_ US_x000D_ (US20180185392)_x000D_ US_x000D_ (WO201723694)_x000D_ US	(US20170051007)_x000D_ NAME=Pop Test Oncology Limited Liability Company , CITY=Cliffside Park , STATE=NJ , COUNTRY=US _x000D_ _x000D_ (US9598459)_x000D_ NAME=Pop Test Oncology LLC , CITY=Cliffside Park , STATE=NJ , COUNTRY=US , ATYP=US Company _x000D_ _x000D_ (US20170128465)_x000D_ NAME=Pop Test Oncology LLC , CITY=Cliffside Park , STATE=NJ , COUNTRY=US _x000D_ _x000D_ (US9855284)_x000D_ NAME=Pop…	(US20170128465)_x000D_ DE; US_x000D_ (US9855284)_x000D_ DE; US	(US20170128465)_x000D_ NAME=Altschul Randice Lisa , CITY=Cliffside Park , STATE=NJ , COUNTRY=US _x000D_ _x000D_ NAME=Theise Neil David , CITY=New York , STATE=NY , COUNTRY=US _x000D_ _x000D_ NAME=Kesel Andreas J. , CITY=Munich , COUNTRY=DE _x000D_ _x000D_ NAME=Rapkin Myron , CITY=Indianapolis , STATE=IN , COUNTRY=US _x000D_ _x000D_ NAME=O'Brien Rebecca , CITY=Shell Knob , STATE=MO , COUNTRY=US _x…	GRANTED	(US20170051007)_x000D_ GRANTED_x000D_ (US20170128465)_x000D_ GRANTED_x000D_ (US20180185392)_x000D_ PENDING_x000D_ (WO201723694)_x000D_ PENDING	ALIVE	(US20170051007)_x000D_ ALIVE_x000D_ (US20170128465)_x000D_ ALIVE_x000D_ (US20180185392)_x000D_ ALIVE_x000D_ (WO201723694)_x000D_ ALIVE	(US9598459)_x000D_ 2017-03-21_x000D_ (US9855284)_x000D_ 2018-01-02	(US20170051007)_x000D_ 2036-07-28_x000D_ (US20170128465)_x000D_ 2036-07-28_x000D_ (US20180185392)_x000D_ 2036-07-28_x000D_ (WO201723694)_x000D_ 2019-02-03	A61K-031/58	A61K-031/58	2	0	2	17	4	(WO201723694)_x000D_ National States: AE AG AL AM AO AT AU AZ BA BB BG BH BN BR BW BY BZ CA CH CL CN CO CR CU CZ DE DK DM DO DZ EC EE EG ES FI GB GD GE GH GM GT HN HR HU ID IL IN IR IS JP KE KG KN KP KR KZ LA LC LK LR LS LU LY MA MD ME MG MK MN MW MX MY MZ NA NG NI NO NZ OM PA PE PG PH PL PT QA RO RS RU RW SA SC SD SE SG SK SL SM ST SV SY TH TJ TM TN TR TT TZ UA UG US UZ VC VN ZA ZM ZW_x000D_ ARI…	Pharmaceuticals	(US20170051007)_x000D_ CORTISOL BLOCKER(99,2)_x000D_ SUPPRESSIVE ANTIVIRAL REGIMEN(99,1)_x000D_ SEQUESTERED CELLULAR COMPARTMENT(75,1)_x000D_ RESISTANT PROSTATE CANCER(69,4)_x000D_ DNA PROVIRAL GENOME(64,1)_x000D_ VIRAL DNA TRANSCRIPT(47,1)_x000D_ CORTISOL SECRETION(42,10)_x000D_ ANTAGONIST(40,49)_x000D_ ATTRACTIVE TARGET(39,1)_x000D_ ROSS RIVER VIRUS(37,14)_x000D_ EXCIPIENT(37,5)_x000D_ VIRAL ER…	(US9855284)_x000D_ This invention relates the use of cortisol blockers (e.g., glucocorticoid receptor [GR] antagonists) for the treating or preventing viral infections, treating or preventing treatment resistant prostate cancer, treating or preventing neoplasia, and treating or preventing infection related to acute or chronic injury or disease.	(US20170051007)_x000D_ HIV integrase is an attractive target for the discovery of new therapeutics due to its important role in viral infections, particularly HIV infections._x000D_ [0013] Moreover, these viruses contain viral DNA transcripts that are pro-viruses that enable viruses to remain latent in sequestered cellular compartments in the body; these DNA pro-viral genomes are responsible for …	(US20170051007)_x000D_ 1. A compound selected from the group consisting of: PT155: or pharmaceutically acceptable salts thereof; PT156: or pharmaceutically acceptable salts thereof; PT157: or pharmaceutically acceptable salts thereof; PT158: or pharmaceutically acceptable salts thereof; TCY1: or pharmaceutically acceptable salts thereof; and, combinations thereof._x000D_ 2. A pharmaceutical compo…	(US20170051007)_x000D_ This invention relates the use of cortisol blockers (e.g., glucocorticoid receptor [GR] antagonists) for the treating or preventing viral infections, treating or preventing treatment resistant prostate cancer, treating or preventing neoplasia, and treating or preventing infection related to acute or chronic injury or disease._x000D_ [0002] This invention relates the use of …	(US9855284)_x000D_ Applicant references_x000D_ -Tustin, CA et al, Peregrine's Bavituximab Demonstrates Potential in Viral Hemorrhagic Fever Infection Models/Synergistic Therapeutic Effects Observed When Combining Bavituximab with Ribavirin; Data Presented at the 2010 Chemical and Biological Defense Science, http://www.finanznachrichten.de, from Marketwired, Nov. 17, 2010._x000D_ -Kesel, AJ et al,…
75361122	A01M-001/02_x000D_ G01N-033/569_x000D_ G01N-033/569/83_x000D_ G01N-033/577_x000D_ G01N-033/58/5_x000D_ G01N-2333/185_x000D_ G01N-2333/43591_x000D_ Y02A-050/51_x000D_ Y02A-050/53_x000D_ Y02A-050/55_x000D_ Y02A-050/57_x000D_ Y02A-050/58	A01M-001/02_x000D_ G01N-001/10_x000D_ G01N-033/569_x000D_ G01N-033/577_x000D_ G01N-033/58	Analysis of biological materials_x000D_ Other special machines	US62/203,626P	2015US-62203626	2015-08-11	2015	(US20180231550)_x000D_ Passive insect surveillance sensor device	WILLENBERG BRADLEY J_x000D_ SEAL SUDIPTA		(US20180231550)_x000D_ WILLENBERG Bradley J._x000D_ SEAL Sudipta	UNIVERSITY OF CENTRAL FLORIDA RESEARCH FOUNDATION	UNIVERSITY OF CENTRAL FLORIDA RESEARCH FOUNDATION	UNIVERSITY OF CENTRAL FLORIDA RESEARCH FOUNDATION				(US20180231550)_x000D_ UNIVERSITY OF CENTRAL FLORIDA RESEARCH FOUNDATION, INC. ([US])_x000D_ (WO201727677)_x000D_ UNIVERSITY OF CENTRAL FLORIDA RESEARCH FOUNDATION, INC. ([US])	(US20180231550)_x000D_ UNIVERSITY OF CENTRAL FLORIDA RESEARCH FOUNDATION, INC._x000D_ (WO201727677)_x000D_ UNIVERSITY OF CENTRAL FLORIDA RESEARCH FOUNDATION, INC.	US	ACADEMY	US	(US20180231550)_x000D_ US_x000D_ (WO201727677)_x000D_ US	(US20180231550)_x000D_ NAME=UNIVERSITY OF CENTRAL FLORIDA RESEARCH FOUNDATION, INC. , CITY=Orlando , STATE=FL , COUNTRY=US _x000D_ _x000D_ (WO201727677)_x000D_ NAME=UNIVERSITY OF CENTRAL FLORIDA RESEARCH FOUNDATION, INC. 12201 Research Parkway Suite 501 Orlando, Florida 32826 , POSTCODE=32826 , COUNTRY=US _x000D_	(US20180231550)_x000D_ US	(US20180231550)_x000D_ NAME=WILLENBERG Bradley J. , CITY=Orlando , STATE=FL , COUNTRY=US _x000D_ _x000D_ NAME=SEAL Sudipta , CITY=Oviedo , STATE=FL , COUNTRY=US _x000D_	PENDING	(US20180231550)_x000D_ PENDING_x000D_ (WO201727677)_x000D_ PENDING	ALIVE	(US20180231550)_x000D_ ALIVE_x000D_ (WO201727677)_x000D_ ALIVE		(US20180231550)_x000D_ 2036-08-11_x000D_ (WO201727677)_x000D_ 2019-02-11	G01N-033/569/83	G01N-033/569	2	0	6	0	2	(WO201727677)_x000D_ National States: AE AG AL AM AO AT AU AZ BA BB BG BH BN BR BW BY BZ CA CH CL CN CO CR CU CZ DE DK DM DO DZ EC EE EG ES FI GB GD GE GH GM GT HN HR HU ID IL IN IR IS JP KE KG KN KP KR KZ LA LC LK LR LS LU LY MA MD ME MG MK MN MW MX MY MZ NA NG NI NO NZ OM PA PE PG PH PL PT QA RO RS RU RW SA SC SD SE SG SK SL SM ST SV SY TH TJ TM TN TR TT TZ UA UG US UZ VC VN ZA ZM ZW_x000D_ ARI…	Analysis of biological materials_x000D_ Other special machines	(US20180231550)_x000D_ SURVEILLANCE SENSOR(100,4)_x000D_ PASSIVE INSECT(100,1)_x000D_ INSECT ATTRACTANT(98,22)_x000D_ COLORIMETRIC READOUT(89,2)_x000D_ DEPLOYED PAYLOAD RESERVOIR(85,1)_x000D_ INSECT SALIVA(75,13)_x000D_ GOLD NANOPARTICLE(74,31)_x000D_ DETECTOR MOLECULE(73,37)_x000D_ MOSQUITO BORNE DISEASE(72,3)_x000D_ PAYLOAD RESERVOIR(65,26)_x000D_ MOSQUITO(63,53)_x000D_ DETECTOR CONJUGATE(62,24…	(US20180231550)_x000D_ Disclosed are real-time insect surveillance sensor devices and methods that use a colorimetric readout for detecting insect disease vectors (such as mosquitoes which can transmit pathogens such as DENV, CHIKV, and ZIKV).The method involves an attractive or feeding solution combined with detector conjugates.The conjugate can specifically detect proteins present in insect sal…	(US20180231550)_x000D_ Therefore, there is a need in the art for a strategy to combat this problem._x000D_ The optional cover is particularly useful when the insect population is sparse._x000D_ [0093] The secondary reservoir optionally contains and isolates the contents of the deployed payload reservoir from contact with the wick, however, once released, the payload contents can make contact with…	(US20180231550)_x000D_ 1. A device comprising: (a) a payload reservoir comprising an insect attractant or insect food source; and (b) a detector conjugate comprising a gold nanoparticle conjugated to a specific detector molecule that binds specifically to a protein present in the saliva of a specific insect to be detected._x000D_ 10. A device comprising: (a) a payload reservoir comprising an inse…	(US20180231550)_x000D_ [0071] In another aspect, disclosed herein is a device comprising:_x000D_ Also disclosed are methods for field surveillance of insects and pathogens (for example, mosquitoes and mosquito-borne diseases)._x000D_ Also provided is a method for field surveillance of insects and pathogens (e.g. mosquitoes and mosquito-borne diseases).	(WO201727677)_x000D_ International Search Report [Examiner]_x000D_ -XIA, F ET AL.: "Colorimetric detection of DNA, small molecules, proteins, and ions using 2 unmodified gold nanoparticles and conjugated polyelectrolytes.", PROCEEDINGS OF THE NATIONAL 3 ACADEMY OF SCIENCES., vol. 107, no. 24, 15 June 2010 (2010-06-15), pages 10838, XP055141430CC=XP; XP055141430 (Cat. Y)_x000D_ -DEKA, J ET AL.: "S…
75361262	A01M-003/00_x000D_ A01N-025/34_x000D_ B64C-039/02/4_x000D_ B64C-2201/027_x000D_ B64C-2201/127_x000D_ B64C-2201/128_x000D_ B64C-2201/145_x000D_ B64C-2201/146_x000D_ B64D-001/18	A01M-013/00_x000D_ A01M-029/12_x000D_ A01N-025/34	Basic materials chemistry_x000D_ Other special machines	US62/204,113P	2015US-62204113	2015-08-12	2015	(WO201727836)_x000D_ Devices and methods for pest control	ALBANNA ROWENA LAMPA_x000D_ FRANDSEN GREY_x000D_ MATSUURA BELINKO K_x000D_ MATSUURA DAVID G_x000D_ LOOS JEFFREY J		(WO201727836)_x000D_ ALBANNA, Rowena Lampa_x000D_ FRANDSEN, Grey_x000D_ MATSUURA, Belinko K._x000D_ MATSUURA, David G._x000D_ LOOS, Jeffrey J.	OLFACTOR LABORATORIES	OLFACTOR LABORATORIES	OLFACTOR LABORATORIES				(WO201727836)_x000D_ OLFACTOR LABORATORIES, INC. ([US])_x000D_ (CA2995465)_x000D_ OLFACTOR LABORATORIES, INC. ([US])_x000D_ ALBANNA, ROWENA LAMPA ([ZZ])_x000D_ FRANDSEN, GREY ([ZZ])_x000D_ MATSUURA, BELINKO K. ([ZZ])_x000D_ MATSUURA, DAVID G. ([ZZ])_x000D_ LOOS, JEFFREY J. ([ZZ])	(WO201727836)_x000D_ OLFACTOR LABORATORIES, INC._x000D_ (CA2995465)_x000D_ LOOS, JEFFREY J.; OLFACTOR LABORATORIES, INC.; FRANDSEN, GREY; MATSUURA, BELINKO K.; MATSUURA, DAVID G.; ALBANNA, ROWENA LAMPA	CA	CORPORATE	US	(WO201727836)_x000D_ US_x000D_ (CA2995465)_x000D_ ZZ; US	(WO201727836)_x000D_ NAME=OLFACTOR LABORATORIES, INC. 1650 Spruce Street, 5th Floor Riverside, California 92507 , POSTCODE=92507 , COUNTRY=US _x000D_ _x000D_ (CA2995465)_x000D_ NAME=OLFACTOR LABORATORIES, INC. 1650 SPRUCE STREET 5TH FLOOR , CITY=RIVERSIDE , STATE=CA , POSTCODE=92507 , COUNTRY=US _x000D_ _x000D_ NAME=OLFACTOR LABORATORIES, INC. 1650 SPRUCE STREET 5TH FLOOR , CITY=RIVERSIDE , STATE…	(WO201727836)_x000D_ US	(WO201727836)_x000D_ NAME=ALBANNA, Rowena Lampa 1650 Spruce St., 5th Floor Riverside, California 92507 , POSTCODE=92507 , COUNTRY=US _x000D_ _x000D_ NAME=FRANDSEN, Grey 3594 Beechwood Place Riverside, California 92506 , POSTCODE=92506 , COUNTRY=US _x000D_ _x000D_ NAME=MATSUURA, Belinko K. 531 Stevens Ave. West Suite A Solana Beach, California 92075 , POSTCODE=92075 , COUNTRY=US _x000D_ _x000D_ NA…	PENDING	(WO201727836)_x000D_ PENDING_x000D_ (CA2995465)_x000D_ PENDING	ALIVE	(WO201727836)_x000D_ ALIVE_x000D_ (CA2995465)_x000D_ ALIVE		(WO201727836)_x000D_ 2019-02-12_x000D_ (CA2995465)_x000D_ 2036-08-12	A01N-025/34	A01M-013/00	2	1	2	0	2	(WO201727836)_x000D_ National States: AE AG AL AM AO AT AU AZ BA BB BG BH BN BR BW BY BZ CA CH CL CN CO CR CU CZ DE DK DM DO DZ EC EE EG ES FI GB GD GE GH GM GT HN HR HU ID IL IN IR IS JP KE KG KN KP KR KZ LA LC LK LR LS LU LY MA MD ME MG MK MN MW MX MY MZ NA NG NI NO NZ OM PA PE PG PH PL PT QA RO RS RU RW SA SC SD SE SG SK SL SM ST SV SY TH TJ TM TN TR TT TZ UA UG US UZ VC VN ZA ZM ZW_x000D_ ARI…	Basic materials chemistry_x000D_ Other special machines	(WO201727836)_x000D_ DELIVERY UNIT(100,172)_x000D_ TARGET AREA(100,98)_x000D_ PEST CONTROL COMPOUND(100,87)_x000D_ DELIVERY STRUCTURE(100,48)_x000D_ KIT(100,30)_x000D_ AERIAL DELIVERY(100,7)_x000D_ AERIAL DELIVERY VEHICLE(99,126)_x000D_ PAYLOAD(37,72)_x000D_ COMMERCIAL REPELLENT(31,7)_x000D_ PAYLOAD AERIAL DELIVERY(29,11)_x000D_ CARGO HOLDER(28,22)_x000D_ LEMON EUCALYPTUS(28,11)_x000D_ BUOYANCY P…	(WO201727836)_x000D_ The present invention provides devices and methods for payload delivery, including payloads for pest control (e.g., biocidal and larvicidal compounds and compositions).Also included are devices and methods for delivering payloads to remote areas by aerial delivery.	(WO201727836)_x000D_ In some cases, synergists may be used to make the overall odor of a composition more acceptable to one or more subjects exposed to such compositions while enhancing efficacy._x000D_ This is useful in the identification of compounds and compositions that only activate or inhibit cpB and cpC neurons or compounds and compositions that activate or inhibit both._x000D_ Malaria is …	(WO201727836)_x000D_ CLAIMS 1. A delivery structure for aerial delivery of a pest control compound or composition to a target area, the device comprising: a. an attachment section for attaching the delivery structure to an aerial delivery vehicle; and b. one or more delivery units adapted for containing the pest control compound or composition and adapted for releasing the pest control compound o…	(WO201727836)_x000D_ [0002] The present invention relates to the field of pest control as well as methods of delivering compounds and compositions for pest control purposes to bodies of water, including remote bodies of water._x000D_ [0007] The present invention provides delivery structures for aerial delivery of pest control compounds or compositions to target areas._x000D_ [0014] In some embodi…
75419375	A61K-038/55_x000D_ C12N-009/50/6_x000D_ C12N-015/70_x000D_ C12Q-001/37_x000D_ G01N-2333/9513_x000D_ Y02A-050/391	A61K-038/55_x000D_ A61P-031/14_x000D_ C12N-009/50_x000D_ C12N-015/70_x000D_ C12Q-001/37	Pharmaceuticals	CN201610883192	2016CN-0883192	2016-10-10	2016	(CN106399456)_x000D_ Purpose of aprotinin and determination method of Zika virus non-structure protease activity	YANG HAITAO_x000D_ HU CAN_x000D_ TAN YUSHENG_x000D_ CHEN XIA_x000D_ CAI YAN	(CN106399456)_x000D_ 杨海涛_x000D_ 胡灿_x000D_ 谭宇声_x000D_ 陈侠_x000D_ 蔡岩	(CN106399456)_x000D_ YANG HAITAO_x000D_ HU CAN_x000D_ TAN YUSHENG_x000D_ CHEN XIA_x000D_ CAI YAN	TIANJIN INTERNATIONAL JOINT ACADEMY OF BIOMEDICINE	TIANJIN INTERNATIONAL JOINT ACADEMY OF BIOMEDICINE	TIANJIN INTERNATIONAL JOINT ACADEMY OF BIOMEDICINE	(CN106399456)_x000D_ 天津国际生物医药联合研究院			(CN106399456)_x000D_ TIANJIN INTERNATIONAL JOINT ACADEMY OF BIOMEDICINE		CN	ACADEMY	CN					PENDING	PENDING	ALIVE	ALIVE		2036-10-10	Y02A-050/391	C12Q-001/37	1	1	0	0	1		Pharmaceuticals	(CN106399456)_x000D_ ZIKA VIRUS(100,41)_x000D_ MEASURING PROTEASE ACTIVITY(100,9)_x000D_ APROTININ APROT ZIKA VIRUS(100,1)_x000D_ PROTEASE ACTIVITY INHIBITOR(100,1)_x000D_ PROTEASE ACTIVITY MEASUREMENT(100,1)_x000D_ ZIKA VIRUS APROT(100,1)_x000D_ ZIKA VIRUS PROTEASE MOIETY(98,1)_x000D_ ZIKA VIRUS PROTEASE GENE(96,7)_x000D_ APROT ZIKA VIRUS PROTEASE(96,1)_x000D_ ZIKA VIRUS PROTEASE ACTIVITY(92,2)_…	(CN106399456)_x000D_ The invention discloses a purpose of aprotinin as a Zika virus non-structure protease activity inhibiting agent, and also discloses a determination method of the Zika virus non-structure protease activity.In the determination process, Aprotinin is used as the activity inhibiting agent of the Zika virus non-structure protease; the determination method proves that the aprotinin…	(CN106399456)_x000D_ The present invention is to provide a technical problem to be solved by the use of a non-Zika virus protease structure Aprot measure the activity of method as well.	(CN106399456)_x000D_ 1. One Aprot for Zika virus protease activity inhibitor use of non-structure._x000D_ 3. One method of measuring protease activity Zika virus non-structure, comprising the steps of: A, Zika virus protease gene will contain a whole gene synthesis of the vector of transformed into E. coli DH5 competent cells pMV, grown overnight on LB plates coated on, containing 100 mg/L ampici…	(CN106399456)_x000D_ The present invention discloses a Aprot for an inhibitor of the protease activity Zika virus non-structure._x000D_ The present invention also discloses a method of measuring protease activity Zika virus nonstructural, during measurement, Aprotinin Aprot Zika virus is selected as the non-structure in the protease NS2B-NS3 inhibitor of the activity, the assay method is demonstr…
75503958	C12Q-001/37	C12Q-001/37	Biotechnology	CN201610875701	2016CN-0875701	2016-10-08	2016	(CN106434849)_x000D_ Activity determination buffer solution and activity determination method of high-throughput Zika virus non-structural protease	YANG HAITAO_x000D_ HU CAN_x000D_ CHEN CHENG_x000D_ WANG ZEFANG_x000D_ CAI YAN	(CN106434849)_x000D_ 杨海涛_x000D_ 胡灿_x000D_ 陈成_x000D_ 王泽方_x000D_ 蔡岩	(CN106434849)_x000D_ YANG HAITAO_x000D_ HU CAN_x000D_ CHEN CHENG_x000D_ WANG ZEFANG_x000D_ CAI YAN	TIANJIN INTERNATIONAL JOINT ACADEMY OF BIOMEDICINE	TIANJIN INTERNATIONAL JOINT ACADEMY OF BIOMEDICINE	TIANJIN INTERNATIONAL JOINT ACADEMY OF BIOMEDICINE	(CN106434849)_x000D_ 天津国际生物医药联合研究院			(CN106434849)_x000D_ TIANJIN INTERNATIONAL JOINT ACADEMY OF BIOMEDICINE		CN	ACADEMY	CN					PENDING	PENDING	ALIVE	ALIVE		2036-10-08	C12Q-001/37	C12Q-001/37	1	0	0	0	1		Biotechnology	(CN106434849)_x000D_ PROTEASE ASSAY(100,15)_x000D_ ZIKA VIRUS ACTIVITY(100,13)_x000D_ ACTIVITY ASSAY(100,1)_x000D_ THROUGHPUT ZIKA VIRUS(100,1)_x000D_ ZIKA VIRUS(88,25)_x000D_ PROTEASE ASSAY ACTIVITY(79,2)_x000D_ ZIKA VIRUS DETECTION ACTIVITY(73,1)_x000D_ ASSAYING PROTEASE(71,1)_x000D_ PROTEASE ACTIVITY INHIBITOR SCREENING(69,2)_x000D_ FLUOROMETER FLUORASKAN ASCENT(63,5)_x000D_ ZIKA VIRUS PROTEAS…	(CN106434849)_x000D_ The invention discloses an activity determination buffer solution and an activity determination method of high-throughput Zika virus non-structural protease, wherein the buffer solution consists of the following buffer ingredients: 10-200mM of trihydroxymethyl aminomethane, 0-20mM of sodium chloride, 0-1mM of CHAPS, 0-20mM of galactose and glycerol which is 10-40% of in volum…	(CN106434849)_x000D_ The present invention to solve the technical problems of the known art by the technical scheme is:	(CN106434849)_x000D_ 1. A high throughput Zika virus non-activity of a protease assay buffer structure, characterized in: buffer of a buffer component comprising: Tris 10-100 mm, sodium chloride 0-20 mm, CHAPS 0-1 mm, galactose 0-20 mm, a volume ratio of glycerin 10-40% of; buffer has a PH value of 8.0-9.0.	(CN106434849)_x000D_ A high flux activity of a protease assay buffer and a non-Zika virus activity measurement method structure, wherein the buffer of the buffer component comprises: Tris 10-200 mm, sodium chloride 0-20 mm, CHAPS 0-1 mm, galactose 0-20 mm, the volume fraction of 10-40% of glycerol; 8.0-9.0 PH value of the buffer._x000D_ The present invention buffers can be improved during enzymat…
75578062	C12Q-001/68/09_x000D_ C12Q-001/68/16_x000D_ C12Q-001/70/1_x000D_ Y02A-050/51_x000D_ Y02A-050/53_x000D_ Y02A-050/54_x000D_ Y02A-050/60	C12Q-001/68_x000D_ C40B-030/04	Biotechnology	US62/211,541P	2015US-62211541	2015-08-28	2015	(WO201740316)_x000D_ Sample analysis, presence determination of a target sequence	SABETI PARDIS_x000D_ METSKY HAYDEN_x000D_ GNIRKE ANDREAS_x000D_ MATRANGA CHRISTIAN_x000D_ PARK DANIEL		(WO201740316)_x000D_ METSKY, Hayden_x000D_ GNIRKE, Andreas_x000D_ SABETI, Pardis_x000D_ MATRANGA, Christian_x000D_ PARK, Daniel	BROAD INSTITUTE_x000D_ MIT - MASSACHUSETTS INSTITUTE OF TECHNOLOGY	BROAD INSTITUTE_x000D_ MIT - MASSACHUSETTS INSTITUTE OF TECHNOLOGY	BROAD INSTITUTE_x000D_ MIT - MASSACHUSETTS INSTITUTE OF TECHNOLOGY				(WO201740316)_x000D_ THE BROAD INSTITUTE, INC. ([US])_x000D_ MASSACHUSETTS INSTITUTE OF TECHNOLOGY ([US])	(WO201740316)_x000D_ THE BROAD INSTITUTE, INC.; MASSACHUSETTS INSTITUTE OF TECHNOLOGY	US	ACADEMY;ACADEMY	US	(WO201740316)_x000D_ US	(WO201740316)_x000D_ NAME=THE BROAD INSTITUTE, INC. 415 Main Street Cambridge, MA 02142 , POSTCODE=02142 , COUNTRY=US _x000D_ _x000D_ NAME=MASSACHUSETTS INSTITUTE OF TECHNOLOGY 77 Massachusetts Avenue Cambridge, MA 02139 , POSTCODE=02139 , COUNTRY=US _x000D_	(WO201740316)_x000D_ US	(WO201740316)_x000D_ NAME=METSKY, Hayden 534 Beacon St., Apt. 902 Boston, MA 02215 , POSTCODE=02215 , COUNTRY=US _x000D_ _x000D_ NAME=GNIRKE, Andreas 89 Overbrook Drive Wellesley, MA 02482 , POSTCODE=02482 , COUNTRY=US _x000D_ _x000D_ NAME=SABETI, Pardis 416 Commonwealth Avenue, Apt. #619 Boston, MA 02215 , POSTCODE=02215 , COUNTRY=US _x000D_ _x000D_ NAME=MATRANGA, Christian 86 Harvard Road Stow,…	PENDING	PENDING	ALIVE	ALIVE		2019-02-28	C12Q-001/70/1	C40B-030/04	1	0	0	0	1	(WO201740316)_x000D_ National States: AE AG AL AM AO AT AU AZ BA BB BG BH BN BR BW BY BZ CA CH CL CN CO CR CU CZ DE DK DM DO DZ EC EE EG ES FI GB GD GE GH GM GT HN HR HU ID IL IN IR IS JP KE KG KN KP KR KZ LA LC LK LR LS LU LY MA MD ME MG MK MN MW MX MY MZ NA NG NI NO NZ OM PA PE PG PH PL PT QA RO RS RU RW SA SC SD SE SG SK SL SM ST SV SY TH TJ TM TN TR TT TZ UA UG US UZ VC VN ZA ZM ZW_x000D_ ARI…	Biotechnology	(WO201740316)_x000D_ PROBE GENERATION(100,8)_x000D_ CONSTRUCTING CANDIDATE(100,5)_x000D_ MONTANA MYOTIS LEUKOENCHALITIS VIRUS(98,2)_x000D_ PROBE(74,154)_x000D_ TARGET SEQUENCE(72,67)_x000D_ TORQUE TENO DOUROUCOULI VIRUS(72,2)_x000D_ NONSPECIFIC SYMPTOM(72,1)_x000D_ TORQUE TENO ZALOPHUS VIRUS(70,2)_x000D_ TORQUE TENO TAMARIN VIRUS(69,2)_x000D_ PATHOGEN BROAD SPECTRUM(68,1)_x000D_ HYBRIDIZATION PAT…	(WO201740316)_x000D_ The present invention provides a combination of genomic and computational technologies to provide rapid, portable sample analysis for sequencing or identifying a target sequence involving generating probes for use in analyzing a sample which may comprise a target sequence.	(WO201740316)_x000D_ [0007] One method for overcoming the scarcity of target sequences is hybrid selection that makes it possible to capture target sequences out of the biological mixtures._x000D_ [0012] First, there is a need in patient care for more comprehensive diagnostic tests._x000D_ [0013] Second, there is a need to better understand the array of existing pathogens and to detect emerging t…	(WO201740316)_x000D_ 1. A method for generating probes for use in analyzing a sample comprising a target sequence, comprising: a. constructing candidate probes capable of hybridizing a reference sequence, said candidate probes collectively having a hybridization pattern along the length of the reference sequence; b. determining an individual hybridization pattern for each candidate probe to provi…	(WO201740316)_x000D_ [0004] The present invention provides a combination of genomic and computational technologies to provide rapid, portable sample analysis for sequencing or identifying a target sequence._x000D_ [0015] According to one aspect of the invention, a method for generating probes for use in analyzing a sample is provided and comprises a target sequence, which may comprise: a. constru…	(WO201740316)_x000D_ International Search Report [Examiner]_x000D_ -JABADO ET AL.: "Comprehensive viral oligonucleotide probe design using conserved protein regions", NUCLEIC ACIDS RESEARCH, vol. 36, no. 1, 2008, pages 1 - 10, XP055366340CC=XP; XP055366340 (Cat. Y)_x000D_ -TAGHIPOUR ET AL.: "Applying surface-based DNA computing for solving the dominating set problem", AMERICAN JOURNAL OF MOLECULA…
75578089	A61K-031/13_x000D_ A61K-031/19_x000D_ A61K-031/196_x000D_ A61K-031/215_x000D_ A61K-031/351_x000D_ A61K-031/7012_x000D_ A61K-036/185_x000D_ A61K-036/35_x000D_ A61K-045/06_x000D_ A61P-031/14_x000D_ A61P-031/16_x000D_ Y02A-050/385_x000D_ Y02A-050/391	A61K-031/13_x000D_ A61K-031/19_x000D_ A61K-031/215_x000D_ A61K-031/351_x000D_ A61K-031/352_x000D_ A61K-031/7034_x000D_ A61K-036/185_x000D_ A61K-036/60_x000D_ A61K-131/00_x000D_ A61P-031/12_x000D_ A61P-031/14_x000D_ A61P-031/16_x000D_ A61P-031/22_x000D_ C07K-016/08_x000D_ C07K-016/14	Pharmaceuticals	US62/212,339P	2015US-62212339	2015-08-31	2015	(EP3344272)_x000D_ Composition for treating and preventing viral infections	COSTIN JOSHUA M_x000D_ WILLIAMS JOHN M_x000D_ LI DAN	(TW201717984)_x000D_ 可斯丁 約書亞Ｍ_x000D_ 威廉斯 約翰Ｍ_x000D_ 李 丹	(EP3344272)_x000D_ COSTIN, Joshua, M._x000D_ WILLIAMS, John, M._x000D_ LI, Dan	HSRX	HSRX	HSRX	(TW201717984)_x000D_ ＨＳＲＸ集團公司			(EP3344272)_x000D_ HSRX Group, LLC ([US])_x000D_ (US20180228853)_x000D_ HSRX GROUP, LLC ([US])_x000D_ (WO201740588)_x000D_ HSRX GROUP, LLC ([US])_x000D_ (CA2996901)_x000D_ HSRX GROUP, LLC ([US])_x000D_ COSTIN, JOSHUA M. ([ZZ])_x000D_ WILLIAMS, JOHN M. ([ZZ])_x000D_ LI, DAN ([ZZ])_x000D_ (TW201717984)_x000D_ HSRX GROUP, LLC_x000D_ (IN201817009047)_x000D_ HSRX GROUP LLC ([US])	(EP3344272)_x000D_ HSRX Group, LLC_x000D_ (US20180228853)_x000D_ HSRX GROUP, LLC_x000D_ (WO201740588)_x000D_ HSRX GROUP, LLC_x000D_ (CA2996901)_x000D_ LI, DAN; HSRX GROUP, LLC; COSTIN, JOSHUA M.; WILLIAMS, JOHN M._x000D_ (IN201817009047)_x000D_ HSRX GROUP LLC	CA	CORPORATE	US	(EP3344272)_x000D_ US_x000D_ (US20180228853)_x000D_ US_x000D_ (WO201740588)_x000D_ US_x000D_ (CA2996901)_x000D_ ZZ; US_x000D_ (IN201817009047)_x000D_ US	(EP3344272)_x000D_ NAME=HSRX Group, LLC 6390 E. Tanque Verde Suite B , CITY=Tucson, AZ 85715 , COUNTRY=US , REG=101655606 _x000D_ _x000D_ (US20180228853)_x000D_ NAME=HSRX GROUP, LLC , CITY=Tucson , STATE=AZ , COUNTRY=US _x000D_ _x000D_ (WO201740588)_x000D_ NAME=HSRX GROUP, LLC 6390 E. Tanque Verde, Suite B Tucson, AZ 85715 , POSTCODE=85715 , COUNTRY=US _x000D_ _x000D_ (CA2996901)_x000D_ NAME=HSRX…	(EP3344272)_x000D_ US	(EP3344272)_x000D_ NAME=COSTIN, Joshua, M. 646 Park Shore Drive , CITY=Naples, FL 34103 , COUNTRY=US _x000D_ _x000D_ NAME=WILLIAMS, John, M. 4702 Swordfish Street , CITY=Bonita Springs, FL 34134 , COUNTRY=US _x000D_ _x000D_ NAME=LI, Dan 9960 Estero Oaks Dr. Apt. 105 , CITY=Fort Myers, FL 33967 , COUNTRY=US _x000D_	PENDING	(EP3344272)_x000D_ PENDING_x000D_ (US20180228853)_x000D_ PENDING_x000D_ (WO201740588)_x000D_ PENDING_x000D_ (CA2996901)_x000D_ PENDING_x000D_ (TW201717984)_x000D_ PENDING_x000D_ (IN201817009047)_x000D_ PENDING_x000D_ (CN108463232)_x000D_ PENDING	ALIVE	(EP3344272)_x000D_ ALIVE_x000D_ (US20180228853)_x000D_ ALIVE_x000D_ (WO201740588)_x000D_ ALIVE_x000D_ (CA2996901)_x000D_ ALIVE_x000D_ (TW201717984)_x000D_ ALIVE_x000D_ (IN201817009047)_x000D_ ALIVE_x000D_ (CN108463232)_x000D_ ALIVE		(EP3344272)_x000D_ 2036-08-31_x000D_ (US20180228853)_x000D_ 2036-08-31_x000D_ (WO201740588)_x000D_ 2019-02-28_x000D_ (CA2996901)_x000D_ 2036-08-31_x000D_ (TW201717984)_x000D_ 2036-08-31_x000D_ (IN201817009047)_x000D_ 2038-03-12_x000D_ (CN108463232)_x000D_ 2036-08-31	A61K-036/185	A61K-036/60	7	0	3	19	7	(EP3344272)_x000D_ Contracting States: AL AT BE BG CH CY CZ DE DK EE ES FI FR GB GR HR HU IE IS IT LI LT LU LV MC MK MT NL NO PL PT RO RS SE SI SK SM TR_x000D_ Extension States: BA ME_x000D_ (WO201740588)_x000D_ National States: AE AG AL AM AO AT AU AZ BA BB BG BH BN BR BW BY BZ CA CH CL CN CO CR CU CZ DE DK DM DO DZ EC EE EG ES FI GB GD GE GH GM GT HN HR HU ID IL IN IR IS JP KE KG KN KP KR KZ LA…	Pharmaceuticals	(US20180228853)_x000D_ BIOMARKER(100,151)_x000D_ VIRAL INFECTION(100,6)_x000D_ FLAVIVIRUS GENUS VIRUS(95,2)_x000D_ RELATIVE ABUNDANCE(64,93)_x000D_ ANTIBODY DEP ENDENT(62,2)_x000D_ ACCURATE MASS(58,48)_x000D_ ENVELOPE VIRUS INFECTION(56,9)_x000D_ INFLUENZA VIRUS HEMAGGLUTININ(52,7)_x000D_ CELL ZIKA VIRUS INFECTION(52,1)_x000D_ VIRAL INFECTION PREVENTION(52,1)_x000D_ VIRUS INFECTION SYMPTOM(49,1)_…	(EP3344272)_x000D_ The present invention relates generally to compositions and methods of use that include compounds that treat and prevent viral infections.	(US20180228853)_x000D_ The variation in virus components leads to a great variation in diseases, complications, and symptoms of virus infections._x000D_ There is also a great interest in developing drugs against Zika virus to battle the growing spread of Zika and the threat to unborn children._x000D_ [0008] Infection by dengue virus, an enveloped virus of the flavivirus genus, is a leading cause …	(US20180228853)_x000D_ 1. A composition comprising any one of, or any combination of, the following biomarkers: (a) biomarker 1 having an accurate mass of 112.027 amu and having a relative abundance of at least 2.36%; (b) biomarker 2 having an accurate mass of 126.032 amu and having a relative abundance of at least 33.26%; (c) biomarker 3 having an accurate mass of 155.095 amu and having a relati…	(US20180228853)_x000D_ The present invention relates generally to compositions and methods of use that include compounds that treat and prevent viral infections._x000D_ [0013] The present invention provides a solution to the current problems facing treatment and prevention of viral infections, including envelope virus infections, influenza, and influenza-like illness._x000D_ The present invention…	(WO201740588)_x000D_ International Search Report [Examiner]_x000D_ -ROSCHEK JR, B ET AL.: "Pharmacokinetics of Cyanidin and Anti-Influenza Phytonutrients in an Elder Berry Extract Determined by LC-MS and DART TOF-MS.", ONLINE JOURNAL OF PHARMACOLOGY AND PHARMACOKINETICS, vol. 4, January 2008 (2008-01-01), pages 1 - 17, XP055368875CC=XP; XP055368875 (Cat. A)_x000D_ -ROSCHEK JR, B ET AL.: "Elderber…
75578139	C07D-249/06_x000D_ C07D-271/06_x000D_ C07D-271/107	A01N-057/00	Basic materials chemistry	US62/212,499P	2015US-62212499	2015-08-31	2015	(WO201740693)_x000D_ Broad spectrum antiviral compounds and uses thereof	STEVENSON MARIO_x000D_ RANA TARIQ M		(WO201740693)_x000D_ RANA, Tariq, M._x000D_ STEVENSON, Mario	UNIVERSITY OF CALIFORNIA	UNIVERSITY OF CALIFORNIA	UNIVERSITY OF CALIFORNIA				(WO201740693)_x000D_ THE REGENTS OF THE UNIVERSITY OF CALIFORNIA ([US])	(WO201740693)_x000D_ THE REGENTS OF THE UNIVERSITY OF CALIFORNIA	US	ACADEMY	US	(WO201740693)_x000D_ US	(WO201740693)_x000D_ NAME=THE REGENTS OF THE UNIVERSITY OF CALIFORNIA 1111 Franklin Street, 12th Floor Oakland, CA 94607-5200 , POSTCODE=94607-5200 , COUNTRY=US _x000D_	(WO201740693)_x000D_ US	(WO201740693)_x000D_ NAME=RANA, Tariq, M. 10610 Briarlake Woods Drive San Diego, CA 92130 , POSTCODE=92130 , COUNTRY=US _x000D_ _x000D_ NAME=STEVENSON, Mario Life Science Technology Park 1951 N.w. 7th Avenue, Room 2331b Miami, FL 33136 , POSTCODE=33136 , COUNTRY=US _x000D_	PENDING	PENDING	ALIVE	ALIVE		2019-10-29	C07D-271/107	A01N-057/00	1	0	2	0	1	(WO201740693)_x000D_ National States: AE AG AL AM AO AT AU AZ BA BB BG BH BN BR BW BY BZ CA CH CL CN CO CR CU CZ DE DK DM DO DZ EC EE EG ES FI GB GD GE GH GM GT HN HR HU ID IL IN IR IS JP KE KG KN KP KR KZ LA LC LK LR LS LU LY MA MD ME MG MK MN MW MX MY MZ NA NG NI NO NZ OM PA PE PG PH PL PT QA RO RS RU RW SA SC SD SE SG SK SL SM ST SV SY TH TJ TM TN TR TT TZ UA UG US UZ VC VN ZA ZM ZW_x000D_ ARI…	Basic materials chemistry	(WO201740693)_x000D_ UNSUB STITUTED HETEROARYL(100,1)_x000D_ DISEASE SYMPTOM PROGRESSION(65,1)_x000D_ MEMBERED HETEROARYL(64,6)_x000D_ UNSUBSTITUTED HETEROALKVL(60,1)_x000D_ TARGET MOLECULE ACTIVITY(34,1)_x000D_ VIF PROTEIN ACTIVITY(31,3)_x000D_ CYCLOALKYL(25,26)_x000D_ ACTIVE INGREDIENT(24,1)_x000D_ HETEROALKYL(23,23)_x000D_ HETEROARYL(22,21)_x000D_ HETEROCVCIOALKYL(22,3)_x000D_ ZIKA VIRUS INFEC…	(WO201740693)_x000D_ Disclosed herein, inter alia, are agents having antiviral activity and methods of use thereof.	(WO201740693)_x000D_ [0004] Vif is necessary for the replication of HIV-1 and promotes viral replication by neutralizing a host antiviral protein known as apobec 3._x000D_ When administered in methods to treat a disease, such compositions will contain an amount of active ingredient effective to achieve the desired result, e.g., modulating the activity of a target molecule, and/or reducing, elimin…	(WO201740693)_x000D_ 1. A compound, or a pharmaceutically acceptable salt thereof, having the formula: wherein_x000D_ 5. Ring A is a substituted or unsubstituted 5 membered heteroaryl;_x000D_ 6. Ring B is a phenyl or 6 membered heteroaryl; R1 is independently halogen, -CX \ -Ci iN1.;, -CH2XX, -CN, -OH, -NH2, -COOH, -CQNH2, -N02, SH, -SQ3H, -S04H, -SG2NH2, -NHNH2, -ONH2, -NHC(0)NHNH2, -NHC(0)NH2, …	(WO201740693)_x000D_ [0026] In another aspect, there is provided a method for treating a viral infection._x000D_ [0024] In an aspect is provided a method of inhibiting a degradation complex (e.g., as described herein) activity in a subject in need thereof, the method including administering an effective amount of a compound (e.g., as described herein), or a pharmaceutically acceptable salt thereo…	(WO201740693)_x000D_ International Search Report [Examiner]_x000D_ -MOHAMMED ET AL.: "SAR and Lead Optimization of an HIV-1 Vif-APOBEC3G Axis Inhibitor", ACS MEDICINAL CHEMISTRY LETTERS, vol. 3, no. 6, 2012, pages 465 - 469, XP055367321CC=XP; XP055367321 (Cat. Y)
75604176	A61K-2039/505_x000D_ C07K-016/10/81_x000D_ G01N-033/569/83_x000D_ G01N-033/577_x000D_ G01N-2800/26_x000D_ Y02A-050/392	A61K-039/42_x000D_ A61P-031/14_x000D_ C07K-016/10_x000D_ C12N-015/13_x000D_ C12N-015/85_x000D_ G01N-033/569_x000D_ G01N-033/577	Analysis of biological materials_x000D_ Pharmaceuticals	CN201610911251	2016CN-0911251	2016-10-19	2016	(CN106478815)_x000D_ Method for rapidly preparing Zika-virus specific full human monoclonal antibodies and application	YU LEI_x000D_ ZHANG FUCHUN_x000D_ YIN CHIBIAO_x000D_ GUAN YONGJUN	(CN106478815)_x000D_ 庾蕾_x000D_ 张复春_x000D_ 尹炽标_x000D_ 管永军	(CN106478815)_x000D_ YU LEI_x000D_ ZHANG FUCHUN_x000D_ YIN CHIBIAO_x000D_ GUAN YONGJUN	GUANGZHOU NO 8 PEOPLE S HOSPITAL	GUANGZHOU NO 8 PEOPLE S HOSPITAL	GUANGZHOU NO 8 PEOPLE S HOSPITAL	(CN106478815)_x000D_ 广州市第八人民医院			(CN106478815)_x000D_ GUANGZHOU NO.8 PEOPLE'S HOSPITAL		CN	ACADEMY	CN					PENDING	PENDING	ALIVE	ALIVE		2036-10-19	Y02A-050/392	C07K-016/10	1	0	0	0	1		Analysis of biological materials_x000D_ Pharmaceuticals	(CN106478815)_x000D_ FULLY HUMAN MONOCLONAL ANTIBODY(100,24)_x000D_ ZIKA VIRUS(100,10)_x000D_ ZIKA VIRUS RAPID PREPARATION(100,7)_x000D_ RAPID(100,3)_x000D_ DIAGNOSIS(100,2)_x000D_ MEDICAMENT MANUFACTURE(100,1)_x000D_ MONOCLONAL ANTIBODY PREPARATION(100,1)_x000D_ REAGENT APPLICATION(100,1)_x000D_ SPEED(100,1)_x000D_ PCR AMPLIFICATION(52,9)_x000D_ PCR AMPLIFICATION PHUSION POLYMERASE(48,1)_x000D_ …	(CN106478815)_x000D_ The invention belongs to the field of medical biology, and particularly relates to a method for rapidly preparing Zika-virus specific full human monoclonal antibodies and an application.The method for rapidly preparing the Zika-virus specific full human monoclonal antibodies includes the steps of peripheral blood mononuclear cell separating, plasma cell separating, antibody-v…	(CN106478815)_x000D_ In summary, the present invention provides fully human monoclonal antibodies specific for the rapid preparation of Zika virus of the method, as compared with the prior art has the following advantages:_x000D_ However, using a mouse-derived antibody for the treatment of human diseases there is a risk of a detrimental immune response against a foreign protein occurs._x000D_ The…	(CN106478815)_x000D_ 1. Zika virus-specific a rapid method of preparing fully human monoclonal antibodies, characterized in, comprises the following steps: Peripheral blood mono nuclear cells isolated S1: EDTA anticoagulant Take Zika peripheral vein acute phase of infection, using density gradient centrifugation method isolated peripheral blood mono nuclear cells, dispensing 2-4x106 /tube, placed…	(CN106478815)_x000D_ The present invention provides fully human monoclonal antibodies specific for the rapid preparation of Zika virus include peripheral blood mono nuclear cells of the separation method, a plasma cell isolation, PCR amplification of antibody variable region genes, antibody cloning and co-transfected and identification steps._x000D_ The present invention provides fully human mono…
75637091	A01M-007/00/03_x000D_ A01M-029/34_x000D_ A61H-033/00/87_x000D_ A61H-033/6005_x000D_ A61H-033/6068_x000D_ A61H-2033/0037_x000D_ B05B-001/20/2_x000D_ B05B-009/04/23_x000D_ B05B-013/02/78_x000D_ B05B-015/06/5_x000D_ B05B-015/65	A01M-007/00_x000D_ A01M-029/12_x000D_ A01M-029/34_x000D_ A47K-003/00_x000D_ A61H-033/00_x000D_ B05B-001/14_x000D_ B05B-009/04_x000D_ B05B-013/02_x000D_ B05B-015/06_x000D_ B05B-015/65_x000D_ E04H-004/00_x000D_ E04H-004/06	Chemical engineering_x000D_ Civil engineering_x000D_ Furniture, games_x000D_ Medical technology_x000D_ Other special machines	US15/263,424	2016US-15263424	2016-09-13	2016	(EP3292756)_x000D_ System and method for repelling mosquitoes near a spa	CARGILL BOYD BILLY	(CN206760575U)_x000D_ B·B·嘉吉	(EP3292756)_x000D_ Cargill, Boyd Billy	BB Cargill_x000D_ CARGILL BOYD_x000D_ CARGILL BOYD BILLY			(CN206760575U)_x000D_ B·B·嘉吉			(EP3292756)_x000D_ Cargill, Boyd Billy_x000D_ (US9592178)_x000D_ Cargill Boyd Billy ([US])_x000D_ (CN206760575U)_x000D_ BOYD BILLY CARGILL_x000D_ (AU2016250407)_x000D_ Cargill Boyd	(US9592178)_x000D_ Cargill Boyd Billy	US	ID	US	(US9592178)_x000D_ US	(US9592178)_x000D_ NAME=Cargill Boyd Billy , CITY=Temecula , STATE=CA , COUNTRY=US _x000D_	(US9592178)_x000D_ US	(US9592178)_x000D_ NAME=Cargill Boyd Billy , CITY=Temecula , STATE=CA , COUNTRY=US _x000D_	GRANTED	(EP3292756)_x000D_ PENDING_x000D_ (US9592178)_x000D_ GRANTED_x000D_ (Model)_x000D_ GRANTED_x000D_ (AU2016250407)_x000D_ PENDING	ALIVE	(EP3292756)_x000D_ ALIVE_x000D_ (US9592178)_x000D_ ALIVE_x000D_ (Model)_x000D_ ALIVE_x000D_ (AU2016250407)_x000D_ ALIVE	(US9592178)_x000D_ 2017-03-14_x000D_ (CN206760575U)_x000D_ 2017-12-19	(EP3292756)_x000D_ 2036-10-13_x000D_ (US9592178)_x000D_ 2036-09-13_x000D_ (Model)_x000D_ 2026-12-16_x000D_ (AU2016250407)_x000D_ 2036-10-27	A61H-033/6005	E04H-004/06	4	0	10	4	4	(EP3292756)_x000D_ Contracting States: AL AT BE BG CH CY CZ DE DK EE ES FI FR GB GR HR HU IE IS IT LI LT LU LV MC MK MT NL NO PL PT RO RS SE SI SK SM TR_x000D_ Extension States: BA ME	Chemical engineering_x000D_ Civil engineering_x000D_ Furniture, games_x000D_ Medical technology_x000D_ Other special machines	(EP3292756)_x000D_ SPA(100,88)_x000D_ REPELLING MOSQUITO(100,13)_x000D_ MOSQUITO REPELLING MIST(70,5)_x000D_ MISTING PUMP(69,26)_x000D_ MISTING PUMP INLET(58,8)_x000D_ FLUID COMMUNICATION(56,33)_x000D_ MISTING PUMP OUTLET(53,6)_x000D_ FOG(51,74)_x000D_ CHEMICALLY TREATED SPA(47,5)_x000D_ MOSQUITO DANGER(41,1)_x000D_ TUB STRUCTURE(34,19)_x000D_ FLYING INSECT(32,3)_x000D_ DRAIN ASSEMBLY(30,23)_x000…	(EP3292756)_x000D_ A system (12) for repelling mosquitoes near a spa (11) (referred to herein as a "Zika Mist System" or "ZMS") includes a string of misting devices (14-23) interconnected in fluid communication for mounting on a spa tub structure in order to produce an insect-repelling, spa-water mist over the spa from chemically treated spa water taken from the spa.The ZMS includes a misting pum…	(EP3292756)_x000D_ However, it will be appreciated that variations and modifications may be made to the examples described within the scope of the present invention._x000D_ Embodiments of the present invention alleviate the concern outlined above._x000D_ One problem resulting from such use is the annoyance and danger of mosquitoes and other such flying insects that are attracted to the spa.	(EP3292756)_x000D_ 1. A spa (10), comprising: a tub structure (11); a plurality of misting devices (14-23) mounted on the tub structure in order to produce a mist over the tub structure; a plurality of tubing pieces (25) interconnecting the misting devices in fluid communications with each other; a misting pump (40A) having an inlet (41) and an outlet (42); an output line (42A) connecting the out…	(EP3292756)_x000D_ In a first aspect of the present invention, there is provide a spa, comprising: a tub structure; a plurality of misting devices mounted on the tub structure in order to produce a mist over the tub structure; a plurality of tubing pieces interconnecting the misting devices in fluid communications with each other; a misting pump having an inlet and an outlet; an output line conne…
75650368	C07K-014/005_x000D_ C12N-015/86_x000D_ C12N-2740/15043_x000D_ C12N-2770/24022	C07K-014/08_x000D_ C12N-005/10_x000D_ C12N-015/867	Biotechnology	CN201610968278	2016CN-0968278	2016-10-28	2016	(CN106497884)_x000D_ Recombination HEK-293T cell and secreted Zika virus non-structural protein 1 thereof	CHEN BAIHONG_x000D_ ZHANG YANLING_x000D_ LIU JUN_x000D_ LI HONGWEI_x000D_ GU WEIWANG_x000D_ LI JINGJING_x000D_ LI QINGQING_x000D_ CHOU ZHENZHEN_x000D_ YAN RENHE_x000D_ WANG SHENGYAO	(CN106497884)_x000D_ 陈白虹_x000D_ 张艳玲_x000D_ 刘军_x000D_ 李红卫_x000D_ 顾为望_x000D_ 李静静_x000D_ 李青青_x000D_ 仇珍珍_x000D_ 颜仁和_x000D_ 王升尧	(CN106497884)_x000D_ CHEN BAIHONG_x000D_ ZHANG YANLING_x000D_ LIU JUN_x000D_ LI HONGWEI_x000D_ GU WEIWANG_x000D_ LI JINGJING_x000D_ LI QINGQING_x000D_ QIU ZHENZHEN_x000D_ YAN RENHE_x000D_ WANG SHENGYAO	SOUTHERN MEDICAL UNIVERSITY	SOUTHERN MEDICAL UNIVERSITY	SOUTHERN MEDICAL UNIVERSITY	(CN106497884)_x000D_ 南方医科大学			(CN106497884)_x000D_ SOUTHERN MEDICAL UNIVERSITY		CN	ACADEMY	CN					PENDING	PENDING	ALIVE	ALIVE		2036-10-28	C07K-014/005	C12N-005/10	1	1	0	0	1		Biotechnology	(CN106497884)_x000D_ CELL(100,42)_x000D_ NONSTRUCTURAL PROTEIN(100,7)_x000D_ HOST(100,3)_x000D_ SECRETION ZIKA VIRUS(100,2)_x000D_ RECOMBINANT FOREIGN GENE(100,1)_x000D_ EXOGENOUS GENE(53,1)_x000D_ FOREIGN GENE(52,4)_x000D_ HELPER PLASMID LENTIVIRAL PACKAGING(49,3)_x000D_ LENTIVIRUS RECOMBINANT VECTOR(46,1)_x000D_ LENTIVIRAL EXPRESSION PLASMID(40,2)_x000D_ ROCHE LIGATION KIT(34,4)_x000D_ AMPICILL…	(CN106497884)_x000D_ The invention relates to a recombination HEK-293T cell, which is characterized in that the recombination HEK-293T cell is obtained by transfecting a foreign gene by using an HEK-293T cell as a host, wherein a nucleotide sequence of the foreign gene is shown as SEQ.ID.NO.1.The recombination HEK-293T cell can secrete the non-structural protein 1 used for Zika virus antibody det…	(CN106497884)_x000D_ The present invention has the following advantages:	(CN106497884)_x000D_ 1. A recombinant HEK-293T cells, characterized in, this recombinant HEK-293T cells are HEK-293T cells as a host a recombinant foreign gene obtained, wherein the exogenous gene SEQ.ID.NO.1 as described above is shown.	(CN106497884)_x000D_ The present invention relates to a recombinant HEK-293T cells, characterized in, this recombinant HEK-293T cells are HEK-293T cells transfected with a foreign gene obtained as a host, wherein the foreign gene nucleic acid sequence as shown SEQ.ID.NO.1._x000D_ The present invention relates to the introduction of foreign genetic material and the modified cells, and particularly…
75698770	A61K-009/00/19_x000D_ A61K-009/14/6_x000D_ A61K-009/51/46_x000D_ A61K-031/713_x000D_ A61K-039/00/12_x000D_ A61K-039/002_x000D_ A61K-039/12_x000D_ A61K-039/145_x000D_ A61K-048/00_x000D_ A61K-049/00/93_x000D_ A61K-2039/53_x000D_ A61K-2039/645_x000D_ A61K-2039/70_x000D_ C12N-015/87_x000D_ C12N-015/88_x000D_ C12N-2740/16234_x000D_ C12N-2760/14134_x000D_ C12N-2760/16034_x000D_ C12N-2770/24134_x000D_ C…	A61K_x000D_ A61K-009/00_x000D_ A61K-009/107_x000D_ A61K-009/14_x000D_ A61K-031/713_x000D_ A61K-039/00_x000D_ A61K-039/002_x000D_ A61K-039/12_x000D_ A61K-039/145_x000D_ A61K-047/34_x000D_ A61K-048/00_x000D_ A61K-049/00_x000D_ A61L-031/10_x000D_ A61P-031/00_x000D_ A61P-031/12_x000D_ A61P-031/16_x000D_ A61P-033/02_x000D_ C12N-015/87	Medical technology_x000D_ Pharmaceuticals	US62/222,515P	2015US-62222515	2015-09-23	2015	(EP3352785)_x000D_ Compositions and methods for modified dendrimer nanoparticle vaccine delivery	KHAN OMAR F_x000D_ ANDERSON DANIEL G_x000D_ LANGER ROBERT S_x000D_ CHAHAL JASDAVE S_x000D_ PLOEGH HIDDE_x000D_ CANNER DAVID A_x000D_ JACKS TYLER E		(EP3352785)_x000D_ KHAN, Omar, F._x000D_ ANDERSON, Daniel, G._x000D_ LANGER, Robert, S._x000D_ CHAHAL, Jasdave, S._x000D_ PLOEGH, Hidde_x000D_ CANNER, David A._x000D_ JACKS, Tyler E.	MIT - MASSACHUSETTS INSTITUTE OF TECHNOLOGY_x000D_ WHITEHEAD INSTITUTE FOR BIOMEDICAL RESEARCH	MIT - MASSACHUSETTS INSTITUTE OF TECHNOLOGY_x000D_ WHITEHEAD INSTITUTE FOR BIOMEDICAL RESEARCH	MIT - MASSACHUSETTS INSTITUTE OF TECHNOLOGY_x000D_ WHITEHEAD INSTITUTE FOR BIOMEDICAL RESEARCH		PLOEGH HIDDE; FROM 2016-09-23 TO 2016-10-18_x000D_ JACKS TYLER E; FROM 2016-09-23 TO 2017-05-14_x000D_ CANNER DAVID A; FROM 2016-09-23 TO 2017-05-23_x000D_ CHAHAL JASDAVE S; FROM 2016-09-23 TO 2017-06-09_x000D_ MIT - MASSACHUSETTS INSTITUTE OF TECHNOLOGY; FROM 2016-09-23_x000D_ WHITEHEAD INSTITUTE FOR BIOMEDICAL RESEARCH; FROM 2016-10-18_x000D_ HOWARD HUGHES MEDICAL INSTITUTE; FROM 2017-05-14 TO …	(US20170079916)_x000D_ WHITEHEAD INSTITUTE FOR BIOMEDICAL RESEARCH; EFFD=2017-06-27_x000D_ US NATIONAL INSTITUTES OF HEALTH (NIH); EFFD=2017-01-23_x000D_ MIT - MASSACHUSETTS INSTITUTE OF TECHNOLOGY; EFFD=2017-05-23_x000D_ HOWARD HUGHES MEDICAL INSTITUTE MARYLAND; EFFD=2017-05-14	(EP3352785)_x000D_ Massachusetts Institute Of Technology ([US])_x000D_ Whitehead Institute for Biomedical Research ([US])_x000D_ (US20170079916)_x000D_ Massachusetts Institute of Technology ([US])_x000D_ Whitehead Institute for Biomedical Research ([US])_x000D_ (WO201753851)_x000D_ MASSACHUSETTS INSTITUTE OF TECHNOLOGY ([US])_x000D_ WHITEHEAD INSTITUTE FOR BIOMEDICAL RESEARCH ([US])_x000D_ (CA299…	(EP3352785)_x000D_ Massachusetts Institute Of Technology; Whitehead Institute for Biomedical Research_x000D_ (US20170079916)_x000D_ Massachusetts Institute of Technology; Whitehead Institute for Biomedical Research_x000D_ (WO201753851)_x000D_ WHITEHEAD INSTITUTE FOR BIOMEDICAL RESEARCH; MASSACHUSETTS INSTITUTE OF TECHNOLOGY_x000D_ (CA2999916)_x000D_ KHAN, OMAR F.; CANNER, DAVID A.; ANDERSON, DANI…	AU	ACADEMY;ACADEMY	US	(EP3352785)_x000D_ US_x000D_ (US20170079916)_x000D_ US_x000D_ (WO201753851)_x000D_ US_x000D_ (CA2999916)_x000D_ ZZ; US	(EP3352785)_x000D_ NAME=Massachusetts Institute Of Technology 77 Massachusetts Avenue , CITY=Cambridge, MA 02139 , COUNTRY=US , REG=101525361 _x000D_ _x000D_ NAME=Whitehead Institute for Biomedical Research 9 Cambridge Center , CITY=Cambridge, MA 02142 , COUNTRY=US , REG=101693063 _x000D_ _x000D_ (US20170079916)_x000D_ NAME=Massachusetts Institute of Technology , CITY=Cambridge , STATE=MA , COUNT…	(EP3352785)_x000D_ US	(EP3352785)_x000D_ NAME=KHAN, Omar, F. 10 Rogers Street Unit 431 , CITY=Cambridge, MA 02142 , COUNTRY=US _x000D_ _x000D_ NAME=ANDERSON, Daniel, G. 78 Carter Drive , CITY=Framingham, MA 01701 , COUNTRY=US _x000D_ _x000D_ NAME=LANGER, Robert, S. 98 Montvale Road , CITY=Newton, MA 02459 , COUNTRY=US _x000D_ _x000D_ NAME=CHAHAL, Jasdave, S. 131 Massachusetts Avenue Apt. 1 , CITY=Arlington, MA 02474 ,…	PENDING	(EP3352785)_x000D_ PENDING_x000D_ (US20170079916)_x000D_ PENDING_x000D_ (WO201753851)_x000D_ PENDING_x000D_ (CA2999916)_x000D_ PENDING_x000D_ (AU2016326695)_x000D_ PENDING_x000D_ (IL258055)_x000D_ PENDING	ALIVE	(EP3352785)_x000D_ ALIVE_x000D_ (US20170079916)_x000D_ ALIVE_x000D_ (WO201753851)_x000D_ ALIVE_x000D_ (CA2999916)_x000D_ ALIVE_x000D_ (AU2016326695)_x000D_ ALIVE_x000D_ (IL258055)_x000D_ ALIVE		(EP3352785)_x000D_ 2036-09-23_x000D_ (US20170079916)_x000D_ 2036-09-23_x000D_ (WO201753851)_x000D_ 2019-03-23_x000D_ (CA2999916)_x000D_ 2036-09-23_x000D_ (AU2016326695)_x000D_ 2036-09-23_x000D_ (IL258055)_x000D_ 2036-09-23	A61K-039/00/12	A61K-039/002	6	1	1	18	6	(EP3352785)_x000D_ Contracting States: AL AT BE BG CH CY CZ DE DK EE ES FI FR GB GR HR HU IE IS IT LI LT LU LV MC MK MT NL NO PL PT RO RS SE SI SK SM TR_x000D_ Extension States: BA ME_x000D_ (WO201753851)_x000D_ National States: AE AG AL AM AO AT AU AZ BA BB BG BH BN BR BW BY BZ CA CH CL CN CO CR CU CZ DE DJ DK DM DO DZ EC EE EG ES FI GB GD GE GH GM GT HN HR HU ID IL IN IR IS JP KE KG KN KP KR KW…	Medical technology_x000D_ Pharmaceuticals	(US20170079916)_x000D_ DIAGNOSTIC AGENT(100,34)_x000D_ PROPHYLACTIC(100,33)_x000D_ THERAPEUTIC DELIVERY(100,4)_x000D_ MODIFIED DENDRIMER NANOPARTICLE(100,3)_x000D_ MODIFIED DENDRIMER NANOPARTICLE DELIVERY(100,1)_x000D_ RNA REPLICATION(89,21)_x000D_ GENERATION ALKYLATED DENDRIMER(74,1)_x000D_ EXOGENOUS GENE SUSTAINED EXPRESSION(73,1)_x000D_ DIAMINOBUTANE AMINE POLYPROPYLENIMINE TETRAMINE(61,3)_x00…	(EP3352785)_x000D_ Compositions and methods for modified dendrimer nanoparticle ("MDNP") delivery of therapeutic, prophylactic and/or diagnostic agent such as large repRNA molecules to the cells of a subject have been developed.MDNPs efficiently drive proliferation of antigen-specific T cells against intracellular antigen, and potentiate antigen-specific antibody responses.MDNPs can be multiplexe…	(US20170079916)_x000D_ [0067] MDNPs are useful delivery vehicle for a broad range of molecules to the interior of cells._x000D_ [0005] However, current approaches to the delivery of peptide vaccine antigens often rely on technology that is limited in rapid production capability and associated engineering parameters to influence the type, duration, and potency of an immune response._x000D_ [0007] …	(US20170079916)_x000D_ 1. A modified dendrimer nanoparticle for the delivery of therapeutic, prophylactic and/or diagnostic agents to a subject, comprising: one or more zero to seven generation alkylated dendrimers; one or more amphiphilic polymers; and one or more therapeutic, prophylactic and/or diagnostic agents encapsulated therein.	(US20170079916)_x000D_ [0013] Therefore, it is an object of the invention to provide compositions and methods for intracellular delivery of nucleic acids, proteins and small molecules, by delivery vehicles that exert minimal or no immunogenicity and cytotoxicity. [0014] It is a further object of the invention to provide methods and compositions for the simultaneous delivery of two or more repRNA …	(WO201753851)_x000D_ International Search Report [Examiner]_x000D_ -OMAR F. KHAN ET AL: "Ionizable Amphiphilic Dendrimer-Based Nanomaterials with Alkyl-Chain-Substituted Amines for Tunable siRNA Delivery to the Liver Endothelium In Vivo", ANGEWANDTE CHEMIE INTERNATIONAL EDITION, vol. 53, no. 52, 22 December 2014 (2014-12-22), DE, pages 14397 - 14401, XP055329716, ISSN: 1433-7851, DOI: 10.1002/ani…
75708400	C07K-014/005_x000D_ C07K-2319/30_x000D_ C12N-005/0686_x000D_ C12N-2770/24122_x000D_ C12N-2770/24134	C07K-019/00_x000D_ C12N-005/10_x000D_ C12N-015/867	Biotechnology	CN201610887189	2016CN-0887189	2016-10-11	2016	(CN106520699)_x000D_ Recombinant HEK-293T cell and Zika virus resistant fusion protein secreted by recombinant HEK-293T cell	LI HONGWEI_x000D_ LIU JUN_x000D_ GU WEIWANG_x000D_ LI JINGJING_x000D_ LI QINGQING_x000D_ CHOU ZHENZHEN_x000D_ YAN RENHE_x000D_ WANG SHENGYAO	(CN106520699)_x000D_ 李红卫_x000D_ 刘军_x000D_ 顾为望_x000D_ 李静静_x000D_ 李青青_x000D_ 仇珍珍_x000D_ 颜仁和_x000D_ 王升尧	(CN106520699)_x000D_ LI HONGWEI_x000D_ LIU JUN_x000D_ GU WEIWANG_x000D_ LI JINGJING_x000D_ LI QINGQING_x000D_ QIU ZHENZHEN_x000D_ YAN RENHE_x000D_ WANG SHENGYAO	SOUTHERN MEDICAL UNIVERSITY	SOUTHERN MEDICAL UNIVERSITY	SOUTHERN MEDICAL UNIVERSITY	(CN106520699)_x000D_ 南方医科大学			(CN106520699)_x000D_ SOUTHERN MEDICAL UNIVERSITY		CN	ACADEMY	CN					PENDING	PENDING	ALIVE	ALIVE		2036-10-11	C07K-014/005	C12N-005/10	1	0	0	0	1		Biotechnology	(CN106520699)_x000D_ 293T CELL(100,25)_x000D_ EXOGENOUS GENE FUSION(100,4)_x000D_ RECOMBINANT(100,4)_x000D_ FOREIGN GENE(100,1)_x000D_ SECRETORY(100,1)_x000D_ VIRAL FUSION PROTEIN(100,1)_x000D_ HELPER PLASMID LENTIVIRAL PACKAGING(66,3)_x000D_ LENTIVIRAL EXPRESSION PLASMID(54,2)_x000D_ LENTIVIRAL RECOMBINANT VECTOR(52,2)_x000D_ CULTURED OVERNIGHT CULTURE(50,1)_x000D_ FUSION GENE FRAGMENT(48,2)_x00…	(CN106520699)_x000D_ The invention relates to a recombinant HEK-293T cell.The recombinant HEK-293T cell is characterized in that the recombinant HEK-293T cell is obtained by transfecting an exogenous fusion gene by taking the recombinant HEK-293T cell as a host, wherein a nucleotide sequence of the exogenous fusion gene is shown as SEQ ID NO.1.The recombinant HEK-293T cell can secrete Zika virus …	(CN106520699)_x000D_ The present invention has the following advantages:	(CN106520699)_x000D_ 1. A recombinant HEK-293T cells, characterized in, this recombinant HEK-293T cells are HEK-293T cells transfected with a foreign gene obtained for the host fuzed, wherein the exogenous gene fusion nucleic acid sequence as shown SEQ.ID.NO.1.	(CN106520699)_x000D_ The present invention relates to a recombinant HEK-293T cells, characterized in, this recombinant HEK-293T cells are HEK-293T cells transfected with an exogenous gene fusion to a host is obtained, wherein the exogenous gene fusion nucleic acid sequence as shown SEQ.ID.NO.1._x000D_ The present invention relates to the introduction of foreign genetic material and the modified c…
75713833	A61K-039/12_x000D_ A61K-2039/55505_x000D_ C07K-014/005_x000D_ C12N-2770/24122_x000D_ C12N-2770/24134_x000D_ G01N-033/569/83_x000D_ G01N-033/68/54_x000D_ G01N-2469/20_x000D_ Y02A-050/392	A61K-039/12_x000D_ A61P-031/14_x000D_ C07K-014/18_x000D_ C12N-001/21_x000D_ C12N-015/40_x000D_ C12N-015/70_x000D_ G01N-033/569_x000D_ G01N-033/68	Analysis of biological materials_x000D_ Pharmaceuticals	CN201610518145	2016CN-0518145	2016-07-04	2016	(CN106518990)_x000D_ Zika virus antigen and application thereof	CAO JIANRONG_x000D_ LIN XIAOJING	(CN106518990)_x000D_ 曹健荣_x000D_ 林小靖	(CN106518990)_x000D_ CAO JIANRONG_x000D_ LIN XIAOJING	BEIJING BIOTECHNOLOGY	BEIJING BIOTECHNOLOGY	BEIJING BIOTECHNOLOGY	(CN106518990)_x000D_ 德诺杰亿（北京）生物科技有限公司			(CN106518990)_x000D_ DENOGEN (BEIJING) BIO-SCI & TECH CO., LTD.		CN	CORPORATE	CN					PENDING	PENDING	ALIVE	ALIVE		2036-11-24	Y02A-050/392	C07K-014/18	1	0	0	0	1		Analysis of biological materials_x000D_ Pharmaceuticals	(CN106518990)_x000D_ PROTEIN(100,14)_x000D_ ZIKA VIRUS ANTIGEN(100,14)_x000D_ AFFINITY CHROMATOGRAPHY(100,4)_x000D_ DNA SEQUENCE(100,4)_x000D_ EXPRESSION VECTOR(100,4)_x000D_ BIOLOGICAL PRODUCT(100,3)_x000D_ DNA ANALYSIS(100,3)_x000D_ PROTEIN RENATURATION(100,3)_x000D_ PROTEIN SEQUENCE(100,3)_x000D_ ZIKA VIRUS PROTEIN(100,3)_x000D_ DNA SEQUENCE ANALYSIS(100,2)_x000D_ PLASMID BASED VECTOR(100,2)_x…	(CN106518990)_x000D_ The invention provides a Zika virus antigen and application thereof, and belongs to the technical field of protein engineering.DNA sequences corresponding to a protein sequence determined through DNA analysis and protein structure analysis are synthesized, Nde I and Xho I cleavage sites are introduced, a commercialized pET30a plasmid serves as a basic carrier, pZE400 is built…	(CN106518990)_x000D_ It is therefore necessary to Zika virus E protein to be studied, Zika virus E protein is established for prokaryotic expression of the expression and purification processes, Zika virus antigen obtained good biological activity, in order to solve the problem._x000D_ Whether making Zika virus detection reagent or Zika virus vaccine, to obtain a good high-purity of the active an…	(CN106518990)_x000D_ 1. One Zika virus antigen, characterized in, having: Of the amino acid sequence (1) SEQ ID NO.1 Of the amino acid sequence by a deletion (2) SEQ ID NO.1, insertion or substitution of the amino acid sequence of the obtained having the same function._x000D_ 3. Claim 2 as an expression vector containing._x000D_ 5. Claim 1 Zika virus antigen expression and purification of the met…	(CN106518990)_x000D_ The present invention provides a Zika virus antigen and its uses, which belongs to the technical field of protein engineering._x000D_ The present invention relates to the field of viral immunity, in particular, relates to Zika virus antigen and its uses._x000D_ Is an object of the present invention is analyzed and screened through Zika virus E protein, a native sequence Zika …
75718700	C12Q-001/68/44_x000D_ C12Q-001/68/65_x000D_ C12Q-001/70/1_x000D_ Y02A-050/51_x000D_ Y02A-050/53	C12N-015/11_x000D_ C12Q-001/68_x000D_ C12Q-001/70_x000D_ C12R-001/93	Biotechnology	CN201611089150	2016CN-1089150	2016-11-30	2016	(CN106521032)_x000D_ Nucleic acid amplification technology and application thereof in detection of mosquito-borne viruses	ZHANG YAN_x000D_ GAI WEI_x000D_ XING WANLI_x000D_ SONG CUIDAN_x000D_ CHENG JING	(CN106521032)_x000D_ 张岩_x000D_ 盖伟_x000D_ 邢婉丽_x000D_ 宋翠丹_x000D_ 程京	(CN106521032)_x000D_ ZHANG YAN_x000D_ GAI WEI_x000D_ XING WANLI_x000D_ SONG CUIDAN_x000D_ CHENG JING	CAPITALBIO	CAPITALBIO	CAPITALBIO	(CN106521032)_x000D_ 博奥生物集团有限公司			(CN106521032)_x000D_ CAPITALBIO GROUP CO., LTD.		CN	CORPORATE	CN					PENDING	PENDING	ALIVE	ALIVE		2036-11-30	Y02A-050/51	C12Q-001/70	1	0	0	0	1		Biotechnology	(CN106521032)_x000D_ PRIMER(100,164)_x000D_ RECOMBINASE POLYMERASE AMPLIFICATION(100,20)_x000D_ NUCLEIC ACID AMPLIFICATION(100,5)_x000D_ RNA(100,5)_x000D_ KIT APPLICATION(100,1)_x000D_ N KIT(100,1)_x000D_ TARGET RNA SEQUENCE DETECTION(100,1)_x000D_ SEQUENCE DNA MOLECULE(78,16)_x000D_ NUCLEOTIDE(70,36)_x000D_ DELETION(58,36)_x000D_ RECOMBINASE POLYMERASE AMPLIFICATION REAGENT(58,2)_x000D_ MOSQUITO…	(CN106521032)_x000D_ The invention discloses a nucleic acid amplification technology and an application thereof in detection of mosquito-borne viruses.The invention provides a method for detecting whether n kinds of target RNA sequences are contained in a sample to be detected or not.The method sequentially comprises the following steps: 1, extracting the total RNA of the sample to be detected; 2…	(CN106521032)_x000D_ A multiplex PCR is in one of the PCR can be an improvement over the technique of simultaneous detection of multiple target genes, typically multiple PCR reaction system has at least two or more pairs of primers, may be amplified simultaneously in a single reaction of a plurality of nucleic acid fragments, is mainly used for detection or identification of pathogenic microbes w…	(CN106521032)_x000D_ 1. Primer probe combination, as the following (a1) or (a2) or (a3) : (A1) by the primer probe set I, II primer probe sets, primer probe set III, IV primer probe sets, primer and a primer probe set V of a VI probe set; (A2) I by the primer probe sets, primer probe set II, III primer probe sets, primer probe set IV, V and primers of the primer probe set VI probe set any two, an…	(CN106521032)_x000D_ The present invention discloses a nucleic acid amplification techniques and their application in the detection of mosquito-borne viral._x000D_ The present invention provides a method for detecting whether or not n kinds of the target RNA in the sample sequence of a method comprising, sequentially comprising the steps of: (1) extracting a total RNA sample to be tested are subj…
75721688	A61K-031/47_x000D_ A61K-045/06_x000D_ Y02A-050/385_x000D_ Y02A-050/387_x000D_ Y02A-050/391	A61K-031/47_x000D_ A61K-045/06_x000D_ A61P-031/14	Pharmaceuticals	CN201611121927	2016CN-1121927	2016-12-08	2016	(CN106511346)_x000D_ Small molecular drug capable of being used for inhibiting Zika virus infection and application of drug	ZOU PENG_x000D_ LU LU_x000D_ JIANG SHIBO	(CN106511346)_x000D_ 邹鹏_x000D_ 陆路_x000D_ 姜世勃	(CN106511346)_x000D_ ZOU PENG_x000D_ LU LU_x000D_ JIANG SHIBO	SHANGHAI PUBLIC HEALTH CLINICAL CENTER	SHANGHAI PUBLIC HEALTH CLINICAL CENTER	SHANGHAI PUBLIC HEALTH CLINICAL CENTER	(CN106511346)_x000D_ 上海市公共卫生临床中心			(CN106511346)_x000D_ SHANGHAI PUBLIC HEALTH CLINICAL CENTER_x000D_ (CN106983750)_x000D_ SHANGHAI PUBLIC HEALTH CLINICAL CENTER		CN	ACADEMY	CN					PENDING	(CN106511346)_x000D_ LAPSED_x000D_ (CN106983750)_x000D_ PENDING	ALIVE	(CN106511346)_x000D_ DEAD_x000D_ (CN106983750)_x000D_ ALIVE		(CN106511346)_x000D_ 2017-06-13_x000D_ (CN106983750)_x000D_ 2037-04-17	Y02A-050/385	A61K-031/47	1	0	0	5	2		Pharmaceuticals	(CN106511346)_x000D_ ZIKA VIRUS INFECTION(100,14)_x000D_ DRUG MOLECULE(100,5)_x000D_ MEDICAMENT INFECTION ZIKA VIRUS(100,1)_x000D_ SINGULAIR PREPARATION(61,2)_x000D_ ZIKA VIRUS(52,6)_x000D_ INFECTION PREVENTION(51,2)_x000D_ ZIKA VIRUS PREPARATION(51,1)_x000D_ EPIGALLOCATECHIN GALOP(47,3)_x000D_ COMPARISON MICROCEPHALY INFANT(47,1)_x000D_ MEDICAMENT DISEASE(45,1)_x000D_ PREGNANCY MONTH(40,1)_x000D…	(CN106511346)_x000D_ The invention belongs to the technical field of biological medicines and particularly relates to a small molecular drug capable of being used for inhibiting Zika virus infection and an application of the drug, in particular to a method for inhibiting Zika virus infection through Montelukast sodium and an application of Montelukast sodium in preparation of drugs for preventing…	(CN106511346)_x000D_ However it has now been confirmed pregnant woman ZIKV after infection, the virus can penetrate the placental barrier, or can result in serious brain damage or other comparison microcephaly infant occur, especially at the front 3 months of pregnancy._x000D_ As described above, an object of the present invention to provide a Zika virus can be suppressed (ZIKV) infection of the …	(CN106511346)_x000D_ 1. A method of inhibiting Zika virus infected method, comprising administering an effective amount of montelukast sodium._x000D_ 2. Zika virus infection in the preparation of montelukast sodium for inhibiting the use of a medicament._x000D_ 5. For the treatment and/or prevention for the preparation of montelukast sodium Zika virus infection-related disorder or disease of a me…	(CN106511346)_x000D_ More specifically, the present invention relates to a method of infection and their use in inhibiting monteiukast sodium Zika virus preparation for the prophylaxis and/or treatment of a disorder or disease associated with infection Zika virus of a medicament._x000D_ To accomplish the object, the present invention with a small molecule drug library as a base human screening ef…
75901095	C12Q-001/68/25_x000D_ C12Q-001/68/37_x000D_ C12Q-001/70/1_x000D_ G01N-027/02/6_x000D_ G01N-027/327/6_x000D_ G01N-027/327/8_x000D_ Y02A-050/51_x000D_ Y02A-050/53_x000D_ Y02A-050/60	C12Q-001/68_x000D_ C12Q-001/70_x000D_ G01N-027/02_x000D_ G01N-027/327_x000D_ G01N-027/87	Biotechnology_x000D_ Measurement	US62/243,879P	2015US-62243879	2015-10-20	2015	(US20170107565)_x000D_ Functionalized particles for label-free dna impedimetric biosensor for dna and rna sensing	MARINERO-CACERES ESTEBAN ERNESTO_x000D_ KUHN RICHARD J_x000D_ STANCIU LIA ANTOANETA_x000D_ JIN SEON-AH		(US20170107565)_x000D_ Marinero-Caceres Esteban Ernesto_x000D_ Kuhn Richard J._x000D_ Stanciu Lia Antoaneta_x000D_ Jin Seon-Ah	PURDUE RESEARCH FOUNDATION	PURDUE RESEARCH FOUNDATION	PURDUE RESEARCH FOUNDATION		MARINERO CACERES ESTEBAN E; FROM 2016-10-17 TO 2016-10-17_x000D_ PURDUE RESEARCH FOUNDATION; FROM 2016-10-17_x000D_ STANCIU LIA ANTOANETA; FROM 2016-10-18 TO 2016-10-18_x000D_ JIN SEONAH; FROM 2016-10-18 TO 2016-10-18_x000D_ KUHN RICHARD; FROM 2016-10-19 TO 2016-10-26	(US20170107565)_x000D_ PURDUE RESEARCH FOUNDATION; EFFD=2017-01-13	(US20170107565)_x000D_ Purdue Research Foundation ([US])_x000D_ (WO201875085)_x000D_ PURDUE RESEARCH FOUNDATION ([US])	(US20170107565)_x000D_ Purdue Research Foundation_x000D_ (WO201875085)_x000D_ PURDUE RESEARCH FOUNDATION	US	ACADEMY	US	(US20170107565)_x000D_ US_x000D_ (WO201875085)_x000D_ US	(US20170107565)_x000D_ NAME=Purdue Research Foundation , CITY=West Lafayette , STATE=IN , COUNTRY=US , ATYP=US Company _x000D_ _x000D_ (WO201875085)_x000D_ NAME=PURDUE RESEARCH FOUNDATION 1281 Win Hentschel Blvd West Lafayette, Indiana 47906 , POSTCODE=47906 , COUNTRY=US _x000D_	(US20170107565)_x000D_ US	(US20170107565)_x000D_ NAME=Marinero-Caceres Esteban Ernesto , CITY=West Lafayette , STATE=IN , COUNTRY=US _x000D_ _x000D_ NAME=Kuhn Richard J. , CITY=West Lafayette , STATE=IN , COUNTRY=US _x000D_ _x000D_ NAME=Stanciu Lia Antoaneta , CITY=West Lafayette , STATE=IN , COUNTRY=US _x000D_ _x000D_ NAME=Jin Seon-Ah , CITY=West Lafayette , STATE=IN , COUNTRY=US _x000D_	PENDING	(US20170107565)_x000D_ PENDING_x000D_ (WO201875085)_x000D_ PENDING	ALIVE	(US20170107565)_x000D_ ALIVE_x000D_ (WO201875085)_x000D_ ALIVE		(US20170107565)_x000D_ 2036-10-19_x000D_ (WO201875085)_x000D_ 2020-04-19	C12Q-001/68/37	G01N-027/87	2	1	4	2	2	(WO201875085)_x000D_ National States: AE AG AL AM AO AT AU AZ BA BB BG BH BN BR BW BY BZ CA CH CL CN CO CR CU CZ DE DJ DK DM DO DZ EC EE EG ES FI GB GD GE GH GM GT HN HR HU ID IL IN IR IS JP KE KG KN KP KR KW KZ LA LC LK LR LS LU LY MA MD ME MG MK MN MW MX MY MZ NA NG NI NO NZ OM PA PE PG PH PL PT QA RO RS RU RW SA SC SD SE SG SK SL SM ST SV SY TH TJ TM TN TR TT TZ UA UG US UZ VC VN ZA ZM ZW_x000…	Biotechnology_x000D_ Measurement	(US20170107565)_x000D_ BIOSENSOR PLATFORM(100,25)_x000D_ RNA(100,20)_x000D_ VECTOR BORNE VIRUS(100,12)_x000D_ DNA(100,6)_x000D_ BIOSENSOR(0,20)_x000D_ ELECTRODE MATERIAL(0,15)_x000D_ SUPPORTED MEMBRANE(0,10)_x000D_ PROBE(0,9)_x000D_ IMMOBILIZED(0,8)_x000D_ FUNCTIONALIZED ELECTRODE SURFACE(0,7)_x000D_ IMPEDANCE(0,7)_x000D_ DNA VIRUS(0,5)_x000D_ PRIMER NUCLEOTIDE(0,5)_x000D_ NUCLEOTIDE PRIMER IMMOB…	(US20170107565)_x000D_ In one embodiment, 3-Aminopropyltriethoxysilane (APTES) functionalized graphene oxide (APTES-GO) wrapped SiO2 particle composite (SiO2@APTES-GO) was prepared via the self-assembly process of APTES-GO sheets and SiO2 particles.Transmission electron microscopy (TEM) and Attenuated Total Reflectance-Fourier Transform Infrared spectroscopy (ATR-FTIR) confirmed wrapping of the S…	(US20170107565)_x000D_ [0004] Insect-borne viral diseases are a problem on a global scale._x000D_ For example, dengue fever is one of the most important arthropod-borne viral diseases that can lead to complications such as dengue hemorrhagic fever (DHF), dengue shock syndrome (DSS), and has the capacity to rapidly spread once a viral outbreak is established (Guzman and Harris, 2015)._x000D_ Howev…	(US20170107565)_x000D_ 1. A biosensor platform configured to provide impedimetric data in the presence of a virus DNA or RNA, comprising: an electrode material coupled to at least one functionalized particle; a supporting membrane, wherein the electrode material is disposed on the supporting membrane; and a label-free virus DNA or RNA immobilized to said electrode material, wherein said DNA or RN…	(US20170107565)_x000D_ [0011] This disclosure in general relates to a biosensor platform that is configured to provide impedimetric data in the presence of an insect-borne virus._x000D_ [0012] This disclosure provides a biosensor platform to detect at least one vector borne virus._x000D_ [0022] This disclosure further provides a method for detecting at least one vector borne virus.
75934962	A61K-031/10_x000D_ A61K-031/131_x000D_ A61K-031/4164_x000D_ A61K-031/43_x000D_ A61K-031/496_x000D_ A61K-031/546_x000D_ A61K-031/65_x000D_ A61K-031/7048_x000D_ A61K-031/7056_x000D_ A61K-038/14_x000D_ A61K-045/06_x000D_ Y02A-050/469	A61K-031/03_x000D_ A61K-031/055_x000D_ A61K-031/095_x000D_ A61K-039/07_x000D_ C12R-001/16	Pharmaceuticals	US62/244,601P	2015US-62244601	2015-10-21	2015	(WO201770538)_x000D_ Inhibition of multiple pathogenic agents using bithionol	MARTCHENKO MIKHAIL_x000D_ LEONARDI WILLIAM		(WO201770538)_x000D_ MARTCHENKO, Mikhail_x000D_ LEONARDI, William	KECK GRADUATE INSTITUTE OF APPLIED LIFE SCIENCES	KECK GRADUATE INSTITUTE OF APPLIED LIFE SCIENCES	KECK GRADUATE INSTITUTE OF APPLIED LIFE SCIENCES				(WO201770538)_x000D_ KECK GRADUATE INSTITUTE OF APPLIED LIFE SCIENCES ([US])	(WO201770538)_x000D_ KECK GRADUATE INSTITUTE OF APPLIED LIFE SCIENCES	US	ACADEMY	US	(WO201770538)_x000D_ US	(WO201770538)_x000D_ NAME=KECK GRADUATE INSTITUTE OF APPLIED LIFE SCIENCES 535 Watson Drive Claremont, California 91711 , POSTCODE=91711 , COUNTRY=US _x000D_	(WO201770538)_x000D_ US	(WO201770538)_x000D_ NAME=MARTCHENKO, Mikhail 535 Watson Drive Claremont, California 91711 , POSTCODE=91711 , COUNTRY=US _x000D_ _x000D_ NAME=LEONARDI, William 3745 Strang Ave. Rosemead, California 91170 , POSTCODE=91170 , COUNTRY=US _x000D_	PENDING	PENDING	ALIVE	ALIVE		2019-10-11	A61K-031/131	A61K-031/095	1	0	1	0	1	(WO201770538)_x000D_ National States: AE AG AL AM AO AT AU AZ BA BB BG BH BN BR BW BY BZ CA CH CL CN CO CR CU CZ DE DJ DK DM DO DZ EC EE EG ES FI GB GD GE GH GM GT HN HR HU ID IL IN IR IS JP KE KG KN KP KR KW KZ LA LC LK LR LS LU LY MA MD ME MG MK MN MW MX MY MZ NA NG NI NO NZ OM PA PE PG PH PL PT QA RO RS RU RW SA SC SD SE SG SK SL SM ST SV SY TH TJ TM TN TR TT TZ UA UG US UZ VC VN ZA ZM ZW_x000…	Pharmaceuticals	(WO201770538)_x000D_ PATHOGENIC AGENT(100,18)_x000D_ PSEUDOMONAS AERUGINOSA EXOTOXIN(96,12)_x000D_ BITHIONOL PREVENTED DEATH ADMINISTRATION(92,1)_x000D_ HOST CASPASE INHIBITOR(88,1)_x000D_ BACILLUS ANTHRACIS(76,5)_x000D_ ANTHRAX TOXIN(75,13)_x000D_ BITHIONOL(74,94)_x000D_ ANTIBIOTIC(73,21)_x000D_ CASPASE DEPENDENT PATHOGENIC AGENT(71,7)_x000D_ TOXIN DEPICTION(71,1)_x000D_ DIPHTHERIA TOXIN(65,13)_…	(WO201770538)_x000D_ Compositions and methods including Bithionol are provided for treating, inhibiting, or preventing caspase-dependent pathogenic agents in a host cell or infected subject.Examples of caspase-dependent pathogenic agents include ricin, anthrax toxin, Botulinum neurotoxin A, diphtheria toxin, Pseudomonas aeruginosa exotoxin A, cholera toxin, Zika virus, and combinations thereof.Co…	(WO201770538)_x000D_ Thus, for some subjects exposed to such pathogens, treatment that combines Bithionol with an antibiotic may produce better clinical results than Bithionol alone._x000D_ [0011] FIG. 1 B is a depiction of the design of the current study in which the known host pathways and host proteins exploited by pathogens (HPEP) are considered, HapMap cell lines are used to study the associ…	(WO201770538)_x000D_ 1 . A method of inhibiting a pathogenic agent in a host cell or in a subject, the method comprising administering Bithionol to the host cell or the subject, the pathogenic agent being selected from the group consisting of ricin, anthrax toxin, Botulinum neurotoxin A, diphtheria toxin, Pseudomonas aeruginosa exotoxin A, cholera toxin, Zika virus, and combinations thereof._x000…		(WO201770538)_x000D_ International Search Report [Examiner]_x000D_ -CRUZ, AC: "Treatment of Human Taeniasis in the Phillipines: A Review.", THE SOUTHEAST ASIAN JOURNAL OF TROPICAL MEDICINE AND PUBLIC HEALTH., vol. 22, December 1991 (1991-12-01), pages 271 - 274, XP055376820CC=XP; XP055376820 (Cat. A)_x000D_ -AYYAGARI, VN ET AL.: "Bithionol Inhibits Ovarian Cancer Cell Growth In Vitro - Studies on…
75935042	A61K-009/00/19_x000D_ A61K-009/127/1_x000D_ A61K-009/51/3_x000D_ A61K-039/015_x000D_ A61K-039/12_x000D_ A61K-039/39_x000D_ A61K-039/42_x000D_ A61K-048/00_x000D_ A61K-2039/51_x000D_ A61K-2039/5254_x000D_ A61K-2039/53_x000D_ A61K-2039/55511_x000D_ A61K-2039/55555_x000D_ A61K-2039/575_x000D_ C12N-2770/24034_x000D_ C12N-2770/24134_x000D_ C12N-2770/36134	A61K-009/10_x000D_ A61K-039/00_x000D_ A61K-039/12_x000D_ A61K-048/00	Pharmaceuticals	US62/244,814P	2015US-62244814	2015-10-22	2015	(EP3364950)_x000D_ Tropical disease vaccines	CIARAMELLA GIUSEPPE_x000D_ HIMANSU SUNNY_x000D_ HUANG ERIC YI-CHUN_x000D_ ZAKS TAL		(EP3364950)_x000D_ CIARAMELLA, Giuseppe_x000D_ HIMANSU, Sunny_x000D_ HUANG, Eric, Yi-Chun_x000D_ ZAKS, Tal	MODERNATX	MODERNATX	MODERNATX				(EP3364950)_x000D_ ModernaTX, Inc. ([US])_x000D_ (WO201770624)_x000D_ MODERNATX, INC. ([US])	(EP3364950)_x000D_ ModernaTX, Inc._x000D_ (WO201770624)_x000D_ MODERNATX, INC.	EP	CORPORATE	US	(EP3364950)_x000D_ US_x000D_ (WO201770624)_x000D_ US	(EP3364950)_x000D_ NAME=ModernaTX, Inc. 320 Bent Street , CITY=Cambridge, MA 02141 , COUNTRY=US , REG=101636188 _x000D_ _x000D_ (WO201770624)_x000D_ NAME=MODERNATX, INC. 320 Bent Street Cambridge, MA 02141 , POSTCODE=02141 , COUNTRY=US _x000D_	(EP3364950)_x000D_ US	(EP3364950)_x000D_ NAME=CIARAMELLA, Giuseppe 1 Hawes Road , CITY=Sudbury, MA 01776 , COUNTRY=US _x000D_ _x000D_ NAME=HIMANSU, Sunny 23 Fernway , CITY=Winchester, MA 01890 , COUNTRY=US _x000D_ _x000D_ NAME=HUANG, Eric, Yi-Chun 90 Wareham Street Apartment 302 , CITY=Boston, MA 02118 , COUNTRY=US _x000D_ _x000D_ NAME=ZAKS, Tal 122 Bellevue Street , CITY=Newton, MA 02458 , COUNTRY=US _x000D_	PENDING	(EP3364950)_x000D_ PENDING_x000D_ (WO201770624)_x000D_ PENDING	ALIVE	(EP3364950)_x000D_ ALIVE_x000D_ (WO201770624)_x000D_ ALIVE		(EP3364950)_x000D_ 2036-10-21_x000D_ (WO201770624)_x000D_ 2019-04-22	A61K-039/12	A61K-009/10	2	2	3	0	2	(EP3364950)_x000D_ Contracting States: AL AT BE BG CH CY CZ DE DK EE ES FI FR GB GR HR HU IE IS IT LI LT LU LV MC MK MT NL NO PL PT RO RS SE SI SK SM TR_x000D_ Extension States: BA ME_x000D_ (WO201770624)_x000D_ National States: AE AG AL AM AO AT AU AZ BA BB BG BH BN BR BW BY BZ CA CH CL CN CO CR CU CZ DE DJ DK DM DO DZ EC EE EG ES FI GB GD GE GH GM GT HN HR HU ID IL IN IR IS JP KE KG KN KP KR KW…	Pharmaceuticals	(EP3364950)_x000D_ TROPICAL DISEASE VACCINE(100,1)_x000D_ (WO201770624)_x000D_ ANTIGENIC POLYPEPTIDE(100,250)_x000D_ VACCINE(100,219)_x000D_ DENGUE VIRUS(100,27)_x000D_ YELLOW FEVER VIRUS(100,8)_x000D_ CHIKUNGUNYA VIRUS(100,7)_x000D_ ZIKA VIRUS(100,7)_x000D_ JAPANESE ENCEPHALITIS VIRUS(100,6)_x000D_ WEST NILE VIRUS(100,6)_x000D_ SINDBIS VIRUS(100,5)_x000D_ TROPICAL DISEASE VACCINE(100,4)_x000D_ V…	(EP3364950)_x000D_ The disclosure relates to tropical diseases such as viral mosquito borne illnesses and the treatment thereof.The invention includes ribonucleic acid vaccines and combination vaccines, as well as methods of using the vaccines and compositions comprising the vaccines for treating and preventing tropical disease.	(WO201770624)_x000D_ Both the chemically modified and unmodified RNA vaccines of the invention produce better immune responses than mRNA vaccines formulated in a different lipid carrier._x000D_ In view of the lack of Dengue virus (DENV) vaccines, there is a significant need for a vaccine that would be safe and effective in all patient populations to prevent and/or to treat DENV infection, includi…	(WO201770624)_x000D_ CLAIMS 1. A tropical disease vaccine, comprising: at least one RNA polynucleotide having an open reading frame encoding at least one tropical disease antigenic polypeptide, formulated in a cationic lipid nanoparticle._x000D_ 3. A Malaria vaccine, comprising: at least one ribonucleic acid (RNA) polynucleotide having an open reading frame encoding at least one Plasmodium antige…	(WO201770624)_x000D_ Some embodiments of the present disclosure provide JEV vaccines that include at least one ribonucleic acid (RNA) polynucleotide having an open reading frame encoding at least one JEV antigenic polypeptide or an immunogenic fragment thereof (e.g., an_x000D_ Some embodiments of the present disclosure provide Malaria vaccines that include at least one ribonucleic acid (RNA) poly…	(WO201770624)_x000D_ International Search Report [Examiner]_x000D_ -POLLARD. C ET AL.: "Type I IFN counteracts the induction of antigen-specific immune responses by lipid-based delivery of mRNA vaccines''.", MOL THER., vol. 21, no. 1, 2013, pages 251 - 259, XP055378387CC=XP; XP055378387 (Cat. L)_x000D_ -IAN MACLACHLAN: "Lipid Nanoparticle-mediated delivery of messenger RNA", TEKMIRA, 24 October 2…
75963184	A61K-2039/505_x000D_ C07K-016/10_x000D_ Y02A-050/386_x000D_ Y02A-050/388_x000D_ Y02A-050/392	A61K-039/12_x000D_ A61P-031/14_x000D_ C07K-016/10_x000D_ C12N-015/13_x000D_ C12N-015/63	Pharmaceuticals	CN201611108858	2016CN-1108858	2016-12-06	2016	(CN106589116)_x000D_ Flavivirus human monoclonal antibody and application	WANG QIHUI_x000D_ YAN JINGHUA_x000D_ GAO FU	(CN106589116)_x000D_ 王奇慧_x000D_ 严景华_x000D_ 高福	(CN106589116)_x000D_ WANG QIHUI_x000D_ YAN JINGHUA_x000D_ GAO FU	INSTITUTE OF MICROBIOLOGY CHINESE ACADEMY OF SCIENCES	INSTITUTE OF MICROBIOLOGY CHINESE ACADEMY OF SCIENCES	INSTITUTE OF MICROBIOLOGY CHINESE ACADEMY OF SCIENCES	(CN106589116)_x000D_ 中国科学院微生物研究所			(CN106589116)_x000D_ INSTITUTE OF MICROBIOLOGY CHINESE ACADEMY OF SCIENCES		CN	ACADEMY	CN					PENDING	PENDING	ALIVE	ALIVE		2036-12-06	Y02A-050/386	C07K-016/10	1	1	0	0	1		Pharmaceuticals	(CN106589116)_x000D_ ANTIGEN(100,25)_x000D_ PLASMID(100,10)_x000D_ HUMAN MONOCLONAL ANTIBODY(100,5)_x000D_ ANTIBODY FRAGMENT(100,4)_x000D_ APPLICATION FIAVIVIRUSE(100,2)_x000D_ HOST CELL(100,2)_x000D_ ENCODING FRAGMENT(100,1)_x000D_ ANTIBODY HEAVY CHAIN(89,7)_x000D_ ANTIBODY(75,53)_x000D_ CHIMERIC ANTIBODY(71,2)_x000D_ FLAVIVIRIDAE VIRUS DETECTION(69,1)_x000D_ AMINOACID RESIDUE(64,12)_x000D_ CLON…	(CN106589116)_x000D_ The invention discloses a flavivirus human monoclonal antibody and application, which belong to the technical field of medicine.According to the flavivirus human monoclonal antibody and the application provided by the invention, three antibodies capable of protein-binding with ZIKV-E are acquired, and binding sites of the three antibodies are confirmed.The three antibodies ar…	(CN106589116)_x000D_ Zika virus infection recent studies male mice can cause testicular damage, and ultimately lead to infertility.	(CN106589116)_x000D_ 1. An antibody or antigen-binding fragment thereof, characterized in, which comprises (A) or (B) or (C) or (D) : (A) an antibody heavy chain variable region comprising SEQ ID NO: 1 to 26-35 bits, 53-59 bits, and the/or 98-105 the amino acid residues, and the antibody light chain variable region comprising SEQ ID NO: 2 to 26-34 bits, 52-54 bit, and the/or 91-100 the amino acid…	(CN106589116)_x000D_ The present invention discloses a human monoclonal antibody and application fiaviviruses, belongs to the technical field of medicine._x000D_ The present invention relates to a human monoclonal antibody and uses yellow virus, which belongs to the technical field of medicine._x000D_ The present invention is a monoclonal antibody, or antigen-binding fragment of an amino acid seq…
76110402	A01N-025/04_x000D_ A01N-025/08_x000D_ A01N-025/22_x000D_ A01N-025/24_x000D_ A01N-031/06	A01N-025/04_x000D_ A01N-025/08_x000D_ A01N-025/18_x000D_ A01N-025/22_x000D_ A01N-025/24_x000D_ A01N-031/06_x000D_ A01P-017/00	Basic materials chemistry	GB201519781	2015GB-0019781	2015-11-10	2015	(US10064407)_x000D_ Insect repellent composition and method of use	Davies John Hywel_x000D_ Moses John		(US20170354141)_x000D_ DAVIES John Hywel_x000D_ MOSES John_x000D_ (US10064407)_x000D_ Davies John Hywel_x000D_ Moses John	NEO INNOVA HEALTHCARE	NEO INNOVA HEALTHCARE	NEO INNOVA HEALTHCARE		DAVIES JOHN HYWEL; FROM 2017-08-08 TO 2017-09-30_x000D_ MOSES JOHN; FROM 2017-08-08 TO 2017-10-02_x000D_ NEO INNOVA HEALTHCARE; FROM 2017-09-30	(US10064407)_x000D_ NEO INNOVA HEALTHCARE UNITED KINGDOM; EFFD=2017-10-13	(US20170354141)_x000D_ NEO-INNOVA HEALTHCARE LIMITED ([GB])_x000D_ (US10064407)_x000D_ Neo-Innova Healthcare Limited ([GB])_x000D_ (WO201781445)_x000D_ NEO-INNOVA HEALTHCARE LIMITED ([GB])_x000D_ (CA3004810)_x000D_ NEO-INNOVA HEALTHCARE LIMITED ([GB])_x000D_ HYWEL DAVIES, JOHN ([ZZ])_x000D_ MOSES, JOHN ([ZZ])_x000D_ (SG11201803947V)_x000D_ NEO-INNOVA HEALTHCARE LIMITED_x000D_ (AU2016352072)_x000D…	(US20170354141)_x000D_ NEO-INNOVA HEALTHCARE LIMITED_x000D_ (US10064407)_x000D_ Neo-Innova Healthcare Limited_x000D_ (WO201781445)_x000D_ NEO-INNOVA HEALTHCARE LIMITED_x000D_ (CA3004810)_x000D_ NEO-INNOVA HEALTHCARE LIMITED; HYWEL DAVIES, JOHN; MOSES, JOHN_x000D_ (SG11201803947V)_x000D_ NEO-INNOVA HEALTHCARE LIMITED	AU	CORPORATE	GB	(US20170354141)_x000D_ GB_x000D_ (US10064407)_x000D_ GB_x000D_ (WO201781445)_x000D_ GB_x000D_ (CA3004810)_x000D_ ZZ; GB_x000D_	(US20170354141)_x000D_ NAME=NEO-INNOVA HEALTHCARE LIMITED , CITY=Odiham , COUNTRY=GB _x000D_ _x000D_ (US10064407)_x000D_ NAME=Neo-Innova Healthcare Limited , CITY=Odiham , COUNTRY=GB , ATYP=Non-US Company _x000D_ _x000D_ (WO201781445)_x000D_ NAME=NEO-INNOVA HEALTHCARE LIMITED 57 Hight Street Odiham Hook Hampshire RG29 1LF , POSTCODE=RG29 1LF , COUNTRY=GB _x000D_ _x000D_ (CA3004810)_x000D_ NAME=NE…	(US20170354141)_x000D_ GB_x000D_ (US10064407)_x000D_ GB	(US20170354141)_x000D_ NAME=DAVIES John Hywel , CITY=Odiham , COUNTRY=GB _x000D_ _x000D_ NAME=MOSES John , CITY=Nottingham , COUNTRY=GB _x000D_ _x000D_ (US10064407)_x000D_ NAME=Davies John Hywel , CITY=Odiham , COUNTRY=GB _x000D_ _x000D_ NAME=Moses John , CITY=Nottingham , COUNTRY=GB _x000D_	GRANTED	(US20170354141)_x000D_ GRANTED_x000D_ (WO201781445)_x000D_ PENDING_x000D_ (CA3004810)_x000D_ PENDING_x000D_ (BR112018009513)_x000D_ PENDING_x000D_ (SG11201803947V)_x000D_ PENDING_x000D_ (AU2016352072)_x000D_ GRANTED	ALIVE	(US20170354141)_x000D_ ALIVE_x000D_ (WO201781445)_x000D_ ALIVE_x000D_ (CA3004810)_x000D_ ALIVE_x000D_ (BR112018009513)_x000D_ ALIVE_x000D_ (SG11201803947V)_x000D_ ALIVE_x000D_ (AU2016352072)_x000D_ ALIVE	(US10064407)_x000D_ 2018-09-04_x000D_ (AU2016352072)_x000D_ 2018-08-16	(US20170354141)_x000D_ 2037-08-08_x000D_ (WO201781445)_x000D_ 2019-05-10_x000D_ (CA3004810)_x000D_ 2036-11-04_x000D_ (BR112018009513)_x000D_ 2036-11-04_x000D_ (SG11201803947V)_x000D_ 2036-11-04_x000D_ (AU2016352072)_x000D_ 2036-11-04	A01N-025/24	A01N-025/24	6	0	2	10	6	(WO201781445)_x000D_ National States: AE AG AL AM AO AT AU AZ BA BB BG BH BN BR BW BY BZ CA CH CL CN CO CR CU CZ DE DJ DK DM DO DZ EC EE EG ES FI GB GD GE GH GM GT HN HR HU ID IL IN IR IS JP KE KG KN KP KR KW KZ LA LC LK LR LS LU LY MA MD ME MG MK MN MW MX MY MZ NA NG NI NO NZ OM PA PE PG PH PL PT QA RO RS RU RW SA SC SD SE SG SK SL SM ST SV SY TH TJ TM TN TR TT TZ UA UG US UZ VC VN ZA ZM ZW_x000…	Basic materials chemistry	(EP3370521)_x000D_ INSECT REPELLENT(100,1)_x000D_ (US20170354141)_x000D_ INSECT REPELLENT(100,90)_x000D_ SCOTTISH HIGHLAND MIDGE(90,6)_x000D_ VANILLIN RATHER OVERWHELMING SMELL(57,1)_x000D_ ZIKA VIRUS(56,8)_x000D_ INDIAN SUBCONTINENT(56,1)_x000D_ FINISHED FORMULATION SMELL(53,1)_x000D_ DELIVERY VEHICLE(47,16)_x000D_ CHILD KILLER(47,1)_x000D_ DISEASE OUTBREAK(45,1)_x000D_ SOLE INSECT REPELLENT(44,…	(US10064407)_x000D_ The present invention is concerned with an insect repellent composition and a method of using the same to repel insects over an extended period of time.The compositions of the invention include natural insect repellents and can provide a prolongation of complete protection times to a 12 hour minimum thereby enabling a once daily dosage regime if required.	(US20170354141)_x000D_ The present invention thus clearly provides advantages compared to the prior art._x000D_ [0021] However, of greater general health importance in terms of clinical mortality, certain mosquito species are well known vectors of serious diseases including the greatest "biters"/killers of children (malaria) and recent years have seen major increases in mortality associated with …	(US20170354141)_x000D_ 2. An insect repellent composition comprising p-methane-3,8-diol as the sole insect repellent, vanillin and a delivery vehicle._x000D_ 3. An insect repellent composition comprising p-methane-3,8-diol, vanillin and a delivery vehicle, wherein said insect repellent composition provides a complete protection time of at least 8 hours.	(US20170354141)_x000D_ Furthermore, the present inventors have found that the natural oil PMD can achieve the minimum CPT target for 12 hours._x000D_ The present invention is concerned with an insect repellent composition and a method of using the same to repel insects over an extended period of time._x000D_ [0018] The present invention is concerned with an insect repellent composition and a meth…	(US10064407)_x000D_ Applicant references_x000D_ -Foreign Communication from a related application—International Search Report and Written Opinion of the International Searching Authority, Application No. PCT/GB2016/053430, dated Jan. 25, 2017, 10 pages._x000D_ -Amer, Abdelkrim, et al., “Repellecy effect of forty-one essential oils against Aedes, Anopheles and Culex mosquitoes,” Parasitol Res, 200…
76111920	B01F-007/00/133_x000D_ B01F-007/00/141_x000D_ B01F-007/18_x000D_ B01F-013/10/22_x000D_ B01F-015/00/454_x000D_ B01F-2015/00623_x000D_ B01F-2215/0481_x000D_ C12M-023/12_x000D_ C12M-027/02_x000D_ C12M-041/36_x000D_ C12M-041/48	B01F-007/18_x000D_ C12M-001/00_x000D_ C12M-001/12_x000D_ C12M-001/32_x000D_ C12M-001/33_x000D_ C12N-005/071_x000D_ C12N-005/073	Biotechnology_x000D_ Chemical engineering	US62/254,943P	2015US-62254943	2015-11-13	2015	(WO201783705)_x000D_ Cell culture system and method of use thereof	SONG HONGJUN_x000D_ MING GUOLI_x000D_ SONG MINGXI MAX_x000D_ HADIONO CHRISTOPHER_x000D_ JEANG WILLIAM_x000D_ NGUYEN HA NAM_x000D_ QIAN XUYU		(WO201783705)_x000D_ SONG, Hongjun_x000D_ MING, Guoli_x000D_ SONG, Mingxi, Max_x000D_ HADIONO, Christopher_x000D_ JEANG, William_x000D_ NGUYEN, Ha, Nam_x000D_ QIAN, Xuyu	JOHNS HOPKINS UNIVERSITY	JOHNS HOPKINS UNIVERSITY	JOHNS HOPKINS UNIVERSITY				(WO201783705)_x000D_ THE JOHNS HOPKINS UNIVERSITY ([US])	(WO201783705)_x000D_ THE JOHNS HOPKINS UNIVERSITY	US	ACADEMY	US	(WO201783705)_x000D_ US	(WO201783705)_x000D_ NAME=THE JOHNS HOPKINS UNIVERSITY 3400 N. Charles Street Baltimore, MD 21218 , POSTCODE=21218 , COUNTRY=US _x000D_	(WO201783705)_x000D_ US	(WO201783705)_x000D_ NAME=SONG, Hongjun 5713 Whistling Winds Walk Clarksville, MD 21029 , POSTCODE=21029 , COUNTRY=US _x000D_ _x000D_ NAME=MING, Guoli 5713 Whistling Winds Walk Clarksville, MD 21029 , POSTCODE=21029 , COUNTRY=US _x000D_ _x000D_ NAME=SONG, Mingxi, Max 5713 Whistling Winds Walk Clarksville, MD 21029 , POSTCODE=21029 , COUNTRY=US _x000D_ _x000D_ NAME=HADIONO, Christopher Address: 1 …	PENDING	PENDING	ALIVE	ALIVE		2019-05-13	B01F-007/18	B01F-007/18	1	0	6	0	1	(WO201783705)_x000D_ National States: AE AG AL AM AO AT AU AZ BA BB BG BH BN BR BW BY BZ CA CH CL CN CO CR CU CZ DE DJ DK DM DO DZ EC EE EG ES FI GB GD GE GH GM GT HN HR HU ID IL IN IR IS JP KE KG KN KP KR KW KZ LA LC LK LR LS LU LY MA MD ME MG MK MN MW MX MY MZ NA NG NI NO NZ OM PA PE PG PH PL PT QA RO RS RU RW SA SC SD SE SG SK SL SM ST SV SY TH TJ TM TN TR TT TZ UA UG US UZ VC VN ZA ZM ZW_x000…	Biotechnology_x000D_ Chemical engineering	(WO201783705)_x000D_ A CELL CULTURE(100,15)_x000D_ RESEMBLING MICROCEPHALY(100,2)_x000D_ MEANINGFUL BIOMEDICAL RESEARCH(92,1)_x000D_ MULTIWELL CULTURE PLATE(90,5)_x000D_ CELL DIFFERENTIATION(84,3)_x000D_ CULTURE MEDIA(81,24)_x000D_ PLATFORM ADVANCEMENT(80,1)_x000D_ VIRUS INFECTION(80,1)_x000D_ CULTURE(79,35)_x000D_ ZIKA VIRUS(75,5)_x000D_ LIVING TISSUE(75,1)_x000D_ REPRESENTATIVE CELLULAR ENVIRON…	(WO201783705)_x000D_ The present invention is based in part on the discovery of significant improvements to cell culture systems and methods of generating organoids.The system of the invention provides a novel spinning bioreactor platform for higher-throughput 3D culturing of stem cells (e.g. human induced pluripotent stem cells (iPSCs) or embryonic stem cells (ESCs)).The system can be widely use…	(WO201783705)_x000D_ The circular flow provides better mixing of oxygen from the air into culture media and facilitates diffusion of oxygen and nutrients into cultured tissues._x000D_ Therefore, there is a need for 'bridging the gap' between in-vivo and in-vitro studies through a more representative cellular environment, such as utilization of organoid structures that mimic living tissue._x000D_ …	(WO201783705)_x000D_ 1. A cell culture system, comprising a) a multiwell culture plate, the plate comprising: i) a base substrate having a plurality of culture wells; and ii) a shaft operably associated with each culture well, each shaft being configured to mix media present in each culture well and having a gear adapted to operably associate with a gear on a shaft associated with an adjacent cul…	(WO201783705)_x000D_ [0004] The present invention relates generally to cell culture, and more particularly to a cell culture system for three dimensional cell culture, and methods of use thereof._x000D_ [0010] In one aspect, the invention provides a cell culture system._x000D_ [0011] In another aspect, the invention provides a method of cell culture.	(WO201783705)_x000D_ International Search Report [Examiner]_x000D_ -DANJO ET AL.: "Subregional Specification of Embryonic Stem Cell -Derived Ventral Telencephalic Tissues by Timed and Combinatory Treatment with Extrinsic Signals", THE JOURNAL OF NEUROSCIENCE, vol. 31, no. 5, 2 February 2011 (2011-02-02), pages 1919 - 1933, XP055372621CC=XP; XP055372621 (Cat. Y)_x000D_ -GARCEZ ET AL.: "Zika Virus …
76112320	C07K-014/195_x000D_ C07K-014/285_x000D_ C07K-014/315_x000D_ C07K-014/435/54_x000D_ C07K-014/44_x000D_ C07K-014/45_x000D_ G01N-033/68/42	A61K-038/02_x000D_ A61K-039/00_x000D_ A61K-039/02_x000D_ A61K-039/09_x000D_ C07K-014/195_x000D_ C07K-014/315	Pharmaceuticals	US62/253,926P	2015US-62253926	2015-11-11	2015	(WO201783874)_x000D_ Methods and compositions for assessing antibody specificities	DAUGHERTY PATRICK_x000D_ KAMATH KATHY_x000D_ REIFERT JACK		(WO201783874)_x000D_ DAUGHERTY, Patrick_x000D_ KAMATH, Kathy_x000D_ REIFERT, Jack	SERIMMUNE	SERIMMUNE	SERIMMUNE				(WO201783874)_x000D_ SERIMMUNE INC. ([US])_x000D_ (CA3005070)_x000D_ SERIMMUNE INC. ([US])_x000D_ DAUGHERTY, PATRICK ([ZZ])_x000D_ KAMATH, KATHY ([ZZ])_x000D_ REIFERT, JACK ([ZZ])_x000D_ (AU2016353453)_x000D_ Serimmune Inc.	(WO201783874)_x000D_ SERIMMUNE INC._x000D_ (CA3005070)_x000D_ DAUGHERTY, PATRICK; REIFERT, JACK; SERIMMUNE INC.; KAMATH, KATHY	AU	CORPORATE	US	(WO201783874)_x000D_ US_x000D_ (CA3005070)_x000D_ ZZ; US	(WO201783874)_x000D_ NAME=SERIMMUNE INC. 917 N. Patterson Avenue Santa Barbara, California 93111 , POSTCODE=93111 , COUNTRY=US _x000D_ _x000D_ (CA3005070)_x000D_ NAME=SERIMMUNE INC. 917 N PATTERSON AVENUE , CITY=SANTA BARBARA , STATE=CA , POSTCODE=93111 , COUNTRY=US _x000D_ _x000D_ NAME=SERIMMUNE INC. 917 N PATTERSON AVENUE , CITY=SANTA BARBARA , STATE=CA , POSTCODE=93111 , COUNTRY=US _x000D_ _x0…	(WO201783874)_x000D_ US	(WO201783874)_x000D_ NAME=DAUGHERTY, Patrick 917 N. Patterson Avenue Santa Barbara, California 93111 , POSTCODE=93111 , COUNTRY=US _x000D_ _x000D_ NAME=KAMATH, Kathy 3230 Braemar Santa Barbara, California 93109 , POSTCODE=93109 , COUNTRY=US _x000D_ _x000D_ NAME=REIFERT, Jack 2528 Orella Street Unit B Santa Barbara, California 93105 , POSTCODE=93105 , COUNTRY=US _x000D_	PENDING	(WO201783874)_x000D_ PENDING_x000D_ (CA3005070)_x000D_ PENDING_x000D_ (AU2016353453)_x000D_ PENDING	ALIVE	(WO201783874)_x000D_ ALIVE_x000D_ (CA3005070)_x000D_ ALIVE_x000D_ (AU2016353453)_x000D_ ALIVE		(WO201783874)_x000D_ 2019-11-20_x000D_ (CA3005070)_x000D_ 2036-11-14_x000D_ (AU2016353453)_x000D_ 2036-11-14	C07K-014/45	C07K-014/195	3	0	3	0	3	(WO201783874)_x000D_ National States: AE AG AL AM AO AT AU AZ BA BB BG BH BN BR BW BY BZ CA CH CL CN CO CR CU CZ DE DJ DK DM DO DZ EC EE EG ES FI GB GD GE GH GM GT HN HR HU ID IL IN IR IS JP KE KG KN KP KR KW KZ LA LC LK LR LS LU LY MA MD ME MG MK MN MW MX MY MZ NA NG NI NO NZ OM PA PE PG PH PL PT QA RO RS RU RW SA SC SD SE SG SK SL SM ST SV SY TH TJ TM TN TR TT TZ UA UG US UZ VC VN ZA ZM ZW_x000…	Pharmaceuticals	(WO201783874)_x000D_ PEPTIDE MOTIF(100,46)_x000D_ PEPTIDE SEQUENCE MOTIF(61,2)_x000D_ BIOLOGICAL SAMPLE(50,26)_x000D_ ANTIBODY REPERTOIRE BIOLOGICAL SAMPLE(50,2)_x000D_ BORRELLIA BURDORFERI INFECTION(49,1)_x000D_ TRYPANSOMA CRUZI INFECTION(47,1)_x000D_ NUCLEIC ACID LIBRARY(39,2)_x000D_ SEQUENCE ENCODING(39,2)_x000D_ HAEMOPHILUS INFLUENZA INFECTION(38,2)_x000D_ ANTIBODY REACTIVITY(38,1)_x000D_ COM…	(WO201783874)_x000D_ The present invention provides compositions and methods that can be used to determine a peptide signature for an antibody repertoire in a sample comprising multiple antibodies.The method can be used to characterize a phenotype in a sample, such as providing a diagnosis, prognosis or theranosis of a medical condition.	(WO201783874)_x000D_ Thus there is an unmet need for diagnostic technologies that can identify and present only those antigen components that are most specifically recognized by the immune response in individuals with a given phenotype._x000D_ Thus, there is a need for low cost multiplexed test that can diagnosis any or all of the tick-borne infections._x000D_ Thus, there is a need for methods an…	(WO201783874)_x000D_ A method of characterizing a phenotype in a biological sample comprising: a) identifying at least one peptide motif in the biological sample comprising: i) providing a biological sample comprising a plurality of antibodies; ii) contacting the biological sample with a plurality of peptides; and iii) identifying members of the plurality of peptides that form a complex with memb…	(WO201783874)_x000D_ Appropriate display systems are available in the art or are provided herein._x000D_ The present invention provides solution to this problem._x000D_ [0001] In various embodiments, the invention relates to compositions and methods for diagnosing disease by detecting antibodies in a sample.	(WO201783874)_x000D_ International Search Report [Examiner]_x000D_ -CIMA-CABAL ET AL.: "Immunodetection of pneumolysin in human urine by ELISA", JOURNAL OF MICROBIOLOGICAL METHODS, vol. 54, no. 1, 27 February 2003 (2003-02-27), pages 47 - 55, XP055381478CC=XP; XP055381478 (Cat. A)_x000D_ -ZHANG ET AL.: "A method for de novo nucleic acid diagnostic target discovery", BIOINFORMATICS, vol. 30, no. 2…
76125238	A01N-025/26_x000D_ A01N-059/16_x000D_ A01N-065/44	A01N-025/02_x000D_ A01N-025/08_x000D_ A01N-025/26_x000D_ A01N-059/16_x000D_ A01N-065/44_x000D_ A61K-008/29_x000D_ A61K-033/24_x000D_ A61K-047/06	Basic materials chemistry_x000D_ Organic fine chemistry	US62/256,534P	2015US-62256534	2015-11-17	2015	(US20170135349)_x000D_ Composition with pest resistant properties	MCALLISTER KEVIN		(US20170135349)_x000D_ McAllister Kevin	VECTORBLOCK	VECTORBLOCK	VECTORBLOCK				(US20170135349)_x000D_ VectorBlock LLC ([US])_x000D_ (WO201787654)_x000D_ VECTORBLOCK LLC ([US])_x000D_ (CA3005875)_x000D_ VECTORBLOCK LLC ([US])_x000D_ MCALLISTER, KEVIN ([ZZ])	(US20170135349)_x000D_ VectorBlock LLC_x000D_ (WO201787654)_x000D_ VECTORBLOCK LLC_x000D_ (CA3005875)_x000D_ MCALLISTER, KEVIN; VECTORBLOCK LLC	US	CORPORATE	US	(US20170135349)_x000D_ US_x000D_ (WO201787654)_x000D_ US_x000D_ (CA3005875)_x000D_ ZZ; US	(US20170135349)_x000D_ NAME=VectorBlock LLC , CITY=New York , STATE=NY , COUNTRY=US _x000D_ _x000D_ (WO201787654)_x000D_ NAME=VECTORBLOCK LLC 235 East 95th Street, Apt. 5K New York, NY 10128 , POSTCODE=10128 , COUNTRY=US _x000D_ _x000D_ (CA3005875)_x000D_ NAME=VECTORBLOCK LLC 235 East 95th Street, Apt. 5K , CITY=NEW YORK , STATE=NY , POSTCODE=10128 , COUNTRY=US _x000D_ _x000D_ NAME=VECTORBLOCK LL…	(US20170135349)_x000D_ US	(US20170135349)_x000D_ NAME=McAllister Kevin , CITY=New York , STATE=NY , COUNTRY=US _x000D_	PENDING	(US20170135349)_x000D_ PENDING_x000D_ (WO201787654)_x000D_ PENDING_x000D_ (CA3005875)_x000D_ PENDING_x000D_ (BR112018009994)_x000D_ PENDING	ALIVE	(US20170135349)_x000D_ ALIVE_x000D_ (WO201787654)_x000D_ ALIVE_x000D_ (CA3005875)_x000D_ ALIVE_x000D_ (BR112018009994)_x000D_ ALIVE		(US20170135349)_x000D_ 2036-06-10_x000D_ (WO201787654)_x000D_ 2019-12-10_x000D_ (CA3005875)_x000D_ 2036-11-17_x000D_ (BR112018009994)_x000D_ 2036-11-17	A01N-059/16	A01N-025/02	4	0	7	6	4	(WO201787654)_x000D_ National States: AE AG AL AM AO AT AU AZ BA BB BG BH BN BR BW BY BZ CA CH CL CN CO CR CU CZ DE DJ DK DM DO DZ EC EE EG ES FI GB GD GE GH GM GT HN HR HU ID IL IN IR IS JP KE KG KN KP KR KW KZ LA LC LK LR LS LU LY MA MD ME MG MK MN MW MX MY MZ NA NG NI NO NZ OM PA PE PG PH PL PT QA RO RS RU RW SA SC SD SE SG SK SL SM ST SV SY TH TJ TM TN TR TT TZ UA UG US UZ VC VN ZA ZM ZW_x000…	Basic materials chemistry_x000D_ Organic fine chemistry	(US20170135349)_x000D_ MOSQUITO(100,105)_x000D_ HOST(100,37)_x000D_ INFECTION(100,24)_x000D_ MOSQUITO BORNE DISEASE(100,15)_x000D_ BLOOD EXTRACTION(100,11)_x000D_ EXTRACTED BLOOD(100,11)_x000D_ TOPICAL ADMINISTRATION(100,3)_x000D_ HOST DERMIS(90,4)_x000D_ DANGEROUS REPUTATION(82,1)_x000D_ MOSQUITO FEEDING(64,1)_x000D_ MOSQUITO GROWING PRESENCE(61,1)_x000D_ TITANIUM OXIDE(42,4)_x000D_ ORGANIC COMP…	(US20170135349)_x000D_ A composition for topical administration containing particles and a pharmaceutically acceptable carrier.The particles may be composed of a metal oxide such as titanium oxide or zinc oxide, and may be coated with an external coating.The composition may also contain one or more organic components that are either bound or unbound to the particles.The composition may be used to…	(US20170135349)_x000D_ [0009] Thus, there is a need for a more effective and safe solution to combat the growing presence of mosquitoes and the diseases they carry._x000D_ Add to that the number of those sickened and killed by other mosquito-borne diseases such as dengue fever, yellow fever, and West Nile virus, and it is easy to see how they earned their dangerous reputation._x000D_ Additionally…	(US20170135349)_x000D_ 1. A composition for topical administration comprising particles and a pharmaceutically acceptable carrier, wherein the particles comprise a metal oxide._x000D_ 17. A method of preventing mosquitoes from extracting blood from a host or from infecting a host with a mosquito-borne disease or infection, said method comprising applying to the dermis of the host a composition co…	(US20170135349)_x000D_ [0010] An aspect of the invention relates to a composition comprising particles that interrupt feeding of the mosquito, and a pharmaceutically acceptable carrier._x000D_ [0017] Another aspect of the invention is a method of preventing mosquitoes from extracting blood from a host and/or from infecting a host with a mosquito-borne disease or infection, or a method of protecti…	(WO201787654)_x000D_ International Search Report [Examiner]_x000D_ -SUMAN, TY ET AL.: "Larvicidal activity of titanium dioxide nanoparticles synthesized using Morinda citrifolia root extract against Anopheles stephensi, Aedes aegypti and Culex quinquefasciatus and its other effect on non-target fish.", ASIAN PACIFIC JOUMAL OF TROPICAL DISEASE., vol. 5, no. 3, July 2014 (2014-07-01), pages 224 - 2…
76197304	A61K-038/00_x000D_ C07K-007/08_x000D_ C07K-014/36_x000D_ Y02A-050/385_x000D_ Y02A-050/391_x000D_ Y02A-050/395	A61K-038/04_x000D_ A61K-038/16_x000D_ C07K-007/08_x000D_ C07K-014/36	Pharmaceuticals	EP15195244	2015EP-0195244	2015-11-18	2015	(WO201785257)_x000D_ Labyrinthopeptins as anti-viral agents	BRÖNSTRUP MARK_x000D_ PROCHNOW HANS-PETER_x000D_ BIRUDUKOTA N V SURYANARAYANA_x000D_ SCHULZ THOMAS_x000D_ MESSERLE MARTIN_x000D_ PIETSCHMANN THOMAS_x000D_ HAID SIBYLLE_x000D_ BLOCKUS SEBASTIAN_x000D_ LAQMANI-GOFFINET CHRISTINE_x000D_ FRANZ SERGEJ_x000D_ BANDA DOMINIC HOWARD		(WO201785257)_x000D_ BRÖNSTRUP, Mark_x000D_ PROCHNOW, Hans-Peter_x000D_ BIRUDUKOTA, N.V. Suryanarayana_x000D_ SCHULZ, Thomas_x000D_ MESSERLE, Martin_x000D_ PIETSCHMANN, Thomas_x000D_ HAID, Sibylle_x000D_ BLOCKUS, Sebastian_x000D_ LAQMANI-GOFFINET, Christine_x000D_ FRANZ, Sergej_x000D_ BANDA, Dominic Howard	HELMHOLTZ ZENTRUM FUER INFEKTIONSFORSCHUNG_x000D_ MEDIZINISCHE HOCHSCHULE HANNOVER_x000D_ TWINCORE ZENTRUM FUR EXPERIMENTELLE & KLINISCHE INFEKTIONSFORSCHUNG_x000D_ TWINCORE ZENTRUM FÜR EXPERIMENTELLE & KLINISCHE INFEKTIONSFORSCHUNG	HELMHOLTZ ZENTRUM FUER INFEKTIONSFORSCHUNG_x000D_ MEDIZINISCHE HOCHSCHULE HANNOVER_x000D_ TWINCORE ZENTRUM FUR EXPERIMENTELLE & KLINISCHE INFEKTIONSFORSCHUNG_x000D_ TWINCORE ZENTRUM FÜR EXPERIMENTELLE & KLINISCHE INFEKTIONSFORSCHUNG	HELMHOLTZ ZENTRUM FUER INFEKTIONSFORSCHUNG_x000D_ MEDIZINISCHE HOCHSCHULE HANNOVER_x000D_ TWINCORE ZENTRUM FÜR EXPERIMENTELLE & KLINISCHE INFEKTIONSFORSCHUNG				(WO201785257)_x000D_ HELMHOLTZ-ZENTRUM FÜR INFEKTIONSFORSCHUNG GMBH ([DE])_x000D_ MEDIZINISCHE HOCHSCHULE HANNOVER ([DE])_x000D_ TWINCORE, ZENTRUM FÜR EXPERIMENTELLE UND KLINISCHE INFEKTIONSFORSCHUNG GMBH ([DE])_x000D_ (CA3004805)_x000D_ HELMHOLTZ-ZENTRUM FUR INFEKTIONSFORSCHUNG GMBH ([DE])_x000D_ MEDIZINISCHE HOCHSCHULE HANNOVER ([DE])_x000D_ TWINCORE, ZENTRUM FUR EXPERIMENTELLE UND KLINISCHE IN…	(WO201785257)_x000D_ MEDIZINISCHE HOCHSCHULE HANNOVER; TWINCORE, ZENTRUM FÜR EXPERIMENTELLE UND KLINISCHE INFEKTIONSFORSCHUNG GMBH; HELMHOLTZ-ZENTRUM FÜR INFEKTIONSFORSCHUNG GMBH_x000D_ (CA3004805)_x000D_ SCHULZ, THOMAS; HELMHOLTZ-ZENTRUM FUR INFEKTIONSFORSCHUNG GMBH; PROCHNOW, HANS-PETER; HAID, SIBYLLE; FRANZ, SERGEJ; BANDA, DOMINIC HOWARD; MESSERLE, MARTIN; BLOCKUS, SEBASTIAN; BIRUDUKOTA, N.V. …	CA	ACADEMY;ACADEMY	EP	(WO201785257)_x000D_ DE_x000D_ (CA3004805)_x000D_ ZZ; DE	(WO201785257)_x000D_ NAME=HELMHOLTZ-ZENTRUM FÜR INFEKTIONSFORSCHUNG GMBH Inhoffenstr. 7 38124 Braunschweig , POSTCODE=38124 , COUNTRY=DE _x000D_ _x000D_ NAME=MEDIZINISCHE HOCHSCHULE HANNOVER Carl-Neuberg-Str. 1 30625 Hannover , POSTCODE=30625 , COUNTRY=DE _x000D_ _x000D_ NAME=TWINCORE, ZENTRUM FÜR EXPERIMENTELLE UND KLINISCHE INFEKTIONSFORSCHUNG GMBH Feodor-Lynen-Str. 7 30625 Hannover , POSTCODE=…	(WO201785257)_x000D_ DE	(WO201785257)_x000D_ NAME=BRÖNSTRUP, Mark Roonstr. 7 38102 Braunschweig , POSTCODE=38102 , COUNTRY=DE _x000D_ _x000D_ NAME=PROCHNOW, Hans-Peter Rüninger Weg 7k 38124 Braunschweig , POSTCODE=38124 , COUNTRY=DE _x000D_ _x000D_ NAME=BIRUDUKOTA, N.V. Suryanarayana Neustadtring 32 38114 Braunschweig , POSTCODE=38114 , COUNTRY=DE _x000D_ _x000D_ NAME=SCHULZ, Thomas Ostfeldstr. 54 30559 Hannover , POSTC…	PENDING	(WO201785257)_x000D_ PENDING_x000D_ (CA3004805)_x000D_ PENDING	ALIVE	(WO201785257)_x000D_ ALIVE_x000D_ (CA3004805)_x000D_ ALIVE		(WO201785257)_x000D_ 2019-09-30_x000D_ (CA3004805)_x000D_ 2036-11-18	C07K-014/36	C07K-014/36	2	0	6	0	2	(WO201785257)_x000D_ National States: AE AG AL AM AO AT AU AZ BA BB BG BH BN BR BW BY BZ CA CH CL CN CO CR CU CZ DE DJ DK DM DO DZ EC EE EG ES FI GB GD GE GH GM GT HN HR HU ID IL IN IR IS JP KE KG KN KP KR KW KZ LA LC LK LR LS LU LY MA MD ME MG MK MN MW MX MY MZ NA NG NI NO NZ OM PA PE PG PH PL PT QA RO RS RU RW SA SC SD SE SG SK SL SM ST SV SY TH TJ TM TN TR TT TZ UA UG US UZ VC VN ZA ZM ZW_x000…	Pharmaceuticals	(WO201785257)_x000D_ LABYRINTHOPEPTIN DERIVATIVE(100,43)_x000D_ DENGUE VIRUS DENGUE FEVER(98,1)_x000D_ INFECTIOUS DISEASE PREVENTION(81,1)_x000D_ PEPTIDE(74,54)_x000D_ INFECTION(72,39)_x000D_ VIRUS(67,53)_x000D_ LABYRINTHOPEPTIN(65,91)_x000D_ INFECTIOUS DISEASE TREATMENT(62,1)_x000D_ MILLION DEATH(62,1)_x000D_ KSHV(57,60)_x000D_ INFECTIOUS DISEASE(57,10)_x000D_ ZIKA VIRUS(57,4)_x000D_ HUMAN RESPI…	(WO201785257)_x000D_ The present invention relates to novel labyrinthopeptin derivatives.These labyrinthopeptin derivatives are useful for the treatment of infectious diseases, such as an infectious disease caused by an infection with human respiratory syncytial virus (RSV), Kaposi sarcoma-associated herpesvirus (KSHV), cytomegalovirus (CMV/HCMV), dengue virus (DENV), chikungunya virus (CHIKV), t…	(WO201785257)_x000D_ Thus, there is a need for finding further anti-viral drugs, particularly for the treatment and/or prevention of infectious diseases arising from an infection with KSHV, C V, RSV, DENV, CHIKV, TBEV, VSV, ZI V and/or HCV. in addition, there is also a need for novel means and methods to unravel the mode of action of labyrinthopeptins._x000D_ The present invention solves the abov…	(WO201785257)_x000D_ 1. Peptide comprising or consisting of the amino acid sequence (SEQ ID NO: 1) wherein_x000D_ 7. Xi is an amino acid selected from Asn, Asp, and Glu;_x000D_ 8. Xa is an amino acid selected form Ala, Tip, and Sen X3 is an amino acid selected from Val, Leu, and lie; X4 is an amino acid selected from Trp and Tyr;_x000D_ 9. Xs is an amino acid selected from Glu and Asp;_x000D_ 10.…	(WO201785257)_x000D_ The present invention relates to novel labyrinthopeptin derivatives._x000D_ Accordingly, the present invention relates to a peptide (i.e. a labyrinthopeptin derivative) comprising or consisting of the amino acid sequence_x000D_ The invention further relates to a combination of labyrinthopeptin A1 and A2 for use as a medicament, e.g. for treating an infectious disease caused b…	(WO201785257)_x000D_ International Search Report [Examiner]_x000D_ -ALEN, M M F ET AL.: "52. Labyrinthopeptins, a new class of lantibiotics, exhibit potent antidengue virus activity", 16 April 2012 (2012-04-16), pages 52, XP002766870, Retrieved from the Internet <URL:http://c.ymcdn.com/sites/www.isar-icar.com/resource/resmgr/docs/final_program_2012.pdf> [retrieved on 20170207]CC=XP; XP002766870 (…
76213513	C12Q-001/68/51_x000D_ C12Q-001/70/1	C12N-015/11_x000D_ C12Q-001/68_x000D_ C12Q-001/70_x000D_ C12R-001/93	Biotechnology	CN201611266978	2016CN-1266978	2016-12-31	2016	(CN106702024)_x000D_ Kit for detecting Zika virus and application of kit	JIN YAMING_x000D_ LÜ ZHE_x000D_ HUI ZENGDI_x000D_ LI YURONG_x000D_ WANG LIN_x000D_ GAO QIANG_x000D_ YIN WEIDONG	(CN106702024)_x000D_ 金亚明_x000D_ 吕哲_x000D_ 惠增弟_x000D_ 李育蓉_x000D_ 王琳_x000D_ 高强_x000D_ 尹卫东	(CN106702024)_x000D_ JIN YAMING_x000D_ LÜ ZHE_x000D_ HUI ZENGDI_x000D_ LI YURONG_x000D_ WANG LIN_x000D_ GAO QIANG_x000D_ YIN WEIDONG	SINOVAC RESEARCH & DEVELOPMENT	SINOVAC RESEARCH & DEVELOPMENT	SINOVAC RESEARCH & DEVELOPMENT	(CN106702024)_x000D_ 北京科兴中维生物技术有限公司			(CN106702024)_x000D_ SINOVAC RESEARCH & DEVELOPMENT CO., LTD.		CN	CORPORATE	CN					PENDING	PENDING	ALIVE	ALIVE		2036-12-31	C12Q-001/70/1	C12Q-001/70	1	0	0	0	1		Biotechnology	(CN106702024)_x000D_ KIT(100,22)_x000D_ ZIKA VIRUS(100,20)_x000D_ PRIMER(100,18)_x000D_ PRIMER PAIR(100,11)_x000D_ FLUORESCENT PROBE(100,7)_x000D_ REALTIME PCR(100,5)_x000D_ GENETIC MARKER(100,4)_x000D_ BIOLOGICAL PRODUCT(100,3)_x000D_ TEMPLATE(100,3)_x000D_ BIOLOGICAL SAMPLE(100,2)_x000D_ DETECTION APPLICATION(100,2)_x000D_ SAMPLE BIOLOGICAL PRODUCT(100,2)_x000D_ VIRUS ZIKA(100,2)_x000D_ ZIKA VI…	(CN106702024)_x000D_ The invention provides a kit for detecting a Zika virus and application of the kit for detecting the Zika virus, and belongs to the technical field of PCR detection.According to the invention, firstly, a Zika virus genome NS4 gene sequence is compared, so that a Zika virus NS4 gene conservative area is determined, and a primer pair and a probe used for detecting the Zika viru…	(CN106702024)_x000D_ While the present invention describes an Zika virus genes conserved region design specific primers and probes, capable of detecting only the zika viral genomic nucleic acid, but it is not possible to detect the viral genomic nucleic acid non-card, illustrate the present kit will have good specificity._x000D_ Since Zika virus and Dengue, West Nile virus and yellow fever and th…	(CN106702024)_x000D_ 1. A method for detecting Zika virus genetic markers, as shown in SEQ ID NO. 4 or a sequence comprising a specific fragment._x000D_ 2. Claim 1 genetic markers for the manufacture of the kit Zika virus detection application._x000D_ 3. Zika virus-specific primer pairs for detecting, upstream or downstream thereof are set forth in SEQ ID NO.1,SEQ ID NO.2 primers having nucleotid…	(CN106702024)_x000D_ The present invention provides a kit and its use Zika virus detection, PCR detection belongs to the technical field._x000D_ The present invention relates to the technical field of detecting PCR, in particular for detecting Zika virus of the target sequence, a fluorescent quantitative PCR primers and probes, the present invention also relates to a method for using the target s…
76279435	C12Q-001/68/51_x000D_ C12Q-001/70/1_x000D_ Y02A-050/51_x000D_ Y02A-050/53	C12N-015/11_x000D_ C12Q-001/68_x000D_ C12Q-001/70_x000D_ C12R-001/93	Biotechnology	CN201611080920	2016CN-1080920	2016-11-30	2016	(CN106755571)_x000D_ Kit for detecting Zika virus, dengue virus and chikungunya virus	ZHANG YAN_x000D_ GAI WEI_x000D_ DAN WANSHUI_x000D_ XING WANLI_x000D_ SONG CUIDAN_x000D_ MA GUIHONG_x000D_ LIU HOUMING_x000D_ CHENG JING	(CN106755571)_x000D_ 张岩_x000D_ 盖伟_x000D_ 单万水_x000D_ 邢婉丽_x000D_ 宋翠丹_x000D_ 马桂红_x000D_ 刘厚明_x000D_ 程京	(CN106755571)_x000D_ ZHANG YAN_x000D_ GAI WEI_x000D_ DAN WANSHUI_x000D_ XING WANLI_x000D_ SONG CUIDAN_x000D_ MA GUIHONG_x000D_ LIU HOUMING_x000D_ CHENG JING	CAPITALBIO_x000D_ THIRD PEOPLE S HOSPITAL OF SHENZHEN	CAPITALBIO_x000D_ THIRD PEOPLE S HOSPITAL OF SHENZHEN	CAPITALBIO_x000D_ THIRD PEOPLE S HOSPITAL OF SHENZHEN	(CN106755571)_x000D_ 博奥生物集团有限公司_x000D_ 深圳市第三人民医院			(CN106755571)_x000D_ CAPITALBIO GROUP CO., LTD._x000D_ THE THIRD PEOPLE'S HOSPITAL OF SHENZHEN		CN	CORPORATE;ACADEMY	CN					PENDING	PENDING	ALIVE	ALIVE		2036-11-30	Y02A-050/51	C12Q-001/70	1	0	0	0	1		Biotechnology	(CN106755571)_x000D_ PRIMER(100,127)_x000D_ DENGUE VIRUS(100,51)_x000D_ ZIKA VIRUS(100,42)_x000D_ CHIKUNGUNYA VIRUS(100,33)_x000D_ KIT(100,23)_x000D_ DELETION(100,20)_x000D_ NUCLEOTIDE(100,20)_x000D_ SINGLE STRANDED DNA MOLECULE(100,20)_x000D_ DNA MOLECULE(100,18)_x000D_ PRIMER ZIKV R(100,13)_x000D_ PRIMER CHIKV R(100,12)_x000D_ PROBE ZIKV P(100,11)_x000D_ PROBE CHIKV P(100,10)_x000D_ DENV(100,9)…	(CN106755571)_x000D_ The invention discloses a kit for detecting Zika virus, dengue virus and chikungunya virus.The invention discloses a primer and probe combination, and the primer and probe combination includes a primer and probe group I, a primer and probe group II and a primer and probe group III; the primer and probe group I is composed of a primer ZIKV-F, a primer ZIKV-R and a probe ZIKV-P…	(CN106755571)_x000D_ The present invention provides a kit has the following advantages: (1) in the same reaction system can be detected Zika virus, dengue virus and Chikungunya virus has a good sensitivity ; (2) (Zika virus, dengue virus and Chikungunya fever virus can be detected 50 copies/reaction of the nucleic acid sample, Zika virus detection sensitivity even up to 20 copies/reaction) with g…	(CN106755571)_x000D_ 1. Primer probe combination, by the primer probe set I, II and Primer Probe Set III primer probe set up; Primer probe set I by the primers ZIKV-F, primer ZIKV-R and probe ZIKV-P composition; Primer ZIKV-F as follows (b1) or (b2); (B1) a single-stranded DNA molecule as shown in the Sequence Listing 1 sequence; (B2) will sequence through one or several nucleotides 1/or deletion…	(CN106755571)_x000D_ The present invention discloses a method for detecting Zika virus, dengue virus kit and a Chikungunya virus._x000D_ The present invention relates to a method for detecting Zika virus, dengue virus and Chikungunya virus of the kit._x000D_ An object of the present invention is to provide a means for detecting Zika virus, dengue virus and Chikungunya virus of the kit.
76286252	C12N-015/11_x000D_ C12Q-001/70/1	C12M-001/00_x000D_ C12N-015/11_x000D_ C12Q-001/68_x000D_ C12Q-001/70_x000D_ C12R-001/93	Biotechnology	CN201611092611	2016CN-1092611	2016-11-30	2016	(CN106754900)_x000D_ Nucleic acid encapsulating reagent and application thereof	ZHANG YAN_x000D_ GAI WEI_x000D_ XING WANLI_x000D_ SONG CUIDAN_x000D_ CHENG JING	(CN106754900)_x000D_ 张岩_x000D_ 盖伟_x000D_ 邢婉丽_x000D_ 宋翠丹_x000D_ 程京	(CN106754900)_x000D_ ZHANG YAN_x000D_ GAI WEI_x000D_ XING WANLI_x000D_ SONG CUIDAN_x000D_ CHENG JING	CAPITALBIO	CAPITALBIO	CAPITALBIO	(CN106754900)_x000D_ 博奥生物集团有限公司			(CN106754900)_x000D_ CAPITALBIO GROUP CO., LTD.		CN	CORPORATE	CN					PENDING	PENDING	ALIVE	ALIVE		2036-11-30	C12N-015/11	C12N-015/11	1	0	0	0	1		Biotechnology	(CN106754900)_x000D_ NUCLEIC ACID(100,33)_x000D_ PRIMER(100,31)_x000D_ ENCAPSULATION(100,22)_x000D_ DELETION(100,9)_x000D_ NUCLEOTIDE(100,9)_x000D_ SINGLE STRANDED DNA MOLECULE(100,9)_x000D_ PRIMER ZIKV R(100,7)_x000D_ PROBE ZIKV P(100,4)_x000D_ SEQUENCE DNA MOLECULE(100,4)_x000D_ DNA MOLECULE SEQUENCE(100,3)_x000D_ REAGENT(100,3)_x000D_ ACID SEQUENCE(100,2)_x000D_ SOLID SURFACE(100,2)_x000D_ NUC…	(CN106754900)_x000D_ The invention discloses a nucleic acid encapsulating reagent and an application thereof.The nucleic acid encapsulating reagent provided by the invention consists of 3-10 parts by mass of agarose, 1-5 parts by mass of saponin and 2-6 parts by mass of hydroxy propyl cellulose.The invention also discloses a target material detection device, wherein the target material detection …	(CN106754900)_x000D_ Zika virus infection virus isolation as the gold standard of diagnosis, but this method is time consuming and labor, and success rate is low._x000D_ The test virus to other 11 kinds of virus, does not exhibit an S-shaped positive amplification curve, as a negative result._x000D_ Nucleic acid sequence-dependent amplification techniques currently existing operation procedure is…	(CN106754900)_x000D_ 1. A nucleic acid as encapsulating agents, including 3-10 parts by mass of agarose, 1-5 parts by mass of saponins and 2-6 mass parts hydroxypropyl cellulose._x000D_ 4. Claim 1 to 3 any of nucleic acid encapsulated reagents for detecting, as the nucleic acid is embedded in a solid surface._x000D_ 9. One primer probe combination, the primer ZIKV-F, primer ZIKV-R and probe ZIKV-…	(CN106754900)_x000D_ The present invention discloses a method for encapsulating nucleic acid reagents and the use thereof._x000D_ The present invention provides nucleic acid encapsulated agents, including 3-10 parts by mass of agarose, 1-5 parts by weight of saponin and 2-6 mass parts hydroxypropyl cellulose._x000D_ An object of the present invention is to provide a nucleic acid as encapsulating …
76299368	C12Q-001/68/6_x000D_ C12Q-001/70/1_x000D_ C12Q-2600/16_x000D_ Y02A-050/51_x000D_ Y02A-050/53	C12N-015/11_x000D_ C12Q-001/68_x000D_ C12Q-001/70_x000D_ C12R-001/93	Biotechnology	CN201611116443	2016CN-1116443	2016-12-07	2016	(CN106755573)_x000D_ RT-PCR detection method, primer and probe as well as kit of Zika virus, dengue virus and chikungunya virus	ZHAI JIANXIN_x000D_ WU DE_x000D_ CENG HUASHU_x000D_ ZHANG LI_x000D_ WU XIAOWEI_x000D_ ZHONG WENYANG_x000D_ PAN YANPING	(CN106755573)_x000D_ 翟建新_x000D_ 吴德_x000D_ 曾华书_x000D_ 张利_x000D_ 吴晓卫_x000D_ 钟文杨_x000D_ 潘艳萍	(CN106755573)_x000D_ ZHAI JIANXIN_x000D_ WU DE_x000D_ ZENG HUASHU_x000D_ ZHANG LI_x000D_ WU XIAOWEI_x000D_ ZHONG WENYANG_x000D_ PAN YANPING	SHANGHAI AODONG INSPECTION & TESTING	SHANGHAI AODONG INSPECTION & TESTING	SHANGHAI AODONG INSPECTION & TESTING	(CN106755573)_x000D_ 深圳澳东检验检测科技有限公司			(CN106755573)_x000D_ SHENZHEN AODONG INSPECTION & TESTING TECHNOLOGY CO., LTD.		CN	CORPORATE	CN					PENDING	PENDING	ALIVE	ALIVE		2036-12-07	Y02A-050/51	C12Q-001/70	1	0	0	0	1		Biotechnology	(CN106755573)_x000D_ DENGUE VIRUS(100,36)_x000D_ ZIKA VIRUS(100,31)_x000D_ CHIKUNGUNYA FEVER VIRUS(100,22)_x000D_ KIT(100,20)_x000D_ PRIMER(100,20)_x000D_ PROBE(100,14)_x000D_ R T PCR(100,14)_x000D_ CHIKUNGUNYA FEVER(100,11)_x000D_ CHIKUNGUNYA FEVER VIRUS PRIMER(100,3)_x000D_ TRIPLE REALTIME R T PCR(100,3)_x000D_ DETECTION KIT(100,2)_x000D_ TRIPLE REALTIME R T PCR PRIMER(100,2)_x000D_ DENGUE VIRU…	(CN106755573)_x000D_ The invention relates to the technical field of molecular biological detection of an insect-borne infectious disease, and discloses a triple real-time fluorescence RT-PCR detection method, primer and probe as well as kit of Zika virus, dengue virus and chikungunya virus.The primer comprises the sequences of SEQ ID No.1, SEQ ID No.2, SEQ ID No.4, SEQ ID No.5, SEQ ID No.7 and S…	(CN106755573)_x000D_ An object of the present invention is to provide good specificity, sensitivity is high, can simultaneously detect Zika virus, Dengue virus, Chikungunya fever virus primers and probes._x000D_ The present invention has the following advantages:_x000D_ There are studies showing Zika virus disease may result in nerve and auto-immune system complications, such as Guillain-Barre sy…	(CN106755573)_x000D_ 1. A method for Zika virus, Dengue virus, Chikungunya fever virus of triple-real-time RT-PCR primers and probes detect, characterized in, including: Two detection Zika virus primer, SEQ ID No. 2 to SEQ ID No. 1 and the base sequence thereof respectively; A general-purpose Zika virus one of the sensing probe, the nucleotide sequence SEQ ID No. 3 as; Two detection of dengue vir…	(CN106755573)_x000D_ The present invention relates to the field of molecular biology techniques for detection of infectious diseases from insect-transmitted, discloses Zika virus, Dengue virus, Chikungunya virus of triple-real-time fluorescence thermal RT-PCR detection method, primers and probes and kits._x000D_ The present invention relates to the technical field of molecular biology of insect-t…
76311737	A61K-031/496_x000D_ Y02A-050/385_x000D_ Y02A-050/389_x000D_ Y02A-050/391_x000D_ Y02A-050/393	A61K-031/496_x000D_ A61P-031/14	Pharmaceuticals	CN201611231684	2016CN-1231684	2016-12-28	2016	(CN106727574)_x000D_ Application of Manidipine in preparing medicine for treating flaviviridae virus infection	WANG WEI_x000D_ WANG SHAOBO_x000D_ WANG PEILIN_x000D_ LIU YANG_x000D_ YIPENG,ZHU QI	(CN106727574)_x000D_ 王薇_x000D_ 汪少伯_x000D_ 王培林_x000D_ 刘洋_x000D_ 肖庚富	(CN106727574)_x000D_ WANG WEI_x000D_ WANG SHAOBO_x000D_ WANG PEILIN_x000D_ LIU YANG_x000D_ YIPENG,ZHU QI	WUHAN INSTITUTE OF VIROLOGY CHINESE ACADEMY OF SCIENCES	WUHAN INSTITUTE OF VIROLOGY CHINESE ACADEMY OF SCIENCES	WUHAN INSTITUTE OF VIROLOGY CHINESE ACADEMY OF SCIENCES	(CN106727574)_x000D_ 中国科学院武汉病毒研究所			(CN106727574)_x000D_ WUHAN INSTITUTE OF VIROLOGY, CHINESE ACADEMY OF SCIENCES		CN	ACADEMY	CN					PENDING	PENDING	ALIVE	ALIVE		2036-12-28	Y02A-050/385	A61K-031/496	1	0	0	0	1		Pharmaceuticals	(CN106727574)_x000D_ MEDICAMENT(100,13)_x000D_ DENGUE VIRUS INFECTION(100,6)_x000D_ SOIL TREATMENT(100,5)_x000D_ JAPANESE B ENCEPHALITIS VIRUS INFECTION(100,3)_x000D_ MEDICAMENT MANUFACTURE(100,3)_x000D_ NIFEDIPINE PREPARATION(100,3)_x000D_ PATIENT TREATMENT(100,3)_x000D_ WEST NILE VIRUS INFECTION(100,3)_x000D_ ZIKA VIRUS INFECTION(100,3)_x000D_ APPLICATION SQUARE(100,2)_x000D_ FLAVIVIRIDAE INFEC…	(CN106727574)_x000D_ The invention provides new application of Manidipine in the technical field of medicine, particularly discloses application of the Manidipine in preparing medicine for treating flaviviridae virus infection, particularly discloses application of the Manidipine in preparing medicine for treating flavivirus virus infection, and more particularly discloses application of the Mani…	(CN106727574)_x000D_ The present invention has the advantages of it can be concluded from the above conclusion: mani ground in addition to the effect of lowering blood pressure, also has anti-Flaviviridae the effects of infection; in particular, the treatment of patients infected with flaviviruses mani to the square of a medicament; more specifically, Japanese B encephalitis virus infection mani …	(CN106727574)_x000D_ 1. The treatment of Flaviviridae virus infection in the preparation of nifedipine mani of a medicament for application._x000D_ 2. Manidipine the treatment of patients infected with flaviviruses of a medicament._x000D_ 3. Manidipine medicament for the treatment of a medicament for application Japanese B encephalitis virus infection._x000D_ 4. Zika virus infection mani of a med…	(CN106727574)_x000D_ The present invention provides a new use in the pharmaceutical art mani nifedipine, in particular for the treatment of Flaviviridae infections mani ground of a medicament for the application; in particular, for the treatment of flavivirus virus infection mani to the square of a medicament; more specifically, mani for the treatment of viral infection drug nifedipine Japanese B…
76370498	A61K-038/46/5_x000D_ C12N-009/22_x000D_ C12Y-301/27_x000D_ C12Y-301/27005	A61K-038/46	Pharmaceuticals	US14/229,816	2014US-14229816	2014-03-28	2014	(US20170157219)_x000D_ Methods of treating zika virus, mers-cov, chikungunya, venezuelan equine encephalitus, and rhinovirus in mammalian patients	HODGE III THOMAS W		(US20170157219)_x000D_ Hodge, III Thomas W.	TAMIR BIOTECHNOLOGY	TAMIR BIOTECHNOLOGY	TAMIR BIOTECHNOLOGY		HODGE THOMAS W III; FROM 2017-02-09 TO 2017-02-15_x000D_ TAMIR BIOTECHNOLOGY; FROM 2017-02-15	(US20170157219)_x000D_ TAMIR BIOTECHNOLOGY; EFFD=2017-02-15	(US20170157219)_x000D_ Tamir Biotechnology, Inc. ([US])	(US20170157219)_x000D_ Tamir Biotechnology, Inc.	US	CORPORATE	US	(US20170157219)_x000D_ US	(US20170157219)_x000D_ NAME=Tamir Biotechnology, Inc. , CITY=San Diego , STATE=CA , COUNTRY=US , ATYP=US Company _x000D_	(US20170157219)_x000D_ US	(US20170157219)_x000D_ NAME=Hodge, III Thomas W. , CITY=Athens , STATE=GA , COUNTRY=US _x000D_	LAPSED	LAPSED	DEAD	DEAD		2018-07-17	A61K-038/46/5	A61K-038/46	1	0	1	0	1		Pharmaceuticals	(US20170157219)_x000D_ PATIENT(100,50)_x000D_ VIRUS(100,42)_x000D_ MAMMALIAN PATIENT(100,26)_x000D_ VIRAL INFECTION(100,17)_x000D_ INFECTION(100,15)_x000D_ ZIKA VIRUS(100,12)_x000D_ MERS COV(100,11)_x000D_ RHINOVIRUS FAMILY(100,8)_x000D_ BALTIMORE CLASSIFICATION(100,7)_x000D_ CHIKUNGUNYA(100,5)_x000D_ DENGUE FEVER(100,5)_x000D_ FLAVIVIRIDAE FAMILY(100,5)_x000D_ MERS COV INFECTION(100,5)_x000D_ VE…	(US20170157219)_x000D_ Viral infections in mammals can be treated and prophylactically prevented by systemic administration of ranpirnase and three other ribonucleases that are highly homologous with it and that have activities that are highly similar to it.Experimental results against Zika virus, Middle East Respiratory Syndrome Coronavirus (“MERS-CoV”), Chikungunya virus, Venezuelan equine ence…	(US20170157219)_x000D_ [0010] Hence, it appears that the RNA-degrading characteristics of ranpirnase make it possible to use ranpirnase as a pharmaceutical for treating a wide variety of viral infections in mammals by administering ranpirnase systemically._x000D_ [0002] Ranpirnase has previously demonstrated activity against a large number of viral infections, some of which are members of the Fla…	(US20170157219)_x000D_ 1. A method of treating a viral infection in a mammalian patient, the viral infection being other than Dengue fever, yellow fever, and severe acute respiratory syndrome and being classified in Baltimore Classification Group IV, comprising systemically administering a therapeutically effective dose of ranpirnase to the patient._x000D_ 2. A method of treating a viral infectio…	(US20170157219)_x000D_ Experimental results against Zika virus, Middle East Respiratory Syndrome Coronavirus ("MERS-CoV"), Chikungunya virus, Venezuelan equine encephalitis, and rhinovirus-14 are disclosed._x000D_ [0001] The invention relates to treatment of infections caused by viruses (other than Dengue fever and yellow fever) classified in Baltimore Group IV, and more particularly relates to t…
76447687	G01N-033/531_x000D_ G01N-033/558_x000D_ G01N-033/569/83_x000D_ G01N-033/577_x000D_ G01N-2333/183_x000D_ G01N-2333/46_x000D_ G01N-2800/26_x000D_ Y02A-050/53	G01N-033/531_x000D_ G01N-033/558_x000D_ G01N-033/569_x000D_ G01N-033/577	Analysis of biological materials	CN201611272846	2016CN-1272846	2016-12-30	2016	(CN106841601)_x000D_ Preparation of Zika virus multi-segment fusion protein and IgG/IgM antibody detection kit	WU YINGSONG_x000D_ DENG CHUANHUAN_x000D_ DONG ZHINING_x000D_ LI ZHIXIONG	(CN106841601)_x000D_ 吴英松_x000D_ 邓传欢_x000D_ 董志宁_x000D_ 李志雄	(CN106841601)_x000D_ WU YINGSONG_x000D_ DENG CHUANHUAN_x000D_ DONG ZHINING_x000D_ LI ZHIXIONG	GUANGZHOU DARUI BIOTECHNOLOGY	GUANGZHOU DARUI BIOTECHNOLOGY	GUANGZHOU DARUI BIOTECHNOLOGY	(CN106841601)_x000D_ 广州市达瑞生物技术股份有限公司			(CN106841601)_x000D_ GUANGZHOU DARUI BIOTECHNOLOGY CO., LTD.		CN	CORPORATE	CN					PENDING	PENDING	ALIVE	ALIVE		2036-12-30	Y02A-050/53	G01N-033/558	1	0	4	0	1		Analysis of biological materials	(CN106841601)_x000D_ ZIKA VIRUS(100,23)_x000D_ KIT(100,13)_x000D_ FUSION PROTEIN(100,9)_x000D_ PURIFICATION(100,6)_x000D_ DENGUE VIRUS(100,5)_x000D_ DIAGNOSTIC ANTIGEN(100,5)_x000D_ LINEAR EPITOPE(100,4)_x000D_ IGG(100,3)_x000D_ BIOINFORMATICS ANALYSIS(100,2)_x000D_ IGM ANTIBODY ASSAY KIT(100,2)_x000D_ ANTIBODY ASSAY KIT(100,1)_x000D_ COLLOIDAL GOLD LABEL(100,1)_x000D_ GENE SEQUENCE COMPARISON(10…	(CN106841601)_x000D_ The invention aims at providing a simple and quick Zika virus detection kit.The kit optimally selects fusion expression protein as diagnostic antigen; an anti-human IgG monoclonal antibody A374, an anti-human IgM monoclonal antibody A371 and a biotin-BSA conjugate are respectively coated on a nitrocellulose membrane as a detection line and a quality control line; colloidal go…	(CN106841601)_x000D_ Zika virus may cause neural and auto-immune system complications, such as Guillain-Barre syndrome (Guillian-Barr syndrome), Zika virus infected pregnant woman may cause the infant's microcephaly._x000D_ If the pH value is lower than the isoelectric point of the protein of colloidal gold, there is a loss of ability to bind to the aggregation.	(CN106841601)_x000D_ 1. One fragment fusion proteins were prepared and a plurality Zika virus antibody assay kit IgG/IgM, characterized in bioinformatics analysis techniques applied to a dengue virus gene sequence comparison Zika virus, characteristic of linear epitopes polytppe selected Zika virus fusion expression and purification, a recombinant protein and preferably ZIKV-Ag2 as a diagnostic a…	(CN106841601)_x000D_ The present invention aims to provide a simple and rapid Zika virus detection kit._x000D_ The present invention aims to provide a simple and rapid Zika virus detection kit (colloidal gold).
76454710	A61K-031/7024_x000D_ Y02A-050/391	A61K-031/7024_x000D_ A61P-031/14	Pharmaceuticals	CN201710188737	2017CN-0188737	2017-03-27	2017	(CN106822156)_x000D_ Application of tannin to resistance on infection of flaviviruses such as Zika virus	YANG HAITAO_x000D_ HU CAN_x000D_ WANG ZEFANG_x000D_ CHEN CHENG_x000D_ CAI YAN_x000D_ LI SHUANG_x000D_ FU SHENG_x000D_ ZHOU KAIXUAN	(CN106822156)_x000D_ 杨海涛_x000D_ 胡灿_x000D_ 王泽方_x000D_ 陈成_x000D_ 蔡岩_x000D_ 李爽_x000D_ 傅晟_x000D_ 周凱旋	(CN106822156)_x000D_ YANG HAITAO_x000D_ HU CAN_x000D_ WANG ZEFANG_x000D_ CHEN CHENG_x000D_ CAI YAN_x000D_ LI SHUANG_x000D_ FU SHENG_x000D_ ZHOU KAIXUAN	TIANJIN INTERNATIONAL JOINT ACADEMY OF BIOMEDICINE	TIANJIN INTERNATIONAL JOINT ACADEMY OF BIOMEDICINE	TIANJIN INTERNATIONAL JOINT ACADEMY OF BIOMEDICINE	(CN106822156)_x000D_ 天津国际生物医药联合研究院			(CN106822156)_x000D_ TIANJIN INTERNATIONAL JOINT ACADEMY OF MEDICINE		CN	ACADEMY	CN					PENDING	PENDING	ALIVE	ALIVE		2037-03-27	Y02A-050/391	A61K-031/7024	1	0	0	0	1		Pharmaceuticals	(CN106822156)_x000D_ TANNINS(100,17)_x000D_ FLAVIVIRUS INFECTION VIRUS(100,1)_x000D_ GENUS FLAVIVIRUS NONSTRUCTURAL PROTEIN(100,1)_x000D_ NONSTEROIDAL ANTI INFLAMMATORY DRUG(60,1)_x000D_ ANTI ZIKA VIRUS(39,6)_x000D_ BROAD ZIKA VIRUS(39,1)_x000D_ COMPOUND PROTEASE(32,1)_x000D_ PROTEASE FIAVIVIRUSE(32,1)_x000D_ ORBITAL PAIN(31,1)_x000D_ SPOT PAPULE(30,1)_x000D_ FLAVIVIRUS INFECTION(29,5)_x000D_ FLA…	(CN106822156)_x000D_ The invention provides a compound aiming at flavivirus non-structural protein NS2B-NS3 protease.The compound is tannin which has a remarkable effect of inhibiting the activity of Zika virus NS2B-NS3 protease, so the compound provided by the invention can be used for preparing a micromolecular inhibitor for flavivirus protease.	(CN106822156)_x000D_ At present, use of aspirin for treatment of a broad Zika virus and non-steroidal anti-inflammatory drugs, but there is the possibility of infection and dengue fever Zika at the same time, the above agents may increase the risk of an animal._x000D_ Zika virus disease can result in a self-limiting infection, primary symptoms include low-grade fever, spot papules, joint pain, co…	(CN106822156)_x000D_ 1. Tannic acid in the use of flavivirus infection anti-zika viruses and the like, characterized in: tannic acid to	(CN106822156)_x000D_ The present invention provides a genus Flavivirus nonstructural protein to the NS2B-NS3 protease of the compound._x000D_ The present invention relates to the technical field of pharmacy, in particular a tannic acid in the use of a flavivirus infection anti-zika viruses and the like._x000D_ The present invention is directed to tannic acid in the use of a flavivirus infection a…
76504738	A61K-031/381_x000D_ A61K-031/41_x000D_ A61K-031/4178_x000D_ A61K-031/4245_x000D_ A61K-031/426_x000D_ A61K-031/4427_x000D_ A61K-031/4725_x000D_ A61K-031/497_x000D_ A61K-031/506_x000D_ A61K-031/5377_x000D_ C07D-277/30_x000D_ C07D-309/04_x000D_ C07D-333/24_x000D_ C07D-333/28_x000D_ C07D-333/38_x000D_ C07D-409/12_x000D_ C07D-413/12_x000D_ C07D-417/12_x000D_ C07D-417/14_x000D_ Y02A-050/385_x000D_ Y02A…	A61K-031/381_x000D_ A61K-031/41_x000D_ A61K-031/4178_x000D_ A61K-031/4245_x000D_ A61K-031/426_x000D_ A61K-031/4427_x000D_ A61K-031/4725_x000D_ A61K-031/497_x000D_ A61K-031/506_x000D_ A61K-031/5377_x000D_ C07D-211/56_x000D_ C07D-221/04_x000D_ C07D-239/47_x000D_ C07D-241/02_x000D_ C07D-333/02	Pharmaceuticals	WOEP2015080354	2015WO-EP80354	2015-12-17	2015	(WO2017102014)_x000D_ Propenamide thiophene derivatives as flavivirus inhibitors and their use	GUILLEMOT JEAN-CLAUDE_x000D_ BARRAL KARINE_x000D_ CANARD BRUNO_x000D_ QUERAT GILLES_x000D_ ALVAREZ KARINE_x000D_ NICOLAS DE LAMBALLERIE XAVIER_x000D_ MAHUTEAU-BETZER FLORENCE_x000D_ POINSARD CÉDRIC		(WO2017102014)_x000D_ GUILLEMOT, Jean-Claude_x000D_ BARRAL, Karine_x000D_ CANARD, Bruno_x000D_ QUERAT, Gilles_x000D_ ALVAREZ, Karine_x000D_ NICOLAS DE LAMBALLERIE, Xavier_x000D_ MAHUTEAU-BETZER, Florence_x000D_ POINSARD, Cédric	AIX MARSEILLE UNIVERSITE_x000D_ CNRS - CENTRE NATIONAL DE LA RECHERCHE SCIENTIFIQUE_x000D_ INSERM - INSTITUT NATIONAL DE LA SANTE ET DE LA RECHERCHE MEDICALE_x000D_ INSTITUT CURIE	AIX MARSEILLE UNIVERSITE_x000D_ CNRS - CENTRE NATIONAL DE LA RECHERCHE SCIENTIFIQUE_x000D_ INSERM - INSTITUT NATIONAL DE LA SANTE ET DE LA RECHERCHE MEDICALE_x000D_ INSTITUT CURIE	AIX MARSEILLE UNIVERSITE_x000D_ INSTITUT CURIE_x000D_ CNRS - CENTRE NATIONAL DE LA RECHERCHE SCIENTIFIQUE_x000D_ INSERM - INSTITUT NATIONAL DE LA SANTE ET DE LA RECHERCHE MEDICALE				(WO2017102014)_x000D_ UNIVERSITE D'AIX-MARSEILLE ([FR])_x000D_ INSTITUT CURIE ([FR])_x000D_ CENTRE NATIONAL DE LA RECHERCHE SCIENTIFIQUE ([FR])_x000D_ INSTITUT NATIONAL DE LA SANTE ET DE LA RECHERCHE MEDICALE ([FR])	(WO2017102014)_x000D_ INSTITUT NATIONAL DE LA SANTE ET DE LA RECHERCHE MEDICALE; CENTRE NATIONAL DE LA RECHERCHE SCIENTIFIQUE; INSTITUT CURIE; UNIVERSITE D'AIX-MARSEILLE	EP	ACADEMY;ACADEMY;ACADEMY;ACADEMY	WO	(WO2017102014)_x000D_ FR	(WO2017102014)_x000D_ NAME=UNIVERSITE D'AIX-MARSEILLE Jardin du Pharo 58 boulevard Charles Livon 13007 Marseille , POSTCODE=13007 , COUNTRY=FR _x000D_ _x000D_ NAME=INSTITUT CURIE 26 rue d'Ulm 75005 Paris Cedex 05 , POSTCODE=75005 , COUNTRY=FR _x000D_ _x000D_ NAME=CENTRE NATIONAL DE LA RECHERCHE SCIENTIFIQUE 3 rue Michel Ange 75016 Paris , POSTCODE=75016 , COUNTRY=FR _x000D_ _x000D_ NAME=INSTITUT …	(WO2017102014)_x000D_ FR	(WO2017102014)_x000D_ NAME=GUILLEMOT, Jean-Claude 14, rue Benoît Malon 13005 Marseille , POSTCODE=13005 , COUNTRY=FR _x000D_ _x000D_ NAME=BARRAL, Karine 9C, boulevard Saint-Simon 13009 Marseille , POSTCODE=13009 , COUNTRY=FR _x000D_ _x000D_ NAME=CANARD, Bruno 21, rue Michel Blanc 13260 Cassis , POSTCODE=13260 , COUNTRY=FR _x000D_ _x000D_ NAME=QUERAT, Gilles 7, square des Chardons Bleus Lotissemen…	PENDING	PENDING	ALIVE	ALIVE		2019-06-17	A61K-031/381	A61K-031/381	1	0	5	0	1	(WO2017102014)_x000D_ National States: AE AG AL AM AO AT AU AZ BA BB BG BH BN BR BW BY BZ CA CH CL CN CO CR CU CZ DE DK DM DO DZ EC EE EG ES FI GB GD GE GH GM GT HN HR HU ID IL IN IR IS JP KE KG KN KP KR KZ LA LC LK LR LS LU LY MA MD ME MG MK MN MW MX MY MZ NA NG NI NO NZ OM PA PE PG PH PL PT QA RO RS RU RW SA SC SD SE SG SK SL SM ST SV SY TH TJ TM TN TR TT TZ UA UG US UZ VC VN ZA ZM ZW_x000D_ AR…	Pharmaceuticals	(WO2017102014)_x000D_ ENAMIDE(100,102)_x000D_ HYDROGEN ATOM(61,55)_x000D_ DISORDER SYMPTOM(61,3)_x000D_ HALOGEN ATOM(50,35)_x000D_ FLAVIVIRUS INFECTION(40,6)_x000D_ FLAVIVIRIDAE FAMILY(39,2)_x000D_ PROPOXYPHENYL(38,11)_x000D_ ALKYL GROUP(37,43)_x000D_ FLUOROPHENYL(33,10)_x000D_ AMMONIA NRARB(33,5)_x000D_ DISORDER PROPHYLACTIC TREATMENT(33,1)_x000D_ ZIKA VIRUS(32,2)_x000D_ NITROGEN ATOM(31,21)_x00…	(WO2017102014)_x000D_ The present invention deals with new flavivirus inhibitors, compositions comprising said inhibitors and methods for the treatment of disorders related to a viral infection, such as a disease due to a flavivirus infection, comprising administering said inhibitors.	(WO2017102014)_x000D_ For this type of formulation, an agent such as cellulose, carbonate or starch is advantageously used._x000D_ Other aspects and advantages of the present invention will become apparent upon consideration of the following examples, which must be regarded as illustrative and nonrestrictive._x000D_ For this type of formulation, an agent such as cellulose, carbonates or starch is…	(WO2017102014)_x000D_ CLAIMS 1. Compound of the formula (A) (A) , wherein: - A is independently a C-R2 group or a nitrogen atom, - Z is independently a carbon atom or a nitrogen atom with the proviso that when Z is a nitrogen atom, the R4, R5, Rfi, R7, or group linked to said nitrogen atom is absent, and the number of nitrogen atoms is 1 or 2 Ri and R2 are chosen independently in the group consis…	(WO2017102014)_x000D_ Background of the invention Flavivirus is a genus of viruses of the Flaviviridae family including West Nile virus (WNV), dengue virus (DENV), tick-borne encephalitis virus (TBEV), Japanese encephalitis virus (JEV), yellow fever virus (YFV), Kunjin virus (KUNV), Zika virus (Zika) and several other viruses._x000D_ The first object of the present invention is a compound of form…	(WO2017102014)_x000D_ International Search Report [Examiner]_x000D_ -J.-J. YOON ET AL: "High-Throughput Screening--Based Identification of Paramyxovirus Inhibitors", JOURNAL OF BIOMOLECULAR SCREENING, vol. 13, no. 7, 1 July 2008 (2008-07-01), pages 591 - 608, XP055133058, ISSN: 1087-0571, DOI: 10.1177/1087057108321089CC=XP; XP055133058 (Cat. X,I)_x000D_ -DATABASE REGISTRY; CHEMICAL ABSTRA [online…
76514694	A61K-038/00_x000D_ C07K-014/00_x000D_ C07K-016/00_x000D_ C12N-015/70_x000D_ Y02A-050/389_x000D_ Y02A-050/391	A61K-038/16_x000D_ A61P-031/14_x000D_ C07K-014/00_x000D_ C07K-016/00_x000D_ C12N-015/11_x000D_ C12N-015/70	Pharmaceuticals	CN201611250972	2016CN-1250972	2016-12-29	2016	(CN106854236)_x000D_ Virus infection inhibition polypeptide, and gene, medicine and application thereof	WANG WEI_x000D_ LIU YANG_x000D_ CHEN LIMAN_x000D_ WANG SHAOBO_x000D_ YIPENG,ZHU QI	(CN106854236)_x000D_ 王薇_x000D_ 刘洋_x000D_ 陈黎曼_x000D_ 汪少伯_x000D_ 肖庚富	(CN106854236)_x000D_ WANG WEI_x000D_ LIU YANG_x000D_ CHEN LIMAN_x000D_ WANG SHAOBO_x000D_ YIPENG,ZHU QI	WUHAN INSTITUTE OF VIROLOGY CHINESE ACADEMY OF SCIENCES	WUHAN INSTITUTE OF VIROLOGY CHINESE ACADEMY OF SCIENCES	WUHAN INSTITUTE OF VIROLOGY CHINESE ACADEMY OF SCIENCES	(CN106854236)_x000D_ 中国科学院武汉病毒研究所			(CN106854236)_x000D_ WUHAN INSTITUTE OF VIROLOGY, CHINESE ACADEMY OF SCIENCES		CN	ACADEMY	CN					PENDING	PENDING	ALIVE	ALIVE		2036-12-29	Y02A-050/389	C07K-014/00	1	0	0	0	1		Pharmaceuticals	(CN106854236)_x000D_ VIRAL INFECTION(100,18)_x000D_ GENE(100,13)_x000D_ EXPRESSION VECTOR(100,11)_x000D_ ANTIBODY(100,9)_x000D_ DRUG(100,5)_x000D_ MEDICAMENT MANUFACTURE(100,4)_x000D_ GENE ENCODING(100,3)_x000D_ STRAIN(100,3)_x000D_ VIRAL INFECTION MANUFACTURE INHIBITION(100,1)_x000D_ JE ZIKA VIRUS(99,3)_x000D_ MEDICAMENT POPULARIZATION(84,1)_x000D_ VIRUS INTRUSION BRASIL(81,1)_x000D_ ACTIVE MEDI…	(CN106854236)_x000D_ The invention discloses a virus infection inhibition polypeptide, and a gene, a medicine and an application thereof, and belongs to the technical field of biomedicines.The virus infection inhibition polypeptide can safely, highly-efficiently and conveniently inhibit infection of a Japanese encephalitis virus or a Zika virus; the target gene connected with an expression polype…	(CN106854236)_x000D_ As compared with the prior art, the present invention has the advantages that: one of a polypeptide that inhibits viral infection, providing safe, efficient, and convenient to inhibit infection of virus or je Zika virus; through which the target gene in a host species expression vector for expression of target proteins, it is possible to rapidly acquire a large amount of prot…	(CN106854236)_x000D_ 1. A method of inhibiting a viral infection of the polypeptide, characterized in, 1st polypeptide is a polypeptide, polypeptide 2nd, 3rd polypeptide, polypeptide or polypeptide in the 4th 5th one or more; 1st polypeptide amino acid sequence of SEQ ID No. 1 as shown, as shown in SEQ ID No. 2 polypeptide amino acid sequence of 2nd, 3rd polypeptide amino acid sequence of SEQ ID …	(CN106854236)_x000D_ The present invention provides a polypeptide that inhibits viral infection, safe, efficient, and convenient to inhibit infection of virus or je Zika virus; through expression vector for expressing a polypeptide gene of interest in the host species is connected to express the polypeptide, it is possible to rapidly acquire a large amount of a polypeptide of interest; polypeptid…
76529718	C12Q-001/70/1	C12N-015/11_x000D_ C12Q-001/68_x000D_ C12Q-001/70	Biotechnology	CN201710136669	2017CN-0136669	2017-03-08	2017	(CN106868217)_x000D_ Detection primer for zika virus and applications of detection primer	LÜ GANG_x000D_ ZHU QIXUAN_x000D_ YIN FEIFEI_x000D_ ZHANG YOU_x000D_ WU YUE_x000D_ WANG SHANSHAN_x000D_ CHEN JINLONG_x000D_ FU RUIJIA_x000D_ LI YIJI	(CN106868217)_x000D_ 吕刚_x000D_ 朱奇轩_x000D_ 尹飞飞_x000D_ 张优_x000D_ 吴悦_x000D_ 王珊珊_x000D_ 陈锦龙_x000D_ 符瑞佳_x000D_ 李奕基	(CN106868217)_x000D_ LÜ GANG_x000D_ ZHU QIXUAN_x000D_ YIN FEIFEI_x000D_ ZHANG YOU_x000D_ WU YUE_x000D_ WANG SHANSHAN_x000D_ CHEN JINLONG_x000D_ FU RUIJIA_x000D_ LI YIJI	HAINAN MEDICAL COLLEGE	HAINAN MEDICAL COLLEGE	HAINAN MEDICAL COLLEGE	(CN106868217)_x000D_ 海南医学院			(CN106868217)_x000D_ HAINAN MEDICAL COLLEGE		CN	ACADEMY	CN					PENDING	PENDING	ALIVE	ALIVE		2037-03-30	C12Q-001/70/1	C12Q-001/70	1	0	0	0	1		Biotechnology	(CN106868217)_x000D_ DETECTION PRIMER(100,12)_x000D_ PRIMER(100,11)_x000D_ ZIKA VIRUS DETECTION PRIMER(100,10)_x000D_ DETECTION ZIKA VIRUS(100,5)_x000D_ PRIMER BASE SEQUENCE(100,3)_x000D_ PRIMER PAIR(100,3)_x000D_ PRIMER ZIKA VIRUS DETECTION(100,3)_x000D_ ZIKA VIRUS DETECTION(100,3)_x000D_ ZIKA VIRUS(91,23)_x000D_ ZIKA VIRUS PREPARATION(76,2)_x000D_ DIAGNOSTIC KIT(36,3)_x000D_ DETECTION KIT(34,5)…	(CN106868217)_x000D_ The invention provides a detection primer for the zika virus and applications of the detection primer, belonging to the field of medical examination.The detection primer for the zika virus provided by the invention can accurately and specifically detect the zika virus, the zika virus can be detected even when the concentration is as low as 1x10<1> copies/[mu]L, and thus the s…	(CN106868217)_x000D_ As compared with the prior art, the present invention has the advantages of: the present invention provides a Zika virus detection primer can be accurately, specific detection of the zika virus, concentrations as low as 1x101 copies / l still can check the measured, has a higher sensitivity; applying the detection primers for detection accuracy of the detection can be improve…	(CN106868217)_x000D_ 1. Zika virus detection of one primer, characterized in, detection primers include a primer pair, the base sequence of primer pairs are set forth in SEQ ID No. 1-2 shown._x000D_ 2. Claim 1 Zika virus detection of such as the use of primers in the detection Zika virus.	(CN106868217)_x000D_ The present invention provides a set of primers and detection of Zika virus application, the medical test pertaining to the field._x000D_ The present invention provides a primer capable of accurately detecting Zika virus, specific detection of the zika virus, a low concentration to 1x101 copies / l can check the measured still, has a higher sensitivity; using the detection pr…
76583365	Y02A-050/385_x000D_ Y02A-050/391	A61K-031/4425_x000D_ C07D-213/00_x000D_ C07F-001/08_x000D_ C08F-026/00_x000D_ C08G-012/26_x000D_ C08G-063/00_x000D_ C08G-063/83_x000D_ C08L-039/08_x000D_ C12Q-001/68	Macromolecular chemistry, polymers_x000D_ Pharmaceuticals	AU2017100590	2017AU-0100590	2017-05-22	2017	(AU2017100590)_x000D_ Crystalline copper-based coordination polymers and their use	CHEN JIN-XIANG_x000D_ XIE BAO-PING_x000D_ QIU GUI-HUA_x000D_ HU PEI-PEI_x000D_ LIANG ZHEN_x000D_ LIANG YE-MEI_x000D_ SUN BIN_x000D_ BAI LI-PING_x000D_ JIANG ZHI-HONG		(AU2017100590)_x000D_ CHEN, Jin-Xiang_x000D_ XIE, Bao-Ping_x000D_ QIU, Gui-Hua_x000D_ HU, Pei-Pei_x000D_ LIANG, Zhen_x000D_ LIANG, Ye-Mei_x000D_ SUN, Bin_x000D_ BAI, Li-Ping_x000D_ JIANG, Zhi-Hong	MACAU UNIVERSITY OF SCIENCE & TECHNOLOGY_x000D_ UNIVERSITY SOUTHERN MEDICAL	MACAU UNIVERSITY OF SCIENCE & TECHNOLOGY_x000D_ UNIVERSITY SOUTHERN MEDICAL	UNIVERSITY SOUTHERN MEDICAL_x000D_ MACAU UNIVERSITY OF SCIENCE & TECHNOLOGY				(AU2017100590)_x000D_ Southern Medical University_x000D_ Macau University of Science and Technology		AU	ACADEMY;ACADEMY	AU					GRANTED	GRANTED	ALIVE	ALIVE	(AU2017100590)_x000D_ 2017-06-22	2037-05-22	Y02A-050/385	C08G-063/00	1	0	0	0	1		Macromolecular chemistry, polymers_x000D_ Pharmaceuticals		(AU2017100590)_x000D_ The present invention provides a method of preparing a crystalline copper-based coordination polymer comprising and especially preferably but not exclusively comprising and in particular essentially consisting of repeating coordination entities extending in three 5 (3D) dimensions.The crystalline copper-based coordination polymer obtained or obtainable by the method proved t…
76584681	A61K-039/12_x000D_ A61K-039/39_x000D_ A61K-2039/5252_x000D_ A61K-2039/55505_x000D_ A61K-2039/55516_x000D_ A61K-2039/55561_x000D_ C12N-2770/24134_x000D_ C12N-2770/24151_x000D_ C12N-2770/24163_x000D_ Y02A-050/383_x000D_ Y02A-050/386_x000D_ Y02A-050/388_x000D_ Y02A-050/39_x000D_ Y02A-050/392	A61K-039/00_x000D_ A61K-039/12_x000D_ A61K-039/39_x000D_ C07K-014/005	Pharmaceuticals	EP15202585	2015EP-0202585	2015-12-23	2015	(WO2017109229)_x000D_ Virus purification	SCHLEGL ROBERT_x000D_ NEBENFÜHR MARIO_x000D_ WEBER MICHAEL_x000D_ WRUSS JÜRGEN	(KR20180097558)_x000D_ 바르베로 칼자도, 자나_x000D_ 니벤푸르, 마리오_x000D_ 슈레글, 로버트_x000D_ 베버, 미카엘_x000D_ 뷔러스, 유르겐	(WO2017109229)_x000D_ SCHLEGL, Robert_x000D_ NEBENFÜHR, Mario_x000D_ WEBER, Michael_x000D_ WRUSS, Jürgen	VALNEVA_x000D_ VALNEVA AUSTRIA	VALNEVA_x000D_ VALNEVA AUSTRIA	VALNEVA	(KR20180097558)_x000D_ 발네바 오스트리아 게엠베하			(WO2017109228)_x000D_ VALNEVA AUSTRIA GMBH ([AT])_x000D_ (WO2017109229)_x000D_ VALNEVA SE ([FR])_x000D_ (WO2017109224)_x000D_ VALNEVA SE ([FR])_x000D_ (WO2017109225)_x000D_ VALNEVA AUSTRIA GMBH ([AT])_x000D_ (WO2017109227)_x000D_ VALNEVA AUSTRIA GMBH ([AT])_x000D_ (WO2017109223)_x000D_ VALNEVA SE ([FR])_x000D_ (CA3009278)_x000D_ VALNEVA AUSTRIA GMBH ([AT])_x000D_ BARBERO CALZADO, JANA ([ZZ])_x000…	(WO2017109228)_x000D_ VALNEVA AUSTRIA GMBH_x000D_ (WO2017109229)_x000D_ VALNEVA SE_x000D_ (WO2017109224)_x000D_ VALNEVA SE_x000D_ (WO2017109225)_x000D_ VALNEVA AUSTRIA GMBH_x000D_ (WO2017109227)_x000D_ VALNEVA AUSTRIA GMBH_x000D_ (WO2017109223)_x000D_ VALNEVA SE_x000D_ (CA3009278)_x000D_ WEBER, MICHAEL; WRUSS, JURGEN; SCHLEGL, ROBERT; VALNEVA AUSTRIA GMBH; BARBERO CALZADO, JANA; NEBENFUHR, MARIO_…	AU	CORPORATE	EP	(WO2017109228)_x000D_ AT_x000D_ (WO2017109229)_x000D_ FR_x000D_ (WO2017109224)_x000D_ FR_x000D_ (WO2017109225)_x000D_ AT_x000D_ (WO2017109227)_x000D_ AT_x000D_ (WO2017109223)_x000D_ FR_x000D_ (CA3009278)_x000D_ ZZ; AT_x000D_	(WO2017109228)_x000D_ NAME=VALNEVA AUSTRIA GMBH Campus Vienna Biocenter 3 1030 Vienna , POSTCODE=69003 , COUNTRY=AT _x000D_ _x000D_ (WO2017109229)_x000D_ NAME=VALNEVA SE World Trade Center Lyon Tour Oxygene 10-12 boulevard Marius Vivier Merle 69003 Lyon , POSTCODE=69003 , COUNTRY=FR _x000D_ _x000D_ (WO2017109224)_x000D_ NAME=VALNEVA SE World Trade Center Lyon Tour Oxygène 10-12 boulevard Marius V…	(WO2017109229)_x000D_ AT	(WO2017109229)_x000D_ NAME=SCHLEGL, Robert Valneva Austria GmbH Rosenthal 63 2500 Siegenfeld , POSTCODE=2500 , COUNTRY=AT _x000D_ _x000D_ NAME=NEBENFÜHR, Mario Valneva Austria GmbH Grimmelshausengasse 12/27 1030 Vienna , POSTCODE=1030 , COUNTRY=AT _x000D_ _x000D_ NAME=WEBER, Michael Valneva Austria GmbH Rechte Wienzeile 249/15 1120 Vienna , POSTCODE=1120 , COUNTRY=AT _x000D_ _x000D_ NAME=WRUSS, J…	PENDING	(WO2017109223)_x000D_ PENDING_x000D_ (WO2017109224)_x000D_ PENDING_x000D_ (WO2017109225)_x000D_ PENDING_x000D_ (WO2017109227)_x000D_ PENDING_x000D_ (WO2017109228)_x000D_ PENDING_x000D_ (WO2017109229)_x000D_ PENDING_x000D_ (CA3009278)_x000D_ PENDING_x000D_ (BR112018012873)_x000D_ PENDING_x000D_ (AU2016375338)_x000D_ PENDING_x000D_ (SG11201805120Y)_x000D_ PENDING_x000D_ (KR20180097558)_x000D_ PENDI…	ALIVE	(WO2017109223)_x000D_ ALIVE_x000D_ (WO2017109224)_x000D_ ALIVE_x000D_ (WO2017109225)_x000D_ ALIVE_x000D_ (WO2017109227)_x000D_ ALIVE_x000D_ (WO2017109228)_x000D_ ALIVE_x000D_ (WO2017109229)_x000D_ ALIVE_x000D_ (CA3009278)_x000D_ ALIVE_x000D_ (BR112018012873)_x000D_ ALIVE_x000D_ (AU2016375338)_x000D_ ALIVE_x000D_ (SG11201805120Y)_x000D_ ALIVE_x000D_ (KR20180097558)_x000D_ ALIVE		(WO2017109223)_x000D_ 2019-09-18_x000D_ (WO2017109224)_x000D_ 2019-09-18_x000D_ (WO2017109225)_x000D_ 2019-06-23_x000D_ (WO2017109227)_x000D_ 2019-09-18_x000D_ (WO2017109228)_x000D_ 2019-09-18_x000D_ (WO2017109229)_x000D_ 2019-09-18_x000D_ (CA3009278)_x000D_ 2036-12-23_x000D_ (BR112018012873)_x000D_ 2036-12-23_x000D_ (AU2016375338)_x000D_ 2036-12-23_x000D_ (SG11201805120Y)_x000D_ 2036-12-23_x000D…	A61K-039/12	A61K-039/12	6	0	5	0	11	(WO2017109228)_x000D_ National States: AE AG AL AM AO AT AU AZ BA BB BG BH BN BR BW BY BZ CA CH CL CN CO CR CU CZ DE DJ DK DM DO DZ EC EE EG ES FI GB GD GE GH GM GT HN HR HU ID IL IN IR IS JP KE KG KH KN KP KR KW KZ LA LC LK LR LS LU LY MA MD ME MG MK MN MW MX MY MZ NA NG NI NO NZ OM PA PE PG PH PL PT QA RO RS RU RW SA SC SD SE SG SK SL SM ST SV SY TH TJ TM TN TR TT TZ UA UG US UZ VC VN ZA ZM ZW_…	Pharmaceuticals	(WO2017109228)_x000D_ INFECTIOUS ZIKA VIRUS PARTICLE(100,17)_x000D_ ZIKA VIRUS PREPARATION(67,12)_x000D_ ZIKA VIRUS PARTICLE(62,24)_x000D_ CRUDE HARVEST(55,15)_x000D_ RECOMBINANT PROTAMINE SULFATE(55,2)_x000D_ NON INFECTIOUS ZIKA VIRUS PARTICLE(53,1)_x000D_ PROTAMINE SALT(37,6)_x000D_ INFECTIOUS VIRUS PARTICLE(33,1)_x000D_ PROTAMINE SULFATE(28,18)_x000D_ IMPURITY REDUCTION(26,3)_x000D_ LIGAND ACT…	(WO2017109229)_x000D_ Described herein are improved purification methods for virus vaccines and compositions.Also described are Chikungunya, dengue, Japanese Encephalitis and yellow fever vaccines and methods of producing and administering said vaccines to subjects in need thereof.	(WO2017109229)_x000D_ A particular embodiment of the invention is the improved sucrose gradient that allows for an efficient protamine separation as shown in the experimental part._x000D_ Overall the present invention provides for an efficient process suitable to purify viral vaccines at industrial scale._x000D_ The industrial process as disclosed for IXIARO, providing a very effective vaccine ag…	(WO2017109229)_x000D_ CLAIMS is claimed is: Use of an optimized sucrose gradient centrifugation for removal of protamine sulphate from purified infectious virus particles._x000D_ A process of purification of infectious virus particles, comprising the steps of: a) providing a crude harvest (a) comprising virus particles and impurities, wherein the impurities are generated from growing said virus p…	(WO2017109229)_x000D_ Also provided are methods of administering said virus vaccines for the prevention of virus infection and/or for the production of an anti-virus immune response in subjects, for example subjects at risk of being exposed to virus._x000D_ In particular, the invention is directed to a virus vaccine comprising an optimally inactivated virus particle or a live attenuated virus par…	(WO2017109228)_x000D_ International Search Report [Examiner]_x000D_ -B. D. COX ET AL: "Predicting Zika virus structural biology: Challenges and opportunities for intervention", ANTIVIRAL CHEMISTRY & CHEMOTHERAPY., vol. 24, no. 3-4, 1 August 2015 (2015-08-01), GB, pages 118 - 126, XP055328128, ISSN: 0956-3202, DOI: 10.1177/2040206616653873CC=XP; XP055328128 (Cat. Y)_x000D_ -SRIVASTAVA A K ET AL: "…
76596697	C12Q-001/70/1	C12Q-001/68_x000D_ C12Q-001/70_x000D_ C12R-001/93	Biotechnology	CN201710069427	2017CN-0069427	2017-02-08	2017	(CN106884056)_x000D_ Primer, kit and method for detecting zika virus	GUO XUGUANG_x000D_ ZHOU YONGZHUO_x000D_ XIA YONG	(CN106884056)_x000D_ 郭旭光_x000D_ 周永焯_x000D_ 夏勇	(CN106884056)_x000D_ GUO XUGUANG_x000D_ ZHOU YONGZHUO_x000D_ XIA YONG	THIRD AFFILIATED HOSPITAL OF GUANGZHOU MEDICAL UNIVERSITY	THIRD AFFILIATED HOSPITAL OF GUANGZHOU MEDICAL UNIVERSITY	THIRD AFFILIATED HOSPITAL OF GUANGZHOU MEDICAL UNIVERSITY	(CN106884056)_x000D_ 广州医科大学附属第三医院			(CN106884056)_x000D_ THE THIRD AFFILIATED HOSPITAL OF GUANGZHOU MEDICAL UNIVERSITY		CN	ACADEMY	CN					PENDING	PENDING	ALIVE	ALIVE		2037-02-08	C12Q-001/70/1	C12Q-001/70	1	0	0	0	1		Biotechnology	(CN106884056)_x000D_ KIT(100,7)_x000D_ PRIMER ZIKA VIRUS(100,4)_x000D_ ZIKA VIRUS KIT(100,3)_x000D_ ZIKA VIRUS PRIMER(100,1)_x000D_ PRIMER ZIKA VIRUS DETECTION(69,1)_x000D_ ZIKA VIRUS DETECTION KIT(49,2)_x000D_ SENSITIVITY ZIKA VIRUS(43,1)_x000D_ PREGNANT WOMAN INFECTION(41,1)_x000D_ PRIMER(40,40)_x000D_ LAMP POOR GENERALITY(40,1)_x000D_ ISOTHERMAL AMPLIFICATION(38,4)_x000D_ ZIKA VIRUS DETECTION …	(CN106884056)_x000D_ The invention discloses primers, a kit and a method for detecting the zika virus.The primers comprise inner primers with the sequences SEQ ID.NO.1-SEQ ID.NO.2, outer primers with the sequences SEQ ID.NO.3-SEQ ID.NO.4, and loop primers with the sequences SEQ ID.NO.5-SEQ ID.NO.6.The kit provided by the invention is high in sensitivity, strong in sensitivity and rapid in detecti…	(CN106884056)_x000D_ The present invention has the following advantages:_x000D_ However, if a pregnant woman infection, fetal may be affected, leading cause of neonatal microcephaly and even death._x000D_ At present, loop mediated isothermal amplification techniques have been widely used in domestic and foreign various viruses, bacteria, parasites and the like cause the detection of disease, rapi…	(CN106884056)_x000D_ 1. A method for detecting Zika virus kit, characterized in, comprises a sequence consisting of an inner primer SEQID.NO.1-SEQID.NO.2, consists of an outer primer as SEQID.NO.3-SEQID.NO.4 sequence._x000D_ 4. A method for detecting a primer Zika virus, characterized in, comprises a sequence consisting of an inner primer SEQID.NO.1-SEQID.NO.2, consists of an outer primer as SEQI…	(CN106884056)_x000D_ The present invention discloses a primer Zika virus detection, a kit and method, comprising the sequence of SEQ ID.NO.1-SEQ ID.NO.2 inner primer as a primer, consisting of SEQ ID.NO.3-SEQ ID.NO.4 outer primers of the sequence, SEQ ID.NO.5-SEQ ID.NO.6 primer having a sequence consisting of a ring also._x000D_ An object of the present invention is to provide a method for detect…
76599911	G01N-033/569/83	G01N-033/569	Analysis of biological materials	CN201710133172	2017CN-0133172	2017-03-08	2017	(CN106885903)_x000D_ Zika virus (ZIKV) E antigen and application thereof in detecting anti-ZIKV antibody	YANG XIQIN_x000D_ FENG XIAOYAN_x000D_ ZHANG HEQIU_x000D_ Feng Xiaoyan_x000D_ LIU ZHIQIANG_x000D_ ZHANG XUHUI	(CN106885903)_x000D_ 杨锡琴_x000D_ 冯晓燕_x000D_ 张贺秋_x000D_ 修冰水_x000D_ 刘志强_x000D_ 张旭辉	(CN106885903)_x000D_ YANG XIQIN_x000D_ FENG XIAOYAN_x000D_ ZHANG HEQIU_x000D_ Feng Xiaoyan_x000D_ LIU ZHIQIANG_x000D_ ZHANG XUHUI	INSTITUTE OF BASIC MEDICAL SCIENCES ACADEMY OF MILITARY MEDICAL SCIENCES	INSTITUTE OF BASIC MEDICAL SCIENCES ACADEMY OF MILITARY MEDICAL SCIENCES	INSTITUTE OF BASIC MEDICAL SCIENCES ACADEMY OF MILITARY MEDICAL SCIENCES	(CN106885903)_x000D_ 中国人民解放军军事医学科学院基础医学研究所			(CN106885903)_x000D_ INSTITUTE OF BASIC MEDICAL SCIENCES, THE ACADEMY OF MILITARY MEDICAL SCIENCES		CN	ACADEMY;ACADEMY	CN					PENDING	PENDING	ALIVE	ALIVE		2037-03-08	G01N-033/569/83	G01N-033/569	1	0	1	0	1		Analysis of biological materials	(CN106885903)_x000D_ ZIKA VIRUS E ANTIGEN(100,12)_x000D_ E VIRUS ANTIBODY(100,1)_x000D_ VIRAL ANTIBODY DETECTION(100,1)_x000D_ ZIKA VIRUS ANTIGEN(100,1)_x000D_ ZIKA VIRUS GENOME(82,2)_x000D_ ANTIGEN SPECIFICITY(70,1)_x000D_ EXPERIMENT RISK(59,1)_x000D_ IMMUNODIAGNOSTIC REAGENT(58,3)_x000D_ ANTI VIRUS ANTIBODY(57,3)_x000D_ HUMAN DETECTION ANTIBODY(55,1)_x000D_ EXPRESSED PROTEIN(52,1)_x000D_ VIRAL …	(CN106885903)_x000D_ The invention belongs to the field of immunity detection of an anti-zika virus (ZIKV) antibody, and particularly relates to a ZIKV E antigen and application thereof in detecting the anti-ZIKV antibody.After a ZIKV gene group and the expression protein thereof are analyzed, the E antigen for specifically detecting the anti-ZIKV antibody is found, the anti-ZIKV antibody in huma…	(CN106885903)_x000D_ The present invention has the advantages of:	(CN106885903)_x000D_ 1. One Zika virus E antigen, characterized in, into any of the following amino acid sequence of the antigen: 1) Sequence Listing as SEQ ID No. 1 of the amino acid sequence; 2) SEQ ID No. 1 to 80% or more similarity with an amino acid sequence as shown in the sequence._x000D_ 3. Claim 1 or 2 E virus antibodies in detecting anti-zika Zika virus antigen in the application.	(CN106885903)_x000D_ The present invention belongs to the field of antiviral antibody immunoassay anti-zika, Zika virus E antigen and in particular to an anti-virus antibody anti-zika the use of the detection._x000D_ Zika virus genome to the present invention and its expressed protein analysis, of an antibody capable of specifically detecting anti-ZIKV E has been found antigen, antigen specificit…
76602366	C12Q-001/68/44	C12Q-001/68_x000D_ C12Q-001/70_x000D_ C12R-001/93	Biotechnology	CN201710172355	2017CN-0172355	2017-03-22	2017	(CN106884057)_x000D_ Visual detection method for zika virus	LI GENG_x000D_ ZHANG WEI_x000D_ CHEN SITAI_x000D_ WU JIANGUO_x000D_ LAI XIAOPING	(CN106884057)_x000D_ 李耿_x000D_ 张威_x000D_ 陈思泰_x000D_ 吴建国_x000D_ 赖小平	(CN106884057)_x000D_ LI GENG_x000D_ ZHANG WEI_x000D_ CHEN SITAI_x000D_ WU JIANGUO_x000D_ LAI XIAOPING	GUANGZHOU UNIVERSITY OF CHINESE MEDICINE	GUANGZHOU UNIVERSITY OF CHINESE MEDICINE	GUANGZHOU UNIVERSITY OF CHINESE MEDICINE	(CN106884057)_x000D_ 广州中医药大学			(CN106884057)_x000D_ UNIV GUANGZHOU CHINESE MEDICINE		CN	ACADEMY	CN					PENDING	PENDING	ALIVE	ALIVE		2037-03-22	C12Q-001/68/44	C12Q-001/70	1	0	0	0	1		Biotechnology	(CN106884057)_x000D_ ZIKA VIRUS(100,19)_x000D_ VISUALIZATION DETECTION(100,2)_x000D_ ZIKA VIRUS VISUALIZATION(100,1)_x000D_ NANOPARTICLE AUNP(78,1)_x000D_ GOLD ZIKA VIRUS(77,1)_x000D_ COLLOIDAL GOLD PARTICLE(64,1)_x000D_ NITROCELLULOSE MEMBRANE COATING(61,1)_x000D_ LOOP MEDIATED RNA FRAGMENT(58,1)_x000D_ ZIKA VIRUS NUCLEIC ACID(57,5)_x000D_ ZHAI CARD EXPANSION(56,2)_x000D_ HYBRID ZIKA DIAGNOSIS(5…	(CN106884057)_x000D_ The invention relates to a visual detection method for a zika virus.The method comprises three steps of extracting a zika virus nucleic acid, amplifying an RNA segment of a zika virus NS5 gene by adopting a loop-mediated amplification system and carrying out detection by adopting a nucleic acid chromatography test strip containing a to-be-detected sample.The method has the ad…	(CN106884057)_x000D_ Currently, diagnosis of the method for Zika virus at home and abroad, is primarily depending on the virus culture, serological tests, a conventional RT-PCR detection and a Real-time PCR, wherein, serological tests, have low sensitivity to tissue culture, and immunological cross-reaction is a disadvantage that longer; and the RT-PCR there are also susceptible to contamination,…	(CN106884057)_x000D_ 1. Zika virus visualization of one detection method, the method comprises the following steps: Take zika (1) virus, the biological Technologies Inc. Easy Pure Viral DNA/RNA Kit manufactured by Beijing full type gold Zika virus nucleic acid extraction of the specification; Zika virus nucleic acid as a template to (2) step (1) yields labels, by a loop mediated isothermal amplif…	(CN106884057)_x000D_ The present invention relates to a method of visualization Zika virus is detected, the method comprises extracting Zika virus nucleic acid, virus NS5 gene amplification system using a loop-mediated RNA fragments and expansion of zhai card of the test strip containing the test samples using three steps of detecting a nucleic acid chromatography._x000D_ The present invention re…
76708325	A61K-031/122_x000D_ Y02A-050/391	A61K-031/122_x000D_ A61P-031/14	Pharmaceuticals	CN201710228904	2017CN-0228904	2017-04-10	2017	(CN106924230)_x000D_ Application of dithranol in zika virus and other flavivirus infection resistance	YANG HAITAO_x000D_ HU CAN_x000D_ WANG ZEFANG_x000D_ CHEN CHENG_x000D_ CAI YAN_x000D_ LI SHUANG_x000D_ FU SHENG	(CN106924230)_x000D_ 杨海涛_x000D_ 胡灿_x000D_ 王泽方_x000D_ 陈成_x000D_ 蔡岩_x000D_ 李爽_x000D_ 傅晟	(CN106924230)_x000D_ YANG HAITAO_x000D_ HU CAN_x000D_ WANG ZEFANG_x000D_ CHEN CHENG_x000D_ CAI YAN_x000D_ LI SHUANG_x000D_ FU SHENG	TIANJIN INTERNATIONAL JOINT ACADEMY OF BIOMEDICINE	TIANJIN INTERNATIONAL JOINT ACADEMY OF BIOMEDICINE	TIANJIN INTERNATIONAL JOINT ACADEMY OF BIOMEDICINE	(CN106924230)_x000D_ 天津国际生物医药联合研究院			(CN106924230)_x000D_ TIANJIN INTERNATIONAL JOINT ACADEMY OF BIOMEDICINE		CN	ACADEMY	CN					PENDING	PENDING	ALIVE	ALIVE		2037-04-10	Y02A-050/391	A61K-031/122	1	0	0	0	1		Pharmaceuticals	(CN106924230)_x000D_ ANTHRALIN(100,17)_x000D_ FLAVIVIRUS INFECTION VIRUS(100,2)_x000D_ GENUS FLAVIVIRUS NONSTRUCTURAL PROTEIN(100,1)_x000D_ NONSTEROIDAL ANTI INFLAMMATORY DRUG(60,1)_x000D_ ANTHRALIN ANTI ZIKA VIRUS(55,1)_x000D_ BROAD ZIKA VIRUS(39,1)_x000D_ ANTI ZIKA VIRUS(32,3)_x000D_ COMPOUND PROTEASE(32,1)_x000D_ PROTEASE FIAVIVIRUSE(32,1)_x000D_ FLAVIVIRUS INFECTION(31,4)_x000D_ MOLECULE INHI…	(CN106924230)_x000D_ The invention provides a compound for nonstructural protein NS2B-NS3 protease of flavivirus.The compound is dithranol, and has significant inhibitory activity against the NS2B-NS3 protease of the zika virus.Therefore, the compound provided by the invention can be used for preparing a small molecule inhibitor of flavivirus protease.	(CN106924230)_x000D_ At present, use of aspirin for treatment of a broad Zika virus and non-steroidal anti-inflammatory drugs, but Zika and dengue exist at the same potential of infection, the above agents may increase the risk of an animal._x000D_ Zika virus disease can result in a self-limiting infection, primary symptoms include low-grade fever, spot papules, joint pain, conjunctivitis, other …	(CN106924230)_x000D_ 1. Anthralin anti-zika viruses and the like in the use of flavivirus infection, characterized in: anthralin to .	(CN106924230)_x000D_ The present invention provides a genus Flavivirus nonstructural protein to the NS2B-NS3 protease of the compound._x000D_ The present invention relates to the technical field of pharmacy, and particularly the anthralin in the use of a flavivirus infection anti-zika viruses and the like._x000D_ The present invention aims to provide anthralin in the use of a flavivirus infection…
76760998	A01M-001/20_x000D_ A01N-031/14_x000D_ A01N-037/46	A01M-001/20_x000D_ A01N-031/14_x000D_ A01N-037/46_x000D_ A01N-053/02_x000D_ A01N-053/08_x000D_ A01P-007/04	Basic materials chemistry_x000D_ Other special machines	JP2016003657	2016JP-0003657	2016-01-12	2016	(WO2017122687)_x000D_ Blood-sucking-arthropod control method and blood-sucking-arthropod control composition for treating elements that form living spaces	DAIDO HIDENORI_x000D_ KAWASE AYUMI_x000D_ SASAKURA NIIHA	(WO2017122687)_x000D_ 大同 英則 ([JP])_x000D_ 川瀬 あゆみ ([JP])_x000D_ 笹倉 新葉 ([JP])	(WO2017122687)_x000D_ DAIDO, Hidenori_x000D_ KAWASE, Ayumi_x000D_ SASAKURA, Niiha	MITSUI CHEMICALS AGRO	MITSUI CHEMICALS AGRO	MITSUI CHEMICALS AGRO	(WO2017122687)_x000D_ 三井化学アグロ株式会社 ([JP])			(WO2017122687)_x000D_ MITSUI CHEMICALS AGRO, INC. ([JP])	(WO2017122687)_x000D_ MITSUI CHEMICALS AGRO, INC.	BR	CORPORATE	JP	(WO2017122687)_x000D_ JP	(WO2017122687)_x000D_ NAME=MITSUI CHEMICALS AGRO, INC. 1-19-1, Nihonbashi, Chuo-ku, Tokyo 1030027 , POSTCODE=〒1030027 , COUNTRY=JP _x000D_	(WO2017122687)_x000D_ JP	(WO2017122687)_x000D_ NAME=DAIDO, Hidenori c/o Mitsui Chemicals Agro, Inc.,1-19-1, Nihonbashi, Chuo-ku, Tokyo 1030027 , POSTCODE=〒1030027 , COUNTRY=JP _x000D_ _x000D_ NAME=KAWASE, Ayumi c/o Mitsui Chemicals Agro, Inc.,1-19-1, Nihonbashi, Chuo-ku, Tokyo 1030027 , POSTCODE=〒1030027 , COUNTRY=JP _x000D_ _x000D_ NAME=SASAKURA, Niiha c/o Mitsui Chemicals Agro, Inc.,1-19-1, Nihonbashi, Chuo-ku, Tokyo 1…	PENDING	(WO2017122687)_x000D_ PENDING_x000D_ (BR112018014039)_x000D_ PENDING	ALIVE	(WO2017122687)_x000D_ ALIVE_x000D_ (BR112018014039)_x000D_ ALIVE		(WO2017122687)_x000D_ 2019-07-12_x000D_ (BR112018014039)_x000D_ 2037-01-11	A01M-001/20	A01N-037/46	2	0	0	0	2	(WO2017122687)_x000D_ National States: AE AG AL AM AO AT AU AZ BA BB BG BH BN BR BW BY BZ CA CH CL CN CO CR CU CZ DE DJ DK DM DO DZ EC EE EG ES FI GB GD GE GH GM GT HN HR HU ID IL IN IR IS JP KE KG KH KN KP KR KW KZ LA LC LK LR LS LU LY MA MD ME MG MK MN MW MX MY MZ NA NG NI NO NZ OM PA PE PG PH PL PT QA RO RS RU RW SA SC SD SE SG SK SL SM ST SV SY TH TJ TM TN TR TT TZ UA UG US UZ VC VN ZA ZM ZW_…	Basic materials chemistry_x000D_ Other special machines	(WO2017122687)_x000D_ ELECTROMECHANICAL CONTACT(100,36)_x000D_ MECHANICAL CONTACT(100,2)_x000D_ MOBILE COMMUNICATION CHARGE(100,1)_x000D_ FEMALE TERMINAL(81,2)_x000D_ CONTACT FORCE(58,5)_x000D_ FEMALE(57,2)_x000D_ CYLINDRICALLY ROLLED CONTACT HEAD(57,1)_x000D_ ROUNDED AREA(57,1)_x000D_ CHARGER(55,22)_x000D_ SECURE ELECTROMECHANICAL CONTACT(50,4)_x000D_ CONTACT CYLINDRICAL SHAPE(47,3)_x000D_ MATIN…	(WO2017122687)_x000D_ A blood-sucking-arthropod control method in which elements that form a living space are treated with a blood-sucking-arthropod control composition for treating elements that form a living space, the control composition containing at least one amide derivative represented by general formula (1) as an active ingredient. (In the formula, Q represents a phenyl group or a phenyl …	(WO2017122687)_x000D_ It is only necessary to set time periods set in the charger._x000D_ As used herein the materials for the spring contact or the mating contact or for each of their contact heads are less expensive than gold-plated contact heads.	(WO2017122687)_x000D_ 0.3 N contact system for mechanical contact forces < electromechanical, comprising a first contact head having a female terminal and rigidly supported, a second contact head has a mating contact, whose second contact head has contacted the first contact head of the spring contact contacts at intervals, characterized in, that at least the first contact head (7) of the spring …	(WO2017122687)_x000D_ It is an object of the present invention, on the basis of an electromechanical contact system of the type mentioned initially, such an electromechanical contact system in such a way to improve in terms of cost-effective manner, even in the case that there is always a secure electromechanical contact with very low contact forces is ensured._x000D_ The invention relates to a l…
76761723	A61K-031/381_x000D_ A61K-031/4453_x000D_ A61K-031/7034_x000D_ C07C-235/64_x000D_ C07D-211/58_x000D_ C07H-015/203	A61K-031/165_x000D_ A61K-031/381_x000D_ A61K-031/4409_x000D_ A61K-031/4453_x000D_ A61K-031/4545_x000D_ A61K-031/7034_x000D_ A61P-031/14_x000D_ A61P-035/00_x000D_ C07C-233/87_x000D_ C07C-235/84_x000D_ C07D-213/46_x000D_ C07D-213/81_x000D_ C07D-333/22_x000D_ C07D-401/04_x000D_ C07H-015/207	Pharmaceuticals	US62/277,653P	2016US-62277653	2016-01-12	2016	(WO2017123809)_x000D_ Compounds for inhibiting cancer and virus	YEN YUN_x000D_ LIOU JING-PING_x000D_ LIU YUN-RU	(TW201734028)_x000D_ 閻 雲_x000D_ 劉景平_x000D_ 劉韻如	(WO2017123809)_x000D_ LIOU, Jing-Ping_x000D_ YEN, Yun_x000D_ LIU, Yun-Ru	TAIPEI MEDICAL UNIVERSITY	TAIPEI MEDICAL UNIVERSITY	TAIPEI MEDICAL UNIVERSITY	(TW201734028)_x000D_ 臺北醫學大學			(WO2017123809)_x000D_ TAIPEI MEDICAL UNIVERSITY ([TW])_x000D_ (CA3011289)_x000D_ TAIPEI MEDICAL UNIVERSITY ([TW])_x000D_ YEN, YUN ([ZZ])_x000D_ LIOU, JING-PING ([ZZ])_x000D_ LIU, YUN-RU ([ZZ])_x000D_ (TW201734028)_x000D_ UNIV TAIPEI MEDICAL ([TW])	(WO2017123809)_x000D_ TAIPEI MEDICAL UNIVERSITY_x000D_ (CA3011289)_x000D_ YEN, YUN; LIU, YUN-RU; LIOU, JING-PING; TAIPEI MEDICAL UNIVERSITY_x000D_ (TW201734028)_x000D_ UNIV TAIPEI MEDICAL	CA	ACADEMY	US	(WO2017123809)_x000D_ TW_x000D_ (CA3011289)_x000D_ ZZ; TW_x000D_ (TW201734028)_x000D_ TW	(WO2017123809)_x000D_ NAME=TAIPEI MEDICAL UNIVERSITY 250 Wuxing Street Taipei City 110 , POSTCODE=110 , COUNTRY=TW _x000D_ _x000D_ (CA3011289)_x000D_ NAME=TAIPEI MEDICAL UNIVERSITY 250 WUXING STREET 110 , CITY=TAIPEI CITY , COUNTRY=TW _x000D_ _x000D_ NAME=TAIPEI MEDICAL UNIVERSITY 250 WUXING STREET 110 , CITY=TAIPEI CITY , COUNTRY=TW _x000D_ _x000D_ NAME=YEN, YUN , CITY=NA , COUNTRY=ZZ _x000D_ _x…	(WO2017123809)_x000D_ TW; US	(WO2017123809)_x000D_ NAME=LIOU, Jing-Ping 250 Wuxing Street Taipei City 110 , POSTCODE=110 , COUNTRY=TW _x000D_ _x000D_ NAME=YEN, Yun 1301 Oaklawn Road Arcadia, CA 91006 , POSTCODE=91006 , COUNTRY=US _x000D_ _x000D_ NAME=LIU, Yun-Ru 250 Wuxing Street Taipei City 110 , POSTCODE=110 , COUNTRY=TW _x000D_	PENDING	(WO2017123809)_x000D_ PENDING_x000D_ (CA3011289)_x000D_ PENDING_x000D_ (TW201734028)_x000D_ PENDING	ALIVE	(WO2017123809)_x000D_ ALIVE_x000D_ (CA3011289)_x000D_ ALIVE_x000D_ (TW201734028)_x000D_ ALIVE		(WO2017123809)_x000D_ 2019-07-12_x000D_ (CA3011289)_x000D_ 2037-01-12_x000D_ (TW201734028)_x000D_ 2037-01-12	A61K-031/381	C07H-015/207	3	0	4	0	3	(WO2017123809)_x000D_ National States: AE AG AL AM AO AT AU AZ BA BB BG BH BN BR BW BY BZ CA CH CL CN CO CR CU CZ DE DJ DK DM DO DZ EC EE EG ES FI GB GD GE GH GM GT HN HR HU ID IL IN IR IS JP KE KG KH KN KP KR KW KZ LA LC LK LR LS LU LY MA MD ME MG MK MN MW MX MY MZ NA NG NI NO NZ OM PA PE PG PH PL PT QA RO RS RU RW SA SC SD SE SG SK SL SM ST SV SY TH TJ TM TN TR TT TZ UA UG US UZ VC VN ZA ZM ZW_…	Pharmaceuticals	(WO2017123809)_x000D_ ZIKA VIRUS(100,8)_x000D_ CELL DIFFERENTIATION DYSREGULATION(80,1)_x000D_ ZIKA VIRUS INFECTION(71,7)_x000D_ STEREOISOMER(70,14)_x000D_ TAUTOMER(66,15)_x000D_ TUMOR GROWTH INHIBITION(66,3)_x000D_ SOLVATE(62,15)_x000D_ THERAPEUTIC AGENT(61,8)_x000D_ TISSUE HOMEOSTASIS MAINTENANCE(59,2)_x000D_ ENANTIOMER(58,19)_x000D_ VITAL ORGAN(55,1)_x000D_ SATURATED HETEROCYCLIC RING(54,5)_x0…	(WO2017123809)_x000D_ The invention relates to compounds for inhibiting a cancer cell or a virus.Particularly, the invention provides compounds for inhibiting, treating and/or preventing cancer and Zika virus.	(WO2017123809)_x000D_ [ 0062 ] The compounds of the present invention may be useful in combination with one or more second therapeutic agents, particularly therapeutic agents suitable for the treatment and/or prevention of the conditions and diseases presented previously._x000D_ Cancer is a group of diseases characterized by dysregulation of cell differentiation and proliferation; in advanced sta…	(WO2017123809)_x000D_ 1. A compound having the following Formula (I), wherein X is 0, N or S; m is an integer of 1 to 4; n is an integer of 1 to 5; Ri is halogen, NH2, NO2, OH, Ci-ioalkyl, C2-ioalkenyl, C2-ioalkynyl, Ci-ioalkyloxy or Ci- loalkylthio; R.2 is furanosyl, pyranosyl, -Ci-ioalkyloxy-C(0)Ci-ioalkyl or COR4, wherein R4 is a 5- or 6- membered saturated or unsaturated heterocyclic ring con…	(WO2017123809)_x000D_ [ 0001 ] The invention relates to compounds for inhibiting a cancer cell or a virus._x000D_ Particularly, the invention provides compounds for inhibiting, treating and/or preventing cancer and Zika virus._x000D_ [ 0005 ] The invention provides a series of prodrugs of niclosamide and their superior efficacy in inhibition, prevention and/or treatment of a cancer or Zika virus …
76761786	C12P-019/34_x000D_ C12Q-001/68/46_x000D_ C12Q-001/68/93_x000D_ C12Q-001/70/2_x000D_ C12Q-001/70/3	C07H-021/04_x000D_ C12N-015/09_x000D_ C12P-019/34_x000D_ C12Q-001/68	Biotechnology_x000D_ Organic fine chemistry	US62/278,095P	2016US-62278095	2016-01-13	2016	(WO2017123921)_x000D_ Multiple stage isothermal enzymatic amplification	BAU HAIM H_x000D_ MAUK MICHAEL G_x000D_ SONG JINZHAO_x000D_ LIU CHANGCHUN		(WO2017123921)_x000D_ BAU, Haim, H._x000D_ MAUK, Michael, G._x000D_ SONG, Jinzhao_x000D_ LIU, Changchun	UNIVERSITY OF PENNSYLVANIA	UNIVERSITY OF PENNSYLVANIA	UNIVERSITY OF PENNSYLVANIA				(WO2017123921)_x000D_ THE TRUSTEES OF THE UNIVERSITY OF PENNSYLVANIA ([US])	(WO2017123921)_x000D_ THE TRUSTEES OF THE UNIVERSITY OF PENNSYLVANIA	US	ACADEMY	US	(WO2017123921)_x000D_ US	(WO2017123921)_x000D_ NAME=THE TRUSTEES OF THE UNIVERSITY OF PENNSYLVANIA 3160 Chestnut Street Suite 200 Philadelphia, PA 19104 , POSTCODE=19104 , COUNTRY=US _x000D_	(WO2017123921)_x000D_ US	(WO2017123921)_x000D_ NAME=BAU, Haim, H. 538 Rutgers Avenue Swarthmore, PA 19081 , POSTCODE=19081 , COUNTRY=US _x000D_ _x000D_ NAME=MAUK, Michael, G. 3122 Kennett Pike Wilmington, DE 19807 , POSTCODE=19807 , COUNTRY=US _x000D_ _x000D_ NAME=SONG, Jinzhao 4247 Locust Street, #305 Philadelphia, PA 19104 , POSTCODE=19104 , COUNTRY=US _x000D_ _x000D_ NAME=LIU, Changchun 723 Kenmare Road Bala Cynwyd, P…	PENDING	PENDING	ALIVE	ALIVE		2019-07-13	C12P-019/34	C07H-021/04	1	0	2	0	1	(WO2017123921)_x000D_ National States: AE AG AL AM AO AT AU AZ BA BB BG BH BN BR BW BY BZ CA CH CL CN CO CR CU CZ DE DJ DK DM DO DZ EC EE EG ES FI GB GD GE GH GM GT HN HR HU ID IL IN IR IS JP KE KG KH KN KP KR KW KZ LA LC LK LR LS LU LY MA MD ME MG MK MN MW MX MY MZ NA NG NI NO NZ OM PA PE PG PH PL PT QA RO RS RU RW SA SC SD SE SG SK SL SM ST SV SY TH TJ TM TN TR TT TZ UA UG US UZ VC VN ZA ZM ZW_…	Biotechnology_x000D_ Organic fine chemistry	(WO2017123921)_x000D_ NUCLEIC ACID AMPLIFICATION(100,49)_x000D_ RECOMBINASE POLYMERASE AMPLIFICATION REACTION(100,15)_x000D_ ISOTHERMAL AMPLIFICATION(76,45)_x000D_ ISOTHERMAL ENZYMATIC AMPLIFICATION(69,59)_x000D_ AMPLIFICATION PRODUCT(57,71)_x000D_ ISOTHERMAL TEMPERATURE(47,18)_x000D_ STRONGYIOIDES STERCORALIS(39,1)_x000D_ RECOMBINASE POLYMERASE REACTION(36,6)_x000D_ DISEASE STATE VITAL CLUE(35,1…	(WO2017123921)_x000D_ Disclosed herein are methods for multiple stage isothermal amplification of nucleic acid comprising a first substantially isothermal amplification reaction on the nucleic acid to generate a first amplification product and at least one substantially isothermal amplification reaction on the first amplification product to generate at least one second amplification product in an…	(WO2017123921)_x000D_ As no denaturation is necessary for this process, recombinase polymerase amplification reactions can be performed substantially isothermally_x000D_ These highly sensitive methods are also easily implemented in clinical, point-of-care, and other in-the-field settings to generate the necessary quantity of nucleic acids for downstream detection and characterization._x000D_ [000…	(WO2017123921)_x000D_ 1. A multiple stage nucleic acid amplification, comprising: a first recombinase polymerase amplification reaction performed at a substantially isothermal temperature to generate a first amplification product, the nucleic acid serving as a template for the recombinase polymerase amplification reaction; and at least one subsequent loop-mediated amplification reaction performed…	(WO2017123921)_x000D_ [0003] This disclosure relates to the field of nucleic acid amplification._x000D_ [0006] In one aspect, the present disclosure provides methods for multiple stage isothermal enzymatic amplification of nucleic acids, comprising: a first recombinase polymerase amplification reaction performed at a substantially isothermal temperature to generate a first amplification product, …	(WO2017123921)_x000D_ International Search Report [Examiner]_x000D_ -CARDOSO ET AL.: "Visual Detection of Turkey Coronavirus RNA in Tissues and Feces by . Reverse-Transcription Loop-Mediated Isothermal Amplification (RT-LAMP) with Hydroxynaphthol Blue Dye", MOLECULAR AND CELLULAR PROBES, vol. 24, 31 December 2010 (2010-12-31), pages 415 - 417, XP027452768CC=XP; XP027452768 (Cat. A)_x000D_ -CRANNE…
76761846	C12Q-001/70/1_x000D_ C12Q-2600/112_x000D_ C12Q-2600/158_x000D_ C12Q-2600/16	C12N-001/00_x000D_ C12N-007/00_x000D_ C12N-007/02_x000D_ C12N-015/10_x000D_ C12N-015/11_x000D_ C12P-019/34_x000D_ C12Q-001/68	Biotechnology	US62/278,967P	2016US-62278967	2016-01-14	2016	(WO2017124054)_x000D_ Methods and reagents for detection of chikungunya virus and zika virus	PINSKY BENJAMIN A_x000D_ WAGGONER JESSE		(WO2017124054)_x000D_ PINSKY, Benjamin, A._x000D_ WAGGONER, Jesse	STANFORD UNIVERSITY	STANFORD UNIVERSITY	STANFORD UNIVERSITY				(WO2017124054)_x000D_ THE BOARD OF TRUSTEES OF THE LELAND STANFORD JUNIOR UNIVERSITY ([US])	(WO2017124054)_x000D_ THE BOARD OF TRUSTEES OF THE LELAND STANFORD JUNIOR UNIVERSITY	US	ACADEMY	US	(WO2017124054)_x000D_ US	(WO2017124054)_x000D_ NAME=THE BOARD OF TRUSTEES OF THE LELAND STANFORD JUNIOR UNIVERSITY Offive Of Technology Licensing 3000 El Camino Real Building Five, Third Floor Palo Alto, CA 94306 , POSTCODE=94306 , COUNTRY=US _x000D_	(WO2017124054)_x000D_ US	(WO2017124054)_x000D_ NAME=PINSKY, Benjamin, A. 816 Borden Rae Court San Jose, CA 95117 , POSTCODE=95117 , COUNTRY=US _x000D_ _x000D_ NAME=WAGGONER, Jesse 1502 N. Amanda Cir. NE Atlanta, GA 30329 , POSTCODE=30329 , COUNTRY=US _x000D_	PENDING	PENDING	ALIVE	ALIVE		2019-07-19	C12Q-001/70/1	C12N-001/00	1	0	2	0	1	(WO2017124054)_x000D_ National States: AE AG AL AM AO AT AU AZ BA BB BG BH BN BR BW BY BZ CA CH CL CN CO CR CU CZ DE DJ DK DM DO DZ EC EE EG ES FI GB GD GE GH GM GT HN HR HU ID IL IN IR IS JP KE KG KH KN KP KR KW KZ LA LC LK LR LS LU LY MA MD ME MG MK MN MW MX MY MZ NA NG NI NO NZ OM PA PE PG PH PL PT QA RO RS RU RW SA SC SD SE SG SK SL SM ST SV SY TH TJ TM TN TR TT TZ UA UG US UZ VC VN ZA ZM ZW_…	Biotechnology	(WO2017124054)_x000D_ FORWARD PRIMER(100,125)_x000D_ CHIKUNGUNYA VIRUS(100,64)_x000D_ ZIKA VIRUS(100,62)_x000D_ BIOLOGICAL SAMPLE(100,59)_x000D_ NUCLEIC ACID AMPLIFICATION ASSAY(100,33)_x000D_ NUCLEOTIDE(100,24)_x000D_ KIT(100,21)_x000D_ ISOLATED OLIGONUCLEOTIDE(100,6)_x000D_ REVERSE PRIMER(87,102)_x000D_ CHIKUNGUNYA VIRUS RNA(62,40)_x000D_ TETRAMETHYLRHODAMINE(61,25)_x000D_ PRIMER(60,225)_x000D_…	(WO2017124054)_x000D_ Methods and oligonucleotide reagents for diagnosing chikungunya virus and Zika virus infections are described.In particular, the invention relates to quantitative assays that can detect all lineages of chikungunya virus and Zika virus and distinguish chikungunya virus and Zika virus from each other as well as dengue virus and other arbovirus pathogens.	(WO2017124054)_x000D_ It will be appreciated that the hybridizing sequences need not have perfect complementarity to provide stable hybrids._x000D_ The methods are useful for detecting chikungunya and Zika viruses in biological samples such as blood samples, including without limitation, in whole blood, serum and plasma._x000D_ If infection is detected, an individual can be given appropriate ther…	(WO2017124054)_x000D_ 1. A composition for detecting chikungunya virus in a biological sample using a nucleic acid amplification assay, the composition comprising at least one set of oligonucleotide primers comprising a forward primer and a reverse primer capable of amplifying at least a portion of a chikungunya virus genome, wherein said primers are not more than 40 nucleotides in length, wherei…	(WO2017124054)_x000D_ In another aspect, the invention includes a method for detecting chikungunya virus, the method comprising: a) contacting nucleic acids of a biological sample suspected of containing chikungunya virus with a composition, as described herein, for detecting chikungunya virus by nucleic acid amplification of viral RNA, b) amplifying at least a portion of a chikungunya virus RNA,…	(WO2017124054)_x000D_ International Search Report [Examiner]_x000D_ -WAGGONER, J.: "Once Bitten: Multiplex Detection of Dengue, Chikungunya and Emerging Arboviruses", NORTHERN CALIFORNIA BRANCH AMERICAN SOCIETY FOR MICROBIOLOGY , FALL 2014 MEETING, 4 October 2014 (2014-10-04), pages 1 - 45, XP055400135, Retrieved from the Internet <URL:www.asmbranches.org/brcano/meetings/2014FallPpts/2Waggoner_Je…
76806607	A01N-025/02_x000D_ A01N-025/04_x000D_ A01N-025/10_x000D_ A01N-065/00_x000D_ A01N-065/06_x000D_ A01N-065/12_x000D_ A01N-065/20_x000D_ A01N-065/22_x000D_ A01N-065/24_x000D_ A01N-065/44_x000D_ A61K-008/92/2_x000D_ A61Q-017/02_x000D_ Y02A-050/327_x000D_ Y02A-050/338_x000D_ Y02A-050/339_x000D_ Y02A-050/34_x000D_ Y02A-050/348	A01N-025/04_x000D_ A01N-025/10_x000D_ A01N-065/00_x000D_ A01N-065/06_x000D_ A01N-065/08_x000D_ A01N-065/12_x000D_ A01N-065/20_x000D_ A01N-065/22_x000D_ A01N-065/24_x000D_ A01N-065/44_x000D_ A61K-008/92_x000D_ A61K-036/00_x000D_ A61K-036/53_x000D_ A61Q-017/02	Basic materials chemistry_x000D_ Organic fine chemistry_x000D_ Pharmaceuticals	US62/281,347P	2016US-62281347	2016-01-21	2016	(US20170319465)_x000D_ Topical mosquito control product	MURRAY R CHARLES_x000D_ HARLIN JOHN		(US20170319465)_x000D_ Murray R. Charles_x000D_ Harlin John	PENTA 5	PENTA 5	PENTA 5		MURRAY R CHARLES; FROM 2017-01-25 TO 2017-01-25_x000D_ HARLIN JOHN; FROM 2017-01-25 TO 2017-01-25_x000D_ PENTA 5; FROM 2017-01-25	(US20170208822)_x000D_ PENTA 5 USA FLORIDA; EFFD=2017-03-21_x000D_ (US20170319465)_x000D_ PENTA 5 USA FLORIDA; EFFD=2017-01-25	(US20170208822)_x000D_ Penta 5 USA, LLC ([US])_x000D_ (US20170319465)_x000D_ Penta 5 USA, LLC ([US])_x000D_ (WO2017127799)_x000D_ PENTA 5 USA, LLC ([US])	(US20170208822)_x000D_ Penta 5 USA, LLC_x000D_ (US20170319465)_x000D_ Penta 5 USA, LLC_x000D_ (WO2017127799)_x000D_ PENTA 5 USA, LLC	US	CORPORATE	US	(US20170208822)_x000D_ US_x000D_ (US20170319465)_x000D_ US_x000D_ (WO2017127799)_x000D_ US	(US20170208822)_x000D_ NAME=Penta 5 USA, LLC , CITY=Sarasota , STATE=FL , COUNTRY=US _x000D_ _x000D_ (US20170319465)_x000D_ NAME=Penta 5 USA, LLC , CITY=Sarasota , STATE=FL , COUNTRY=US _x000D_ _x000D_ (WO2017127799)_x000D_ NAME=PENTA 5 USA, LLC 1610 Northgate Blvd. Sarasota, FL 34234 , POSTCODE=34234 , COUNTRY=US _x000D_	(US20170319465)_x000D_ US	(US20170319465)_x000D_ NAME=Murray R. Charles , CITY=Sarasota , STATE=FL , COUNTRY=US _x000D_ _x000D_ NAME=Harlin John , CITY=Sarasota , STATE=FL , COUNTRY=US _x000D_	PENDING	(US20170208822)_x000D_ PENDING_x000D_ (US20170319465)_x000D_ PENDING_x000D_ (WO2017127799)_x000D_ PENDING	ALIVE	(US20170208822)_x000D_ ALIVE_x000D_ (US20170319465)_x000D_ ALIVE_x000D_ (WO2017127799)_x000D_ ALIVE		(US20170208822)_x000D_ 2037-01-23_x000D_ (US20170319465)_x000D_ 2037-07-21_x000D_ (WO2017127799)_x000D_ 2019-07-21	A61K-008/92/2	A61K-008/92	2	0	4	6	3	(WO2017127799)_x000D_ National States: AE AG AL AM AO AT AU AZ BA BB BG BH BN BR BW BY BZ CA CH CL CN CO CR CU CZ DE DJ DK DM DO DZ EC EE EG ES FI GB GD GE GH GM GT HN HR HU ID IL IN IR IS JP KE KG KH KN KP KR KW KZ LA LC LK LR LS LU LY MA MD ME MG MK MN MW MX MY MZ NA NG NI NO NZ OM PA PE PG PH PL PT QA RO RS RU RW SA SC SD SE SG SK SL SM ST SV SY TH TJ TM TN TR TT TZ UA UG US UZ VC VN ZA ZM ZW_…	Basic materials chemistry_x000D_ Organic fine chemistry_x000D_ Pharmaceuticals	(US20170208822)_x000D_ TOPICAL MOSQUITO REPELLENT(100,13)_x000D_ TOPICAL MOSQUITO CONTROL PRODUCT(100,6)_x000D_ REPELLING INSECT(100,5)_x000D_ INERT INGREDIENT(84,28)_x000D_ BEE WAX(55,25)_x000D_ LOTION(53,23)_x000D_ CITRONELLA OIL(45,24)_x000D_ EXPOSING INSECT(43,5)_x000D_ SOYBEAN OIL(39,28)_x000D_ ACTIVE INGREDIENT(37,20)_x000D_ ANISE OIL(36,14)_x000D_ BASIL OIL(34,18)_x000D_ ISOPROPYL ALCOHOL(…	(US20170319465)_x000D_ A topical mosquito control product includes active and inert ingredients.The active ingredients include natural materials and may include soybean oil, geraniol, cinnamon oil and cedar wood oil.The inert ingredients include natural materials and may include bee's wax, isopropyl alcohol, sunflower oil, salt, triethyl citrate and water.		(US20170319465)_x000D_ 1. A topical mosquito repellent composition comprising: a lotion including active and inert ingredients, wherein the active ingredients include soybean oil, cinnamon oil, cedar wood oil and_x000D_ 5. A method of repelling insects comprising: applying a lotion composition to a body and exposing insects to the lotion, the lotion including active and inert ingredients, wherein…	(US20170319465)_x000D_ [0007] Also disclosed is a method of repelling insects which includes applying the lotion compositions to a body and exposing insects to the lotion._x000D_ [0024] In another aspect, the composition may include bee's wax, soybean oil, edible oil such as avocado oil or sunflower oil, isopropyl alcohol, peppermint oil, citronella oil, and thyme oil._x000D_ [0027] In another as…	(WO2017127799)_x000D_ International Search Report [Examiner]_x000D_ -MAIA ET AL.: "Plant-based insect repellents: a review of their efficacy, development and testing", MALARIA JOURNAL, vol. 10, no. 1, 2011, pages 11, XP021098544, Retrieved from the Internet <URL:https://www.researchgate.net/profile/Sarah_Moore39/publication/50408598_Plant-based_insect _repellents_A_review_of_their_efficacy_develo…
76865504	A61K-038/00_x000D_ A61K-039/00_x000D_ A61K-039/015_x000D_ A61K-039/12_x000D_ C07K-014/08_x000D_ C12N-2770/24134_x000D_ C12N-2770/36134_x000D_ Y02A-050/383_x000D_ Y02A-050/386_x000D_ Y02A-050/388_x000D_ Y02A-050/39_x000D_ Y02A-050/392_x000D_ Y02A-050/394_x000D_ Y02A-050/396_x000D_ Y02A-050/412	A61K-038/02_x000D_ A61K-039/12_x000D_ A61P-037/04_x000D_ C07K-014/08_x000D_ C12N-015/40	Pharmaceuticals	US62/286,779P	2016US-62286779	2016-01-25	2016	(WO2017132210)_x000D_ Interventions for flavivirus infections	BREMEL ROBERT D_x000D_ HOMAN JANE_x000D_ IMBODEN MICHAEL		(WO2017132210)_x000D_ BREMEL, Robert, D._x000D_ HOMAN, Jane_x000D_ IMBODEN, Michael	IOGENETICS	IOGENETICS	IOGENETICS				(WO2017132210)_x000D_ IOGENETICS, LLC ([US])	(WO2017132210)_x000D_ IOGENETICS, LLC	US	CORPORATE	US	(WO2017132210)_x000D_ US	(WO2017132210)_x000D_ NAME=IOGENETICS, LLC 3591 Anderson Street Suite 218 Madison, WI 53704 , POSTCODE=53704 , COUNTRY=US _x000D_	(WO2017132210)_x000D_ US	(WO2017132210)_x000D_ NAME=BREMEL, Robert, D. E3352 Chapel Road Hillpoint, WI 53937 , POSTCODE=53937 , COUNTRY=US _x000D_ _x000D_ NAME=HOMAN, Jane E3352 Chapel Road Hillpoint, WI 53937 , POSTCODE=53937 , COUNTRY=US _x000D_ _x000D_ NAME=IMBODEN, Michael 564 Park Lane Madison, WI 53711 , POSTCODE=53711 , COUNTRY=US _x000D_	PENDING	PENDING	ALIVE	ALIVE		2019-07-25	A61K-039/12	A61K-038/02	1	0	0	0	1	(WO2017132210)_x000D_ National States: AE AG AL AM AO AT AU AZ BA BB BG BH BN BR BW BY BZ CA CH CL CN CO CR CU CZ DE DJ DK DM DO DZ EC EE EG ES FI GB GD GE GH GM GT HN HR HU ID IL IN IR IS JP KE KG KH KN KP KR KW KZ LA LC LK LR LS LU LY MA MD ME MG MK MN MW MX MY MZ NA NG NI NO NZ OM PA PE PG PH PL PT QA RO RS RU RW SA SC SD SE SG SK SL SM ST SV SY TH TJ TM TN TR TT TZ UA UG US UZ VC VN ZA ZM ZW_…	Pharmaceuticals	(WO2017132210)_x000D_ ZIKA VIRUS(100,57)_x000D_ DIAGNOSTIC(100,19)_x000D_ ANTIBODY DETECTION(100,5)_x000D_ SYNTHETIC ZIKA VIRUS POLYPEPTIDE(100,5)_x000D_ FLAVIVIRUS VIRUS(100,2)_x000D_ FUSION PROTEIN(91,25)_x000D_ ZIKA VIRUS IMMUNOGEN(89,8)_x000D_ FUSION POLYPEPTIDE(85,13)_x000D_ ZIKA VIRUS ENVELOPE POLYPEPTIDE(81,3)_x000D_ USUTU VIRUS(74,23)_x000D_ PLASMODIUM FALCIPARUM PROTEIN(73,3)_x000D_ PLAS…	(WO2017132210)_x000D_ The present invention relates to vaccine compositions and therapeutic interventions for treating and preventing infections and diseases caused by flaviviruses, including Zika, dengue, and Usutu virus.It also relates to compositions and methods for diagnosis and differential diagnosis of flaviviruses and co-endemic pathogens.	(WO2017132210)_x000D_ An additional embodiment of the invention utilizes the techniques known in the art for the construction of Fab expression libraries (Huse et al., Science, 246:1275-1281 [1989]) to allow rapid and easy identification of monoclonal Fab fragments with the desired specificity._x000D_ Auger electrons are advantageous as they have a short path of transit through tissue._x000D_ End…	(WO2017132210)_x000D_ 1. A synthetic Zika virus polypeptide comprising one or more B cell epitopes and one or more_x000D_ 57. A diagnostic system for detection of antibodies to flavivirus virus comprising one or more synthetic	(WO2017132210)_x000D_ The invention provides compositions and methods based on identification of Plasmodium epitopes which cross react with Zika and related flaviviruses._x000D_ The present invention relates to vaccine compositions and therapeutic interventions for treating and preventing flavivirus infection and disease._x000D_ It further relates to diagnostics for flavivirus infection._x000D_ I…	(WO2017132210)_x000D_ International Search Report [Examiner]_x000D_ -FREIRE ET AL.: "Spread of the pandemic Zika virus lineage is associated with NS1 codon usage adaptation in humans", BIORXIV, 25 November 2015 (2015-11-25), pages 1 - 8, XP055314270, Retrieved from the Internet <URL:http://biorxiv.org/conten/biorxiv/early/ 2015/11/25 /032839.full.pdf> [retrieved on 20170524]CC=XP; XP055314270 (Ca…
76915051	A61K-039/12_x000D_ C12N-2710/24143_x000D_ C12N-2770/24134_x000D_ C12N-2770/24171_x000D_ Y02A-050/392	A61K-039/00_x000D_ A61K-039/12_x000D_ A61K-039/275_x000D_ A61K-039/285_x000D_ C12N-007/00_x000D_ C12N-007/01_x000D_ C12N-007/04_x000D_ C12N-015/79_x000D_ C12N-015/86_x000D_ C12N-015/863	Pharmaceuticals	US62/290,744P	2016US-62290744	2016-02-03	2016	(WO2017136419)_x000D_ Compositions and methods for generating an immune response to a flavivirus	GUIRAKHOO FARSHAD_x000D_ DOMI ARBAN_x000D_ MCCURLEY NATHANAEL PAUL		(WO2017136419)_x000D_ GUIRAKHOO, Farshad_x000D_ DOMI, Arban_x000D_ MCCURLEY, Nathanael, Paul	GEOVAX	GEOVAX	GEOVAX				(WO2017136419)_x000D_ GEOVAX INC. ([US])	(WO2017136419)_x000D_ GEOVAX INC.	BR	CORPORATE	US	(WO2017136419)_x000D_ US	(WO2017136419)_x000D_ NAME=GEOVAX INC. 1900 Lake Park Drive Suite 380 Smyrna, GA 30080 , POSTCODE=30080 , COUNTRY=US _x000D_	(WO2017136419)_x000D_ US	(WO2017136419)_x000D_ NAME=GUIRAKHOO, Farshad 21 Ferry Landing Lane NW, #1708 Atlanta, GA 30309 , POSTCODE=30309 , COUNTRY=US _x000D_ _x000D_ NAME=DOMI, Arban 13 Huntcliff Village Ct. Atlanta, GA 30350 , POSTCODE=30350 , COUNTRY=US _x000D_ _x000D_ NAME=MCCURLEY, Nathanael, Paul 927 Scott Blvd, Apt 219 Decatur, GA 30030 , POSTCODE=30030 , COUNTRY=US _x000D_	PENDING	(WO2017136419)_x000D_ PENDING_x000D_ (BR112018015696)_x000D_ PENDING	ALIVE	(WO2017136419)_x000D_ ALIVE_x000D_ (BR112018015696)_x000D_ ALIVE		(WO2017136419)_x000D_ 2019-08-03_x000D_ (BR112018015696)_x000D_ 2037-02-01	A61K-039/12	C12N-007/00	2	2	2	0	2	(WO2017136419)_x000D_ National States: AE AG AL AM AO AT AU AZ BA BB BG BH BN BR BW BY BZ CA CH CL CN CO CR CU CZ DE DJ DK DM DO DZ EC EE EG ES FI GB GD GE GH GM GT HN HR HU ID IL IN IR IS JP KE KG KH KN KP KR KW KZ LA LC LK LR LS LU LY MA MD ME MG MK MN MW MX MY MZ NA NG NI NO NZ OM PA PE PG PH PL PT QA RO RS RU RW SA SC SD SE SG SK SL SM ST SV SY TH TJ TM TN TR TT TZ UA UG US UZ VC VN ZA ZM ZW_…	Pharmaceuticals	(WO2017136419)_x000D_ VECTOR(100,95)_x000D_ IMMUNE RESPONSE(100,52)_x000D_ FLAVIVIRUS STRUCTURAL PROTEIN(100,12)_x000D_ FLAVIVIRIDAE VIRUS INFECTION(100,6)_x000D_ MODIFIED VACCINIA ANKARA(100,5)_x000D_ FLAVIVIRUS PROTEIN(72,3)_x000D_ SEQUENCE ENCODING(60,14)_x000D_ FLAVIVIRUS NONSTRUCTURAL PROTEIN(59,6)_x000D_ FLAVIVIRIDAE VIRUS INFECTION SYMPTOM(48,1)_x000D_ APPROVED PREVENTIVE(44,1)_x000D_ ZIKA…	(WO2017136419)_x000D_ The compositions and methods are described for generating an immune response to a flavivirus such as Zika virus.The compositions and methods described herein relate to a modified vaccinia Ankara (MVA) vector encoding one or more viral antigens for generating a protective immune response to a member of genus Flavivirus (such as a member of species Zika virus), in the subject …	(WO2017136419)_x000D_ In one embodiment the present invention provides a vaccine that permits at least partial, if not_x000D_ The compositions and methods of the present invention are useful both prophylactically and therapeutically._x000D_ The compositions of the present invention are useful for inducing an immune response to a flavivirus._x000D_ It was first isolated in 1947 in Uganda, but unti…	(WO2017136419)_x000D_ CLAIMS We Claim: 1. A recombinant modified vaccinia Ankara (MVA) vector comprising at least one nucleic acid sequence encoding at least one Flavivirus protein, wherein the at least one nucleic acid sequence is inserted into the MVA vector under the control of at least one promoter compatible with poxvirus expression systems._x000D_ 11. A pharmaceutical composition comprising…	(WO2017136419)_x000D_ In a first aspect, the present invention is a recombinant modified vaccinia Ankara (MVA) vector comprising at least one nucleic acid sequence encoding a Flavivirus protein, wherein the at least one nucleic acid sequence is inserted into the MVA vector under the control of at least one promoter compatible with poxvirus expression systems._x000D_ In a second aspect, the presen…	(WO2017136419)_x000D_ International Search Report [Examiner]_x000D_ -WYATT, LS ET AL.: "Elucidating and Minimizing the Loss by Recombinant Vaccinia Virus of Human Immunodeficiency Virus Gene Expression Resulting from Spontaneous Mutations and Positive Selection", JOURNAL OF VIROLOGY, vol. 83, no. 14, July 2009 (2009-07-01), pages 7176 - 7184, XP002663544CC=XP; XP002663544 (Cat. Y)_x000D_ -MUSSO, …
76961871	A61K-031/7072_x000D_ A61K-045/06_x000D_ Y02A-050/391	A61K-031/7068_x000D_ A61K-031/7072_x000D_ A61K-045/06_x000D_ A61P-031/12_x000D_ A61P-031/14_x000D_ C07H-019/207	Pharmaceuticals	US62/296,024P	2016US-62296024	2016-02-16	2016	(US20170232031)_x000D_ Inhibitors of Zika Virus	SMITH MARK_x000D_ KLUMPP KLAUS G		(US20170232031)_x000D_ Smith Mark_x000D_ Klumpp Klaus G.	RIBOSCIENCE	RIBOSCIENCE	RIBOSCIENCE				(US20170232031)_x000D_ Riboscience LLC ([US])_x000D_ (WO2017142984)_x000D_ RIBOSCIENCE LLC ([US])	(US20170232031)_x000D_ Riboscience LLC_x000D_ (WO2017142984)_x000D_ RIBOSCIENCE LLC	US	CORPORATE	US	(US20170232031)_x000D_ US_x000D_ (WO2017142984)_x000D_ US	(US20170232031)_x000D_ NAME=Riboscience LLC , CITY=Palo Alto , STATE=CA , COUNTRY=US _x000D_ _x000D_ (WO2017142984)_x000D_ NAME=RIBOSCIENCE LLC 3901 Laguna Avenue Palo Alto, California 94306 , POSTCODE=94306 , COUNTRY=US _x000D_	(US20170232031)_x000D_ US	(US20170232031)_x000D_ NAME=Smith Mark , CITY=San Francisco , STATE=CA , COUNTRY=US _x000D_ _x000D_ NAME=Klumpp Klaus G. , CITY=West Chester , STATE=PA , COUNTRY=US _x000D_	PENDING	(US20170232031)_x000D_ PENDING_x000D_ (WO2017142984)_x000D_ PENDING	ALIVE	(US20170232031)_x000D_ ALIVE_x000D_ (WO2017142984)_x000D_ ALIVE		(US20170232031)_x000D_ 2037-02-16_x000D_ (WO2017142984)_x000D_ 2019-08-16	A61K-031/7072	A61K-031/7068	2	0	2	0	2	(WO2017142984)_x000D_ National States: AE AG AL AM AO AT AU AZ BA BB BG BH BN BR BW BY BZ CA CH CL CN CO CR CU CZ DE DJ DK DM DO DZ EC EE EG ES FI GB GD GE GH GM GT HN HR HU ID IL IN IR IS JP KE KG KH KN KP KR KW KZ LA LC LK LR LS LU LY MA MD ME MG MK MN MW MX MY MZ NA NG NI NO NZ OM PA PE PG PH PL PT QA RO RS RU RW SA SC SD SE SG SK SL SM ST SV SY TH TJ TM TN TR TT TZ UA UG US UZ VC VN ZA ZM ZW_…	Pharmaceuticals	(US20170232031)_x000D_ DIHYDROXYTETRAHYDROFURAN(100,41)_x000D_ ZIKA VIRUS(100,36)_x000D_ PATIENT(100,30)_x000D_ ZIKA VIRUS INHIBITOR(100,4)_x000D_ DIHYDROPYRIMIDIN(99,50)_x000D_ PHOSPHORYL(82,50)_x000D_ AZIDO(64,53)_x000D_ METHOXY(59,48)_x000D_ DIYL DIPROPIONATE(54,3)_x000D_ ZIKA VIRUS PROPHYLAXIS(46,1)_x000D_ BENZYL(39,28)_x000D_ TETRAHYDROFURAN(37,9)_x000D_ ZIKA VIRAL REPLICATION(33,1)_x000D_ D…	(US20170232031)_x000D_ wherein the variables R1, R2, R3, R4, R5, and Base are defined as described hereinabove.	(US20170232031)_x000D_ Specifically, there is a need to develop therapeutics and compounds that selectively inhibit Zika viral replication that are useful for preventing Zika Virus infection in general and, critically, in pregnant women, and treating Zika-infected patients._x000D_ A skilled formulation scientist may modify the formulations within the teachings of the specification to provide nume…	(US20170232031)_x000D_ 1. A method of preventing or treating Zika Virus comprising administering to a patient in need thereof a compound selected from the group consisting of: benzyl ((((2R,3S,4R,5R)-2-azido-5-(2,4-dioxo-3,4-dihydropyrimidin-1(2H)-yl)-3,4-dihydroxytetrahydrofuran-2-yl)methoxy)(naphthalen-1-yloxy)phosphoryl)-L-alaninate; tert-butyl ((((2R,3S,4R,5R)-2-azido-5-(2,4-dioxo-3,4-dihydro…	(US20170232031)_x000D_ Herein disclosed are nucleoside analogues that have been developed to exhibit these therapeutic properties in the treatment of Zika Virus._x000D_ The application provides methods for treatment or prophylaxis of Zika Virus mediated diseases with compounds of Formula I_x000D_ [0012] The application provides a method for preventing or treating Zika Virus comprising administeri…
76962386	A61K-039/12_x000D_ A61K-2039/505_x000D_ A61K-2039/53_x000D_ A61K-2039/54_x000D_ A61K-2039/545_x000D_ A61K-2039/575_x000D_ C07K-016/06/5_x000D_ C07K-016/10_x000D_ C07K-016/10/81_x000D_ C07K-2317/10_x000D_ C07K-2317/21_x000D_ C07K-2317/76_x000D_ C12N-007/00_x000D_ C12N-2760/12134_x000D_ C12N-2760/14134_x000D_ C12N-2770/24134_x000D_ C12N-2770/36134	A61K-039/12_x000D_ C07K-016/06_x000D_ C07K-016/10_x000D_ C12N-007/00	Pharmaceuticals	US62/260,023P	2015US-62260023	2015-11-25	2015	(US20170233459)_x000D_ Systems and Methods for the Production of Human Polyclonal Antibodies	HOOPER W JAY_x000D_ SULLIVAN EDDIE_x000D_ WU HUA		(US20170233459)_x000D_ Hooper, W Jay_x000D_ Sullivan Eddie_x000D_ Wu Hua	SAB LLC	SAB LLC	SAB LLC		SULLIVAN EDDIE; FROM 2016-11-25 TO 2017-10-06_x000D_ WU HUA; FROM 2016-11-25 TO 2017-10-06_x000D_ HOOPER JAY; FROM 2016-11-25 TO 2017-10-13_x000D_ SAB LLC; FROM 2017-10-06	(US20170233459)_x000D_ SOUTH DAKOTA; EFFD=2018-01-11	(US20170233459)_x000D_ SAB Biotherapeutics, Inc. ([US])	(US20170233459)_x000D_ SAB Biotherapeutics, Inc.	US	CORPORATE	US	(US20170233459)_x000D_ US	(US20170233459)_x000D_ NAME=SAB Biotherapeutics, Inc. , CITY=Sioux Falls , STATE=SD , COUNTRY=US _x000D_	(US20170233459)_x000D_ US	(US20170233459)_x000D_ NAME=Hooper, W Jay , CITY=New Market , STATE=MN , COUNTRY=US _x000D_ _x000D_ NAME=Sullivan Eddie , CITY=Sioux Falls , STATE=SD , COUNTRY=US _x000D_ _x000D_ NAME=Wu Hua , CITY=Sioux Falls , STATE=SD , COUNTRY=US _x000D_	PENDING	PENDING	ALIVE	ALIVE		2036-11-25	C07K-016/06/5	C07K-016/06	1	0	0	0	1		Pharmaceuticals	(US20170233459)_x000D_ HUMAN ANTIBODY(100,26)_x000D_ PATHOGEN(100,26)_x000D_ POLYCLONAL ANTIBODY(100,10)_x000D_ HUMAN POLYCLONAL ANTIBODY(100,8)_x000D_ HUMAN POLYCLONAL ANTIBODY PRODUCTION(100,1)_x000D_ OLIGOCLONAL COCKTAIL DEVELOPMENT(78,1)_x000D_ PATHOGEN DERIVED DNA VACCINE(64,10)_x000D_ OUTBREAK SCENARIO(63,1)_x000D_ RECOMBINANT GLYCOPROTEIN(62,1)_x000D_ SYMPTOM SEVERITY(62,1)_x000D_ TRANSCHR…	(US20170233459)_x000D_ Disclosed herein is a method for producing human antibodies against a pathogen comprising injecting a non-human animal with a pathogen-derived DNA vaccine in at least two locations of the animal; injecting the animal with an adjuvant in a location of the animal different from the location of the DNA vaccine location; collecting plasma from the animal after the injections; a…	(US20170233459)_x000D_ As will be appreciated by a person having skill in the art, other post-injection booster intervals are possible._x000D_ Humans who have survived HPS are not required for this product, and although it is made in an animal, there is no need for a despeciation step._x000D_ In the case of a vaccine, an "effective dose" is one that prevents disease or reduces the severity of sym…	(US20170233459)_x000D_ 1. A method for producing human antibodies against a pathogen comprising: a. injecting a non-human animal with a pathogen-derived DNA vaccine in at least two locations of the animal; b. injecting the animal with an adjuvant in a location of the animal different from the location of the DNA vaccine location; c. collecting plasma from the animal after the injections; and d. p…	(US20170233459)_x000D_ Disclosed herein is a method for producing human antibodies against a pathogen comprising injecting a non-human animal with a pathogen-derived DNA vaccine in at least two locations of the animal; injecting the animal with an adjuvant in a location of the animal different from the location of the DNA vaccine location; collecting plasma from the animal after the injections; a…
76970039	A47D-009/00_x000D_ A47D-011/00/5_x000D_ A47D-013/02_x000D_ A47D-013/06/3	A47D-009/00_x000D_ A47D-011/00_x000D_ A47D-013/02_x000D_ A47D-013/06	Furniture, games	BR202016008919U	2016BR-U008919	2016-04-20	2016	(BR202016008919)_x000D_ APPLIED CONSTRUCTIVE DISPOSAL IN PORTABLE CRADLE WITH MOSQUITO NETTING	ADMAR PAULO SENA GUEDES		(BR202016008919)_x000D_ ADMAR PAULO SENA GUEDES	ADMAR PAULO SENA GUEDES						(BR202016008919)_x000D_ ADMAR PAULO SENA GUEDES ([BR])_x000D_ (BR202016008919)_x000D_ ADMAR PAULO SENA GUEDES	(BR202016008919)_x000D_ ADMAR PAULO SENA GUEDES	BR	ID	BR	(BR202016008919)_x000D_ BR	(BR202016008919)_x000D_ NAME=ADMAR PAULO SENA GUEDES , COUNTRY=BR _x000D_			PENDING	PENDING	ALIVE	ALIVE		2031-04-20	A47D-009/00	A47D-009/00	1	0	0	0	1		Furniture, games		(BR202016008919)_x000D_ disposição construtiva aplicada em berço portátil com mosquiteiro. modelo de utildade de um berço portátil com mosquiteiro. trata-se de uma colchonete que se transforma em um berço portátil, com mosquiteiro transparente, protegendo o bebê contra insetos, pernilongos e principalmente contra o mosquito aedes aegypit, que é transmissor da dengue, zika e chikun gun ya. protege…
76979617	A61K-031/575_x000D_ Y02A-050/385_x000D_ Y02A-050/387_x000D_ Y02A-050/391_x000D_ Y02A-050/393	A61K-031/575_x000D_ A61P-031/12	Pharmaceuticals	CN201710044968	2017CN-0044968	2017-01-20	2017	(CN107028955)_x000D_ Application of 25-hydroxycholesterol in inhibiting flaviviruses	CHENG GENHONG_x000D_ QIN CHENGFENG_x000D_ XU ZHIHENG_x000D_ LI CHUNFENG_x000D_ DENG YONGQIANG_x000D_ WANG SHUO_x000D_ HUANG XINGYAO	(CN107028955)_x000D_ 程根宏_x000D_ 秦成峰_x000D_ 许执恒_x000D_ 李春峰_x000D_ 邓永强_x000D_ 王硕_x000D_ 黄星耀	(CN107028955)_x000D_ CHENG GENHONG_x000D_ QIN CHENGFENG_x000D_ XU ZHIHENG_x000D_ LI CHUNFENG_x000D_ DENG YONGQIANG_x000D_ WANG SHUO_x000D_ HUANG XINGYAO	INSTITUTE OF GENETICS & DEVELOPMENTAL BIOLOGY CAS_x000D_ INSTITUTE OF MICROBIOLOGY & EPIDEMIOLOGY ACADEMY OF MILITARY MEDICAL SCIENCES PR CHINA_x000D_ SUZHOU INSTITUTE OF SYSTEMS MEDICINE	INSTITUTE OF GENETICS & DEVELOPMENTAL BIOLOGY CAS_x000D_ INSTITUTE OF MICROBIOLOGY & EPIDEMIOLOGY ACADEMY OF MILITARY MEDICAL SCIENCES PR CHINA_x000D_ SUZHOU INSTITUTE OF SYSTEMS MEDICINE	SUZHOU INSTITUTE OF SYSTEMS MEDICINE_x000D_ INSTITUTE OF MICROBIOLOGY & EPIDEMIOLOGY ACADEMY OF MILITARY MEDICAL SCIENCES PR CHINA_x000D_ INSTITUTE OF GENETICS & DEVELOPMENTAL BIOLOGY CAS	(CN107028955)_x000D_ 苏州系统医学研究所_x000D_ 中国人民解放军军事医学科学院微生物流行病研究所_x000D_ 中国科学院遗传与发育生物学研究所			(CN107028955)_x000D_ SUZHOU INST OF SYSTEMS MEDICINE_x000D_ AMMS CHINA_x000D_ INST GENETICS & DEVELOPMENTAL BIOLOGY CAS		CN	ACADEMY;ACADEMY;ACADEMY	CN					PENDING	PENDING	ALIVE	ALIVE		2037-01-20	Y02A-050/385	A61K-031/575	1	0	0	0	1		Pharmaceuticals	(CN107028955)_x000D_ PREVENTION(100,18)_x000D_ FLAVIVIRUS(100,17)_x000D_ ZIKA VIRUS INFECTION(100,12)_x000D_ MICROCEPHALY(100,10)_x000D_ HYDROXYCHOLESTEROL(100,8)_x000D_ 25 HYDROXYCHOLESTEROL(100,7)_x000D_ FLAVIVIRUS INFECTION TREATMENT(100,7)_x000D_ INHIBITION(100,5)_x000D_ SUPPRESSING FIAVIVIRUSE(100,4)_x000D_ MEDICAMENT(100,3)_x000D_ INHIBITING FLAVIVIRUS(100,2)_x000D_ MEDICAMENT APPLICATION(1…	(CN107028955)_x000D_ The invention relates to the field of chemical drugs, and discloses an application of 25-hydroxycholesterol in inhibiting flaviviruses.Specifically, the invention discloses an application of the 25HC (25-hydroxycholesterol) in preparing medicines for preventing and/or treating flavivirus infection, in inhibiting the flaviviruses and in preparing medicines for preventing and/o…	(CN107028955)_x000D_ An object of the present invention is to overcome the deficiencies of the prior art, there is provided a novel use of 25HC, i.e. in the inhibition of the use of flaviviruses._x000D_ The results are shown Zika virus infection is possible to reduce P-H3 in the NPC in an amount, and the 25HC can restore this phenomenon, increase P-H3 expression level (FIG. 5F).	(CN107028955)_x000D_ 1.25-hydroxycholesterol in preparing for the prevention and/or treatment of a flavivirus infection of a medicament._x000D_ 2.25-hydroxycholesterol in inhibiting the use of flavivirus, particularly in vitro use of inhibiting flavivirus._x000D_ 3.25-hydroxycholesterol in preparing for the prevention and/or treating Zika virus infection caused by application of a medicament for …	(CN107028955)_x000D_ The present invention also discloses a pharmaceutical composition, comprising 25HC, at least one of the auxiliary agent is advantageous in suppressing fiaviviruses, and at least one pharmaceutically acceptable carrier._x000D_ The present invention relates to the field of pharmaceuticals, discloses a 25-hydroxycholesterol in the inhibition of the use of flaviviruses._x000D_ Th…
77018848	A01M-099/00_x000D_ A01M-2200/012_x000D_ B01F-013/00/49_x000D_ B01F-015/00/558_x000D_ B01F-2215/0052_x000D_ B63H-021/12_x000D_ B63H-2021/171_x000D_ C02F-001/34_x000D_ C02F-2103/007_x000D_ C02F-2201/009_x000D_ C02F-2203/008	A01M-099/00_x000D_ B01F-013/00_x000D_ B01F-015/00_x000D_ B63H-021/12_x000D_ C02F-001/34	Chemical engineering_x000D_ Environmental technology_x000D_ Other special machines_x000D_ Transport	US62/298,962P	2016US-62298962	2016-02-23	2016	(US20170239630)_x000D_ Compact Water Agitator for Pest Control	JOSHI ANANYA ASHISH		(US20170239630)_x000D_ Joshi Ananya Ashish	JOSHI ANANYA ASHISH						(US20170239630)_x000D_ Joshi Ananya Ashish ([US])	(US20170239630)_x000D_ Joshi Ananya Ashish	US	ID	US	(US20170239630)_x000D_ US	(US20170239630)_x000D_ NAME=Joshi Ananya Ashish , CITY=Matawan , STATE=NJ , COUNTRY=US _x000D_	(US20170239630)_x000D_ US	(US20170239630)_x000D_ NAME=Joshi Ananya Ashish , CITY=Matawan , STATE=NJ , COUNTRY=US _x000D_	PENDING	PENDING	ALIVE	ALIVE		2037-01-28	B01F-013/00/49	B01F-013/00	1	0	0	0	1		Chemical engineering_x000D_ Environmental technology_x000D_ Other special machines_x000D_ Transport	(US20170239630)_x000D_ AGITATION(100,19)_x000D_ SOLAR PANEL(100,8)_x000D_ WATER(100,7)_x000D_ COMPACT(100,6)_x000D_ PORTABLE(100,6)_x000D_ AERATOR STONE(100,5)_x000D_ MOSQUITO BREEDING(100,5)_x000D_ BATTERY BACKUP(100,3)_x000D_ BUBBLE(100,3)_x000D_ DENSE SURFACE WATER AGITATION(100,3)_x000D_ MOTOR(100,3)_x000D_ MOTOR VIBRATION(100,3)_x000D_ PLASTIC CASING(100,3)_x000D_ VASE(100,3)_x000D_ BACK VAL…	(US20170239630)_x000D_ Mosquitoes are vectors for many dangerous diseases such as Malaria, Dengue, Yellow Fever, West Nile, and those from Zika virus etc.Mosquito transmitted diseases occur mostly in tropical, developing countries and create public health crises due to lack of adequate resources and rapid transmission.Malaria took 429,000 lives in 2015 and the impending Zika crisis shows the need…	(US20170239630)_x000D_ Thus, there is a need for a solution to the abundant mosquito breeding grounds where conventional solutions to water agitation are not feasible and existing solutions to mosquito control are ineffective._x000D_ There is a video on Youtube that describes a Solar Scare-Mosquito Device, which is bulky, needs large power, and cannot handle diverse mosquito breeding grounds, suc…	(US20170239630)_x000D_ 1. A portable, compact water agitator for use indoors and outdoors in all systems of water such as a. Freshwater and saltwater water bodies b. Water tanks c. Water containers, such as bowls, tire tracks, vases etc. d. Lakes and ponds e. Traditional rain jars and open pools of water using solar panels and/or backup batteries_x000D_ 10. Water agitators containing solar panels…	(US20170239630)_x000D_ The main purpose of this invention is to provide a cost-effective, safer, and sustainable alternative for mosquito control._x000D_ Thus, this patent describes water agitators that are environmentally safe, efficient, and cost-effective.
77024960	A61K-039/12_x000D_ A61K-2039/53_x000D_ C12N-2770/24134_x000D_ C12N-2830/20_x000D_ Y02A-050/392	A61K-039/12	Pharmaceuticals	WOEP2016053398	2016WO-EP53398	2016-02-17	2016	(WO2017140905)_x000D_ Zika virus vaccine	PETSCH BENJAMIN_x000D_ JASNY EDITH_x000D_ GIRERD-CHAMBAZ YVES		(WO2017140905)_x000D_ PETSCH, Benjamin_x000D_ JASNY, Edith_x000D_ GIRERD-CHAMBAZ, Yves	CUREVAC_x000D_ SANOFI PASTEUR	CUREVAC_x000D_ SANOFI PASTEUR	CUREVAC_x000D_ SANOFI PASTEUR				(WO2017140905)_x000D_ CUREVAC AG ([DE])_x000D_ SANOFI PASTEUR SA ([FR])	(WO2017140905)_x000D_ CUREVAC AG; SANOFI PASTEUR SA	BR	CORPORATE;CORPORATE	WO	(WO2017140905)_x000D_ DE; FR	(WO2017140905)_x000D_ NAME=CUREVAC AG Paul-Ehrlich-Str. 15 72076 Tübingen , POSTCODE=72076 , COUNTRY=DE _x000D_ _x000D_ NAME=SANOFI PASTEUR SA 2, avenue Pont Pasteur 69367 Lyon Cedex 07 , POSTCODE=69367 , COUNTRY=FR _x000D_	(WO2017140905)_x000D_ DE; FR	(WO2017140905)_x000D_ NAME=PETSCH, Benjamin Hagellocher Weg 44 72070 Tübingen , POSTCODE=72070 , COUNTRY=DE _x000D_ _x000D_ NAME=JASNY, Edith Dorfstr. 70 72074 Tübingen , POSTCODE=72074 , COUNTRY=DE _x000D_ _x000D_ NAME=GIRERD-CHAMBAZ, Yves 22, chemin de la Pra 69510 Messimy , POSTCODE=69510 , COUNTRY=FR _x000D_	PENDING	(WO2017140905)_x000D_ PENDING_x000D_ (BR112018016755)_x000D_ PENDING	ALIVE	(WO2017140905)_x000D_ ALIVE_x000D_ (BR112018016755)_x000D_ ALIVE		(WO2017140905)_x000D_ 2019-08-17_x000D_ (BR112018016755)_x000D_ 2037-02-17	A61K-039/12	A61K-039/12	2	2	3	0	2	(WO2017140905)_x000D_ National States: AE AG AL AM AO AT AU AZ BA BB BG BH BN BR BW BY BZ CA CH CL CN CO CR CU CZ DE DJ DK DM DO DZ EC EE EG ES FI GB GD GE GH GM GT HN HR HU ID IL IN IR IS JP KE KG KH KN KP KR KW KZ LA LC LK LR LS LU LY MA MD ME MG MK MN MW MX MY MZ NA NG NI NO NZ OM PA PE PG PH PL PT QA RO RS RU RW SA SC SD SE SG SK SL SM ST SV SY TH TJ TM TN TR TT TZ UA UG US UZ VC VN ZA ZM ZW_…	Pharmaceuticals	(WO2017140905)_x000D_ ARTIFICIAL NUCLEIC ACID(100,141)_x000D_ ZIKA VIRUS NONSTRUCTURAL PROTEIN(100,12)_x000D_ ZIKA VIRUS PREMEMBRANE PROTEIN(86,11)_x000D_ ZIKA VIRUS CAPSID PROTEIN(71,29)_x000D_ ZIKA VIRUS MEMBRANE PROTEIN(65,11)_x000D_ FRAGMENT(48,136)_x000D_ ZIKA VIRUS POLYPROTEIN(45,43)_x000D_ ZIKA VIRUS ENVELOPE PROTEIN(33,10)_x000D_ ZIKA VIRUS VACCINE(31,5)_x000D_ ZIKA VIRUS(28,42)_x000D_ CO…	(WO2017140905)_x000D_ The present invention is directed to an artificial nucleic acid and to polypeptides suitable for use in treatment or prophylaxis of an infection with Zika virus or a disorder related to such an infection.In particular, the present invention concerns a Zika virus vaccine.The present invention is directed to an artificial nucleic acid, polypeptides, compositions and vaccines c…	(WO2017140905)_x000D_ This mechanism allows a small number of genes to generate a vast number of different antigen receptors, which are then uniquely expressed on each individual lymphocyte._x000D_ In humans, infection with Zika virus typically leads to dengue-like disease with symptoms such as fever, muscle aches, eye pain, prostration and maculopapular rash._x000D_ Innate immune system: The inn…	(WO2017140905)_x000D_ Claims 1. Artificial nucleic acid comprising at least one coding region encoding at least one polypeptide comprising at least one protein selected from the group consisting of Zika virus capsid protein (C), Zika virus premembrane protein (pr ), Zika virus pr protein (pr), Zika virus membrane protein (M), Zika virus envelope protein (E) and a Zika virus non-structural protein…	(WO2017140905)_x000D_ A further object of the present invention is the provision of a storage-stable Zika vaccine._x000D_ The object underlying the present invention is solved by the claimed subject-matter._x000D_ The present invention is directed to an artificial nucleic acid and to polypeptides suitable for use in treatment or prophylaxis of an infection with Zika virus or a disorder related to…	(WO2017140905)_x000D_ International Search Report [Examiner]_x000D_ -JERNEJ MLAKAR ET AL: "Zika Virus Associated with Microcephaly", NEW ENGLAND JOURNAL OF MEDICINE, THE - NEJM -, vol. 374, no. 10, 10 February 2016 (2016-02-10), pages 951 - 958, XP055314102, ISSN: 0028-4793, DOI: 10.1056/NEJMoa1600651CC=XP; XP055314102 (Cat. X,Y)_x000D_ -ENFISSI ANTOINE ET AL: "Zika virus genome from the Americas…
77026369	A61K-038/46/5_x000D_ Y02A-050/391	A61K-038/46_x000D_ A61P-031/14	Pharmaceuticals	US62/295,842P	2016US-62295842	2016-02-16	2016	(WO2017142807)_x000D_ Treatment or prevention of zika virus infections by administration of a ribonuclease	HODGE III THOMAS W		(WO2017142807)_x000D_ HODGE, III, Thomas W.	TAMIR BIOTECHNOLOGY	TAMIR BIOTECHNOLOGY	TAMIR BIOTECHNOLOGY				(WO2017142807)_x000D_ TAMIR BIOTECHNOLOGY, INC. ([US])	(WO2017142807)_x000D_ TAMIR BIOTECHNOLOGY, INC.	US	CORPORATE	US	(WO2017142807)_x000D_ US	(WO2017142807)_x000D_ NAME=TAMIR BIOTECHNOLOGY, INC. 12625 High Bluff Drive, Suite 213 San Diego, California 92130 , POSTCODE=92130 , COUNTRY=US _x000D_	(WO2017142807)_x000D_ US	(WO2017142807)_x000D_ NAME=HODGE, III, Thomas W. 122 River Bottom Way Athens, Georgia 30606 , POSTCODE=30606 , COUNTRY=US _x000D_	PENDING	PENDING	ALIVE	ALIVE		2019-08-16	A61K-038/46/5	A61K-038/46	1	0	6	0	1	(WO2017142807)_x000D_ National States: AE AG AL AM AO AT AU AZ BA BB BG BH BN BR BW BY BZ CA CH CL CN CO CR CU CZ DE DJ DK DM DO DZ EC EE EG ES FI GB GD GE GH GM GT HN HR HU ID IL IN IR IS JP KE KG KH KN KP KR KW KZ LA LC LK LR LS LU LY MA MD ME MG MK MN MW MX MY MZ NA NG NI NO NZ OM PA PE PG PH PL PT QA RO RS RU RW SA SC SD SE SG SK SL SM ST SV SY TH TJ TM TN TR TT TZ UA UG US UZ VC VN ZA ZM ZW_…	Pharmaceuticals	(WO2017142807)_x000D_ ZIKA VIRUS INFECTION(100,9)_x000D_ FUNCTIONAL DERIVATIVE(86,8)_x000D_ ZIKA VIRUS INFECTION PREVENTION(69,1)_x000D_ MAMMALIAN SUBJECT(61,6)_x000D_ RNASE(58,52)_x000D_ ZIKA FEVER(50,1)_x000D_ ZIKA VIRUS(45,12)_x000D_ RIBONUCLEASE ADMINISTRATION(45,2)_x000D_ STANDARD CYTOXICITY ASSAY(44,1)_x000D_ ZIKA VIRUS DISEASE(44,1)_x000D_ MILD FEVER(43,1)_x000D_ TRYPAN BLUE EXCLUSION(43,1…	(WO2017142807)_x000D_ The invention relates to treatment or prevention of Zika virus infections by administration of a ribonuclease.	(WO2017142807)_x000D_ Hence, there is a need to identify substances which can be used to efficiently treat or prevent Zika virus infections._x000D_ Ranpirnase is known to degrade tRNA very effectively (see Lin et al., Biochemical and Biophysical Research Communications 201 (1), 156 - 162 (1994))._x000D_ Because normal mammalian cells degrade approximately 80% of their tRNA as a natural process, t…	(WO2017142807)_x000D_ Claims 1. RNase of the RNase A superfamily or a functional derivative thereof for use in treating a Zika virus infection in a mammalian subject, wherein the RNase has an amino acid sequence selected from the group consisting of SEQ ID Nos. 1, 2, 3 and 4._x000D_ 4. RNase of the RNase A superfamily or a functional derivative thereof for use in preventing a Zika virus infection…	(WO2017142807)_x000D_ Accordingly, the present invention relates to an RNase of the RNase A superfamily or a functional derivative thereof for use in treating a Zika virus infection in a mammalian subject, wherein the RNase of the RNase A superfamily has an amino acid sequence selected from the group consisting of SEQ ID Nos. 1, 2, 3 and 4 and more preferably, it has the amino acid sequence accor…	(WO2017142807)_x000D_ International Search Report [Examiner]_x000D_ -VERONICA SIKKA ET AL: "The emergence of zika virus as a global health security threat: A review and a consensus statement of the INDUSEM Joint working Group (JWG)", JOURNAL OF GLOBAL INFECTIOUS DISEASES, vol. 8, no. 1, 1 January 2016 (2016-01-01), pages 3, XP055366881, ISSN: 0974-777X, DOI: 10.4103/0974-777X.176140CC=XP; XP05536…
77031306	A61K-038/17/09_x000D_ Y02A-050/391	A61K-038/17_x000D_ A61P-031/14	Pharmaceuticals	CN201611072312	2016CN-1072312	2016-11-29	2016	(CN107050425)_x000D_ Applications of novel antiviral protein C19orf66 in preparing medicines capable of resisting Zika virus	LI MENGFENG_x000D_ ZHU XUN_x000D_ HE ZHENJIAN_x000D_ WU JUEHENG_x000D_ LIN JIAJIE_x000D_ ZHANG SHIHAO_x000D_ HU YIWEN_x000D_ CHEN JIAHUI_x000D_ AN SHU_x000D_ DONG XINHUAI_x000D_ YU JIANCHEN_x000D_ YUAN JIE_x000D_ LI JUAN_x000D_ ZHU XIANZHONG_x000D_ GU JINMIN_x000D_ YANG YI	(CN107050425)_x000D_ 黎孟枫_x000D_ 朱勋_x000D_ 何振健_x000D_ 吴珏珩_x000D_ 林嘉捷_x000D_ 章诗豪_x000D_ 胡忆文_x000D_ 陈嘉慧_x000D_ 安树_x000D_ 董信怀_x000D_ 于暕辰_x000D_ 袁洁_x000D_ 李隽_x000D_ 朱显忠_x000D_ 古锦敏_x000D_ 杨毅	(CN107050425)_x000D_ LI MENGFENG_x000D_ ZHU XUN_x000D_ HE ZHENJIAN_x000D_ WU JUEHENG_x000D_ LIN JIAJIE_x000D_ ZHANG SHIHAO_x000D_ HU YIWEN_x000D_ CHEN JIAHUI_x000D_ AN SHU_x000D_ DONG XINHUAI_x000D_ YU JIANCHEN_x000D_ YUAN JIE_x000D_ LI JUAN_x000D_ ZHU XIANZHONG_x000D_ GU JINMIN_x000D_ YANG YI	SUN YAT SEN UNIVERSITY	SUN YAT SEN UNIVERSITY	SUN YAT SEN UNIVERSITY	(CN107050425)_x000D_ 中山大学			(CN107050425)_x000D_ SUN YAT-SEN UNIVERSITY		CN	ACADEMY	CN					PENDING	PENDING	ALIVE	ALIVE		2036-11-29	Y02A-050/391	A61K-038/17	1	0	0	0	1		Pharmaceuticals	(CN107050425)_x000D_ ORF(100,60)_x000D_ ANTIVIRAL PROTEIN(100,13)_x000D_ ANTI ZIKA VIRUS(100,7)_x000D_ MEDICAMENT MANUFACTURE(100,6)_x000D_ MEDICAMENT C MANUFACTURE(100,3)_x000D_ ANTIVIRAL PROTEIN IMMUNOTOXIN(100,2)_x000D_ INTERFERON STIMULATION(55,1)_x000D_ ZIKA VACCINE(50,1)_x000D_ HOST CELL PROLIFERATION(38,1)_x000D_ ANTIVIRAL DRUG(37,1)_x000D_ ZIKA VIRUS INFECTION(30,6)_x000D_ THERAPEUTIC AGE…	(CN107050425)_x000D_ The invention discloses applications of novel antiviral protein C19orf66 in preparing medicines capable of resisting Zika virus.For the novel antiviral protein C19orf66, through interferon stimulation and Zika virus infection, the increase of the expression level of novel antiviral protein C19orf66 can be effectively stimulated, meanwhile, the C19orf66 with stable and high ex…	(CN107050425)_x000D_ As compared with the prior art, the present invention has the following advantages:_x000D_ At present, there is no specific Zika vaccines and anti-viral drugs on the market, therefore, to develop Zika virus-specific laboratory diagnosis detection means for solving the development of effective vaccines and specific therapeutic agents work has become the current key scientific …	(CN107050425)_x000D_ 1. Antiviral protein immunotoxin C19orf66 anti-zika virus for the manufacture of a medicament.	(CN107050425)_x000D_ An object of the present invention according to the shortcomings of the prior art, there is provided a novel antiviral protein C19orf66 anti-zika virus in the manufacture of a medicament._x000D_ An object of the present invention is achieved through the following technical scheme: The present invention provides an anti-viral protein C19orf66 anti-zika virus in the manufacture…
77094194	C12N-2770/24122_x000D_ G01N-033/569_x000D_ G01N-2333/185_x000D_ G01N-2469/20_x000D_ Y02A-050/53_x000D_ Y02A-050/60	A61K-039/12_x000D_ C07K-014/08_x000D_ G01N-033/569	Analysis of biological materials_x000D_ Pharmaceuticals	EP16000422	2016EP-0000422	2016-02-22	2016	(WO2017144174)_x000D_ An immunoassay for the diagnosis of viral infections	STEINHAGEN KATJA_x000D_ DEERBERG ANDREA_x000D_ LATTWEIN ERIK_x000D_ RADZIMSKI CHRISTIANE_x000D_ BÖTHFÜR JANA		(WO2017144174)_x000D_ STEINHAGEN, Katja_x000D_ DEERBERG, Andrea_x000D_ LATTWEIN, Erik_x000D_ RADZIMSKI, Christiane_x000D_ BÖTHFÜR, Jana	EUROIMMUN MEDIZINISCHE LABORDIAGNOSTIKA	EUROIMMUN MEDIZINISCHE LABORDIAGNOSTIKA	EUROIMMUN MEDIZINISCHE LABORDIAGNOSTIKA				(WO2017144174)_x000D_ EUROIMMUN MEDIZINISCHE LABORDIAGNOSTIKA AG ([DE])_x000D_ (WO2017144173)_x000D_ EUROIMMUN MEDIZINISCHE LABORDIAGNOSTIKA AG ([DE])_x000D_ (SG11201805496P)_x000D_ EUROIMMUN MEDIZINISCHE LABORDIAGNOSTIKA AG	(WO2017144174)_x000D_ EUROIMMUN MEDIZINISCHE LABORDIAGNOSTIKA AG_x000D_ (WO2017144173)_x000D_ EUROIMMUN MEDIZINISCHE LABORDIAGNOSTIKA AG_x000D_ (SG11201805496P)_x000D_ EUROIMMUN MEDIZINISCHE LABORDIAGNOSTIKA AG	BR	CORPORATE	EP	(WO2017144174)_x000D_ DE_x000D_ (WO2017144173)_x000D_ DE_x000D_	(WO2017144174)_x000D_ NAME=EUROIMMUN MEDIZINISCHE LABORDIAGNOSTIKA AG Seekamp 31 23560 Lübeck , COUNTRY=DE _x000D_ _x000D_ (WO2017144173)_x000D_ NAME=EUROIMMUN MEDIZINISCHE LABORDIAGNOSTIKA AG Seekamp 31 23560 Lübeck , COUNTRY=DE _x000D_ _x000D_ (SG11201805496P)_x000D_ NAME=EUROIMMUN MEDIZINISCHE LABORDIAGNOSTIKA AG DE _x000D_	(WO2017144174)_x000D_ DE	(WO2017144174)_x000D_ NAME=STEINHAGEN, Katja Kranichweg 1 23627 Groß Grönau , COUNTRY=DE _x000D_ _x000D_ NAME=DEERBERG, Andrea An der Münze 5 23627 Groß Grönau , COUNTRY=DE _x000D_ _x000D_ NAME=LATTWEIN, Erik Kaninchenbergweg 1e 23564 Lübeck , COUNTRY=DE _x000D_ _x000D_ NAME=RADZIMSKI, Christiane Buchenweg 83 23858 Reinfeld , COUNTRY=DE _x000D_ _x000D_ NAME=BÖTHFÜR, Jana Waschpauhl 3 19217 Schlag…	PENDING	(WO2017144173)_x000D_ PENDING_x000D_ (WO2017144174)_x000D_ PENDING_x000D_ (BR112018014122)_x000D_ PENDING_x000D_ (SG11201805496P)_x000D_ PENDING	ALIVE	(WO2017144173)_x000D_ ALIVE_x000D_ (WO2017144174)_x000D_ ALIVE_x000D_ (BR112018014122)_x000D_ ALIVE_x000D_ (SG11201805496P)_x000D_ ALIVE		(WO2017144173)_x000D_ 2019-08-24_x000D_ (WO2017144174)_x000D_ 2019-08-24_x000D_ (BR112018014122)_x000D_ 2037-02-22_x000D_ (SG11201805496P)_x000D_ 2037-02-22	G01N-033/569	G01N-033/569	3	0	3	0	4	(WO2017144174)_x000D_ National States: AE AG AL AM AO AT AU AZ BA BB BG BH BN BR BW BY BZ CA CH CL CN CO CR CU CZ DE DJ DK DM DO DZ EC EE EG ES FI GB GD GE GH GM GT HN HR HU ID IL IN IR IS JP KE KG KH KN KP KR KW KZ LA LC LK LR LS LU LY MA MD ME MG MK MN MW MX MY MZ NA NG NI NO NZ OM PA PE PG PH PL PT QA RO RS RU RW SA SC SD SE SG SK SL SM ST SV SY TH TJ TM TN TR TT TZ UA UG US UZ VC VN ZA ZM ZW_…	Analysis of biological materials_x000D_ Pharmaceuticals	(WO2017144174)_x000D_ DIAGNOSTICALLY USEFUL CARRIER(100,51)_x000D_ ZIKA VIRUS(100,32)_x000D_ RECOMBINANT POLYPEPTIDE(100,3)_x000D_ ZIKA VIRUS INFECTION(96,20)_x000D_ IGA CLASS ANTIBODY(82,23)_x000D_ FLAVIVIRUS DIAGNOSIS(80,1)_x000D_ DIAGNOSTIC ASSAY OVERCOMING(79,1)_x000D_ DIAGNOSTICALLY RELIABLE TEST(75,2)_x000D_ INFECTION DIAGNOSIS(73,1)_x000D_ ZIKA VIRUS ENVELOPE GLYCOPROTEIN(72,3)_x000D_ FLAV…	(WO2017144174)_x000D_ The present inventions relates to a polypeptide, preferably a dimer and/or hexamer thereof, more preferably a dimer, comprising a sequence selected from the group comprising SEQ ID NO1, SEQ ID NO2, SEQ ID NO3, SEQ ID NO4, SEQ ID NO5, SEQ ID NO6, SEQ ID NO7, SEQ ID NO8, SEQ ID NO19 and SEQ ID NO9 or a variant thereof, preferably SEQ ID NO1 or a variant thereof, for the diagno…	(WO2017144174)_x000D_ Adjuvants are added to vaccines to simulate the production of antibodies against the vaccine to make it more effective._x000D_ Therefore, the problem underlying the present invention is to provide a diagnostic assay overcoming any shortcomings associated with state of the art assays for the diagnosis of flaviviruses such as the Zika virus, in particular those based on the de…	(WO2017144174)_x000D_ Claims 1. A recombinant polypeptide comprising SEQ ID N01 or a variant thereof, which polypeptide is a monomer, dimer or hexamer._x000D_ A diagnostically useful carrier comprising a means for specifically capturing an antibody to SEQ ID N01 in a sample from a subject, wherein the diagnostic device is preferably selected from the group comprising bead, preferably a paramagnet…	(WO2017144174)_x000D_ In a first aspect, the problem underlying the present invention is solved by a polypeptide comprising a sequence selected from the group comprising SEQ ID N01, SEQ ID N02, SEQ ID N03, SEQ ID N04, SEQ ID N05, SEQ ID N06, SEQ ID N07, SEQ ID N08, SEQ ID N019 and SEQ ID N09 or a variant thereof, preferably SEQ ID N01 or a variant thereof, preferably a dimer and/or hexamer, more …	(WO2017144174)_x000D_ International Search Report [Examiner]_x000D_ -CHARREL RN ET AL: "State of knowledge on Zika virus for an adequate laboratory response", BULL WORLD HEALTH ORGAN, 10 February 2016 (2016-02-10), pages 1 - 29, XP055276698, Retrieved from the Internet <URL:http://www.who.int/bulletin/online_first/16-171207.pdf> [retrieved on 20160531]CC=XP; XP055276698 (Cat. X,Y,I)_x000D_ -EUROI…
77096378	A61K-039/12_x000D_ A61K-2039/53_x000D_ C07K-014/005_x000D_ C12N-015/62_x000D_ C12N-2770/24122_x000D_ C12N-2770/24134_x000D_ C12N-2770/24171_x000D_ Y02A-050/392	A61K-039/12_x000D_ A61P-031/14_x000D_ C07K-014/18_x000D_ C12N-015/40_x000D_ C12N-015/62	Pharmaceuticals	US62/300,030P	2016US-62300030	2016-02-25	2016	(WO2017147458)_x000D_ Novel vaccines against zika virus	MUTHUMANI KARUPPIAH_x000D_ WEINER DAVID		(WO2017147458)_x000D_ MUTHUMANI, Karuppiah_x000D_ WEINER, David	UNIVERSITY OF PENNSYLVANIA	UNIVERSITY OF PENNSYLVANIA	UNIVERSITY OF PENNSYLVANIA				(WO2017147458)_x000D_ THE TRUSTEES OF THE UNIVERSITY OF PENNSYLVANIA ([US])	(WO2017147458)_x000D_ THE TRUSTEES OF THE UNIVERSITY OF PENNSYLVANIA	US	ACADEMY	US	(WO2017147458)_x000D_ US	(WO2017147458)_x000D_ NAME=THE TRUSTEES OF THE UNIVERSITY OF PENNSYLVANIA 3160 Chestnut Street, Suite 200 Philadelphia, PA 19104 , POSTCODE=19104 , COUNTRY=US _x000D_	(WO2017147458)_x000D_ US	(WO2017147458)_x000D_ NAME=MUTHUMANI, Karuppiah 52 Ivy Lane Cherry Hill, NJ 08002 , POSTCODE=08002 , COUNTRY=US _x000D_ _x000D_ NAME=WEINER, David 717 Beacom Lane Merion, PA 19066 , POSTCODE=19066 , COUNTRY=US _x000D_	PENDING	PENDING	ALIVE	ALIVE		2019-08-25	A61K-039/12	A61K-039/12	1	0	4	0	1	(WO2017147458)_x000D_ National States: AE AG AL AM AO AT AU AZ BA BB BG BH BN BR BW BY BZ CA CH CL CN CO CR CU CZ DE DJ DK DM DO DZ EC EE EG ES FI GB GD GE GH GM GT HN HR HU ID IL IN IR IS JP KE KG KH KN KP KR KW KZ LA LC LK LR LS LU LY MA MD ME MG MK MN MW MX MY MZ NA NG NI NO NZ OM PA PE PG PH PL PT QA RO RS RU RW SA SC SD SE SG SK SL SM ST SV SY TH TJ TM TN TR TT TZ UA UG US UZ VC VN ZA ZM ZW_…	Pharmaceuticals	(WO2017147458)_x000D_ CONSENSUS ZIKA ANTIGEN(100,22)_x000D_ ISOLATED NUCLEIC ACID MOLECULE(100,12)_x000D_ IGE SIGNAL PEPTIDE(68,25)_x000D_ HIND LIMB PARALYSIS(61,5)_x000D_ HIND LIMB KNUCKLE WALKING(57,3)_x000D_ FRAGMENT(41,28)_x000D_ ZIKA VIRUS(39,14)_x000D_ ENCODING NUCLEIC ACID(36,12)_x000D_ DNA PLASMID VACCINE(34,29)_x000D_ DECREASED MOBILITY(31,4)_x000D_ CLINICAL SCORE(29,4)_x000D_ MILD SYMPT…	(WO2017147458)_x000D_ An aspect of the present invention is related to nucleic acid constructs capable of expressing a Zika antigen that elicits an immune response in a mammal against Zika virus, and methods of use thereof.Additionally, there are DNA plasmid vaccines capable of generating in a mammal an immune response against a Zika virus, comprising a DNA plasmid and a pharmaceutically acceptab…	(WO2017147458)_x000D_ However, it is necessary that these elements are functional in the mammals to whom the nucleic acid construct is administered._x000D_ It is necessary that these elements be operable linked to the sequence that encodes the desired proteins and that the regulatory elements are operably in the individual to whom they are administered._x000D_ Other genes which may be useful adju…	(WO2017147458)_x000D_ CLAIMS We claim: 1. An isolated nucleic acid molecule wherein the nucleic acid molecule encodes a consensus Zika antigen._x000D_ 11. A composition comprising a nucleic acid molecule, wherein the nucleic acid molecule encodes a consensus Zika antigen.	(WO2017147458)_x000D_ Another aspect of the present invention provides DNA plasmid vaccines that are capable of generating in a mammal an immune response against a Zika virus._x000D_ One aspect of the present invention provides nucleic acid constructs capable of expressing a polypeptide that elicits an immune response in a mammal against Zika virus._x000D_ The present invention relates to Zika va…	(WO2017147458)_x000D_ International Search Report [Examiner]_x000D_ -DIKHIT ET AL.: "Computational prediction and analysis of potential antigenic CTL epitopes in Zika virus: A first step towards vaccine development", INFECT GENET EVOL, vol. 45, 31 August 2016 (2016-08-31), pages 187 - 197, XP029816628CC=XP; XP029816628 (Cat. P,A)_x000D_ -DAR ET AL.: "Prediction of promiscuous T- cell epitopes in …
77103557	G01N-033/533_x000D_ G01N-033/543/13_x000D_ G01N-033/558_x000D_ G01N-033/569/83_x000D_ G01N-033/577_x000D_ G01N-033/68	G01N-033/533_x000D_ G01N-033/543_x000D_ G01N-033/558_x000D_ G01N-033/569_x000D_ G01N-033/577_x000D_ G01N-033/68	Analysis of biological materials	CN201710157928	2017CN-0157928	2017-03-16	2017	(CN107102144)_x000D_ Fluorescence quantitative immunochromatography test paper strip for fast detecting zika virus NS1 protein and manufacturing method thereof	ZHENG ZHI_x000D_ YU HONGBO	(CN107102144)_x000D_ 郑志_x000D_ 于洪波	(CN107102144)_x000D_ ZHENG ZHI_x000D_ YU HONGBO	SHENZHEN ZIJIAN BIOTECH	SHENZHEN ZIJIAN BIOTECH	SHENZHEN ZIJIAN BIOTECH	(CN107102144)_x000D_ 深圳市梓健生物科技有限公司			(CN107102144)_x000D_ SHENZHEN ZIJIAN BIOLOGY TECHNOLOGY CO., LTD.		CN	CORPORATE	CN					PENDING	PENDING	ALIVE	ALIVE		2037-03-16	G01N-033/68	G01N-033/68	1	0	6	0	1		Analysis of biological materials	(CN107102144)_x000D_ FLUORESCENT MICROSPHERE(100,33)_x000D_ PROTEIN(100,33)_x000D_ COATING FILM(100,20)_x000D_ SAMPLE PAD(100,17)_x000D_ ANTI CHICKEN ANTIBODY(100,15)_x000D_ PAD(100,15)_x000D_ BASE PLATE(100,11)_x000D_ MONOCLONAL ANTIBODY(100,10)_x000D_ IMMUNOCHROMATOGRAPHIC STRIP(100,9)_x000D_ STRIP(100,8)_x000D_ RAPID DETECTION(100,6)_x000D_ FLUORESCENCE PROTEIN(100,5)_x000D_ WATER ABSORBING SH…	(CN107102144)_x000D_ The invention discloses a fluorescence quantitative immunochromatography test paper strip for fast detecting zika virus NS1 protein and a manufacturing method thereof.The test paper strip comprises a bottom plate, wherein a sample pad, a combination pad, a covering film and water suction paper are sequentially arranged on the bottom plate and are in sequential lap joint; a fl…	(CN107102144)_x000D_ NS1 protein Zika virus detection target substance in the present invention, the protein can be detected in human early stages of infection, while IgG and the detection of IgM antibody people against the village card virus 7 days after infection is required, the present invention has the advantages of earlier detection of Zika virus._x000D_ In addition, the present invention d…	(CN107102144)_x000D_ 1. A rapid detection of the NS1 protein fluorescence a quantitative immunochromatographic Zika virus test strip, characterized in, includes a base plate, in this order on the base plate is provided with a sample pad, conjugate pad, the coating film and the water-absorbing sheet, and the sample pad, conjugate pad, the coating film and the water-absorbing sheet sequentially ove…	(CN107102144)_x000D_ The present invention discloses a method for rapid detection of protein NS1 Zika virus fluorometric quantitation of the immunochromatographic strip and its making method, a dip stick comprises a base plate, in this order on the base plate is provided with a sample pad, conjugate pad, and the water-absorbing coating film and which are in turn overlapped; the conjugate pad cont…
77146387	A61K-039/12_x000D_ A61K-2039/5258_x000D_ A61K-2039/53_x000D_ C07K-014/005_x000D_ C07K-016/10_x000D_ C12N-007/00_x000D_ C12N-2770/24122_x000D_ C12N-2770/24123_x000D_ C12N-2770/24134_x000D_ C12N-2770/24151_x000D_ G01N-033/569/83_x000D_ G01N-2333/183_x000D_ G01N-2333/185_x000D_ Y02A-050/392	A61K-035/76_x000D_ A61K-039/12_x000D_ A61P-031/14_x000D_ C07K-014/005_x000D_ C07K-016/10_x000D_ C12N-007/00_x000D_ C12N-007/04_x000D_ C12N-015/00_x000D_ G01N-033/569	Analysis of biological materials_x000D_ Pharmaceuticals	US62/303,571P	2016US-62303571	2016-03-04	2016	(US20170252425)_x000D_ Zika virus virus like particle	AKAHATA WATARU_x000D_ UENO RYUJI		(US20170252425)_x000D_ AKAHATA Wataru_x000D_ UENO Ryuji	VLP THERAPEUTICS	VLP THERAPEUTICS	VLP THERAPEUTICS		AKAHATA WATARU; FROM 2017-03-03 TO 2017-03-23_x000D_ UENO RYUJI; FROM 2017-03-03 TO 2017-03-24_x000D_ VLP THERAPEUTICS; FROM 2017-03-23	(US20170252425)_x000D_ VLP THERAPEUTICS DELAWARE; EFFD=2017-04-04	(US20170252425)_x000D_ VLP Therapeutics, LLC ([US])_x000D_ (WO2017150683)_x000D_ VLP THERAPEUTICS, LLC ([US])	(US20170252425)_x000D_ VLP Therapeutics, LLC_x000D_ (WO2017150683)_x000D_ VLP THERAPEUTICS, LLC	JP	CORPORATE	US	(US20170252425)_x000D_ US_x000D_ (WO2017150683)_x000D_ US	(US20170252425)_x000D_ NAME=VLP Therapeutics, LLC , CITY=Wilmington , STATE=DE , COUNTRY=US , ATYP=US Company _x000D_ _x000D_ (WO2017150683)_x000D_ NAME=VLP THERAPEUTICS, LLC 1209 Orange Street, Wilmington, Delaware 19801 , POSTCODE=19801 , COUNTRY=US _x000D_	(US20170252425)_x000D_ US	(US20170252425)_x000D_ NAME=AKAHATA Wataru , CITY=Kensington , STATE=MD , COUNTRY=US _x000D_ _x000D_ NAME=UENO Ryuji , CITY=Easton , STATE=MD , COUNTRY=US _x000D_	PENDING	(US20170252425)_x000D_ PENDING_x000D_ (WO2017150683)_x000D_ PENDING	ALIVE	(US20170252425)_x000D_ ALIVE_x000D_ (WO2017150683)_x000D_ ALIVE		(US20170252425)_x000D_ 2037-03-03_x000D_ (WO2017150683)_x000D_ 2019-09-04	A61K-039/12	C12N-007/04	2	0	6	1	2	(WO2017150683)_x000D_ National States: AE AG AL AM AO AT AU AZ BA BB BG BH BN BR BW BY BZ CA CH CL CN CO CR CU CZ DE DJ DK DM DO DZ EC EE EG ES FI GB GD GE GH GM GT HN HR HU ID IL IN IR IS JP KE KG KH KN KP KR KW KZ LA LC LK LR LS LU LY MA MD ME MG MK MN MW MX MY MZ NA NG NI NO NZ OM PA PE PG PH PL PT QA RO RS RU RW SA SC SD SE SG SK SL SM ST SV SY TH TJ TM TN TR TT TZ UA UG US UZ VC VN ZA ZM ZW_…	Analysis of biological materials_x000D_ Pharmaceuticals	(US20170252425)_x000D_ VIRUS LIKE PARTICLE(100,54)_x000D_ VIRUS(100,3)_x000D_ ISOLATED NUCLEIC ACID MOLECULE(100,2)_x000D_ ENVELOPE PROTEIN(99,20)_x000D_ ZIKA VIRUS STRUCTURAL PROTEIN(94,29)_x000D_ ZIKA VIRUS INFECTION(73,17)_x000D_ ANTIBODY NEUTRALIZATION(46,2)_x000D_ ZIKA VIRUS INFECTION DISEASE(46,1)_x000D_ NUCLEIC ACID MOLECULE(44,16)_x000D_ MAMMAL(42,13)_x000D_ ZIKA VIRUS(41,19)_x000D_ SEQUE…	(US20170252425)_x000D_ Provided is a virus like particle comprising one or more zika virus structural proteins, and a composition or vaccine comprising thereof, its use in the prevention or treatment of zika virus disease.The zika virus structural protein contains at least one amino acid alteration in the envelope protein.	(US20170252425)_x000D_ [0057] In the fifth aspect, a method of treating a disease or condition caused by zika virus infection such as zika fever in a subject, wherein the virus like particle provided in the first aspect, the nucleotide molecule provided in the second aspect, or the composition provided in the third aspect is administered to the subject.	(US20170252425)_x000D_ 1. A virus like particle comprising one or more zika virus structural proteins including envelope protein, wherein the envelope protein of the zika virus structural protein contains at least one alteration in the_x000D_ 8. An isolated nucleic acid molecule consisting of a nucleotide sequence which has a sequence identity of 90% or more with a nucleotide sequence represented…	(US20170252425)_x000D_ [0010] In a first aspect, the present application provides a virus like particle comprising one or more zika virus structural proteins including the envelope protein, wherein the envelope protein of the zika virus structural protein contains at least one alteration in the amino acid sequence. [0011] In a second aspect, the present application provides a nucleic acid molecul…	(US20170252425)_x000D_ Examiner references_x000D_ -Recombinant dengue virus-like particles from Pichia pastoris: efficient production and immunological properties, Vir. Genes, 2010; 40:53-59 (Cat. 103)_x000D_ (WO2017150683)_x000D_ International Search Report [Examiner]_x000D_ -KONISHI E. ET AL., vol. 26, 2015, pages 27 - 36 (Cat. X,Y,A)_x000D_ -DATABASE Nucleotide [O] 23 November 2010 (2010-11-23…
77150455	A61K-2039/505_x000D_ A61K-2039/54_x000D_ A61P-031/14_x000D_ C07K-016/06_x000D_ C07K-016/10/81_x000D_ Y02A-050/392	A61K-039/395_x000D_ A61K-039/42	Pharmaceuticals	US62/302,842P	2016US-62302842	2016-03-03	2016	(WO2017149528)_x000D_ Intrauterine therapy and prophylaxis of infectious diseases in a mammal fetus	SCHENKER ERAN_x000D_ SAGIV YUVAL		(WO2017149528)_x000D_ SCHENKER, Eran_x000D_ SAGIV, Yuval	KAMADA	KAMADA	KAMADA				(WO2017149528)_x000D_ KAMADA LTD. ([IL])	(WO2017149528)_x000D_ KAMADA LTD.	IL	CORPORATE	US	(WO2017149528)_x000D_ IL	(WO2017149528)_x000D_ NAME=KAMADA LTD. 7 Sapir Street Kiryat Weizmann Science Park 7403630 Ness Ziona , POSTCODE=7403630 , COUNTRY=IL _x000D_	(WO2017149528)_x000D_ IL	(WO2017149528)_x000D_ NAME=SCHENKER, Eran 10 Shafer CT, P.O.B. 48529 6148402 Tel Aviv , POSTCODE=6148402 , COUNTRY=IL _x000D_ _x000D_ NAME=SAGIV, Yuval 7 Smadar St. 7041805 Gedera , POSTCODE=7041805 , COUNTRY=IL _x000D_	PENDING	PENDING	ALIVE	ALIVE		2019-09-03	C07K-016/10/81	A61K-039/42	1	0	1	0	1	(WO2017149528)_x000D_ National States: AE AG AL AM AO AT AU AZ BA BB BG BH BN BR BW BY BZ CA CH CL CN CO CR CU CZ DE DJ DK DM DO DZ EC EE EG ES FI GB GD GE GH GM GT HN HR HU ID IL IN IR IS JP KE KG KH KN KP KR KW KZ LA LC LK LR LS LU LY MA MD ME MG MK MN MW MX MY MZ NA NG NI NO NZ OM PA PE PG PH PL PT QA RO RS RU RW SA SC SD SE SG SK SL SM ST SV SY TH TJ TM TN TR TT TZ UA UG US UZ VC VN ZA ZM ZW_…	Pharmaceuticals	(WO2017149528)_x000D_ DISEASE(100,18)_x000D_ FLAVIVIRUS GENUS VIRUS(100,18)_x000D_ MAMMAL FETUS(100,9)_x000D_ MAMMAL FETUS PASSIVE IMMUNIZATION(99,8)_x000D_ VARICELLA ZOSTER VIRUS(85,1)_x000D_ ZIKA VIRUS(64,28)_x000D_ FETUS INTRAMUSCULAR ADMINISTRATION(53,1)_x000D_ INTRAFETUS ADMINISTRATION(52,9)_x000D_ MEASLES VIRUS(50,1)_x000D_ VIRUS FAMILY FLAVIVIRIDAE MEMBER(50,1)_x000D_ HARMFUL VIRAL INFECTI…	(WO2017149528)_x000D_ Provided are methods for prevention or treatment of an infection caused by a virus of Flavivirus genus, and in particular by Zika virus disease in mammal fetus.An example for such a treatment is a passive immunization of the fetus by an antibody, and in particular polyclonal antibody or a fragment thereof.Other examples include intrauterine administration of an active compou…	(WO2017149528)_x000D_ Macrophages are the most efficient phagocytes and can phagocytose substantial numbers of bacteria or other cells or microbes._x000D_ Thus, it is necessary to develop polyclonal antibody that provides immunity to all four serotypes._x000D_ However, the group of "other" pathogens, including viruses now known to cause congenital infections, has expanded to include parvovirus B1…	(WO2017149528)_x000D_ CLAIMS 1. A pharmaceutical composition comprising an effective amount of an active compound, for use in treatment of a disease in a mammal fetus caused by a virus of Flavivirus genus, wherein said active compound is capable of treating the disease and said pharmaceutical composition is administered intrauterinally._x000D_ 23. A method of treatment of a disease caused by a vi…	(WO2017149528)_x000D_ It is related to dengue, yellow fever, West Nile and Japanese encephalitis, viruses that are also members of the virus family Flaviviridae._x000D_ [0030] The present invention discloses that non-maternal passive immunization of a fetus is beneficial in the prevention and/or treatment of intrauterine infections that endanger the fetus. [0031] According to one aspect, the pres…	(WO2017149528)_x000D_ International Search Report [Examiner]_x000D_ -GIOVANNI NIGRO ET AL.: "Passive immunization during pregnancy for congenital cytomegalovirus infection", THE NEW ENGLAND JOURNAL OF MEDICINE, vol. 353, no. 13, 31 December 2005 (2005-12-31), pages 1350 - 1362, XP055414466CC=XP; XP055414466 (Cat. A)_x000D_ -SAPPARAPU GOPAL ET AL.: "Neutralizing human antibodies prevent Zika virus…
77204913	C12Q-001/68/18_x000D_ C12Q-001/70/1_x000D_ C12Q-2600/158	C12Q-001/68_x000D_ C12Q-001/70	Biotechnology	US62/306,803P	2016US-62306803	2016-03-11	2016	(US20170260596)_x000D_ Compositions and methods for detection of zika virus	DUGENNY SLAV_x000D_ FISS ELLEN H_x000D_ FONG JEFFERY_x000D_ HEIL MARINTHA_x000D_ SPIER EUGENE_x000D_ SUN JINGTAO		(US20170260596)_x000D_ Dugenny Slav_x000D_ Fiss Ellen H._x000D_ Fong Jeffery_x000D_ Heil Marintha_x000D_ Spier Eugene_x000D_ Sun Jingtao	HOFFMANN LA ROCHE_x000D_ ROCHE DIAGNOSTICS_x000D_ ROCHE MOLECULAR SYSTEMS	HOFFMANN LA ROCHE_x000D_ ROCHE DIAGNOSTICS_x000D_ ROCHE MOLECULAR SYSTEMS	ROCHE DIAGNOSTICS_x000D_ HOFFMANN LA ROCHE_x000D_ ROCHE MOLECULAR SYSTEMS				(US20170260596)_x000D_ Roche Molecular Systems, Inc. ([US])_x000D_ (WO2017153566)_x000D_ ROCHE DIAGNOSTICS GMBH ([DE])_x000D_ F. HOFFMANN-LA ROCHE AG ([CH])_x000D_ ROCHE MOLECULAR SYSTEMS, INC. ([US])	(US20170260596)_x000D_ Roche Molecular Systems, Inc._x000D_ (WO2017153566)_x000D_ F. HOFFMANN-LA ROCHE AG; ROCHE DIAGNOSTICS GMBH; ROCHE MOLECULAR SYSTEMS, INC.	US	CORPORATE	US	(US20170260596)_x000D_ US_x000D_ (WO2017153566)_x000D_ DE; CH; US	(US20170260596)_x000D_ NAME=Roche Molecular Systems, Inc. , CITY=Pleasanton , STATE=CA , COUNTRY=US _x000D_ _x000D_ (WO2017153566)_x000D_ NAME=ROCHE DIAGNOSTICS GMBH Sandhofer Straße 116 68305 Mannheim , POSTCODE=68305 , COUNTRY=DE _x000D_ _x000D_ NAME=F. HOFFMANN-LA ROCHE AG Grenzacherstrasse 124 4070 Basel , POSTCODE=4070 , COUNTRY=CH _x000D_ _x000D_ NAME=ROCHE MOLECULAR SYSTEMS, INC. 4300 Haci…	(US20170260596)_x000D_ US	(US20170260596)_x000D_ NAME=Dugenny Slav , CITY=San Leandro , STATE=CA , COUNTRY=US _x000D_ _x000D_ NAME=Fiss Ellen H. , CITY=Albany , STATE=CA , COUNTRY=US _x000D_ _x000D_ NAME=Fong Jeffery , CITY=Lafayette , STATE=CA , COUNTRY=US _x000D_ _x000D_ NAME=Heil Marintha , CITY=Danville , STATE=CA , COUNTRY=US _x000D_ _x000D_ NAME=Spier Eugene , CITY=Los Altos , STATE=CA , COUNTRY=US _x000D_ _x000D_ N…	PENDING	(US20170260596)_x000D_ PENDING_x000D_ (WO2017153566)_x000D_ PENDING	ALIVE	(US20170260596)_x000D_ ALIVE_x000D_ (WO2017153566)_x000D_ ALIVE		(US20170260596)_x000D_ 2037-03-10_x000D_ (WO2017153566)_x000D_ 2019-09-11	C12Q-001/70/1	C12Q-001/70	2	0	17	0	2	(WO2017153566)_x000D_ National States: AE AG AL AM AO AT AU AZ BA BB BG BH BN BR BW BY BZ CA CH CL CN CO CR CU CZ DE DJ DK DM DO DZ EC EE EG ES FI GB GD GE GH GM GT HN HR HU ID IL IN IR IS JP KE KG KH KN KP KR KW KZ LA LC LK LR LS LU LY MA MD ME MG MK MN MW MX MY MZ NA NG NI NO NZ OM PA PE PG PH PL PT QA RO RS RU RW SA SC SD SE SG SK SL SM ST SV SY TH TJ TM TN TR TT TZ UA UG US UZ VC VN ZA ZM ZW_…	Biotechnology	(US20170260596)_x000D_ PRIMER(100,95)_x000D_ ZIKA VIRUS(100,47)_x000D_ DETECTABLE PROBE(100,46)_x000D_ NUCLEIC ACID SEQUENCE(100,21)_x000D_ KIT(100,14)_x000D_ ZIKA VIRUS DETECTION(100,13)_x000D_ VIRUS(100,10)_x000D_ COMPLEMENT(53,53)_x000D_ OLIGONUCLEOTIDE SEQUENCE(52,12)_x000D_ DONOR FLUORESCENT MOIETY(50,23)_x000D_ ZIKA VIRUS ABSENCE(39,18)_x000D_ PROBE TARGETING ZIKA VIRUS(30,1)_x000D_ BLACK H…	(US20170260596)_x000D_ Methods for the rapid detection of the presence or absence of Zika virus in a biological or non-biological sample are described.The methods can include performing an amplifying step, a hybridizing step, and a detecting step.Furthermore, primers and probes targeting Zika virus arid kits are provided that are designed for the detection of Zika virus.	(US20170260596)_x000D_ Other modified nucleotide substitutions may alter the stability of the oligonucleotide, or provide other desirable features._x000D_ Thus, there is a need in the art for a quick, reliable, specific, and sensitive method to detect Zika virus._x000D_ Currently, PR is limited to platelets and plasma products._x000D_ If the sample is a complex mixture of nucleic acids, more cycl…	(US20170260596)_x000D_ 1. A method of detecting Zika virus in a sample, the method comprising: performing an amplifying step comprising contacting the sample with a set of primers to produce an amplification product if a nucleic acid sequence of Zika virus is present in the sample; performing a hybridizing step comprising contacting the amplification product with one or more detectable probes; an…	(US20170260596)_x000D_ In another embodiment, the present disclosure provides an oligonucleotide that, includes a nucleic acid having at least 70% sequence; identity (e.g., at least 75%, 80%, 85%, 90% or 95%, etc.) to one of SEQ ID Nos;1-12, or a complement thereof, which oligonucleotide has 100 or fewer nucleotides._x000D_ [0012] The present disclosure also provides for methods of detecting the …	(WO2017153566)_x000D_ International Search Report [Examiner]_x000D_ -ROBERT S. LANCIOTTI ET AL: "Genetic and Serologic Properties of Zika Virus Associated with an Epidemic, Yap State, Micronesia, 2007", EMERGING INFECTIOUS DISEASES, vol. 14, no. 8, 1 August 2008 (2008-08-01), US, pages 1232 - 1239, XP055302297, ISSN: 1080-6040, DOI: 10.3201/eid1408.080287CC=XP; XP055302297 (Cat. I,D)_x000D_ -ALYS…
77224306	C12Q-001/68/51_x000D_ C12Q-001/70/1_x000D_ C12Q-2600/16_x000D_ C12Q-2600/166_x000D_ Y02A-050/53	C12Q-001/68_x000D_ C12Q-001/70_x000D_ C12R-001/93	Biotechnology	CN201710497287	2017CN-0497287	2017-06-26	2017	(CN107151711)_x000D_ Double fluorescent quantitative RT-PCR (reverse transcription-polymerase chain reaction) kit for detecting dengue virus and zika virus	WANG XIANG_x000D_ WEN XIAOHONG_x000D_ CUI DAWEI_x000D_ GUO HUIHUI	(CN107151711)_x000D_ 王翔_x000D_ 温晓红_x000D_ 崔大伟_x000D_ 郭慧慧	(CN107151711)_x000D_ WANG XIANG_x000D_ WEN XIAOHONG_x000D_ CUI DAWEI_x000D_ GUO HUIHUI	HUZHOU NO 1 PEOPLE S HOSPITAL	HUZHOU NO 1 PEOPLE S HOSPITAL	HUZHOU NO 1 PEOPLE S HOSPITAL	(CN107151711)_x000D_ 湖州市第一人民医院			(CN107151711)_x000D_ HUZHOU NO.1 PEOPLE'S HOSPITAL		CN	ACADEMY	CN					PENDING	PENDING	ALIVE	ALIVE		2037-06-26	Y02A-050/53	C12Q-001/70	1	0	0	0	1		Biotechnology	(CN107151711)_x000D_ DENV(100,52)_x000D_ KIT(100,11)_x000D_ DENGUE(100,10)_x000D_ QUANTITATIVE RT PCR KIT(100,7)_x000D_ DUAL FLUORESCENT(100,5)_x000D_ NUCLEIC ACID(100,3)_x000D_ ZIKA VIRUS DUAL FLUORESCENT(100,3)_x000D_ DOUBLE ZIKA VIRUS FLUORESCENT(100,1)_x000D_ ZIKA VIRUS DENGUE(100,1)_x000D_ QUANTITATIVE RT PCR(54,23)_x000D_ DUAL FLUORESCENCE ZIKA VIRUS(47,1)_x000D_ DEOXYRIBONUCLEOTIDE TRIPHOS…	(CN107151711)_x000D_ The invention provides a double fluorescent quantitative RT-PCR (reverse transcription-polymerase chain reaction) kit for detecting dengue virus and zika virus.The kit comprises a quantitative RT-PCR reaction liquid, an enzyme mixed liquid, a primer probe mixed liquid, standard products (DENV and ZIKV), strong-positive reference products (DENV and ZIKV), weak-positive referen…	(CN107151711)_x000D_ The present invention has the advantages are: a Real-time using a one-step RT-PCR techniques, and the DENV ZIKV using highly specific primers and fluorescently labeled probes, developed for DENV and the ZIKV detected double fluorescent quantitative RT-PCR assay kit._x000D_ Zika virus infections without symptoms commonly, only about 20% exhibit symptoms of infection, the main …	(CN107151711)_x000D_ 1. A method for detecting dengue and Zika virus dual fluorescent quantitative RT-PCR kit, characterized in, this kit comprises the following components: quantitative RT-PCR reaction solution, enzymatic cocktail, primer probe mixture, DENV standards, standard ZIKV, DENV strong positive control, ZIKV strong positive control, DENV weak positive control, ZIKV weak positive contro…	(CN107151711)_x000D_ An object of the present invention is to provide a general-purpose Zika virus and a Dengue virus is detected for one-step dual fluorescence quantitative RT-PCR assay kit._x000D_ The present invention provides a method for detecting dengue and Zika virus of the dual fluorescence a quantitative RT-PCR kit._x000D_ The present invention provides fluorogenic assay kit are needed t…
[truncated: 170 more rows]
